# Supplementary material
Source: publisher figshare collection journal article supplement (https://acs.figshare.com/ndownloader/files/8225537)

# Supporting Information

## Cobalt-Catalyzed Allylic C(sp<sup>3</sup>)–H Carboxylation with CO<sub>2</sub>

Kenichi Michigami, Tsuyoshi Mita,\* and Yoshihiro Sato\*

*Faculty of Pharmaceutical Sciences, Hokkaido University, Sapporo  
060-0812, Japan*

tmita@pharm.hokudai.ac.jp

biyo@pharm.hokudai.ac.jp

# Table of Contents

|         |                                                                                    |      |
|---------|------------------------------------------------------------------------------------|------|
| (A)     | Supplemental Data                                                                  | S3   |
| (A-1)   | Optimization Details: Tables S1-S8                                                 | S3   |
| (A-2)   | Reaction of the Olefin Isomerization Product and the Methylated Product            | S7   |
| (A-3)   | Carboxylation Using Alkylolithium                                                  | S7   |
| (A-4)   | Substrate Scope                                                                    | S8   |
| (B)     | General                                                                            | S10  |
| (C)     | Materials and Methods                                                              | S10  |
| (C-1)   | Preparation of Substrates                                                          | S10  |
| (C-1-a) | Grignard Reaction                                                                  | S11  |
| (C-1-b) | Stille Coupling                                                                    | S11  |
| (C-1-c) | Synthesis of 1,4-Dienes <b>6a-6c</b> , and <b>6e</b>                               | S13  |
| (C-1-d) | Synthesis of 1,4-Diene <b>6f</b>                                                   | S15  |
| (C-2)   | General Procedure for Allylic C–H Carboxylation                                    | S16  |
| (C-2-a) | Representative Procedure ~ Condition Screening                                     | S16  |
| (C-2-b) | General Procedure ~ Substrate Scope                                                | S16  |
| (C-3)   | Derivatization of the Carboxylated Products                                        | S24  |
| (C-3-a) | Iodolactonization of <b>5i</b>                                                     | S24  |
| (C-3-b) | Tandem Olefin Epoxidation/Ring-Opening Lactonization                               | S24  |
| (C-3-c) | Sharpless Asymmetric Dihydroxylation of <b>5i</b> and <i>in situ</i> Lactonization | S25  |
| (C-3-d) | Sharpless Asymmetric Dihydroxylation of <b>5h</b> and <i>in situ</i> Lactonization | S26  |
| (D)     | References                                                                         | S27  |
| (E)     | <sup>1</sup> H NMR and <sup>13</sup> C NMR Spectra                                 | S29  |
| (F)     | HPLC Trace                                                                         | S104 |

## (A) Supplemental Data

### (A-1) Optimization Details: Tables S1-S8

Several reaction parameters of allylic C–H carboxylation were investigated. In each table, the yields were determined by  $^1\text{H}$  NMR analysis using 1,3,5-trimethoxybenzene as an internal standard.

**Table S1.** Solvent Effect in Allylic C–H Carboxylation

|                                                                                                                                                                                                                                                                                                                                    |             |           |           |           |          |           |
|------------------------------------------------------------------------------------------------------------------------------------------------------------------------------------------------------------------------------------------------------------------------------------------------------------------------------------|-------------|-----------|-----------|-----------|----------|-----------|
| <div><div></div><div><div>entry</div><div>solvent</div><div data-cs="5" data-kind="parent">yield (%)</div><div data-kind="ghost"></div><div data-kind="ghost"></div><div data-kind="ghost"></div><div data-kind="ghost"></div><div>2a</div><div><i>E</i>-3a</div><div><i>Z</i>-3a</div><div>4a</div><div>1a rec.</div></div></div> |             |           |           |           |          |           |
| 1 <sup>a</sup>                                                                                                                                                                                                                                                                                                                     | 1,4-dioxane | -         | -         | -         | -        | 99        |
| 2                                                                                                                                                                                                                                                                                                                                  | 1,4-dioxane | 4         | 82        | 8         | 6        | -         |
| 3                                                                                                                                                                                                                                                                                                                                  | THF         | -         | 82        | 11        | -        | -         |
| 4                                                                                                                                                                                                                                                                                                                                  | toluene     | -         | 86        | 11        | -        | -         |
| 5                                                                                                                                                                                                                                                                                                                                  | MeCN        | -         | 80        | 19        | -        | -         |
| 6                                                                                                                                                                                                                                                                                                                                  | DMF         | 4         | 52        | 12        | 2        | 30        |
| 7                                                                                                                                                                                                                                                                                                                                  | <b>DMA</b>  | <b>16</b> | <b>55</b> | <b>12</b> | <b>5</b> | <b>12</b> |
| 8                                                                                                                                                                                                                                                                                                                                  | NMP         | 4         | 50        | 11        | 3        | 21        |
| 9                                                                                                                                                                                                                                                                                                                                  | DMI         | 5         | 56        | 12        | 5        | 13        |

<sup>a</sup>The reaction was carried out in the absence of Co(acac)<sub>2</sub>.

**Table S2.** Investigation of Alkylmetal Reagents

|                                                                                                                                                                                                                                                                                                                                           |                         |           |           |           |          |           |
|-------------------------------------------------------------------------------------------------------------------------------------------------------------------------------------------------------------------------------------------------------------------------------------------------------------------------------------------|-------------------------|-----------|-----------|-----------|----------|-----------|
| <div><div></div><div><div>entry</div><div>MR<sub>n</sub></div><div data-cs="5" data-kind="parent">yield (%)</div><div data-kind="ghost"></div><div data-kind="ghost"></div><div data-kind="ghost"></div><div data-kind="ghost"></div><div>2a</div><div><i>E</i>-3a</div><div><i>Z</i>-3a</div><div>4a</div><div>1a rec.</div></div></div> |                         |           |           |           |          |           |
| 1                                                                                                                                                                                                                                                                                                                                         | <b>AlMe<sub>3</sub></b> | <b>16</b> | <b>55</b> | <b>12</b> | <b>5</b> | <b>12</b> |
| 2                                                                                                                                                                                                                                                                                                                                         | AlEt <sub>3</sub>       | -         | 90        | 2         | -        | -         |
| 3                                                                                                                                                                                                                                                                                                                                         | ZnMe <sub>2</sub>       | -         | 1         | -         | -        | 93        |
| 4                                                                                                                                                                                                                                                                                                                                         | ZnEt <sub>2</sub>       | -         | 11        | 2         | -        | 87        |

**Table S3.** Screening of Reaction Temperature and the Amount of the Catalyst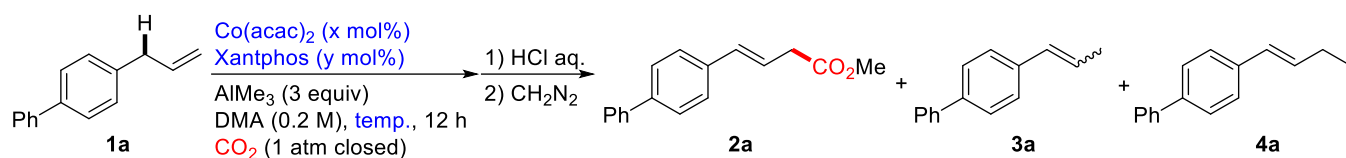

| entry | Co(acac) <sub>2</sub><br>(x mol%) | Xantphos<br>(y mol%) | temp. (°C) | yield (%) |              |              |    |         |
|-------|-----------------------------------|----------------------|------------|-----------|--------------|--------------|----|---------|
|       |                                   |                      |            | 2a        | <i>E</i> -3a | <i>Z</i> -3a | 4a | 1a rec. |
| 1     | 10                                | 10                   | rt         | 16        | 55           | 12           | 5  | 12      |
| 2     | 10                                | 10                   | 0          | -         | 33           | 5            | -  | 59      |
| 3     | 10                                | 10                   | 60         | 24        | 60           | 6            | 10 | -       |
| 4     | 10                                | 10                   | 100        | 10        | 71           | 3            | 7  | -       |
| 5     | 10                                | 20                   | 60         | 32        | 34           | 7            | 13 | -       |
| 6     | 10                                | 30                   | 60         | 25        | 36           | 7            | 14 | -       |
| 7     | 20                                | 40                   | 60         | 24        | 48           | 6            | 21 | -       |

**Table S4.** Ligand Screening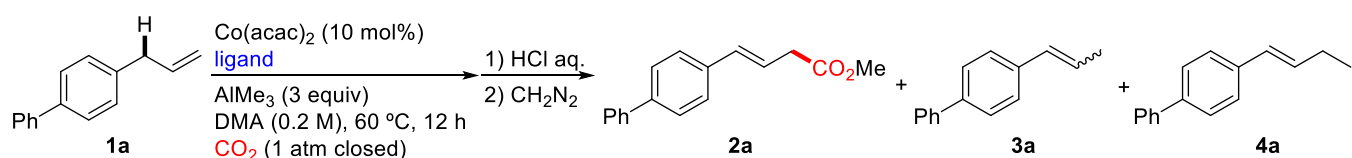

| entry | ligand (mol%)                         | yield (%) |              |              |    |         |
|-------|---------------------------------------|-----------|--------------|--------------|----|---------|
|       |                                       | 2a        | <i>E</i> -3a | <i>Z</i> -3a | 4a | 1a rec. |
| 1     | <i>Xantphos</i> (20)                  | 32        | 34           | 7            | 13 | -       |
| 2     | <b>L1</b> (20)                        | -         | 8            | 1            | -  | 86      |
| 3     | <b>L2</b> (20)                        | 33        | 35           | 4            | 15 | -       |
| 4     | NiXantphos (20)                       | 16        | 68           | 3            | 4  | -       |
| 5     | DBFphos (20)                          | -         | 80           | 3            | -  | 14      |
| 6     | DPEphos (20)                          | -         | 74           | 3            | -  | 9       |
| 7     | DPPF (20)                             | -         | 87           | 4            | 7  | -       |
| 8     | DPPP (20)                             | -         | 74           | 12           | 10 | -       |
| 9     | ( <i>S</i> )-DTBM-SEGPHOS (20)        | -         | 94           | 2            | -  | -       |
| 10    | ( <i>S,S</i> )-(R,R)-Ph-TRAP (20)     | 1         | 75           | 2            | 2  | -       |
| 11    | IPr·HCl (20), KO <sup>t</sup> Bu (20) | -         | 40           | 16           | -  | 39      |
| 12    | 2,2'-bpy (20)                         | -         | 90           | 3            | -  | 4       |
| 13    | ( <i>S,S</i> )-iPr-PyBox (10)         | -         | 5            | -            | -  | 93      |

**Table S5.** Investigation of Transition-Metal Catalysts and the Amount of AlMe<sub>3</sub>

Reaction scheme: **1a** (4-phenyl-1-butene) reacts with **catalyst, ligand**, **AlMe<sub>3</sub> (x equiv)**, **DMA (0.2 M), 60 °C, 12 h**, and **CO<sub>2</sub> (1 atm closed)** to form **2a** (methyl 4-phenyl-3-buten-1-yl carbonate), **3a** (E-4-phenyl-3-buten-1-yl carbonate), and **4a** (Z-4-phenyl-3-buten-1-yl carbonate).

Reaction conditions: 1) HCl aq., 2) CH<sub>2</sub>N<sub>2</sub>.

| entry     | catalyst<br>(mol%)                                                     | ligand<br>(mol%)     | AlMe <sub>3</sub><br>(x equiv) | yield (%) |                      |                      |           |                |
|-----------|------------------------------------------------------------------------|----------------------|--------------------------------|-----------|----------------------|----------------------|-----------|----------------|
|           |                                                                        |                      |                                | <b>2a</b> | <i>E</i> - <b>3a</b> | <i>Z</i> - <b>3a</b> | <b>4a</b> | <b>1a</b> rec. |
| 1         | Co(acac) <sub>2</sub> (10)                                             | Xantphos (20)        | 3                              | 32        | 34                   | 7                    | 14        | 0              |
| 2         | CoCl(PPh <sub>3</sub> ) <sub>3</sub> (10)                              | Xantphos (20)        | 3                              | 22        | 54                   | 12                   | 5         | 4              |
| 3         | Co(acac) <sub>3</sub> (10)                                             | Xantphos (20)        | 3                              | 21        | 58                   | 9                    | -         | -              |
| 4         | [Cp*CoCl <sub>2</sub> ] <sub>2</sub> (5)                               | none                 | 3                              | -         | 35                   | 5                    | -         | 59             |
| 5         | [Rh(cod)Cl] <sub>2</sub> (5)                                           | Xantphos (20)        | 3                              | -         | 25                   | 6                    | -         | 67             |
| 6         | Rh(acac) <sub>3</sub> (10)                                             | Xantphos (20)        | 3                              | -         | -                    | -                    | -         | 97             |
| 7         | [Ir(cod)Cl] <sub>2</sub> (5)                                           | Xantphos (20)        | 3                              | -         | 5                    | -                    | -         | 93             |
| 8         | CrCl <sub>2</sub> (10)                                                 | Xantphos (20)        | 3                              | -         | -                    | -                    | -         | 99             |
| 9         | MnCl <sub>2</sub> (10)                                                 | Xantphos (20)        | 3                              | -         | -                    | -                    | -         | 99             |
| 10        | MnBr(CO) <sub>5</sub> (10)                                             | Xantphos (20)        | 3                              | -         | -                    | -                    | -         | 98             |
| 11        | Fe(acac) <sub>3</sub> (10)                                             | Xantphos (20)        | 3                              | -         | 9                    | 2                    | -         | 86             |
| 12        | [RuCl <sub>2</sub> (PPh <sub>3</sub> ) <sub>2</sub> ] <sub>2</sub> (5) | Xantphos (20)        | 3                              | -         | 11                   | 2                    | -         | 67             |
| 13        | Ni(acac) <sub>2</sub> (10)                                             | Xantphos (20)        | 3                              | -         | 27                   | 3                    | -         | 69             |
| 14        | CuI (10)                                                               | Xantphos (20)        | 3                              | -         | 6                    | 2                    | -         | 89             |
| <b>15</b> | <b>Co(acac)<sub>2</sub> (10)</b>                                       | <b>Xantphos (20)</b> | <b>1.5</b>                     | <b>45</b> | <b>26</b>            | <b>5</b>             | <b>15</b> | <b>-</b>       |
| 16        | CoBr <sub>2</sub> (10)                                                 | Xantphos (20)        | 1.5                            | -         | 82                   | 7                    | -         | -              |
| 17        | Co(hfacac) <sub>2</sub> (10)                                           | Xantphos (20)        | 1.5                            | 19        | 37                   | 7                    | 13        | 9              |
| 18        | Co(dbm) <sub>2</sub> (10)                                              | Xantphos (20)        | 1.5                            | 27        | 33                   | 5                    | 20        | 3              |
| 19        | Co(salen) (10)                                                         | Xantphos (20)        | 1.5                            | 40        | 25                   | 6                    | 14        | 4              |

Chemical structures of catalysts: **Co(hfacac)<sub>2</sub>**, **Co(dbm)<sub>2</sub>**, and **Co(salen)**.

**Table S6.** Effect of Concentration and CO<sub>2</sub> Pressure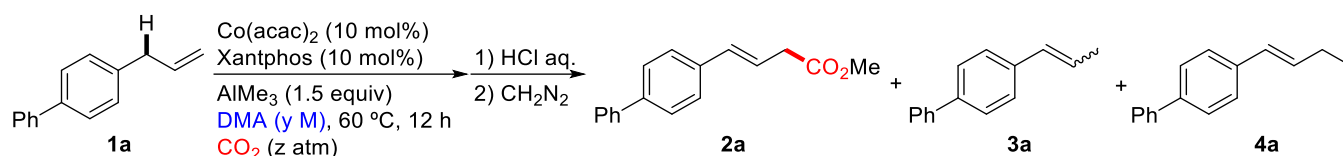

| entry | DMA<br>(y M) | CO <sub>2</sub><br>(z atm) | yield (%) |              |              |          |          |
|-------|--------------|----------------------------|-----------|--------------|--------------|----------|----------|
|       |              |                            | 2a        | <i>E</i> -3a | <i>Z</i> -3a | 4a       | 1a rec.  |
| 1     | 0.2          | 1 (closed)                 | 45        | 26           | 5            | 15       | -        |
| 2     | 0.1          | 1 (closed)                 | 55        | 15           | 3            | 11       | 5        |
| 3     | <b>0.05</b>  | <b>1 (closed)</b>          | <b>58</b> | <b>11</b>    | <b>3</b>     | <b>9</b> | <b>3</b> |
| 4     | 0.2          | 10                         | 56        | 18           | 5            | 5        | 15       |
| 5     | 0.1          | 10                         | 40        | 13           | 4            | 3        | 29       |
| 6     | 0.05         | 10                         | 33        | 13           | 4            | 2        | 39       |
| 7     | 0.2          | 5                          | 56        | 17           | 5            | 9        | 6        |
| 8     | 0.1          | 5                          | 51        | 12           | 4            | 4        | 23       |
| 9     | 0.05         | 5                          | 46        | 11           | 4            | 9        | 27       |
| 10    | 0.2          | 3                          | 61        | 13           | 3            | 12       | 2        |
| 11    | 0.1          | 3                          | 62        | 11           | 3            | 7        | 7        |
| 12    | <b>0.05</b>  | <b>3</b>                   | <b>66</b> | <b>15</b>    | <b>5</b>     | <b>4</b> | <b>9</b> |

When the reaction was conducted under 3 atm CO<sub>2</sub> pressure in the absence of CsF in DMA (0.05 M), the yield of **2a** was increased to 66% (entry 12, Table S6). This yield is nearly equal to that using CsF (entry 17, Table 1), indicating that solubility of CO<sub>2</sub> in DMA is a key factor for efficient carboxylation. However, much concentration of CO<sub>2</sub> somewhat inhibited the reaction (entries 4-9, Table S6).

**Table S7.** Examination of Additives and Re-Investigation of CO<sub>2</sub> Pressure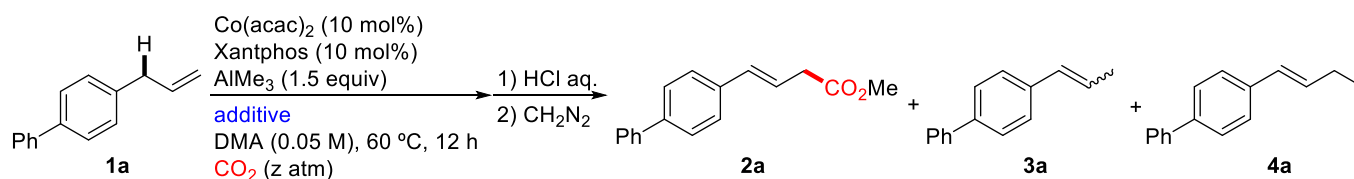

| entry | additive (equiv)                    | CO <sub>2</sub> (z atm) | yield (%) |              |              |          |          |
|-------|-------------------------------------|-------------------------|-----------|--------------|--------------|----------|----------|
|       |                                     |                         | 2a        | <i>E</i> -3a | <i>Z</i> -3a | 4a       | 1a rec.  |
| 1     | none                                | 3                       | 66        | 15           | 5            | 4        | 9        |
| 2     | CsF (1)                             | 3                       | 47        | 20           | 5            | -        | 20       |
| 3     | <b>CsF (1)</b>                      | <b>1 (closed)</b>       | <b>71</b> | <b>17</b>    | <b>3</b>     | <b>1</b> | <b>2</b> |
| 4     | CsF (3)                             | 1 (closed)              | 32        | 7            | 2            | -        | 50       |
| 5     | <b>CsF (1)</b>                      | <b>1 (balloon)</b>      | <b>67</b> | <b>17</b>    | <b>4</b>     | <b>3</b> | -        |
| 6     | Cs <sub>2</sub> CO <sub>3</sub> (1) | 1 (closed)              | 44        | 15           | 5            | 1        | 30       |
| 7     | Cs <sub>2</sub> CO <sub>3</sub> (1) | 1 (balloon)             | 57        | 16           | 5            | 2        | 15       |

**Table S8.** Screening of Xantphos Derivatives

Reaction scheme: **1a** (allylbenzene) reacts with  $\text{Co}(\text{acac})_2$  (10 mol%), **ligand** (20 mol%),  $\text{AlMe}_3$  (1.5 equiv),  $\text{CsF}$  (1 equiv),  $\text{DMA}$  (0.05 M),  $60^\circ\text{C}$ , 12 h, and  $\text{CO}_2$  (1 atm closed) to yield **2a** (methyl 3-allylbenzoate), **3a** (*E*-3-allylbenzoate), and **4a** (*Z*-3-allylbenzoate).

Reaction conditions: 1)  $\text{HCl}$  aq., 2)  $\text{CH}_2\text{N}_2$ .

| entry    | ligand          | yield (%) |                      |                      |           |                |
|----------|-----------------|-----------|----------------------|----------------------|-----------|----------------|
|          |                 | <b>2a</b> | <i>E</i> - <b>3a</b> | <i>Z</i> - <b>3a</b> | <b>4a</b> | <b>1a</b> rec. |
| <b>1</b> | <i>Xantphos</i> | <b>71</b> | <b>17</b>            | <b>3</b>             | <b>1</b>  | <b>2</b>       |
| 2        | <b>L2</b>       | 58        | 28                   | 8                    | 3         | 9              |
| 3        | <b>L3</b>       | -         | 18                   | 7                    | 16        | 55             |
| 4        | <b>L4</b>       | 40        | 45                   | 6                    | 2         | 10             |

Chemical structures of ligands **L2**, **L3**, and **L4** are shown. **L2** is a 1,1'-bis(diphenylphosphino)ferrocene derivative. **L3** and **L4** are ferrocene derivatives with *p*-tolyl and *p*-trifluoromethylphenyl groups, respectively.  $\text{R} = \text{p-tolyl}$  (**L3**) or  $\text{p-trifluoromethylphenyl}$  (**L4**).

**(A-2) Reaction of the Olefin Isomerization Product and the Methylated Product**

When the mixture of byproducts **3a** and **4a** (*E*-**3a**/**4a** = 86:14) were subjected to the optimized conditions under  $\text{CO}_2$ , any reactions did not occur and **3a** and **4a** were completely recovered with the same ratio.

**Scheme S1.** Attempt for Carboxylation of **3a** and **4a**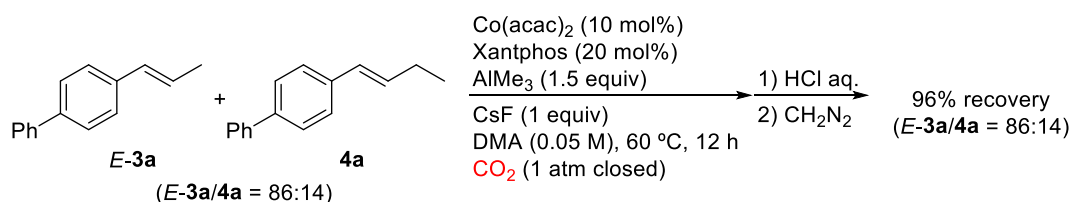**(A-3) Carboxylation Using Alkylolithium**

Deprotonation/carboxylation of allylarene **1a** and 1,4-diene **6d** was conducted using  $n\text{BuLi}$  and  $\text{CO}_2$  according to the reported procedure (Scheme S2, eq 1).<sup>1</sup> The reaction of **1a** provided a regioisomeric mixture of carboxylated products including double carboxylated product **S2a** (Scheme S2, eq 2),<sup>2</sup> while the same reaction (without esterification) of **6d** afforded only the olefin isomerization product **S8d** in 46% yield (Scheme S2, eq 3).<sup>3</sup> These results suggest that  $\text{Co}(\text{acac})_2/\text{Xantphos}/\text{AlMe}_3$  catalytic system is advantageous in terms of both regioselectivity and reactivity.

## Scheme S2. Carboxylation Using Alkyl lithium

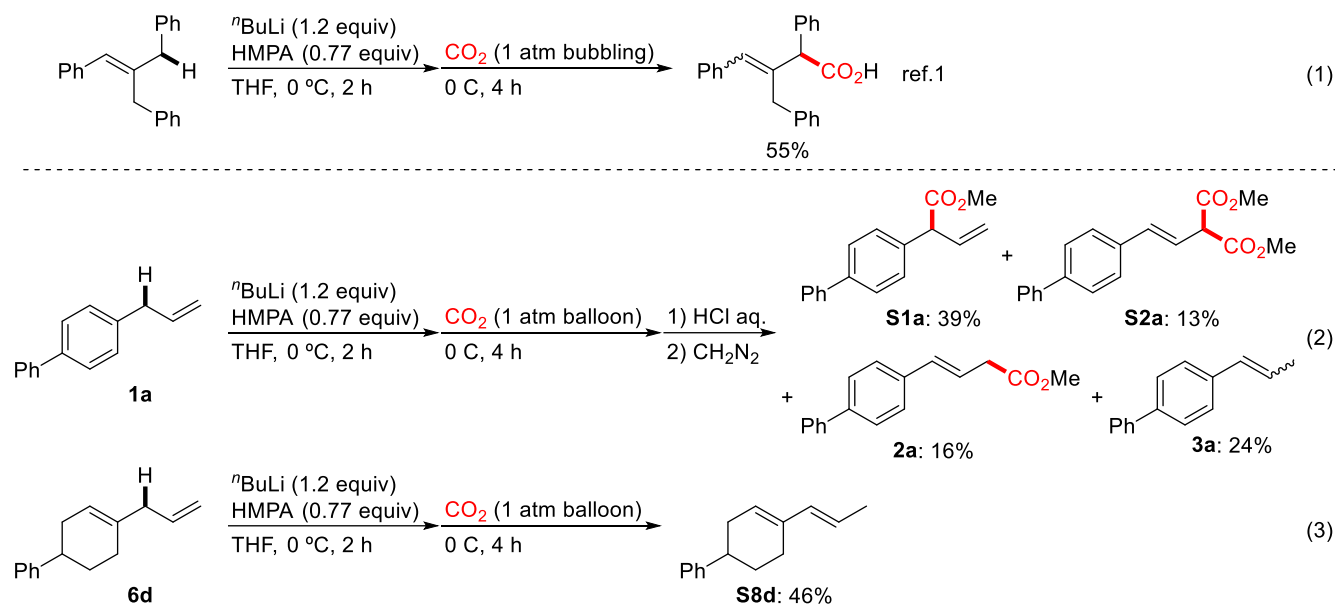

### (A-4) Substrate Scope

The results of substrate scope of allylic C–H carboxylation are summarized in the following tables. In every substrate, isolated yields are described for carboxylated products, and the yields of olefin isomers, methylated products, and recovered starting materials were determined by  $^1\text{H}$  NMR analysis using 1,3,5-trimethoxybenzene.

| substrate | products                                                                                                                                                                                                                                    | substrate         | products                                                      |
|-----------|---------------------------------------------------------------------------------------------------------------------------------------------------------------------------------------------------------------------------------------------|-------------------|---------------------------------------------------------------|
| <br>1     | Co(acac) <sub>3</sub> (10 mol%), Xantphos (20 mol%), AlMe <sub>3</sub> (1.5 equiv), CsF (1 equiv), DMA (0.05 M), 60 °C, 12 h, CO <sub>2</sub> (1 atm closed)<br>for 5: HCl aq.<br>for 2: 1) pH ~4 buffer, 2) CH <sub>2</sub> N <sub>2</sub> | <br>5 or<br><br>2 | <br>3 +<br>4                                                  |
| <br>1a    | <br>5a: 71%<br><br>3a: 16%<br><br>4a: 1%<br>1a rec.: 0%                                                                                                                                                                                     | <br>1i            | <br>5i: 69% (9%)<br><br>3i: 10%<br><br>4i: <1%<br>1i rec.: 0% |
| <br>1b    | <br>5b: 68% (3%)<br><br>3b: N.D. <sup>a</sup><br><br>4b: N.D. <sup>a</sup><br>1b rec.: N.D. <sup>a</sup>                                                                                                                                    | <br>1j            | <br>5j: 72%<br><br>3j: 25%<br><br>4j: 4%<br>1j rec.: 0%       |
| <br>1c    | <br>5c: 63% (2%)<br><br>3c: 19%<br><br>4c: 1%<br>1c rec.: 15%                                                                                                                                                                               | <br>1k            | <br>5k: 54% (2%)<br><br>3k: 31%<br><br>4k: 2%<br>1k rec.: 0%  |
| <br>1d    | <br>5d: 41%<br><br>3d: 44%<br><br>4d: 1%<br>1d rec.: 0%                                                                                                                                                                                     | <br>1l            | <br>5l: 63%<br><br>3l: 20%<br><br>4l: 5%<br>1l rec.: 0%       |
| <br>1e    | <br>5e: 65% (1%)<br><br>3e: N.D. <sup>a</sup><br><br>4e: N.D. <sup>a</sup><br>1e rec.: N.D. <sup>a</sup>                                                                                                                                    | <br>1m            | <br>5m: 77% (2%)<br><br>3m: 8%<br><br>4m: 2%<br>1m rec.: 0%   |
| <br>1f    | <br>5f: 55%<br><br>3f: 3% <sup>a</sup><br><br>4f: N.D. <sup>a</sup><br>1f rec.: N.D. <sup>a</sup>                                                                                                                                           | <br>1n            | <br>5n: 84% (8%)<br><br>3n: 8%<br><br>4n: <1%<br>1n rec.: 0%  |
| <br>1g    | <br>5g: 78% (4%)<br><br>3g: 9%<br><br>4g: <1%<br>1g rec.: 0%                                                                                                                                                                                | <br>1o            | <br>5o: 63%<br><br>3o: 16%<br><br>4o: 8%<br>1o rec.: 0%       |
| <br>1h    | <br>5h: 81% (11%)<br><br>3h: <7%<br><br>4h: 2%<br>1h rec.: 0%                                                                                                                                                                               |                   |                                                               |

<sup>a</sup>N.D. = Not determined. Yields were not determined because the materials were volatile under vacuum. The value in parentheses is the yield of the olefin isomer ( $\alpha,\beta$ -unsaturated carboxylic acids)  
<sup>b</sup>The reaction was carried out using 4 mmol of 1h in DMA (0.2 M) under CO<sub>2</sub> (1 atm, balloon).



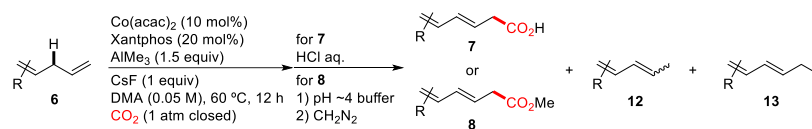

| substrate                         | products                                                                                                                            | substrate     | products                                                                                       |
|-----------------------------------|-------------------------------------------------------------------------------------------------------------------------------------|---------------|------------------------------------------------------------------------------------------------|
| <br><b>6a</b>                     | <br><b>7a</b> : 75% ( <i>E/Z</i> = 90:10)<br><b>12a</b> : N.D. <sup>a</sup><br><b>13a</b> : N.D. <sup>a</sup><br><b>6a</b> rec: 0%  | <br><b>6d</b> | <br><b>7d</b> : 78%<br><b>12d</b> : N.D. <sup>a</sup><br><b>13d</b> : 0%<br><b>6d</b> rec: 6%  |
| <br><b>6b</b> ( <i>E/Z</i> = 3:2) | <br><b>7b</b> : 45% ( <i>E/Z</i> = 65:35)<br><b>12b</b> : 19%<br><b>13b</b> : 6%<br><b>6b</b> rec: 6%                               | <br><b>6e</b> | <br><b>7e</b> : 57%<br><b>12e</b> : N.D. <sup>a</sup><br><b>13e</b> : 0%<br><b>6e</b> rec: 31% |
| <br><b>6c</b> ( <i>E/Z</i> = 1:1) | <br><b>7c</b> : 68% ( <i>E/Z</i> = 55:45)<br><b>12c</b> : N.D. <sup>a</sup><br><b>13c</b> : N.D. <sup>a</sup><br><b>6c</b> rec: 15% | <br><b>6f</b> | <br><b>8f</b> : 41%<br><b>12f</b> : N.D. <sup>a</sup><br><b>13f</b> : 0%<br><b>6f</b> rec: 46% |

<sup>a</sup>N.D. = Not determined. Yields were not correctly determined because the corresponding peaks were overlapped.

## (B) General

All manipulations were carried out under an atmosphere of argon or nitrogen unless otherwise noted. Carboxylation reactions under “1 atm, closed” CO<sub>2</sub> atmosphere were carried out in a pressure-proof mini vacuum tube (20 mL,  $\phi$  19 mm x 100 mm,  $\phi$  13 mm), which was purchased from OSAKA CHEMICAL Co., Ltd. The reactions under higher ( $\geq 3$  atm) CO<sub>2</sub> pressure were carried out in an autoclave (10 mL, Portable reactor, TVS-1), which was purchased from TAIATSU TECHNO. Infrared (IR) spectra were recorded on a JASCO FT/IR 460 Plus Fourier transform infrared spectrophotometer. NMR spectra were recorded on a JEOL ECA-500 spectrometer, operating at 500 MHz (<sup>1</sup>H) or 125 MHz (<sup>13</sup>C). Chemical shifts in CDCl<sub>3</sub> and acetone-*d*<sub>6</sub> were reported in the scale relative to CHCl<sub>3</sub> (7.26 ppm) and acetone (2.05 ppm) for <sup>1</sup>H NMR, and to CDCl<sub>3</sub> (77.0 ppm) and acetone-*d*<sub>6</sub> (29.84 ppm) for <sup>13</sup>C NMR as internal references, respectively. NMR data are reported as follows: chemical shifts, multiplicity (s: singlet, d: doublet, t: triplet, q: quartet, quin: quintet, m: multiplet, br: broad signal, app: apparently), coupling constant (Hz), and integration. EI-HRMS and ESI-HRMS spectra were measured on a JEOL JMS-T100GCv and Thermo Scientific Exactive, respectively. Gel permeation chromatography was performed on HPLC LC-9201 (Japan Analytical Industry Co., Ltd). Optical rotations were measured on a Jasco P-1030 digital polarimeter at the sodium D line (589 nm). Chiral HPLC analyses were carried out using a Jasco PU-980 and using the indicated chiral column. Column chromatography was performed with Wakogel<sup>®</sup> FC-40 (20-40  $\mu$ m, spherical, neutral). Dry toluene, THF, MeCN, and DMF were purified under argon using the Ultimate Solvent System (Glass Counter Inc.). 1,4-Dioxane was distilled from Na/benzophenone. DMA, NMP, and DMI were distilled from CaH<sub>2</sub>. CrCl<sub>2</sub> and DPEphos were purchased from Strem Chemicals Inc. MnCl<sub>2</sub>, Co(hfacac)<sub>2</sub>, Fe(acac)<sub>3</sub>, DCPE, DPPF, **L1**, and AlMe<sub>3</sub> (2.0 M in toluene) were purchased from Sigma-Aldrich Co. LLC. CoCl<sub>2</sub>, CoBr<sub>2</sub>, 2,2'-bpy, AlEt<sub>3</sub> (1.0 M in hexane), ZnMe<sub>2</sub> (1.0 M in hexane), and ZnEt<sub>2</sub> (1.0 M in hexane) were purchased from Kanto Chemical Co., Inc. Co(acac)<sub>2</sub>, Co(acac)<sub>3</sub>, Ni(acac)<sub>2</sub>, Xantphos, NiXantphos, DPPP, and (*S,S*)-*i*Pr-PyBox were purchased from Tokyo Kasei, Co., Ltd. CsF was purchased from Nacalai Tesque, Inc. Cs<sub>2</sub>CO<sub>3</sub> was purchased from Kishida Chemical Co., Ltd. All materials purchased were used as received. MnBr(CO)<sub>5</sub>,<sup>4</sup> CoCl(PPh<sub>3</sub>)<sub>3</sub>,<sup>5</sup> Co(dbm)<sub>2</sub>,<sup>6</sup> Co(salen),<sup>7</sup> [Cp\*CoCl<sub>2</sub>]<sub>2</sub>,<sup>8</sup> [Rh(cod)Cl]<sub>2</sub>,<sup>9</sup> Rh(acac)<sub>3</sub>,<sup>10</sup> [Ir(cod)Cl]<sub>2</sub>,<sup>11</sup> DBFphos,<sup>12</sup> (*S,S*)-(*R,R*)-Ph-TRAP,<sup>13</sup> IPr-HCl,<sup>14</sup> **L2**,<sup>15</sup> **L3**,<sup>13</sup> and **L4**<sup>16</sup> were prepared according to the reported procedures. CH<sub>2</sub>N<sub>2</sub> in Et<sub>2</sub>O was prepared by the addition of 1-methyl-3-nitro-1-nitrosoguanidine into 40 w/w% KOH aq./Et<sub>2</sub>O, 1:2 at 0 °C. DMDO (*ca.* 0.05 M in acetone) was prepared by the reaction of acetone with Oxone<sup>®</sup>.<sup>17</sup>

## (C) Materials and Methods

### (C-1) Preparation of Substrates

Allylbenzene (**1b**), safrole (**1i**), and eugenol (**1j**) were purchased from Tokyo Kasei, Co. Ltd., which were used as received. 4-Allyl-1,1'-biphenyl (**1a**),<sup>18</sup> 2-allyl-1,1'-biphenyl (**1c**),<sup>19</sup> 2-allylnaphthalene (**1d**),<sup>20</sup> 1-allyl-4-(trifluoromethyl)benzene (**1e**),<sup>21</sup> 3-allylanisole (**1g**),<sup>21</sup> 2-allyl-1,4-dimethoxybenzene (**1h**),<sup>22</sup> methyl 4-allylbenzoate (**1l**),<sup>23</sup> and 3-allylquinoline (**1o**)<sup>24</sup> were prepared by reported procedures.

**(C-1-a) Grignard Reaction**<sup>18</sup>

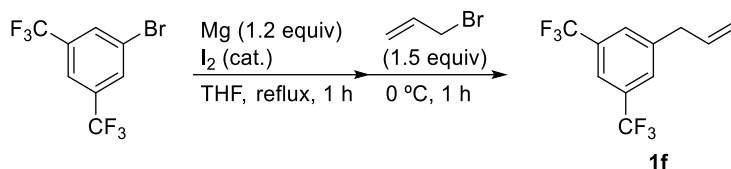

**1-Allyl-3,5-bis(trifluoromethyl)benzene (1f):** To an oven-dried two-necked round-bottom flask equipped

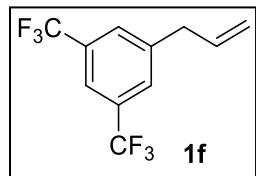

with reflux condenser and dropping funnel was placed Mg turnings (632.1 mg, 26 mmol, 1.2 equiv). A solution of 1-bromo-3,5-bis(trifluoromethyl)benzene (5.86 g, 20 mmol, 1 equiv) and a tiny crystal of I<sub>2</sub> in THF (12 mL, 1.6 M) was added to the dropping funnel, and a few milliliter of the solution was poured under vigorous stirring

to initiate the reaction. The remaining solution was further added dropwise over 4 h. After complete addition, the mixture was stirred under reflux for 1 h, then cooled to 0 °C. To the reaction mixture was added allyl bromide (3.63 g, 30 mmol, 1.5 equiv) dropwise followed by stirring at room temperature for 1 h before quenching by sat.  $\text{NH}_4\text{Cl}$  aq. The solids were filtered off and the filtrate was extracted with ethyl acetate (3 times). The combined organic layer was washed with brine and dried over  $\text{Na}_2\text{SO}_4$ . After the solids were filtered off, the solvent was removed under reduced pressure, and the residue was roughly purified by silica-gel column chromatography (eluent: hexane). And the impurities were separated by GPC (eluent:  $\text{CHCl}_3$ ) to afford **1f** as colorless liquid (1.19 g, 7.5 mmol, 38%).

IR (neat)  $\tilde{\nu}$ : 3088, 2986, 2921, 1644, 1623, 1467, 1378, 1280, 1173, 1134, 993, 926, 902  $\text{cm}^{-1}$ ;  $^1\text{H}$  NMR (500 MHz,  $\text{CDCl}_3$ )  $\delta$ : 7.73 (s, 2H), 7.64 (s, 1H), 5.99-5.91 (m, 1H), 5.20 (d,  $J = 9.2$  Hz, 1H), 5.15 (d,  $J = 16.6$  Hz, 1H), 3.52 (d,  $J = 6.9$  Hz, 2H) ppm;  $^{13}\text{C}$  NMR (125 MHz,  $\text{CDCl}_3$ )  $\delta$ : 142.5, 135.2 (app d,  $J_{\text{CF}} = 2.4$  Hz), 131.7 (q,  $J_{\text{CF}} = 33.0$  Hz), 128.8 (app d,  $J_{\text{CF}} = 2.4$  Hz), 124.5 (q,  $J_{\text{CF}} = 270.3$  Hz), 120.2 (app quin,  $J_{\text{CF}} = 3.6$  Hz), 117.8 (app t,  $J_{\text{CF}} = 3.6$  Hz), 39.6 ppm; HRMS (EI)  $m/z$  calcd. for  $\text{C}_{11}\text{H}_8\text{F}_6$ ,  $[\text{M}]^+$ : 254.0530, found: 254.0523.

**(C-1-b) Stille Coupling<sup>25,26</sup>**

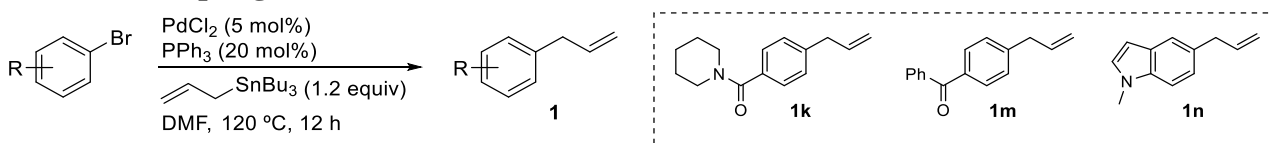

To an oven-dried 30 mL recovery flask were placed PdCl<sub>2</sub> (88.7 mg, 0.5 mmol, 5 mol%) and PPh<sub>3</sub> (524.6 mg, 2.0 mmol, 20 mol%), which were dissolved in DMF (10 mL) followed by the addition of aryl bromide (10 mmol, 1 equiv) and allyltributyltin (3.97 g, 12 mmol, 1.2 equiv). The resulting mixture was then stirred at 120 °C for 12 h. After cooling to room temperature, the mixture was diluted in 10 w/w% aq. KF. The resulting precipitate was filtered off through Celite®. After the cake was washed with ethyl acetate, the filtrate was extracted with ethyl acetate (2 times), and the combined organic layer was washed with brine and dried over Na<sub>2</sub>SO<sub>4</sub>. After the solids were filtered off, the solvent was removed under reduced pressure, and the residue was purified by silica-gel column chromatography to afford the corresponding allylarene.

***N*-(4-Allylbenzoyl)piperidine (1k):** *N*-(4-Bromobenzoyl)piperidine<sup>27</sup> (2.68 g, 10 mmol, 1 equiv) was used

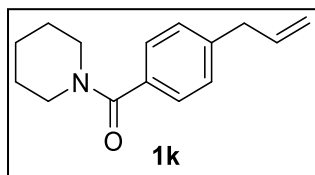

as a substrate. The crude product was purified by silica-gel column chromatography (eluent: hexane/ethyl acetate, 3:1) to afford **1k** as pale yellow oil (1.99 g, 8.7 mmol, 87%)

IR (neat)  $\tilde{\nu}$ : 2936, 2854, 1631, 1431, 1275, 1108, 1001, 915, 852, 757  $\text{cm}^{-1}$ ;  $^1\text{H}$  NMR (500 MHz,  $\text{CDCl}_3$ )  $\delta$ : 7.32 (d,  $J$  = 8.0 Hz, 2H), 7.20 (d,  $J$  = 8.0 Hz, 2H), 5.99-5.91 (m, 1H), 5.11-5.07 (m, 2H), 3.69 (app br s, 2H), 3.40 (d,  $J$  = 6.3 Hz, 2H), 3.35 (app br s, 2H), 1.66 (app br s, 4H), 1.51 (app br s, 2H) ppm;  $^{13}\text{C}$  NMR (125 MHz,  $\text{CDCl}_3$ )  $\delta$ : 170.2, 141.4, 136.7, 134.2, 128.5, 126.9, 116.1, 48.7, 43.0, 39.9, 26.5, 25.5, 24.5 ppm; HRMS (EI)  $m/z$  calcd. for  $\text{C}_{15}\text{H}_{18}\text{NO}$ ,  $[\text{M}-\text{H}]^+$ : 228.1388, found: 228.1390.

**(4-Allylphenyl)(phenyl)methanone (1m):** 4-Bromobenzophenone (2.61 g, 10 mmol, 1 equiv) was used as

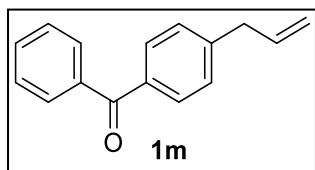

a substrate. The crude product was purified by silica-gel column chromatography (eluent: hexane/ethyl acetate, 40:1 to 20:1) and passing through 10 w/w%  $\text{K}_2\text{CO}_3$  silica gel (eluent: hexane/ethyl acetate, 20:1) to afford **1m** as colorless oil (1.76 g, 7.9 mmol, 79%).

IR (neat)  $\tilde{\nu}$ : 3060, 1657, 1604, 1446, 1414, 1279, 1177, 999, 924, 702  $\text{cm}^{-1}$ ;  $^1\text{H}$  NMR (500 MHz,  $\text{CDCl}_3$ )  $\delta$ : 7.79 (d,  $J$  = 7.7 Hz, 2H), 7.76 (d,  $J$  = 8.3 Hz, 2H), 7.58 (t,  $J$  = 7.4 Hz, 1H), 7.48 (dd,  $J$  = 7.7, 7.4 Hz, 2H), 7.31 (d,  $J$  = 8.3 Hz, 2H), 6.03-5.95 (m, 1H), 5.15-5.11 (m, 2H), 3.48 (d,  $J$  = 6.9 Hz, 2H) ppm;  $^{13}\text{C}$  NMR (125 MHz,  $\text{CDCl}_3$ )  $\delta$ : 196.4, 145.1, 137.8, 136.3, 135.5, 132.2, 130.4, 129.9, 128.5, 128.2, 116.6, 40.1 ppm; HRMS (EI)  $m/z$  calcd. for  $\text{C}_{16}\text{H}_{14}\text{O}$ ,  $[\text{M}]^+$ : 222.1045, found: 222.1049.

**5-Allyl-1-methyl-1*H*-indole (1n):** 5-Bromo-1-methyl-1*H*-indole<sup>28</sup> (2.10 g, 10 mmol, 1 equiv) was used as

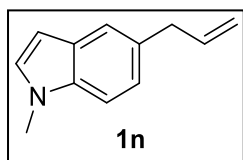

a substrate. After extraction, the combined organic layer was washed with 1%  $\text{H}_2\text{O}_2$  aq. to oxidize  $\text{PPh}_3$  to phosphine oxide. The crude material was purified by silica-gel column chromatography (eluent: hexane/ethyl acetate, 100:1) followed by passing through 10 w/w%  $\text{K}_2\text{CO}_3$  silica gel (eluent: hexane/ethyl acetate, 50:1), which afforded **1n** as colorless oil (1.36 g, 8.0 mmol, 80%).

IR (neat)  $\tilde{\nu}$ : 2975, 2900, 1637, 1492, 1422, 1338, 1244, 1079, 994, 911, 792, 720  $\text{cm}^{-1}$ ;  $^1\text{H}$  NMR (500 MHz,  $\text{CDCl}_3$ )  $\delta$ : 7.45 (s, 1H), 7.27 (d,  $J$  = 7.6 Hz, 1H), 7.08 (dd,  $J$  = 7.6, 1.4 Hz, 1H), 7.03 (d,  $J$  = 2.9 Hz, 1H), 6.43 (d,  $J$  = 2.9 Hz, 1H), 6.09-6.01 (m, 1H), 5.11 (dd,  $J$  = 17.2, 1.6 Hz, 1H), 5.06 (dd,  $J$  = 10.0, 1.6 Hz, 1H), 3.78 (s, 3H), 3.51 (d,  $J$  = 6.9 Hz, 2H) ppm;  $^{13}\text{C}$  NMR (125 MHz,  $\text{CDCl}_3$ )  $\delta$ : 138.7, 135.5, 130.8, 128.9, 128.7, 122.6, 120.3, 114.9, 109.0, 100.5, 40.4, 32.8 ppm; HRMS (EI)  $m/z$  calcd. for  $\text{C}_{12}\text{H}_{12}\text{N}$ ,  $[\text{M}-\text{H}]^+$ : 170.1970, found: 170.0970.

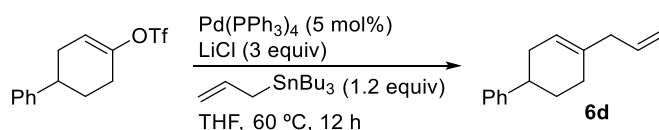

**1-Allyl-4-phenylcyclohex-1-ene (6d):** In an argon-filled glove box,  $\text{Pd}(\text{PPh}_3)_4$  (138.7 mg, 0.12 mmol, 5

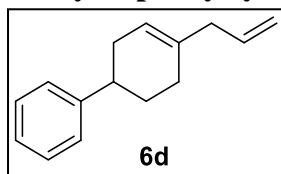

mol%) and  $\text{LiCl}$  (508.7 mg, 12 mmol, 3 equiv) were placed into the 50 mL recovery flask. The solids were then dissolved in THF (15 mL) followed by the addition of allyltributyltin (1.59 g, 4.8 mmol, 1.2 equiv) and 4-phenylcyclohex-1-en-1-yl

trifluoromethanesulfonate<sup>29</sup> (1.25 g, 4 mmol, 1 equiv) in THF (5 mL). The resulting mixture was stirred at 60 °C for 12 h before quenching by water, and the solution was extracted with ethyl acetate (3 times). The combined organic layer was washed with brine and dried over Na<sub>2</sub>SO<sub>4</sub>. After the solids were filtered off, the solvent was removed under reduced pressure, and the residue was purified by silica-gel column chromatography (eluent: hexane/ethyl acetate, 100:0 to 20:1) followed by passing through 10 w/w% KF silica gel (eluent: hexane) to afford **6d** as colorless liquid (577.0 mg, 2.91 mmol, 73%).

IR (neat)  $\tilde{\nu}$ : 2915, 1637, 1603, 1494, 1453, 1434, 996, 913, 755, 699 cm<sup>-1</sup>; <sup>1</sup>H NMR (500 MHz, CDCl<sub>3</sub>)  $\delta$ : 7.31 (dd, *J* = 7.7, 7.4 Hz, 2H), 7.23 (d, *J* = 7.7 Hz, 2H), 7.20 (t, *J* = 7.4 Hz, 1H), 5.89-5.80 (m, 1H), 5.54 (d, *J* = 4.4 Hz, 1H), 5.09-5.03 (m, 2H), 2.79-2.74 (m, 3H), 2.31 (dd, *J* = 11.5, 4.4 Hz, 1H), 2.19-2.13 (m, 2H), 2.06 (dd, *J* = 17.8, 4.4 Hz, 1H), 1.98-1.95 (m, 1H), 1.81-1.73 (m, 1H) ppm; <sup>13</sup>C NMR (125 MHz, CDCl<sub>3</sub>)  $\delta$ : 147.2, 136.7, 136.2, 128.3, 126.9, 125.9, 121.5, 115.7, 42.1, 40.2, 33.6, 30.0, 29.0 ppm; HRMS (EI) *m/z* calcd. for C<sub>15</sub>H<sub>18</sub>, [M]<sup>+</sup>: 198.1409, found: 198.1406.

### (C-1-c) Synthesis of 1,4-Dienes **6a-6c**, and **6e**

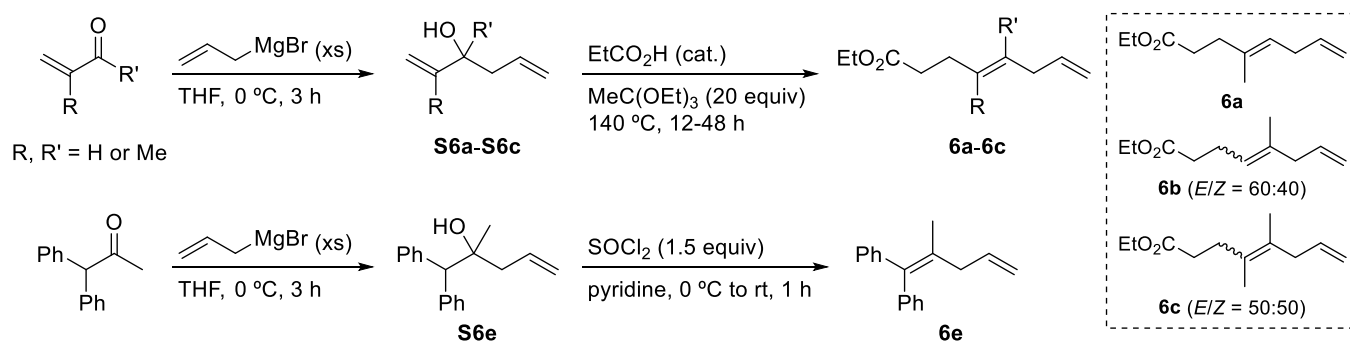

To an oven-dried three-necked round-bottom flask equipped with a condenser and a dropping funnel was placed Mg turnings (9.7 g, 0.4 mol, 1.2 equiv to allyl bromide). A solution of allyl bromide (36.3 g, 0.3 mol, 1 equiv) and a tiny crystal of I<sub>2</sub> in Et<sub>2</sub>O (300 mL, 1 M) was added to the dropping funnel. The reaction was initiated by the addition of a few milliliter of the solution under vigorous stirring, and the remaining solution was dropped into the mixture under gentle reflux. After complete addition, the mixture was stirred for 30 minutes at the same temperature.

To an oven-dried 100 mL recovery flask were added  $\alpha,\beta$ -unsaturated aldehyde or ketones (30 mmol, 1 equiv) and THF (30 mL, 1 M), which was then cooled to 0 °C. Allylmagnesium bromide in Et<sub>2</sub>O (60 mL) was then added dropwise *via* syringe, and the resulting suspension was allowed to warm to room temperature and stirred overnight. The reaction was quenched by sat. NH<sub>4</sub>Cl aq. and the solids were filtered off through Celite<sup>®</sup>. The filtrate was then extracted with ethyl acetate (3 times). The combined organic layer was washed with brine and dried over Na<sub>2</sub>SO<sub>4</sub>. The solids were filtered off, and the solvent was roughly evaporated, followed by Kugelrohr distillation of the residue under reduced pressure (*ca.* 150 mmHg), which afforded the corresponding alcohol **S6a-S6c** as a mixture with ethyl acetate, which was used to the next reaction without further purification.

The alcohol was diluted in MeC(OEt)<sub>3</sub> and a few drops of propionic acid were added. The resulting solution was heated at 140 °C for indicated time. After cooling to room temperature, MeC(OEt)<sub>3</sub> was roughly distilled off under ambient pressure (bath temp.: 170 °C) and the residue was purified by silica-gel column chromatography to afford the corresponding 1,4-diene **6a-6c**.

**Ethyl (E)-4-methylocta-4,7-dienoate (6a):** Metacrolein (2.10 g, 30 mmol, 1 equiv) was used as a substrate.

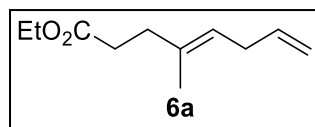

The obtained alcohol **S6a** (*ca.* 20 mmol) was heated in MeC(OEt)<sub>3</sub> (64.9 g, 0.4 mol, 20 equiv) with a few drops of propionic acid for 24 h, and after silica-gel column chromatography (eluent: hexane/ethyl acetate, 50:1), **6a** was obtained as colorless liquid (1.77 g, 9.7 mmol, 34%, 2 steps).

IR (neat)  $\tilde{\nu}$ : 2979, 1738, 1637, 1446, 1371, 1253, 1157, 1037, 910 cm<sup>-1</sup>; <sup>1</sup>H NMR (500 MHz, CDCl<sub>3</sub>)  $\delta$ : 5.82-5.74 (m, 1H), 5.20 (td, *J* = 7.0, 1.3 Hz, 1H), 5.00 (dd, *J* = 17.2, 1.7 Hz, 1H), 4.95 (dd, *J* = 10.3, 1.7 Hz, 1H), 4.12 (q, *J* = 7.2 Hz, 2H), 2.74 (t, *J* = 7.0 Hz, 2H), 2.41 (t, *J* = 7.6 Hz, 2H), 2.33 (t, *J* = 7.6 Hz, 2H), 1.62 (s, 3H), 1.25 (t, *J* = 7.2 Hz, 3H) ppm; <sup>13</sup>C NMR (125 MHz, CDCl<sub>3</sub>)  $\delta$ : 173.4, 137.0, 134.7, 122.2, 114.3, 60.2, 34.6, 33.1, 32.1, 15.8, 14.2 ppm; HRMS (EI) *m/z* calcd. for C<sub>11</sub>H<sub>18</sub>O<sub>2</sub>, [M]<sup>+</sup>: 182.1307, found: 182.1301.

**Ethyl 5-methylocta-4,7-dienoate (6b, E/Z = 60:40):** Methyl vinyl ketone (2.10 g, 30 mmol, 1 equiv) was

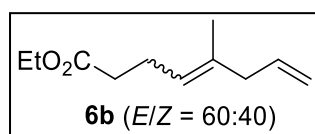

used as a substrate. The obtained alcohol **S6b** (*ca.* 8 mmol) was heated in MeC(OEt)<sub>3</sub> (26.0 g, 0.16 mol, 20 equiv) with a few drops of propionic acid for 36 h, and after silica-gel column chromatography (eluent: hexane/ethyl acetate,

50:1), a regioisomeric mixture of **6b** was obtained as colorless liquid (217.0 mg, 1.2 mmol, 4%, 2 steps).

IR (neat)  $\tilde{\nu}$ : 2979, 1738, 1637, 1445, 1372, 1252, 1180, 1042, 913 cm<sup>-1</sup>; <sup>1</sup>H NMR (500 MHz, CDCl<sub>3</sub>)  $\delta$ : 5.80-5.70 (m, 1H), 5.19 (t, *J* = 6.8 Hz, 0.4H, *Z* isomer), 5.15 (t, *J* = 6.9 Hz, 0.6H, *E* isomer), 5.05-4.98 (m, 2H), 4.12 (q, *J* = 7.0 Hz, 2H), 2.78 (d, *J* = 6.8 Hz, 0.8H, *Z* isomer), 2.70 (d, *J* = 6.9 Hz, 1.2H, *E* isomer), 2.33-2.32 (m, 4H), 1.67 (s, 1.2H, *Z* isomer), 1.61 (s, 1.8H, *E* isomer), 1.25 (t, *J* = 7.0 Hz, 3H) ppm; <sup>13</sup>C NMR (125 MHz, CDCl<sub>3</sub>)  $\delta$ : 173.33, 173.28, 136.7, 135.8, 135.0, 134.5, 123.9, 123.3, 115.7, 115.2, 60.2, 44.0, 36.6, 34.5, 34.4, 23.6, 23.4, 23.3, 16.0, 14.2 ppm; HRMS (EI) *m/z* calcd. for C<sub>11</sub>H<sub>18</sub>O<sub>2</sub>, [M]<sup>+</sup>: 182.1307, found: 182.1310.

**Ethyl 4,5-dimethylocta-4,7-dienoate (6c, E/Z = 50:50):** 2-Methylbut-1-ene-3-one (2.52 g, 30 mmol, 1

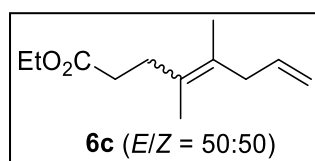

equiv) was used as a substrate. The obtained alcohol **S6c** (*ca.* 9 mmol) was heated in MeC(OEt)<sub>3</sub> (29.2 g, 0.18 mol, 20 equiv) with a few drops of propionic acid for 48 h, and after silica-gel column chromatography (eluent: hexane/ethyl acetate, 50:1), a regioisomeric mixture of **6c** was obtained as colorless liquid (403.0 mg,

2.1 mmol, 7%, 2 steps).

IR (neat)  $\tilde{\nu}$ : 2979, 1737, 1636, 1446, 1371, 1254, 1166, 1039, 911 cm<sup>-1</sup>; <sup>1</sup>H NMR (500 MHz, CDCl<sub>3</sub>)  $\delta$ : 5.78-5.69 (m, 1H), 5.02-4.95 (m, 2H), 4.12 (q, *J* = 7.2 Hz, 2H), 2.79 (d, *J* = 7.0 Hz, 1H, *Z* isomer), 2.75 (d, *J* = 6.5 Hz, 1H, *E* isomer), 2.40-2.31 (m, 4H), 1.66-1.62 (m, 6H), 1.25 (t, *J* = 7.2 Hz, 3H) ppm; <sup>13</sup>C NMR (125 MHz, CDCl<sub>3</sub>)  $\delta$ : 173.5, 136.5, 135.8, 127.6, 127.5, 127.3, 114.8, 114.5, 60.2, 38.9, 38.5, 33.3, 33.0, 30.0, 29.5, 18.04, 18.01, 17.6, 14.2 ppm; HRMS (EI) *m/z* calcd. for C<sub>12</sub>H<sub>20</sub>O<sub>2</sub>, [M]<sup>+</sup>: 196.1463, found: 196.1466.

**1,1-Diphenyl-2-methylpenta-1,4-diene (6e):** To an oven-dried 50 mL recovery flask was added 1,1-diphenylacetone (2.10 g, 10 mmol, 1 equiv), which was dissolved in THF (10 mL) and cooled to 0 °C. Allylmagnesium bromide in Et<sub>2</sub>O (15 mL) was added dropwise *via* syringe, and the resulting mixture was allowed to warm to ambient temperature and stirred overnight. The reaction was quenched by 1 M HCl aq. (20 mL), and extracted with ethyl acetate (2 times). The combined organic layer was washed with brine and dried over Na<sub>2</sub>SO<sub>4</sub>. After the solids were filtered off, the solvent was removed under reduced pressure, the residue was passed through a plug of silica gel (eluent: hexane/ethyl acetate, 30:1) to afford the alcohol **S6e** as a mixture with starting material (1.32 g, *ca.* 5.2 mmol), which was used to the next reaction without further purification. The obtained mixture (1.0 g, *ca.* 4 mmol, 1 equiv) was diluted in pyridine (16 mL) and cooled to -40 °C. To this solution was added SOCl<sub>2</sub> (713.8 mg, 6.0 mmol, *ca.* 15 equiv) dropwise. The resulting mixture was stirred at the same temperature for 10 min, then warmed to 0 °C and further stirred for 30 min. The reaction was quenched with 1 M HCl aq. (20 mL) and extracted with hexane (3 times). The combined organic layer was washed with 1 M HCl aq. (3 times) followed by brine. After the organic layer was dried over Na<sub>2</sub>SO<sub>4</sub>, the solids were filtered off and the solvent was removed under reduced pressure. The residue was then purified by silica-gel column chromatography (eluent: hexane) to afford **6e** as colorless oil (823.0 mg, 3.51 mmol, 35%, 2 steps).

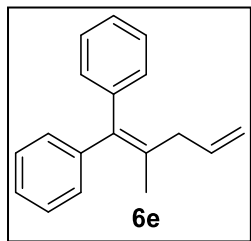

IR (neat)  $\tilde{\nu}$ : 2911, 1636, 1598, 1492, 1442, 1073, 992, 913, 766, 701 cm<sup>-1</sup>; <sup>1</sup>H NMR (500 MHz, CDCl<sub>3</sub>)  $\delta$ : 7.32-7.28 (m, 4H), 7.23-7.18 (m, 6H), 5.93-5.85 (m, 1H), 5.11-5.08 (m, 2H), 2.89 (d, *J* = 6.3 Hz, 2H), 1.81 (s, 3H) ppm; <sup>13</sup>C NMR (125 MHz, CDCl<sub>3</sub>)  $\delta$ : 143.1, 142.9, 138.6, 136.8, 132.4, 129.6, 129.3, 127.92, 127.89, 126.3, 126.2, 115.8, 40.1, 19.6 ppm; HRMS (EI) *m/z* calcd. for C<sub>18</sub>H<sub>18</sub> [M]<sup>+</sup>: 234.1409, found: 234.1413.

#### (C-1-d) Synthesis of 1,4-Diene **6f**<sup>30</sup>

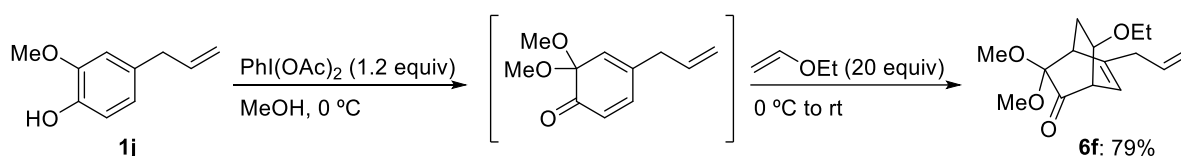

**5-Allyl-7-ethoxy-3,3-dimethoxybicyclo[2.2.2]oct-5-en-2-one (6f):** To a 500 mL recovery flask was placed PhI(OAc)<sub>2</sub> (7.73 g, 24 mmol, 1.2 equiv), which was dissolved in MeOH (200 mL) at 0 °C. Eugenol (3.28 g, 20 mmol, 1 equiv) was added dropwise to the solution, and the resulting yellowish mixture was stirred for 20 min at 0 °C. Afterwards, ethyl vinyl ether (28.8 g, 400 mmol, 20 equiv) was added in one portion and the mixture was stirred at rt for 22 h. The solvent and volatile materials were then evaporated, and the residue was dissolved in ethyl acetate, which was washed with sat. NaHCO<sub>3</sub> aq. followed by brine, and the organic layer was dried over Na<sub>2</sub>SO<sub>4</sub>. After the solids were filtered off, the solvent was removed under reduced pressure. The crude mixture was purified by Kugelrohr bulb-to-bulb distillation (*ca.* 1 mmHg, *ca.* 150 °C) to afford **6f** as yellow oil (4.22 g, 15.9 mmol, 79%).

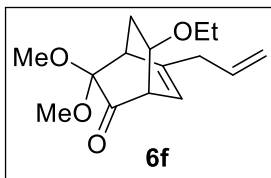

IR (neat)  $\tilde{\nu}$ : 2975, 1738, 1636, 1440, 1373, 1350 cm<sup>-1</sup>; <sup>1</sup>H NMR (500 MHz, CDCl<sub>3</sub>)  $\delta$ : 5.88-5.79 (m, 1H), 5.67 (d, *J* = 6.3 Hz, 1H), 5.15 (dd, *J* = 17.2, 1.7 Hz, 1H), 5.11 (dd, *J* = 10.9, 1.1 Hz, 1H), 3.96-3.93 (m, 1H), 3.50 (dq, *J* = 15.2, 7.0 Hz, 1H), 3.45 (dd, *J* = 6.3, 2.9 Hz, 1H), 3.39 (dq, *J* = 15.2, 7.0 Hz, 1H), 3.32 (s, 3H),

3.27 (s, 3H), 3.03-2.94 (m, 2H), 2.89 (dd,  $J = 4.5, 2.8$  Hz, 1H), 2.38 (ddd,  $J = 13.5, 8.3, 2.8$  Hz, 1H), 1.23 (dt,  $J = 13.5, 4.5, 3.5$  Hz, 1H), 1.16 (t,  $J = 7.0$  Hz) ppm;  $^{13}\text{C}$  NMR (125 MHz,  $\text{CDCl}_3$ )  $\delta$ : 146.7, 134.5, 117.3, 116.8, 94.0, 74.3, 64.2, 53.4, 50.5, 49.6, 41.4, 39.6, 30.4, 15.3 ppm; HRMS (ESI)  $m/z$  calcd. for  $\text{C}_{15}\text{H}_{22}\text{NaO}_4$   $[\text{M}+\text{Na}]^+$ : 289.1410, found: 289.1411.

## (C-2) General Procedure for Allylic C–H Carboxylation

### (C-2-a) Representative Procedure ~ Condition Screening

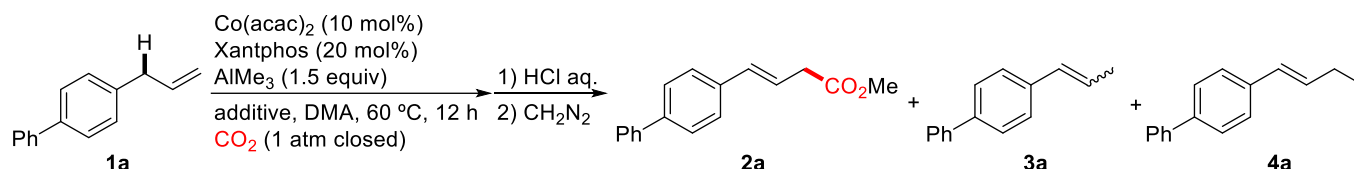

To an oven-dried 20 mL sealed tube were placed  $\text{Co}(\text{acac})_2$  (5.1 mg, 20  $\mu\text{mol}$ , 10 mol%) and Xantphos (23.1 mg, 40  $\mu\text{mol}$ , 20 mol%). (The additive was added inside an argon-filled glove box). The tube was evacuated and backfilled with  $\text{CO}_2$  (3 times) followed by the addition of DMA. The resulting mixture was stirred at room temperature until the materials dissolved completely. The solution was then cooled to 0 °C and stirred for 5 minutes before  $\text{AlMe}_3$  (2 M in toluene, 0.15 mL, 0.3 mmol, 1.5 equiv) was added. The resulting solution was stirred for another 1 minute, then the substrate **1a** (38.9 mg, 0.2 mmol, 1.0 equiv) was added. The tube was closed tightly and the mixture was stirred at 60 °C for 12 h. After cooling the mixture to 0 °C, the sealed tube was carefully opened and the reaction was quenched by 20 mL of 1 M HCl aq. and extracted with ethyl acetate (5 mL, 3 times). The combined organic layer was washed with brine (20 mL) and dried over  $\text{Na}_2\text{SO}_4$ . After the solids were filtered off, the solvent was removed under reduced pressure and the residue was then dried under vacuum. The crude mixture was dissolved in  $\text{Et}_2\text{O}$ , and the mixture was treated with excess  $\text{CH}_2\text{N}_2$  in  $\text{Et}_2\text{O}$ . After the mixture was stirred for at room temperature for 10 minutes, the solvent was evaporated and the residue was dried under vacuum. The yields of the corresponding ester **2a** and other products were determined by  $^1\text{H}$  NMR analysis using 1,3,5-trimethoxybenzene as an internal standard.

### (C-2-b) General Procedure ~ Substrate Scope

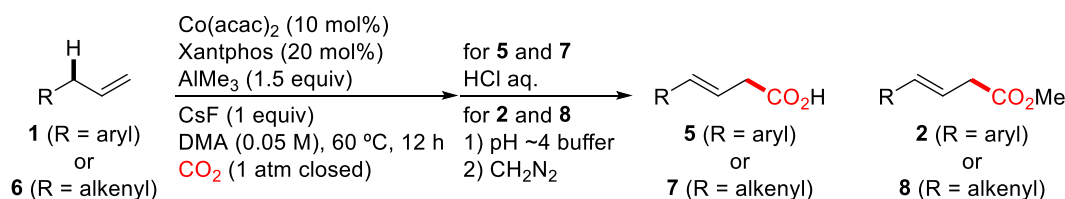

To an oven-dried 20 mL a vacuum tube sealed tube were placed  $\text{Co}(\text{acac})_2$  (10.3 mg, 40  $\mu\text{mol}$ , 10 mol%) and Xantphos (46.3 mg, 80  $\mu\text{mol}$ , 20 mol%). The tube was taken into an argon-filled glove box, and  $\text{CsF}$  (60.8 mg, 0.4 mmol, 1 equiv) was added. Outside the glove box, the tube was then evacuated and backfilled with  $\text{CO}_2$  (3 times) followed by the addition of DMA (8 mL). The resulting mixture was stirred at room temperature until the materials dissolved completely. The solution was cooled to 0 °C and stirred for 5 minutes before  $\text{AlMe}_3$  (2 M in toluene, 0.3 mL, 0.6 mmol, 1.5 equiv) was added. The dark green solution was stirred for another 1 minute, then a substrate **1** or **6** (0.4 mmol, 1.0 equiv) was added. The tube was closed tightly and the mixture was stirred at 60 °C for 12 h. After cooling the mixture to 0 °C, the sealed



tube was carefully opened and the reaction was quenched by 30 mL of 1 M HCl aq. and extracted with ethyl acetate (5 mL, 3 times). The combined organic layer was washed with brine (20 mL) and dried over Na<sub>2</sub>SO<sub>4</sub>. After the solids were filtered off, the solvent was removed under reduced pressure and the residue was dried under vacuum to afford the crude mixture, which was basically purified by silica-gel column chromatography (detail methods are described for each compounds).

**Methyl (*E*)-4-((1,1'-biphenyl)-4-yl)but-3-enoate (**2a**):** **1a** (38.9 mg, 0.2 mmol, 1 equiv) was subjected to

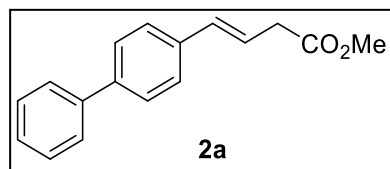

the reaction according to the procedure **C-2-a**. 1,3,5-trimethoxybenzene, which was used as an internal standard for determination of the yields by <sup>1</sup>H NMR analysis, was hard to remove in chromatographic purification. If it is not used, the crude mixture can be purified by silica-gel column

chromatography (eluent: hexane/ethyl acetate, 30:1) to afford **2a** as white solids.

mp. 97.0-98.0 °C; IR (neat)  $\tilde{\nu}$ : 2955, 1731, 1487, 1436, 1400, 1300, 1195, 1164, 971, 755, 683 cm<sup>-1</sup>; <sup>1</sup>H NMR (500 MHz, CDCl<sub>3</sub>)  $\delta$ : 7.60 (d, *J* = 8.0 Hz, 2H), 7.56 (d, *J* = 8.0 Hz, 2H), 7.46 (m, 4H), 7.34 (t, *J* = 7.4 Hz, 1H), 6.53 (d, *J* = 15.8 Hz, 1H), 6.35 (dt, *J* = 15.8, 7.3 Hz, 1H), 3.73 (s, 3H), 3.29 (d, *J* = 7.3 Hz, 2H) ppm; <sup>13</sup>C NMR (125 MHz, CDCl<sub>3</sub>)  $\delta$ : 172.0, 140.6, 140.3, 135.8, 133.0, 128.7, 127.3, 127.2, 126.9, 126.7, 121.7, 51.9, 38.3 ppm; HRMS (EI) *m/z* calcd. for C<sub>17</sub>H<sub>16</sub>O<sub>2</sub> [M]<sup>+</sup>: 252.1150, found: 252.1151.

**(*E*)-4-(-Prop-1-ene-1-yl)-1,1'-biphenyl (**3a**)**<sup>31</sup>: A mixture of **3a** and **4a**, which was obtained during the

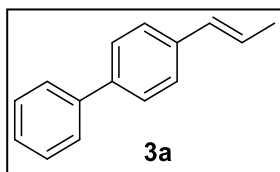

purification of **2a**, was separated by GPC (eluent: CHCl<sub>3</sub>) to afford *E*-**3a** as white solids.

<sup>1</sup>H NMR (500 MHz, CDCl<sub>3</sub>)  $\delta$ : 7.59 (d, *J* = 8.0 Hz, 2H), 7.53 (d, *J* = 8.0 Hz, 2H), 7.43 (dd, *J* = 8.3, 7.4 Hz, 2H), 7.40 (d, *J* = 8.3 Hz, 2H), 7.33 (t, *J* = 7.4 Hz, 1H), 6.44 (d, *J* = 16.0 Hz, 1H), 6.33-6.25 (m, 1H), 1.91 (dd, *J* = 6.6, 1.4 Hz, 3H) ppm.

**(*E*)-4-(But-1-ene-1-yl)-1,1'-biphenyl (**4a**):** Purification of the above mixture was purified by GPC (eluent:

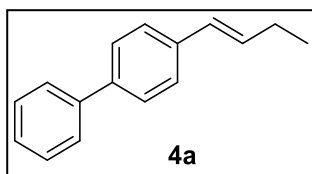

CHCl<sub>3</sub>), which provided **4a** as white solids.

mp. 109.0-110.0 °C; IR (neat)  $\tilde{\nu}$ : 3026, 2966, 1599, 1486, 967, 856, 697, 667 cm<sup>-1</sup>; <sup>1</sup>H NMR (500 MHz, CDCl<sub>3</sub>)  $\delta$ : 7.60 (d, *J* = 7.4 Hz, 2H), 7.54 (d, *J* = 8.6 Hz, 2H), 7.45-7.41 (m, 4H), 7.33 (t, *J* = 7.4 Hz, 1H), 6.42 (d, *J* = 15.9 Hz, 1H), 6.32 (dt, *J* = 15.9, 7.0 Hz, 1H), 2.23 (dq, *J* = 7.3, 7.0 Hz, 2H), 1.11 (t, *J* = 7.3 Hz, 3H) ppm; <sup>13</sup>C NMR (125 MHz, CDCl<sub>3</sub>)  $\delta$ : 140.9, 139.5, 137.0, 132.9, 128.7, 128.3, 127.2, 127.1, 126.9, 126.3, 26.1, 13.7 ppm; HRMS (EI) *m/z* calcd. for C<sub>16</sub>H<sub>16</sub> [M]<sup>+</sup>: 208.1252, found: 208.1256.

**(*E*)-4-((1,1'-Biphenyl)-4-yl)but-3-enoic acid (**5a**)**<sup>32</sup>: **1a** (77.8 mg, 0.4 mmol, 1 equiv) was subjected to the

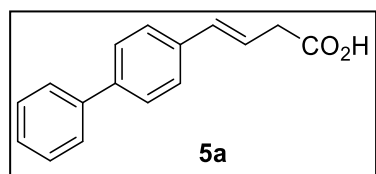

reaction according to the procedure **C-2-b**. The obtained crude material was dissolved in Et<sub>2</sub>O (10 mL) and extracted with 1 M NaOH aq. (2 mL, 3 times). The combined water layer was washed with Et<sub>2</sub>O (5 mL, 2 times), then acidified by conc. HCl. The resulting precipitates were collected by filtration,

and the solids were washed with water to afford **5a** as off-white solids (67.4 mg, 282.9  $\mu$ mol, 71%).

mp. 182.5-184.0 °C; IR (neat)  $\tilde{\nu}$ : 3033, 1708, 1406, 1243, 1092, 969, 849, 756 cm<sup>-1</sup>; <sup>1</sup>H NMR (500 MHz,

acetone-*d*<sub>6</sub>)  $\delta$ : 7.67 (d,  $J$  = 7.7 Hz, 2H), 7.64 (d,  $J$  = 7.7 Hz, 2H), 7.53 (d,  $J$  = 8.0 Hz, 2H), 7.45 (dd,  $J$  = 8.0, 7.4 Hz, 2H), 7.35 t,  $J$  = 7.4 Hz, 1H), 6.60 (d,  $J$  = 15.5 Hz, 1H), 6.44 (dt,  $J$  = 15.5, 7.2 Hz, 1H), 3.28 (d,  $J$  = 7.2 Hz, 2H) ppm; <sup>13</sup>C NMR (125 MHz, acetone-*d*<sub>6</sub>)  $\delta$ : 172.7, 141.4, 140.8, 137.3, 133.1, 129.7, 128.2, 127.9, 127.6, 127.5, 123.9, 38.4 ppm; HRMS (EI)  $m/z$  calcd. for C<sub>16</sub>H<sub>14</sub>O<sub>2</sub> [M]<sup>+</sup>: 238.0994, found: 238.0998.

**(*E*)-4-Phenylbut-3-enoic acid (5b)**<sup>33</sup>: **1b** (47.3 mg, 0.4 mmol, 1 equiv) was subjected to the reaction

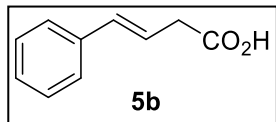

according to the procedure **C-2-b**. Purification of the crude product by silica-gel column chromatography (eluent: hexane/ethyl acetate, 4:1 to 3:1 with 1% AcOH) afforded **5b** as white solids containing a small amount of  $\alpha,\beta$ -unsaturated carboxylic acid (44.4 mg, 273.8  $\mu$ mol, 68% (the olefin isomer: 3%)).

mp. 82.5-84.0 °C; IR (neat)  $\tilde{\nu}$ : 2925, 1703, 1403, 1298, 1223, 1066, 975, 915, 744, 692 cm<sup>-1</sup>; <sup>1</sup>H NMR (500 MHz, CDCl<sub>3</sub>)  $\delta$ : 7.38 (d,  $J$  = 7.4 Hz, 2H), 7.32 (dd,  $J$  = 7.4, 7.1 Hz, 2H), 7.25 (t,  $J$  = 7.1 Hz, 1H), 6.53 (d,  $J$  = 15.8 Hz, 1H), 6.30 (dt,  $J$  = 15.8, 7.4 Hz, 1H), 3.31 (dd,  $J$  = 7.4, 1.1 Hz, 2H) ppm; <sup>13</sup>C NMR (125 MHz, CDCl<sub>3</sub>)  $\delta$ : 178.0, 136.6, 134.0, 128.5, 127.7, 126.3, 120.8, 38.0 ppm; HRMS (EI)  $m/z$  calcd. for C<sub>10</sub>H<sub>10</sub>O<sub>2</sub> [M]<sup>+</sup>: 162.0681, found: 162.0678.

**(*E*)-4-((1,1'-Biphenyl)-2-yl)but-3-enoic acid (5c)**: **1c** (77.8 mg, 0.4 mmol, 1 equiv) was subjected to the

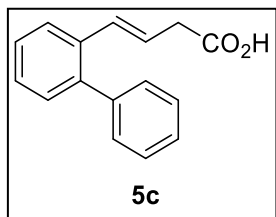

reaction according to the procedure **C-2-b**. Purification of the crude product by silica-gel column chromatography (eluent: hexane/ethyl acetate, 4:1 to 2:1 with 1% AcOH) afforded **5c** as white solids containing a small amount of  $\alpha,\beta$ -unsaturated carboxylic acid (60.0 mg, 251.8  $\mu$ mol, 63% (the olefin isomer: 2%)).

mp. 103.5-104.5 °C; IR (neat)  $\tilde{\nu}$ : 3024, 1696, 1475, 1410, 1300, 1218, 964, 749, 705 cm<sup>-1</sup>; <sup>1</sup>H NMR (500 MHz, CDCl<sub>3</sub>)  $\delta$ : 7.63-7.62 (m, 1H), 7.42 (dd,  $J$  = 7.5, 6.5 Hz, 2H), 7.37-7.31 (m, 5H), 7.29 (dddd,  $J$  = 7.8, 7.3, 3.0, 2.0 Hz, 1H), 6.51 (d,  $J$  = 15.9 Hz, 1H), 6.23 (dt,  $J$  = 15.9, 7.1 Hz, 1H), 3.21 (dd,  $J$  = 7.1, 1.1 Hz, 2H) ppm; <sup>13</sup>C NMR (125 MHz, CDCl<sub>3</sub>)  $\delta$ : 178.2, 140.74, 140.69, 134.7, 132.9, 130.1, 129.8, 128.0, 127.6, 127.5, 127.0, 126.0, 121.5, 38.1 ppm; HRMS (EI)  $m/z$  calcd. for C<sub>16</sub>H<sub>14</sub>O<sub>2</sub> [M]<sup>+</sup>: 238.0994, found: 238.0992.

**(*E*)-4-(Naphthalene-2-yl)but-3-enoic acid (5d)**<sup>34</sup>: **1d** (67.3 mg, 0.4 mmol, 1 equiv) was subjected to the

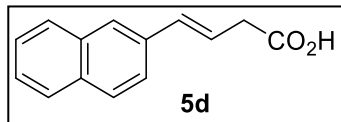

reaction according to the procedure **C-2-b**. The obtained crude material was dissolved in Et<sub>2</sub>O (10 mL) and extracted with 1 M NaOH aq. (2 mL, 3 times).

The combined water layer was washed with Et<sub>2</sub>O (5 mL, 2 times), then acidified by conc. HCl. The resulting precipitates were collected by filtration, and the solids were washed with water to afford **5d** as white solids (34.4 mg, 162.1  $\mu$ mol, 41%).

mp. 158.0-159.0 °C; IR (neat)  $\tilde{\nu}$ : 3048, 1720, 1418, 1401, 1295, 1222, 966, 862, 802, 740 cm<sup>-1</sup>; <sup>1</sup>H NMR (500 MHz, acetone-*d*<sub>6</sub>)  $\delta$ : 7.88-7.82 (m, 4H), 7.70 (dd,  $J$  = 8.6, 1.7 Hz, 1H), 7.50-7.44 (m, 2H), 6.73 (d,  $J$  = 15.9 Hz, 1H), 6.53 (dt,  $J$  = 15.9, 7.1 Hz, 1H), 3.32 (dd,  $J$  = 7.1, 1.4 Hz, 2H) ppm; <sup>13</sup>C NMR (125 MHz, acetone-*d*<sub>6</sub>)  $\delta$ : 172.7, 135.6, 134.7, 133.9, 133.6, 129.1, 128.8, 128.5, 127.2, 126.7, 124.3, 124.2, 124.1, 38.4 ppm; HRMS (EI)  $m/z$  calcd. for C<sub>14</sub>H<sub>12</sub>O<sub>2</sub> [M]<sup>+</sup>: 212.0837, found: 212.0831.

**(E)-4-(4-(Trifluoromethyl)phenyl)but-3-enoic acid (5e)**<sup>35</sup>: **1e** (74.5 mg, 0.4 mmol, 1 equiv) was subjected

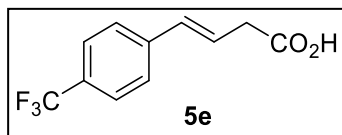

to the reaction according to the procedure **C-2-b**. Purification of the crude product by silica-gel column chromatography (eluent: hexane/ethyl acetate, 4:1 to 3:1 with 1% AcOH) afforded **5e** as white amorphous solids containing a small amount of  $\alpha,\beta$ -unsaturated carboxylic acid (60.4 mg, 262.4  $\mu$ mol, 65% (the olefin isomer: 1%)).

mp. 48.0-49.5 °C; IR (neat)  $\tilde{\nu}$ : 2925, 1713, 1614, 1416, 1324, 1172, 1121, 1065, 856, 809  $\text{cm}^{-1}$ ;  $^1\text{H}$  NMR (500 MHz,  $\text{CDCl}_3$ )  $\delta$ : 7.57 (d,  $J$  = 8.0 Hz, 2H), 7.47 (d,  $J$  = 8.0 Hz, 2H), 6.56 (d,  $J$  = 16.0 Hz, 1H), 6.39 (dt,  $J$  = 16.0, 7.3 Hz, 1H), 3.34 (d,  $J$  = 7.3 Hz, 2H) ppm;  $^{13}\text{C}$  NMR (125 MHz,  $\text{CDCl}_3$ )  $\delta$ : 177.5, 140.0, 132.7, 129.5 (q,  $J_{\text{CF}}$  = 32.2 Hz), 126.5, 125.5 (q,  $J_{\text{CF}}$  = 3.6 Hz), 124.1 (q,  $J_{\text{CF}}$  = 270.3 Hz), 123.6, 37.9 ppm; HRMS (EI)  $m/z$  calcd. for  $\text{C}_{11}\text{H}_9\text{F}_3\text{O}_2$   $[\text{M}]^+$ : 230.0555, found: 230.0562.

**(E)-4-(3,5-Bis(trifluoromethyl)phenyl)but-3-enoic acid (5f)**: **1f** (101.7 mg, 0.4 mmol, 1 equiv) was

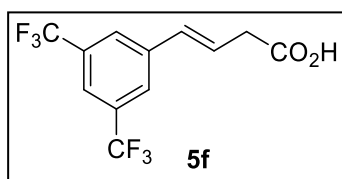

subjected to the reaction according to the procedure **C-2-b**. Purification of the crude product by silica-gel column chromatography (eluent: hexane/ethyl acetate, 10:1 to 4:1 with 1% AcOH) afforded **5f** as white solids (65.2 mg, 218.6  $\mu$ mol, 55%).

mp. 115.0-116.0 °C; IR (neat)  $\tilde{\nu}$ : 2919, 1711, 1422, 1410, 1380, 1342, 1288, 1232, 1176, 1124, 967, 897  $\text{cm}^{-1}$ ;  $^1\text{H}$  NMR (500 MHz,  $\text{CDCl}_3$ )  $\delta$ : 7.79 (s, 2H), 7.74 (s, 1H), 6.60 (d,  $J$  = 16.0 Hz, 1H), 6.47 (dt,  $J$  = 16.0, 7.2 Hz, 1H), 3.378 (d,  $J$  = 7.2 Hz, 2H) ppm;  $^{13}\text{C}$  NMR (125 MHz,  $\text{CDCl}_3$ )  $\delta$ : 177.1, 138.6, 132.2 (q,  $J_{\text{CF}}$  = 33.1 Hz), 131.4, 126.2 (app t,  $J_{\text{CF}}$  = 3.6 Hz), 125.2, 123.2 (q,  $J_{\text{CF}}$  = 275.1 Hz), 121.2 (app quin,  $J_{\text{CF}}$  = 3.5 Hz), 37.7 ppm; HRMS (EI)  $m/z$  calcd. for  $\text{C}_{12}\text{H}_8\text{F}_6\text{O}_2$   $[\text{M}]^+$ : 298.0429, found: 298.0427.

**(E)-4-(3-Methoxyphenyl)but-3-enoic acid (5g)**: **1g** (59.3 mg, 0.4 mmol, 1 equiv) was subjected to the

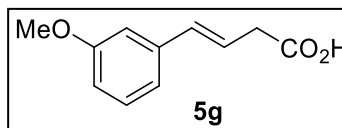

reaction according to the procedure **C-2-b**. Purification of the crude product by silica-gel column chromatography (eluent: hexane/ethyl acetate, 4:1 to 1:1 with 1% AcOH) afforded **5g** as white solids containing a small amount of  $\alpha,\beta$ -unsaturated carboxylic acid (60.1 mg, 312.7  $\mu$ mol, 78% (the olefin isomer: 4%)).

mp. 91.0-92.0 °C; IR (neat)  $\tilde{\nu}$ : 2898, 1696, 1604, 1578, 1492, 1429, 1389, 1344, 1264, 1220, 1150, 1038, 778  $\text{cm}^{-1}$ ;  $^1\text{H}$  NMR (500 MHz,  $\text{CDCl}_3$ )  $\delta$ : 7.23 (dd,  $J$  = 8.0, 7.8 Hz, 1H), 6.97 (d,  $J$  = 8.0 Hz, 1H), 6.91 (dd,  $J$  = 2.4, 1.5 Hz, 1H), 6.80 (dd,  $J$  = 7.8, 2.4 Hz, 1H), 6.50 (d,  $J$  = 15.9 Hz, 1H), 6.28 (dt,  $J$  = 15.9, 7.2 Hz, 1H), 3.82 (s, 3H), 3.30 (dd,  $J$  = 7.2, 1.4 Hz, 2H) ppm;  $^{13}\text{C}$  NMR (125 MHz,  $\text{CDCl}_3$ )  $\delta$ : 177.9, 159.8, 138.0, 133.9, 129.5, 121.1, 119.0, 113.4, 111.5, 55.2, 38.0 ppm; HRMS (EI)  $m/z$  calcd. for  $\text{C}_{11}\text{H}_{12}\text{O}_3$   $[\text{M}]^+$ : 192.0786, found: 192.0791.

**(E)-4-(2,5-Dimethoxyphenyl)but-3-enoic acid (5h)**<sup>36</sup>: **1h** (71.3 mg, 0.4 mmol, 1 equiv) was subjected to

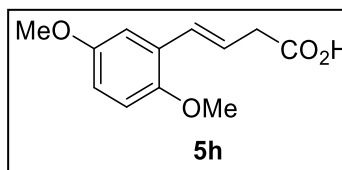

the reaction according to the procedure **C-2-b**. The crude material was dissolved in 1 M NaOH aq. (2 mL) and washed with  $\text{Et}_2\text{O}$  (5 mL, 2 times), then acidified by conc. HCl followed by extraction with ethyl acetate (3 mL, 3 times). The combined organic layer was washed with brine and dried over

$\text{Na}_2\text{SO}_4$ , which the solvent was removed under reduced pressure. The residue was passed through a pad of silica gel (eluent: hexane/ethyl acetate, 1:1) to afford **5h** as white solids containing a small amount of  $\alpha,\beta$ -

unsaturated carboxylic acid (72.1 mg, 324.3  $\mu$ mol, 81% (the olefin isomer: 11%)).

mp. 110.0-111.0  $^{\circ}$ C; IR (neat)  $\tilde{\nu}$ : 2912, 1713, 1496, 1416, 1386, 1317, 1287, 1219, 1043, 978, 912  $\text{cm}^{-1}$ ;  $^1\text{H}$  NMR (500 MHz,  $\text{CDCl}_3$ )  $\delta$ : 7.00 (d,  $J$  = 2.9 Hz, 1H), 6.83-6.76 (m, 3H), 6.29 (dt,  $J$  = 16.0, 7.2 Hz, 1H), 3.80 (s, 3H), 3.79 (s, 3H), 3.32 (d,  $J$  = 7.2 Hz, 2H) ppm;  $^{13}\text{C}$  NMR (125 MHz,  $\text{CDCl}_3$ )  $\delta$ : 178.0, 153.6, 151.0, 128.7, 126.5, 121.7, 113.9, 112.2, 112.1, 56.2, 55.7, 38.4 ppm; HRMS (EI)  $m/z$  calcd. for  $\text{C}_{12}\text{H}_{14}\text{O}_4$   $[\text{M}]^+$ : 222.0892, found: 222.0888.

**(*E*)-4-(Benzo[d][1,3]dioxol-5-yl)but-3-enoic acid (5i)**<sup>36</sup>: **1i** (64.9 mg, 0.4 mmol, 1 equiv) was subjected to

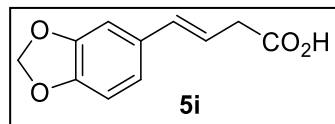

the reaction according to the procedure **C-2-b**. Purification of the crude product by silica-gel column chromatography (eluent: hexane/ethyl acetate, 4:1 to 2:1 with 1% AcOH) afforded **5i** as white solids containing a small amount of  $\alpha,\beta$ -unsaturated carboxylic acid (57.0 mg, 276.4  $\mu$ mol, 69% (the olefin isomer: 9%)).

mp. 113.5-114.5  $^{\circ}$ C; IR (neat)  $\tilde{\nu}$ : 2898, 1693, 1505, 1428, 1259, 1233, 1102, 1040, 970, 932, 788  $\text{cm}^{-1}$ ;  $^1\text{H}$  NMR (500 MHz,  $\text{CDCl}_3$ )  $\delta$ : 6.92 (d,  $J$  = 1.7 Hz, 1H), 6.80 (dd,  $J$  = 8.0, 1.7 Hz, 1H), 6.75 (d,  $J$  = 8.0 Hz, 1H), 6.42 (d,  $J$  = 15.9 Hz, 1H), 6.11 (dt,  $J$  = 15.9, 7.2 Hz, 1H), 5.95 (s, 2H), 3.27 (dd,  $J$  = 7.2, 1.4 Hz, 2H) ppm;  $^{13}\text{C}$  NMR (125 MHz,  $\text{CDCl}_3$ )  $\delta$ : 177.9, 148.0, 147.3, 133.5, 131.1, 121.0, 119.0, 108.2, 105.7, 101.1, 37.9 ppm; HRMS (EI)  $m/z$  calcd. for  $\text{C}_{11}\text{H}_{10}\text{O}_4$   $[\text{M}]^+$ : 206.0579, found: 206.0585.

**(*E*)-4-(4-Hydroxy-3-methoxyphenyl)but-3-enoic acid (5j)**: **1j** (65.7 mg, 0.4 mmol, 1 equiv) was

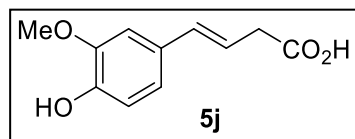

subjected to the reaction according to the procedure **C-2-b**. Purification of the crude product by silica-gel column chromatography (eluent: hexane/ethyl acetate, 4:1 to 1:1 with 1% AcOH) afforded **5j** as off-white solids (59.7 mg, 286.7  $\mu$ mol, 72%).

mp. 87.0-88.0  $^{\circ}$ C; IR (neat)  $\tilde{\nu}$ : 3507, 2943, 1695, 1600, 1514, 1401, 1275, 1233, 1151, 1028, 955, 798  $\text{cm}^{-1}$ ;  $^1\text{H}$  NMR (500 MHz,  $\text{CDCl}_3$ )  $\delta$ : 6.91 (s, 1H), 6.86 (m, 2H), 6.44 (d,  $J$  = 15.8 Hz, 1H), 6.12 (dt,  $J$  = 15.8, 7.5 Hz, 1H), 5.65 (br s, 1H), 3.91 (s, 3H), 3.28 (d,  $J$  = 7.5 Hz, 2H) ppm;  $^{13}\text{C}$  NMR (125 MHz,  $\text{CDCl}_3$ )  $\delta$ : 178.0, 146.6, 145.5, 133.8, 129.3, 120.2, 118.4, 114.4, 108.1, 55.9, 37.9 ppm; HRMS (EI)  $m/z$  calcd. for  $\text{C}_{11}\text{H}_{12}\text{O}_4$   $[\text{M}]^+$ : 208.0736, found: 208.0742.

**(*E*)-4-(4-(Piperidine-1-carbonyl)phenyl)but-3-enoic acid (5k)**: **1k** (91.7 mg, 0.4 mmol, 1 equiv) was

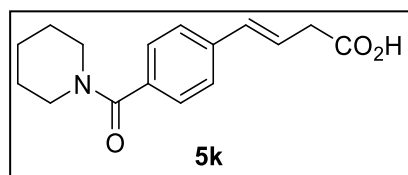

subjected to the reaction according to the procedure **C-2-b**. Purification of the crude product by silica-gel column chromatography (eluent: hexane/ethyl acetate, 4:1 to 1:1) afforded **5k** as white solids containing a small amount of  $\alpha,\beta$ -unsaturated carboxylic acid (58.8 mg, 215.1  $\mu$ mol,

54% (the olefin isomer: 2%)).

mp. 169.0-170.0  $^{\circ}$ C; IR (neat)  $\tilde{\nu}$ : 3159, 2940, 1715, 1599, 1451, 1394, 1287, 1175, 981, 853  $\text{cm}^{-1}$ ;  $^1\text{H}$  NMR (500 MHz,  $\text{CDCl}_3$ )  $\delta$ : 9.17 (br s, 1H), 7.36 (d,  $J$  = 8.0 Hz, 2H), 7.33 (d,  $J$  = 8.0 Hz, 2H), 6.46 (d,  $J$  = 16.0 Hz, 1H), 6.30 (dt,  $J$  = 16.0, 7.5 Hz, 1H), 3.70 (app br s, 2H), 3.34 (app br s, 2H), 3.24 (d,  $J$  = 7.5 Hz, 2H), 1.67 (app br s, 4H), 1.51 (app br s, 2H) ppm;  $^{13}\text{C}$  NMR (125 MHz,  $\text{CDCl}_3$ )  $\delta$ : 175.5, 170.5, 138.1, 134.8, 132.6, 127.2, 126.2, 123.0, 48.9, 43.3, 38.1, 26.4, 25.5, 24.5 ppm; HRMS (EI)  $m/z$  calcd. for  $\text{C}_{16}\text{H}_{18}\text{NO}_3$   $[\text{M}-\text{H}]^+$ : 272.1287, found: 272.1288.

**(*E*)-4-(4-(Methoxycarbonyl)phenyl)but-3-enoic acid (5l):** **1l** (70.5 mg, 0.4 mmol, 1 equiv) was subjected

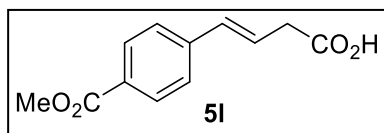

to the reaction according to the procedure **C-2-b**. Purification of the crude product by silica-gel column chromatography (eluent: hexane/ethyl acetate, 4:1 to 1:1 with 1% AcOH) to afford **5l** as white solids (55.5 mg, 252.0  $\mu$ mol, 63%).

mp. 125.0-126.0 °C; IR (neat)  $\tilde{\nu}$ : 2958, 1722, 1683, 1607, 1432, 1280, 1234, 1105, 974, 900, 759  $\text{cm}^{-1}$ ;  $^1\text{H}$  NMR (500 MHz,  $\text{CDCl}_3$ )  $\delta$ : 7.98 (ddd,  $J$  = 8.6, 2.0, 1.5 Hz, 2H), 7.43 (d,  $J$  = 8.6 Hz, 2H), 6.56 (d,  $J$  = 15.9 Hz, 1H), 6.41 (dt,  $J$  = 15.9, 7.1 Hz, 1H), 3.91 (s, 3H), 3.34 (dd,  $J$  = 7.1, 1.4 Hz, 2H) ppm;  $^{13}\text{C}$  NMR (125 MHz,  $\text{CDCl}_3$ )  $\delta$ : 177.1, 166.9, 141.0, 133.1, 129.9, 129.1, 126.2, 123.6, 52.1, 37.9 ppm; HRMS (EI)  $m/z$  calcd. for  $\text{C}_{12}\text{H}_{12}\text{O}_4$   $[\text{M}]^+$ : 220.0736, found: 220.0738.

**(*E*)-4-(4-Benzoylphenyl)but-3-enoic acid (5m):** **1m** (88.9 mg, 0.4 mmol, 1 equiv) was subjected to the

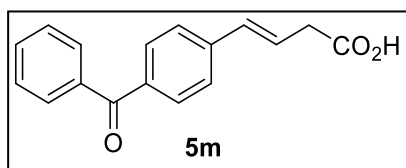

reaction according to the procedure **C-2-b**. The crude material was purified by silica-gel column chromatography (eluent: hexane/ethyl acetate, 4:1 to 1:1 with 1% AcOH) to afford **5m** as pale yellow solids containing a small amount of  $\alpha,\beta$ -unsaturated carboxylic acid (81.8 mg,

307.2  $\mu$ mol, 77% (the olefin isomer: 2%)).

mp. 99.0-100.0 °C; IR (neat)  $\tilde{\nu}$ : 2925, 1731, 1643, 1443, 1415, 1391, 1285, 1245, 1146, 962, 865, 693  $\text{cm}^{-1}$ ;  $^1\text{H}$  NMR (500 MHz,  $\text{CDCl}_3$ )  $\delta$ : 7.79 (m, 4H), 7.59 (t,  $J$  = 7.4 Hz, 1H), 7.50-7.47 (m, 4H), 6.59 (d,  $J$  = 15.8 Hz, 1H), 6.45 (dt,  $J$  = 15.8, 7.1 Hz, 1H), 3.36 (dd,  $J$  = 7.1, 1.4 Hz, 2H) ppm;  $^{13}\text{C}$  NMR (125 MHz,  $\text{CDCl}_3$ )  $\delta$ : 196.2, 177.1, 140.7, 137.7, 136.5, 133.1, 132.4, 130.6, 129.9, 128.3, 126.1, 123.8, 38.0 ppm; HRMS (EI)  $m/z$  calcd. for  $\text{C}_{17}\text{H}_{14}\text{O}_3$   $[\text{M}]^+$ : 266.0943, found: 266.0951.

**(*E*)-4-(1-Methyl-1*H*-indol-5-yl)but-3-enoic acid (5n):** **1n** (68.5 mg, 0.4 mmol, 1 equiv) was used as a

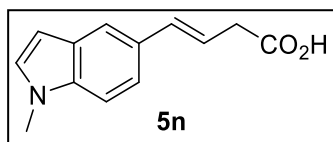

substrate for the reaction according to the procedure **C-2-b**. Purification of the crude product by silica-gel column chromatography (eluent: hexane/ethyl acetate, 4:1 to 2:1 with 1% AcOH) afforded **5n** as beige solids containing a small amount of  $\alpha,\beta$ -unsaturated carboxylic acid (72.5 mg, 336.7  $\mu$ mol, 84% (the olefin isomer: 8%)).

mp. 140.0-141.0 °C; IR (neat)  $\tilde{\nu}$ : 2926, 1719, 1613, 1510, 1420, 1301, 1214, 972, 897, 792, 712  $\text{cm}^{-1}$ ;  $^1\text{H}$  NMR (500 MHz,  $\text{CDCl}_3$ )  $\delta$ : 7.60 (s, 1H), 7.33 (dd,  $J$  = 8.8, 1.6 Hz, 1H), 7.26 (d,  $J$  = 8.8 Hz, 1H), 7.03 (d,  $J$  = 2.9 Hz, 1H), 6.64 (d,  $J$  = 15.9 Hz, 1H), 6.46 (d,  $J$  = 2.9 Hz, 1H), 6.23 (dt,  $J$  = 15.9, 7.2 Hz, 1H), 3.78 (s, 3H), 3.32 (dd,  $J$  = 7.2, 1.4 Hz, 2H) ppm;  $^{13}\text{C}$  NMR (125 MHz,  $\text{CDCl}_3$ )  $\delta$ : 178.1, 136.5, 135.1, 129.3, 128.6, 128.3, 119.9, 119.4, 117.6, 109.3, 101.3, 38.2, 32.9 ppm; HRMS (EI)  $m/z$  calcd. for  $\text{C}_{13}\text{H}_{13}\text{NO}_2$   $[\text{M}]^+$ : 215.0946, found: 215.0950.

**Methyl (*E*)-4-(quinolin-3-yl)but-3-enoate (2o):** **1o** (67.7 mg, 0.4 mmol, 1 equiv) was subjected to the

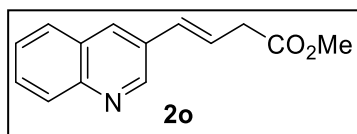

reaction according to the procedure **C-2-b**. The reaction was quenched by a buffer solution of citric acid/ $\text{NaHCO}_3$  (pH ~4, 10 mL), which was poured into a separatory funnel containing the same buffer (10 mL), and extracted with ethyl acetate (5 mL, 12 times). The combined organic layer was dried over  $\text{Na}_2\text{SO}_4$ , and the solids were filtered off. The solvent was then removed under reduced pressure, and the residue was diluted in  $\text{Et}_2\text{O}$ ,

which was treated with excess  $\text{CH}_2\text{N}_2$  in  $\text{Et}_2\text{O}$ . After stirring the mixture at room temperature for 10 minutes, the mixture was diluted in ethyl acetate (10 mL) and washed with brine (20 mL, 2 times). The organic layer was dried over  $\text{Na}_2\text{SO}_4$ , and the solids were filtered off. After the solvent was removed under reduced pressure, the residue was purified by silica-gel column chromatography (eluent: hexane/ethyl acetate, 5:1 to 3:2) to afford **2o** as pale yellow solids (53.5 mg, 250.9  $\mu\text{mol}$ , 63%).

mp. 85.0-86.0  $^\circ\text{C}$ ; IR (neat)  $\tilde{\nu}$ : 2953, 1728, 1572, 1493, 1438, 1290, 1202, 979, 810, 751  $\text{cm}^{-1}$ ;  $^1\text{H}$  NMR (500 MHz,  $\text{CDCl}_3$ )  $\delta$ : 8.98 (d,  $J = 1.7$  Hz, 1H), 8.07-8.05 (m, 2H), 7.79 ( $J = 8.0$  Hz, 1H), 7.67 (ddd,  $J = 7.5$ , 7.0, 1.1 Hz, 1H), 7.53 (ddd,  $J = 8.0$ , 7.0, 1.1 Hz, 1H), 6.65 (d,  $J = 16.0$  Hz, 1H), 6.54 (dt,  $J = 16.0$ , 6.9 Hz, 1H), 3.75 (s, 3H), 3.35 (dd,  $J = 6.9$ , 1.1 Hz, 2H) ppm;  $^{13}\text{C}$  NMR (125 MHz,  $\text{CDCl}_3$ )  $\delta$ : 171.8, 149.4, 147.7, 132.5, 130.5, 129.8, 129.39, 129.37, 128.1, 128.0, 127.1, 124.4, 52.2, 38.5 ppm; HRMS (EI)  $m/z$  calcd. for  $\text{C}_{14}\text{H}_{13}\text{NO}_2$   $[\text{M}]^+$ : 227.0946, found: 227.0941.

**(5E)-9-Ethoxy-6-methyl-9-oxonona-3,5-dienoic acid (7a, 3E/3Z = 90:10):** **6a** (72.9 mg, 0.4 mmol, 1

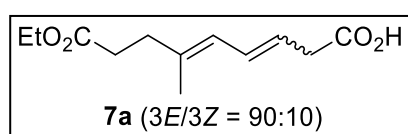

equiv) was subjected to the reaction according to the procedure **C-2-b**. Purification of the crude product by silica-gel column chromatography (eluent: hexane/ethyl acetate, 4:1 to 2:1) afforded a regioisomeric mixture of **7a** as colorless oil (68.1 mg, 301.0  $\mu\text{mol}$ , 75%).

IR (neat)  $\tilde{\nu}$ : 3185, 2982, 1732, 1713, 1374, 1161, 1043, 966, 757  $\text{cm}^{-1}$ ;  $^1\text{H}$  NMR (500 MHz,  $\text{CDCl}_3$ )  $\delta$ : 6.34 (dd,  $J = 15.3$ , 10.9 Hz, 1H), 6.01 (d,  $J = 11.3$  Hz, 0.1H, Z isomer), 5.84 (d,  $J = 10.9$  Hz, 0.9H, E isomer), 5.64 (dt,  $J = 15.3$ , 7.2 Hz, 0.9H, E isomer), 5.51 (dt,  $J = 11.3$ , 7.3 Hz, 0.1H, Z isomer), 4.12 (q,  $J = 7.2$  Hz, 2H), 3.25 (dd,  $J = 7.3$ , 1.1, 0.2 Hz, Z isomer), 3.16 (d,  $J = 7.2$  Hz, 1.8H, E isomer), 2.44-2.40 (m, 2H), 2.38-2.35 (m, 2H), 1.76 (s, 0.3H, Z isomer), 1.74 (s, 2.7H, E isomer), 1.24 (t,  $J = 7.2$  Hz, 3H) ppm;  $^{13}\text{C}$  NMR (125 MHz,  $\text{CDCl}_3$ )  $\delta$ : 177.9, 177.8, 173.2, 173.1, 139.3, 137.1, 130.5, 127.6, 124.4, 122.3, 119.7, 119.6, 60.44, 60.39, 37.9, 35.1, 34.7, 32.9, 32.8, 16.52, 16.48, 14.2 ppm; HRMS (EI)  $m/z$  calcd. for  $\text{C}_{12}\text{H}_{18}\text{O}_4$   $[\text{M}]^+$ : 226.1205, found: 226.1208.

**(3E)-9-Ethoxy-5-methyl-9-oxonona-3,5-dienoic acid (7b, 5E/5Z = 65:35):** **6b** ( $E/Z = 60:40$ , 72.9 mg, 0.4

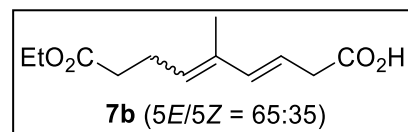

mmol, 1 equiv) was subjected to the reaction according to the procedure **C-2-b**. Purification of the crude product by silica-gel column chromatography (eluent: hexane/ethyl acetate, 4:1 to 2:1) afforded a regioisomeric mixture of **7b** as colorless oil (40.0 mg, 176.8  $\mu\text{mol}$ , 45%).

IR (neat)  $\tilde{\nu}$ : 3202, 2982, 1731, 1714, 1375, 1270, 1181, 1038, 967  $\text{cm}^{-1}$ ;  $^1\text{H}$  NMR (500 MHz,  $\text{CDCl}_3$ )  $\delta$ : 6.55 (d,  $J = 15.5$  Hz, 0.4H, Z isomer), 6.14 (d,  $J = 15.8$  Hz, 0.6H, E isomer), 5.75 (dt,  $J = 15.5$ , 7.2 Hz, 0.4H, Z isomer), 5.63 (dt,  $J = 15.8$ , 7.2 Hz, 0.6H, E isomer), 5.40 (t,  $J = 7.2$  Hz, 0.6H, E isomer), 5.30 (t,  $J = 7.4$  Hz, 0.4H, Z isomer), 4.12 (q,  $J = 7.2$  Hz, 2H), 3.21 (d,  $J = 7.2$  Hz, 0.8H, Z isomer), 3.15 (d,  $J = 7.2$  Hz, 1.2H, E isomer), 2.49-2.42 (m, 2H), 2.37-2.33 (m, 2H), 1.81 (s, 1H, Z isomer), 1.76 (s, 2H, E isomer), 1.24 (t,  $J = 7.2$  Hz, 3H) ppm;  $^{13}\text{C}$  NMR (125 MHz,  $\text{CDCl}_3$ )  $\delta$ : 178.1, 177.9, 173.15, 173.13, 138.5, 134.2, 132.5, 130.8, 130.3, 128.3, 121.1, 118.1, 60.4, 38.2, 37.8, 34.4, 34.0, 23.7, 22.9, 20.4, 14.2, 12.3 ppm; HRMS (EI)  $m/z$  calcd. for  $\text{C}_{12}\text{H}_{18}\text{O}_4$   $[\text{M}]^+$ : 226.1205, found: 226.1209.

**(3E)-9-Ethoxy-5,6-dimethyl-9-oxonona-3,5-dienoic acid (7c, 5E/5Z = 55:45):** **6c** (*E/Z* = 50:50, 78.5 mg,

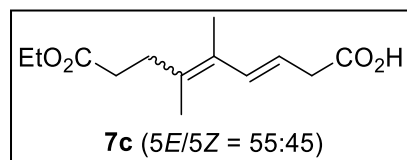

0.4 mmol, 1 equiv) was subjected to the reaction according to the procedure **C-2-b**. Purification of the crude product by silica-gel column chromatography (hexane/ethyl acetate, 4:1 to 2:1) afforded a regioisomeric mixture of **7c** as colorless oil (65.0 mg, 270.5  $\mu$ mol, 68%).

IR (neat)  $\tilde{\nu}$ : 3198, 2983, 1732, 1714, 1375, 1286, 1179, 1099, 1035, 962, 757  $\text{cm}^{-1}$ ;  $^1\text{H}$  NMR (500 MHz,  $\text{CDCl}_3$ )  $\delta$ : 6.59 (app dd,  $J$  = 15.5, 10.3 Hz, 1H), 5.67 (dt,  $J$  = 15.5, 7.5 Hz, 1H), 4.12 (app qd,  $J$  = 7.3, 2.4 Hz, 2H), 3.20 (d,  $J$  = 7.5 Hz, 2H), 2.51 (t,  $J$  = 8.0 Hz, 0.9H, *Z* isomer) 2.46 (t,  $J$  = 7.7 Hz, 1.1H, *E* isomer), 2.38-2.33 (m, 2H), 1.80 (s, 1.6H, *E* isomer), 1.79 (s, 1.6H, *E* isomer), 1.77 (s, 1.4H, *Z* isomer), 1.76 (s, 1.4H, *Z* isomer), 1.25 (td,  $J$  = 7.3, 2.4 Hz, 3H) ppm;  $^{13}\text{C}$  NMR (125 MHz,  $\text{CDCl}_3$ )  $\delta$ : 178.1, 173.3, 133.3, 132.9, 132.5, 127.3, 127.0, 119.1, 118.9, 60.4, 38.38, 38.35, 33.4, 32.8, 30.8, 29.4, 19.4, 18.0, 14.5, 14.2, 14.0 ppm; HRMS (EI)  $m/z$  calcd. for  $\text{C}_{13}\text{H}_{20}\text{O}_4$   $[\text{M}]^+$ : 240.1362, found: 240.1364.

**(E)-4-(1,2,3,6-Tetrahydro-(1,1'-biphenyl)-4-yl)but-3-enoic acid: 6d** (79.3 mg, 0.4 mmol, 1 equiv) was

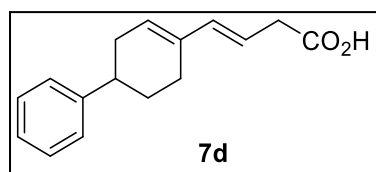

subjected to the reaction according to the procedure **C-2-b**. Purification of the crude product by silica-gel column chromatography (eluent: hexane/ethyl acetate, 2:1) afforded **7d** as white solids (76.0 mg, 313.6  $\mu$ mol, 78%).

mp. 104.0-105.0  $^{\circ}\text{C}$ ; IR (neat)  $\tilde{\nu}$ : 3084, 2920, 1715, 1651, 1493, 1433, 1391, 1276, 1032, 971, 702  $\text{cm}^{-1}$ ;  $^1\text{H}$  NMR (500 MHz,  $\text{CDCl}_3$ )  $\delta$ : 7.31 (dd,  $J$  = 8.0, 7.5 Hz, 2H), 7.24-7.19 (m, 3H), 6.21 (d,  $J$  = 15.5 Hz, 1H), 5.82 (d,  $J$  = 5.2 Hz, 1H), 5.67-5.61 (m, 1H), 3.19 (d,  $J$  = 6.9 Hz, 2H), 2.83-2.77 (m, 1H), 2.44-2.35 (m, 2H), 2.31-2.25 (m, 2H), 2.06-2.03 (m, 1H), 1.84-1.75 (m, 1H) ppm;  $^{13}\text{C}$  NMR (125 MHz,  $\text{CDCl}_3$ )  $\delta$ : 178.3, 146.7, 137.0, 134.9, 129.0, 128.4, 126.8, 126.1, 117.1, 40.1, 37.9, 33.9, 29.5, 25.0 ppm; HRMS (EI)  $m/z$  calcd. for  $\text{C}_{16}\text{H}_{18}\text{O}_2$   $[\text{M}]^+$ : 242.1307, found: 242.1312.

**(E)-5-Methyl-6,6-diphenylhexa-3,5-dienoic acid (7e): 6e** (93.7 mg, 0.4 mmol, 1 equiv) was subjected to

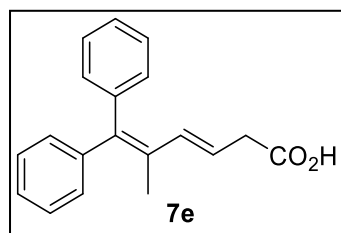

the reaction according to the procedure **C-2-b**. Purification of the crude product by silica-gel column chromatography (eluent: hexane/ethyl acetate, 4:1 to 2:1) afforded **7e** as pale yellow solids (63.5 mg, 228.1  $\mu$ mol, 57%).

mp. 135.5-136.0  $^{\circ}\text{C}$ ; IR (neat)  $\tilde{\nu}$ : 3053, 2918, 1709, 1597, 1491, 1442, 1285, 1074, 1019, 969, 701  $\text{cm}^{-1}$ ;  $^1\text{H}$  NMR (500 MHz,  $\text{CDCl}_3$ )  $\delta$ : 7.31-7.28 (m, 4H), 7.26-7.20 (m, 2H), 7.14-7.12 (m, 4H), 6.43 (d,  $J$  = 15.6 Hz, 1H), 5.87 (dt,  $J$  = 15.6, 7.3 Hz, 1H), 3.15 (dd,  $J$  = 7.3, 1.1 Hz, 2H), 1.95 (s, 3H) ppm;  $^{13}\text{C}$  NMR (125 MHz,  $\text{CDCl}_3$ )  $\delta$ : 177.3, 142.9, 142.1, 135.2, 130.6, 130.5, 129.9, 127.92, 127.90, 126.8, 126.7, 121.0, 38.1, 16.8 ppm; HRMS (EI)  $m/z$  calcd. for  $\text{C}_{19}\text{H}_{18}\text{O}_2$   $[\text{M}]^+$ : 278.1307, found: 278.1229.

**Methyl (E)-4-(8-ethoxy-6,6-dimethoxy-5-oxobicyclo[2.2.2]oct-2-en-2-yl)but-3-enoate (8f): 6f** (106.5

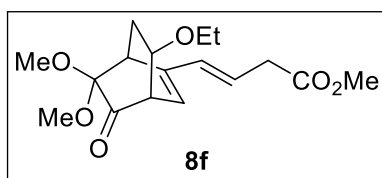

mg, 0.4 mmol, 1 equiv) was subjected to the reaction according to the procedure **C-2-b**. The reaction was quenched with pH ~4 buffer (citric acid/ $\text{NaHCO}_3$ ) and extracted with ethyl acetate (3 mL, 10 times). The crude mixture was once dried under vacuum (5 min), then treated with  $\text{CH}_2\text{N}_2$  in

Et<sub>2</sub>O. After concentration, the residue was purified by silica-gel column chromatography (eluent: hexane/ethyl acetate, 10:1 to 4:1) to afford **8f** as pale yellow oil (53.0 mg, 163.4 μmol, 41%).

IR (neat)  $\tilde{\nu}$ : 2976, 1739, 1437, 1352, 1250, 1201, 1165, 1102, 1050 cm<sup>-1</sup>; <sup>1</sup>H NMR (500 MHz, CDCl<sub>3</sub>)  $\delta$ : 6.23 (d,  $J$  = 16.0 Hz, 1H), 5.97 (dt,  $J$  = 16.0, 7.4 Hz, 1H), 5.88 (d,  $J$  = 6.3 Hz, 1H), 3.99 (ddd,  $J$  = 8.1, 3.5, 2.7 Hz, 1H), 3.69 (s, 3H), 3.54 (dq,  $J$  = 6.3, 2.7 Hz, 1H), 3.49 (dq,  $J$  = 9.0, 6.9 Hz, 1H), 3.42-3.35 (m, 2H), 3.31 (s, 3H), 3.30 (s, 3H), 3.24-3.15 (m, 2H), 2.46 (ddd,  $J$  = 13.7, 8.1, 3.2 Hz, 1H), 1.27 (ddd,  $J$  = 13.7, 3.5, 3.2 Hz, 1H), 1.14 (t,  $J$  = 6.9 Hz, 3H) ppm; <sup>13</sup>C NMR (125 MHz, CDCl<sub>3</sub>)  $\delta$ : 171.8, 143.8, 131.2, 121.6, 121.3, 93.4, 74.9, 64.3, 54.0, 51.9, 50.7, 49.8, 37.8, 37.6, 30.3, 15.3 ppm; HRMS (ESI)  $m/z$  calcd. for C<sub>17</sub>H<sub>24</sub>NaO<sub>6</sub> [M+Na]<sup>+</sup>: 347.1465, found: 347.1461.

### (C-3) Derivatization of the Carboxylated Products

#### (C-3-a) Iodolactonization of **5i**

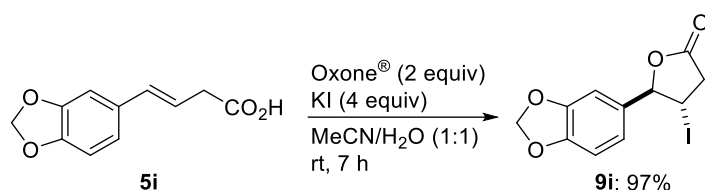

**anti-5-(Benzo[*d*][1,3]dioxol-5-yl)-4-iododihydrofuran-2(3*H*)-one (9i)**: To a 10 mL recovery flask was added Oxone<sup>®</sup> (245.8 mg, 0.4 mmol, 2.0 equiv) and KI (132.8 mg, 0.8 mmol, 4.0 equiv) under air, which was dissolved in MeCN/H<sub>2</sub>O (1:1, 2 mL) resulted in a brown suspension. To this mixture was added **5i** (41.2 mg, 0.2 mmol, 1.0 equiv) and stirred at ambient temperature for 7 h. Water (10 mL) was added and the reaction was quenched by the addition of Na<sub>2</sub>S<sub>2</sub>O<sub>3</sub> until the color of iodine disappeared. The mixture was extracted with ethyl acetate (3 mL, 2 times) and the combined organic layer was washed with brine, then dried over Na<sub>2</sub>SO<sub>4</sub>. After the solids were filtered off, the solvent was evaporated and the residue was purified by silica-gel column chromatography (eluent: hexane/ethyl acetate, 4:1) to afford *anti*-β-iodobutyrolactone **9i** as pale yellow waxy oil (64.6 mg, 194.5 μmol, 97%).

IR (neat)  $\tilde{\nu}$ : 2902, 1790, 1610, 1505, 1448, 1342, 1253, 1199, 1139, 1104, 1038, 979, 933, 813 cm<sup>-1</sup>; <sup>1</sup>H NMR (500 MHz, CDCl<sub>3</sub>)  $\delta$ : 6.90-9.86 (m, 2H), 6.82 (d,  $J$  = 8.0 Hz, 1H), 6.00 (s, 2H), 5.57 (d,  $J$  = 8.8 Hz, 1H), 4.20 (ddd,  $J$  = 9.6, 8.8, 7.9 Hz, 1H), 3.26 (dd,  $J$  = 17.9, 7.9 Hz, 1H), 3.02 (dd, 17.9, 9.6 Hz, 1H) ppm; <sup>13</sup>C NMR (125 MHz, CDCl<sub>3</sub>)  $\delta$ : 173.5, 148.6, 148.3, 129.0, 120.4, 108.5, 106.2, 101.5, 89.5, 41.0, 17.9 ppm; HRMS (EI)  $m/z$  calcd. for C<sub>11</sub>H<sub>9</sub>IO<sub>4</sub> [M]<sup>+</sup>: 331.9546, found: 331.9537.

#### (C-3-b) Tandem Olefin Epoxidation/Ring-Opening Lactonization

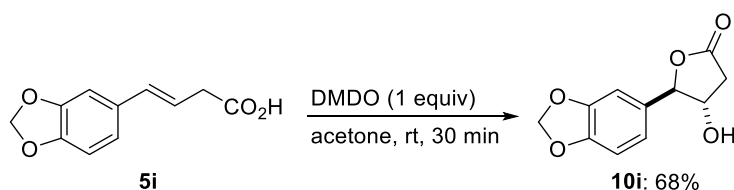



***anti*-5-(Benzo[*d*][1,3]dioxol-5-yl)-4-hydroxydihydrofuran-2(3*H*)-one (10i):** To a 10 mL recovery flask was added **5i** (20.6 mg, 0.1 mmol, 1 equiv) under air, which was dissolved in acetone (1 mL). To the solution was then added dimethyl dioxirane (DMDO) (*ca.* 0.05 M in acetone, 2 mL, *ca.* 0.1 mmol, *ca.* 1 equiv) by a pipette at ambient temperature. The resulting mixture was stirred for 30 min. and the solvent was removed under reduced pressure. The residue was purified by silica-gel column chromatography (eluent: hexane/ethyl acetate, 1:1) to afford *anti*-β-hydroxybutyrolactone **10i** as white solids (15.0 mg, 67.5 μmol, 68%).

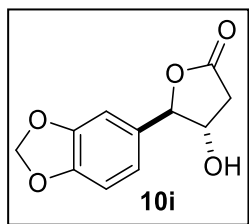

mp. 98.5-99.5 °C; IR (neat)  $\tilde{\nu}$ : 3512, 2945, 1772, 1503, 1257, 1173, 1038, 984, 868, 793  $\text{cm}^{-1}$ ;  $^1\text{H}$  NMR (500 MHz, acetone- $d_6$ )  $\delta$ : 6.89-6.86 (m, 3H), 6.02 (s, 2H), 5.23 (d,  $J$  = 4.0 Hz, 1H), 5.01 (d,  $J$  = 2.9 Hz, 1H), 4.47 (ddd,  $J$  = 8.4, 4.6, 4.0 Hz, 1H), 2.89 (dd,  $J$  = 17.5, 8.4 Hz, 1H), 2.49 (dd,  $J$  = 17.5, 4.6 Hz, 1H) ppm;  $^{13}\text{C}$  NMR (125 MHz, acetone- $d_6$ )  $\delta$ : 175.2, 149.0, 148.6, 132.8, 120.2, 109.0, 106.8, 102.3, 74.6, 37.5 ppm; HRMS (EI)  $m/z$  calcd. for  $\text{C}_{11}\text{H}_{10}\text{O}_5$   $[\text{M}]^+$ : 222.0528, found: 222.0526.

### (C-3-c) Sharpless Asymmetric Dihydroxylation of **5i** and *in situ* Lactonization

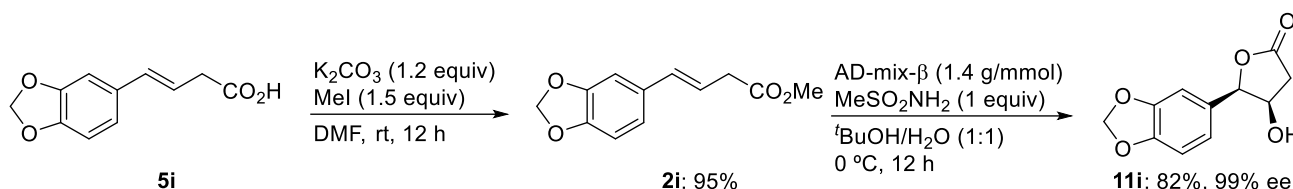

**Methyl (*E*)-4-(benzo[*d*][1,3]dioxol-5-yl)but-3-enoate (2i):** To a 10 mL recovery flask was added **5i** (433.0 mg, 2.1 mmol, 1.0 equiv) under air, which was diluted in DMF (2 mL). To this solution were added  $\text{K}_2\text{CO}_3$  (348.3 mg, 2.5 mmol, 1.2 equiv) and MeI (0.2 mL, 3.2 mmol, 1.5 equiv), and the resulting suspension was vigorously stirred at room temperature overnight. Water (20 mL) was added and extracted with ethyl acetate (3 mL, 3 times). The combined organic layer was washed with sat.  $\text{NaHCO}_3$  aq. and brine, then dried over  $\text{Na}_2\text{SO}_4$ . After the solids were filtered off, the solvent was removed under reduced pressure, and the crude mixture was purified by silica-gel column chromatography (eluent: hexane/ethyl acetate, 10:1 to 4:1) to afford the methyl ester **2i** as colorless oil (439.3 mg, 1.99 mmol, 95%).

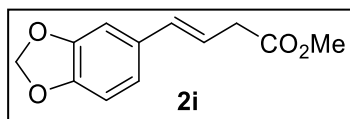

IR (neat)  $\tilde{\nu}$ : 2952, 2898, 1737, 1504, 1491, 1446, 1251, 1199, 1166, 1039, 934  $\text{cm}^{-1}$ ;  $^1\text{H}$  NMR (500 MHz,  $\text{CDCl}_3$ )  $\delta$ : 6.92 (d,  $J$  = 1.4 Hz, 1H), 6.78 (dd,  $J$  = 8.0, 1.4 Hz, 1H), 6.74 (d,  $J$  = 8.0 Hz, 1H), 6.39 (d,  $J$  = 15.7 Hz, 1H), 6.11 (dt,  $J$  = 15.7, 7.3 Hz, 1H), 5.94 (s, 2H), 3.71 (s, 3H), 3.21 (dd,  $J$  = 7.3, 1.1 Hz, 2H) ppm;  $^{13}\text{C}$  NMR (125 MHz,  $\text{CDCl}_3$ )  $\delta$ : 172.1, 148.0, 147.2, 133.0, 131.3, 120.9, 119.8, 108.2, 105.6, 101.0, 51.9, 38.1 ppm; HRMS (EI)  $m/z$  calcd. for  $\text{C}_{12}\text{H}_{12}\text{O}_4$   $[\text{M}]^+$ : 220.0736, found: 220.0734.

**(4*R*,5*R*)-5-(Benzo[*d*][1,3]dioxol-5-yl)-4-iododihydrofuran-2(3*H*)-one (11i):** To a 10 mL recovery flask was added  $\text{MeSO}_2\text{NH}_2$  (19.2 mg, 0.2 mmol, 1.0 equiv) under air, which was dissolved in  $t\text{BuOH}/\text{H}_2\text{O}$  (1:1, 2 mL). To the mixture were added **2i** (44.0 mg, 0.2 mmol, 1.0 equiv) and AD-mix-β (240 mg, *ca.* 4 mol%  $\text{K}_2\text{OsO}_4 \cdot 2\text{H}_2\text{O}$ , *ca.* 10 mol%  $(\text{DHQD})_2\text{PHAL}$ , 3.0 equiv  $\text{K}_3\text{Fe}(\text{CN})_6$ , and 3.0 equiv  $\text{K}_2\text{CO}_3$ ) at 0 °C. The resulting orange suspension was stirred at 0 °C for 20 h. The reaction was quenched by  $\text{Na}_2\text{S}_2\text{O}_3$

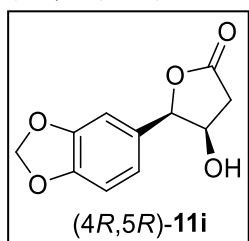

(316.2 mg, 2 mmol, 10 equiv) and stirred at ambient temperature for 1 h. Water (10 mL) was added and the mixture was extracted with ethyl acetate (3 mL, 2 times) and the combined organic layer was washed with brine, then dried over Na<sub>2</sub>SO<sub>4</sub>. After the solids were filtered off, the solvent was evaporated and the crude mixture was purified by silica-gel column chromatography (eluent: hexane/ethyl acetate, 1:1) to afford *syn*-β-hydroxybutyrolactone **11i** as white solids (35.7 mg, 160.1 μmol, 80%, 99% ee).

mp. 88.0-89.0 °C;  $[\alpha]_D^{24}$  -13.3 (c 0.17, MeOH); IR (neat)  $\tilde{\nu}$ : 3453, 2921, 1769, 1505, 1447, 1325, 1257, 1159, 1077, 1037, 931, 787 cm<sup>-1</sup>; <sup>1</sup>H NMR (500 MHz, CDCl<sub>3</sub>)  $\delta$ : 6.89-6.84 (m, 3H), 6.01 (s, 2H), 5.43 (d, *J* = 3.7 Hz, 1H), 5.43 (dd, *J* = 4.6, 3.7 Hz, 1H), 2.87 (dd, *J* = 17.8, 4.6 Hz, 1H), 2.74 (d, *J* = 17.8 Hz, 1H), 1.42 (s, 1H) ppm; <sup>13</sup>C NMR (125 MHz, CDCl<sub>3</sub>)  $\delta$ : 175.4, 148.2, 148.1, 126.6, 119.8, 108.6, 107.0, 101.4, 84.9, 70.2, 38.4 ppm; HRMS (EI) *m/z* calcd. for C<sub>11</sub>H<sub>10</sub>O<sub>5</sub> [M]<sup>+</sup>: 222.0528, found: 222.0530. The enantiomeric excess was determined by HPLC analysis (DAICEL CHIRALPAK IA-3, eluent: hexane/2-propanol = 90/10, flow rate: 1.0 mL/min. detector: UV at 290 nm), *t*<sub>R</sub> = 21.9 min (minor), 34.4 min (major). The absolute configuration was elucidated to be 4*R*,5*R* according to the Sharpless's original report (Scheme S3).<sup>37</sup>

### (C-3-d) Sharpless Asymmetric Dihydroxylation of **5h** and *in situ* Lactonization

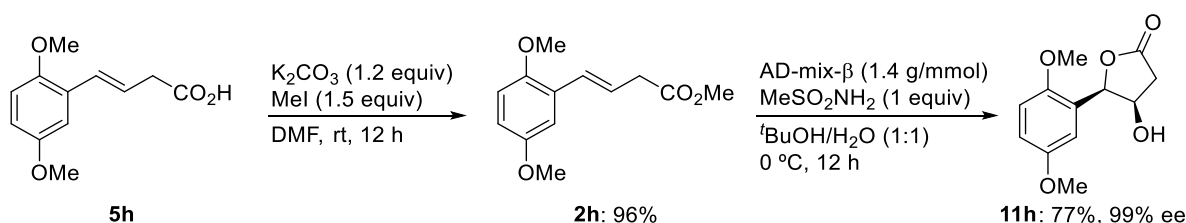

**Methyl (E)-4-(2,5-dimethoxyphenyl)but-3-enoate (2h)**: To a 500 mL flask was added **5h** (19.6 g, 88.3 mmol, 1.0 equiv) under air, which was diluted in DMF (200 mL). To this solution were added K<sub>2</sub>CO<sub>3</sub> (12.2 g, 88.3 mmol, 1.0 equiv) and MeI (6.6 mL, 106.0 mmol, 1.2 equiv), and the resulting suspension was vigorously stirred at room temperature overnight. Water (100 mL) was added and extracted with ethyl acetate (100 mL, 3 times). The combined organic layer was washed with brine, then dried over Na<sub>2</sub>SO<sub>4</sub>. After the solids were filtered off, and the crude mixture was distilled under reduced pressure (bp. 230 °C/10 mmHg) to afford the product, which was purified by silica-gel column chromatography (eluent: hexane/ethyl acetate, 2:1) to afford the methyl ester **2h** as yellow oil (19.9 mg, 84.4 mmol, 96%). The spectrum data was consistent with the reported one.<sup>38,39</sup>

**(4*R*,5*R*)-5-(2,5-Dimethoxyphenyl)-4-hydroxydihydrofuran-2(3*H*)-one (11h)**: To a 5 mL recovery flask was added **2h** (47.3 mg, 0.2 mmol, 1.0 equiv) under air, which was dissolved in *t*BuOH/H<sub>2</sub>O (1:1, 2 mL). To the mixture were added MeSO<sub>2</sub>NH<sub>2</sub> (19.2 mg, 0.2 mmol, 1.0 equiv) and AD-mix-β (240 mg, *ca.* 4 mol% K<sub>2</sub>OsO<sub>4</sub>·2H<sub>2</sub>O, *ca.* 10 mol% (DHQD)<sub>2</sub>PHAL, 3.0 equiv K<sub>3</sub>Fe(CN)<sub>6</sub>, and 3.0 equiv K<sub>2</sub>CO<sub>3</sub>) at 0 °C. The resulting orange suspension was stirred at 0 °C for 12 h. The reaction was quenched by Na<sub>2</sub>S<sub>2</sub>O<sub>3</sub>·5H<sub>2</sub>O (496.3 mg, 2 mmol, 10 equiv) and stirred at ambient temperature for 1 h. Water (10 mL) was added and the mixture was extracted with ethyl acetate (3 mL, 2 times) and the combined organic layer was washed with brine, then dried over Na<sub>2</sub>SO<sub>4</sub>. After the solids were filtered off, the solvent was evaporated and the crude

mixture was purified by silica-gel column chromatography (eluent: hexane/ethyl acetate, 1:1) to afford *syn*- $\beta$ -hydroxybutyrolactone **11h** as pale yellow oil (36.7 mg, 154.0  $\mu$ mol, 77%, 99% ee). The enantiomeric excess was determined by HPLC analysis (DAICEL CHIRALPAK IA-3, eluent: hexane/2-propanol = 90/10, flow rate: 1.0 mL/min. detector: UV at 290 nm),  $t_R$  = 15.9 min (minor), 19.5 min (major). The spectrum data was consistent with the reported one.<sup>38,39</sup> The absolute configuration was determined to be 4*R*,5*R* based on the comparison of the optical rotation with the reported one.  $[\alpha]_D^{20}$  -46.5 ( $c$  1.00, CHCl<sub>3</sub>). [lit.  $[\alpha]_D^{20}$  -40 ( $c$  1.05, CHCl<sub>3</sub> for 4*R*,5*R* enantiomer),<sup>39</sup> lit.  $[\alpha]_D^{18}$  +47.3 ( $c$  1.05, CHCl<sub>3</sub>) for 4*S*,5*S* enantiomer<sup>38</sup>].

Lactone **11h** was converted into tricyclic lactone **12h** by Oxa-Pictet-Spengler cyclization using 3-phenylpropanal and BF<sub>3</sub>·OEt<sub>2</sub>. The following oxidation afforded tricyclic quinone **13h**.<sup>39</sup>

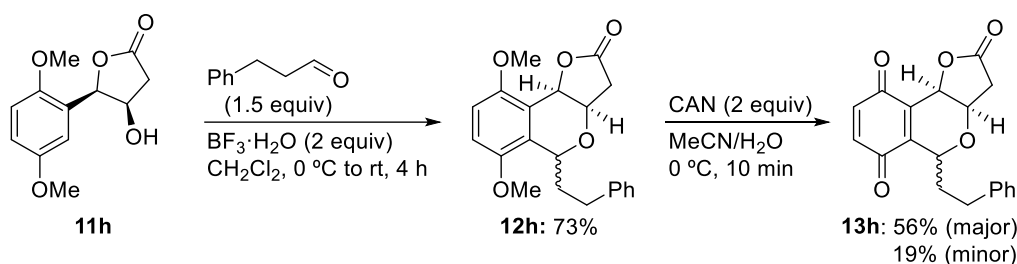

## (D) References

- [1] Newcomb, M.; Horner, J. H.; Whitted, P. O.; Crich, D.; Huang, X.; Yao, Q.; Zipse, H. *J. Am. Chem. Soc.* **1999**, *121*, 10685.
- [2] Chagarovskiy, A. O.; Ivanova, O. A.; Rakhmankulov, E. R.; Budynina, E. M.; Trushkov, I. V.; Melnikov, M. Y. *Adv. Synth. Catal.* **2010**, *352*, 3179.
- [3] For deprotonation of 1,4-pentadiene and 1,4-hexadiene using <sup>n</sup>BuLi/KO<sup>t</sup>Bu and/or <sup>s</sup>BuLi followed by carboxylation with CO<sub>2</sub>, see: Schlosser, M.; Zellner, A.; Leroux, F. *Synthesis* **2001**, *2001*, 1830.
- [4] Michels, G. D.; Svec, H. J. *Inorg. Chem.* **1981**, *20*, 3445.
- [5] Wakatsuki, Y.; Yamazaki, H. *Inorg. Synth.* **1989**, *26*, 190.
- [6] Pillai, S. M.; Tembe, G. L.; Ravindranathan, M. *J. Mol. Catal.* **1990**, *58*, 171.
- [7] Bailes, R. H.; Calvin, M. *J. Am. Chem. Soc.* **1947**, *69*, 1886.
- [8] Yoshino, T.; Ikemoto, H.; Matsunaga, S.; Kanai, M. *Angew. Chem., Int. Ed.* **2013**, *52*, 2207.
- [9] Giordano, G.; Crabtree, R. H. *Inorg. Synth.* **1990**, *28*, 83.
- [10] Collins, J. E.; Castellani, M. P.; Rheingold, A. L.; Miller, E. J.; Geiger, W. E.; Rieger, A. L.; Rieger, P. H. *Organometallics* **1995**, *14*, 1232.
- [11] Herde, J. L.; Lambert, J. C.; Senoff, C. V. *Inorg. Synth.* **1974**, *15*, 18.
- [12] Ireland, B. J.; Wheaton, C. A.; Hayes P. G. *Organometallics* **2010**, *29*, 1079.
- [13] Sawamura, M.; Hamashima, H.; Ito, Y. *Tetrahedron: Asymmetry* **1991**, *2*, 593.
- [14] Tang, P.; Wang, W.; Ritter, T. *J. Am. Chem. Soc.* **2011**, *133*, 11482.
- [15] Johns, A. M.; Sakai, N.; Ridder, A.; Hartwig, J. F. *J. Am. Chem. Soc.* **2006**, *128*, 9306.
- [16] Semba, K.; Fujihara, T.; Terao, J.; Tsuji, Y. *Chem. - Eur. J.* **2012**, *18*, 4179.

- [17] Taber, D. A.; DeMatteo, P. W.; Hassan, R. A. *Org. Synth.* **2013**, *90*, 350.
- [18] Lin, S.; Song, C.-X.; Cai, G.-X.; Wang, W.-H.; Shi, Z.-J. *J. Am. Chem. Soc.* **2008**, *130*, 12901.
- [19] Jayanth, T. T.; Jeganmohan, M.; Cheng, C.-H. *Org. Lett.* **2005**, *7*, 2921.
- [20] Denmark, S. E.; Werner, N. S. *J. Am. Chem. Soc.* **2008**, *130*, 16382.
- [21] Seomoon, D.; Lee, K.; Kim, H.; Li, P. H. *Chem. - Eur. J.* **2007**, *13*, 5197.
- [22] Dayaker, G.; Chevallier, F.; Gros, P. C.; Mongin, F. *Tetrahedron* **2010**, *66*, 8904.
- [23] Yamamoto, Y.; Takada, S.; Miyaura, N.; Iyama, T.; Tachikawa, H. *Organometallics* **2008**, *28*, 152.
- [24] Uchiyama, M.; Furuyama, T.; Kobayashi, M.; Matsumoto, Y.; Tanaka, K. *J. Am. Chem. Soc.* **2006**, *128*, 8404.
- [25] Kutturuff, C. A.; Zipse, H.; Trauner, D. *Angew. Chem., Int. Ed.* **2011**, *50*, 1402.
- [26] Scott, W. J.; Crisp, G. T.; Stille, J. K. *J. Am. Chem. Soc.* **1984**, *106*, 4630.
- [27] Das, S.; Addis, D.; Zhou, S.; Junge, K.; Beller, M. *J. Am. Chem. Soc.* **2010**, *132*, 1770.
- [28] Yokoyama, Y.; Tanaka, T.; Yamane, T.; Kurita, Y. *Chem. Lett.* **1991**, *7*, 1125.
- [29] Nogi, K.; Fujihara, T.; Terao, J.; Tsuji, Y. *J. Org. Chem.* **2015**, *80*, 11618.
- [30] Gao, S.-Y.; Ko, S.; Lin, Y.-L.; Peddinti, R. K.; Liao, C.-C. *Tetrahedron* **2001**, *57*, 297.
- [31] Stieber, F.; Grether, U.; Waldmann, H. *Chem. - Eur. J.* **2003**, *9*, 3270.
- [32] Ohkoshi, M.; Michinishi, J.; Hara, S.; Senboku, H. *Tetrahedron* **2010**, *66*, 7732.
- [33] This compound is commercially available from Sigma-Aldrich Co. LLC.
- [34] Browne, D. M.; Niyomura, O.; Wirth, T. *Org. Lett.* **2007**, *9*, 3169.
- [35] Thibonnet, J.; Abarbri, M.; Parrain, J.-L.; Duchêne, A. *Tetrahedron* **2003**, *59*, 4433.
- [36] Giles, R. G. F.; Rickard, S. R. W.; Senanayake, B. S. *J. Chem. Soc. Perkin Trans. 1*, **1998**, 3949.
- [37] Wang, Z.-M.; Zhang, X.-L.; Sharpless, K. B.; Sinha, S. C.; Sinha-Bagchi, A.; Keinan, E. *Tetrahedron Lett.* **1992**, *33*, 6407.
- [38] Bartholomäus, R.; Bachmann, J.; Mang, C.; Haustedt, L. O.; Harms, K.; Koert, U. *Eur. J. Org. Chem.* **2013**, *2013*, 180.
- [39] Jiang, X.; Wang, M.; Song, S.; Xu, Y.; Miao, Z.; Zhang, A. *RSC Adv.* **2015**, *5*, 27502.

500 MHz, CDCl<sub>3</sub>

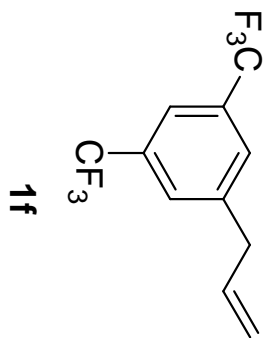

|       |  |
|-------|--|
| 7.733 |  |
| 7.642 |  |
| 7.260 |  |
| 5.990 |  |
| 5.976 |  |
| 5.971 |  |
| 5.964 |  |
| 5.957 |  |
| 5.943 |  |
| 5.936 |  |
| 5.929 |  |
| 5.922 |  |
| 5.910 |  |
| 5.209 |  |
| 5.191 |  |
| 5.171 |  |
| 5.138 |  |
| 3.527 |  |
| 3.513 |  |

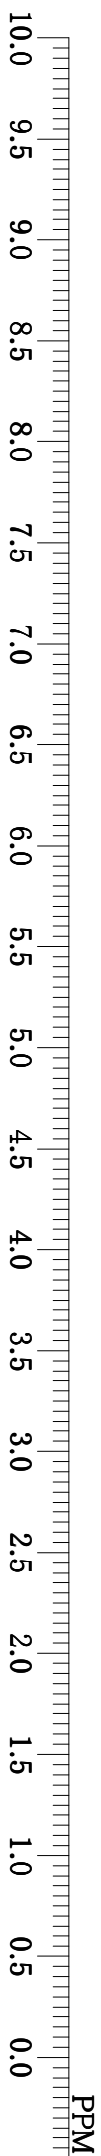

125 MHz, CDCl<sub>3</sub>

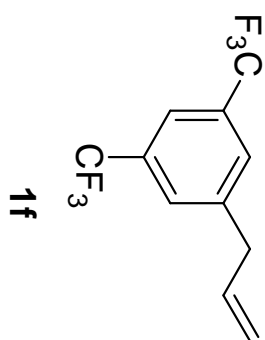

|         |
|---------|
| 142.481 |
| 135.174 |
| 135.155 |
| 132.074 |
| 131.807 |
| 131.540 |
| 131.283 |
| 128.793 |
| 128.764 |
| 126.676 |
| 124.510 |
| 122.345 |
| 120.323 |
| 120.294 |
| 120.256 |
| 120.228 |
| 120.199 |
| 120.180 |
| 117.872 |
| 117.843 |
| 117.814 |

77.000

39.648

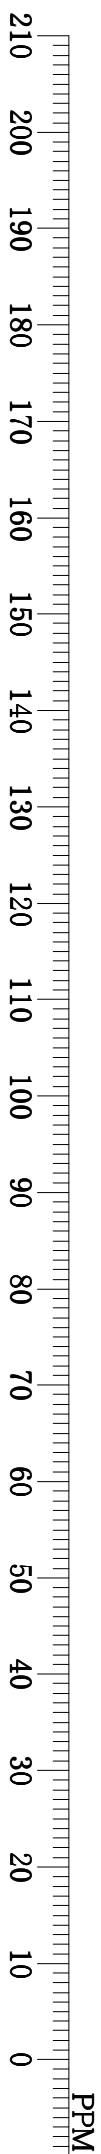

500 MHz, CDCl<sub>3</sub>

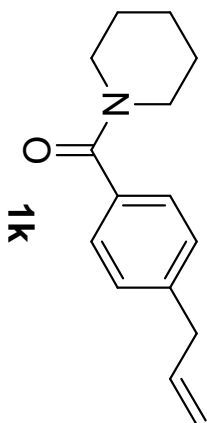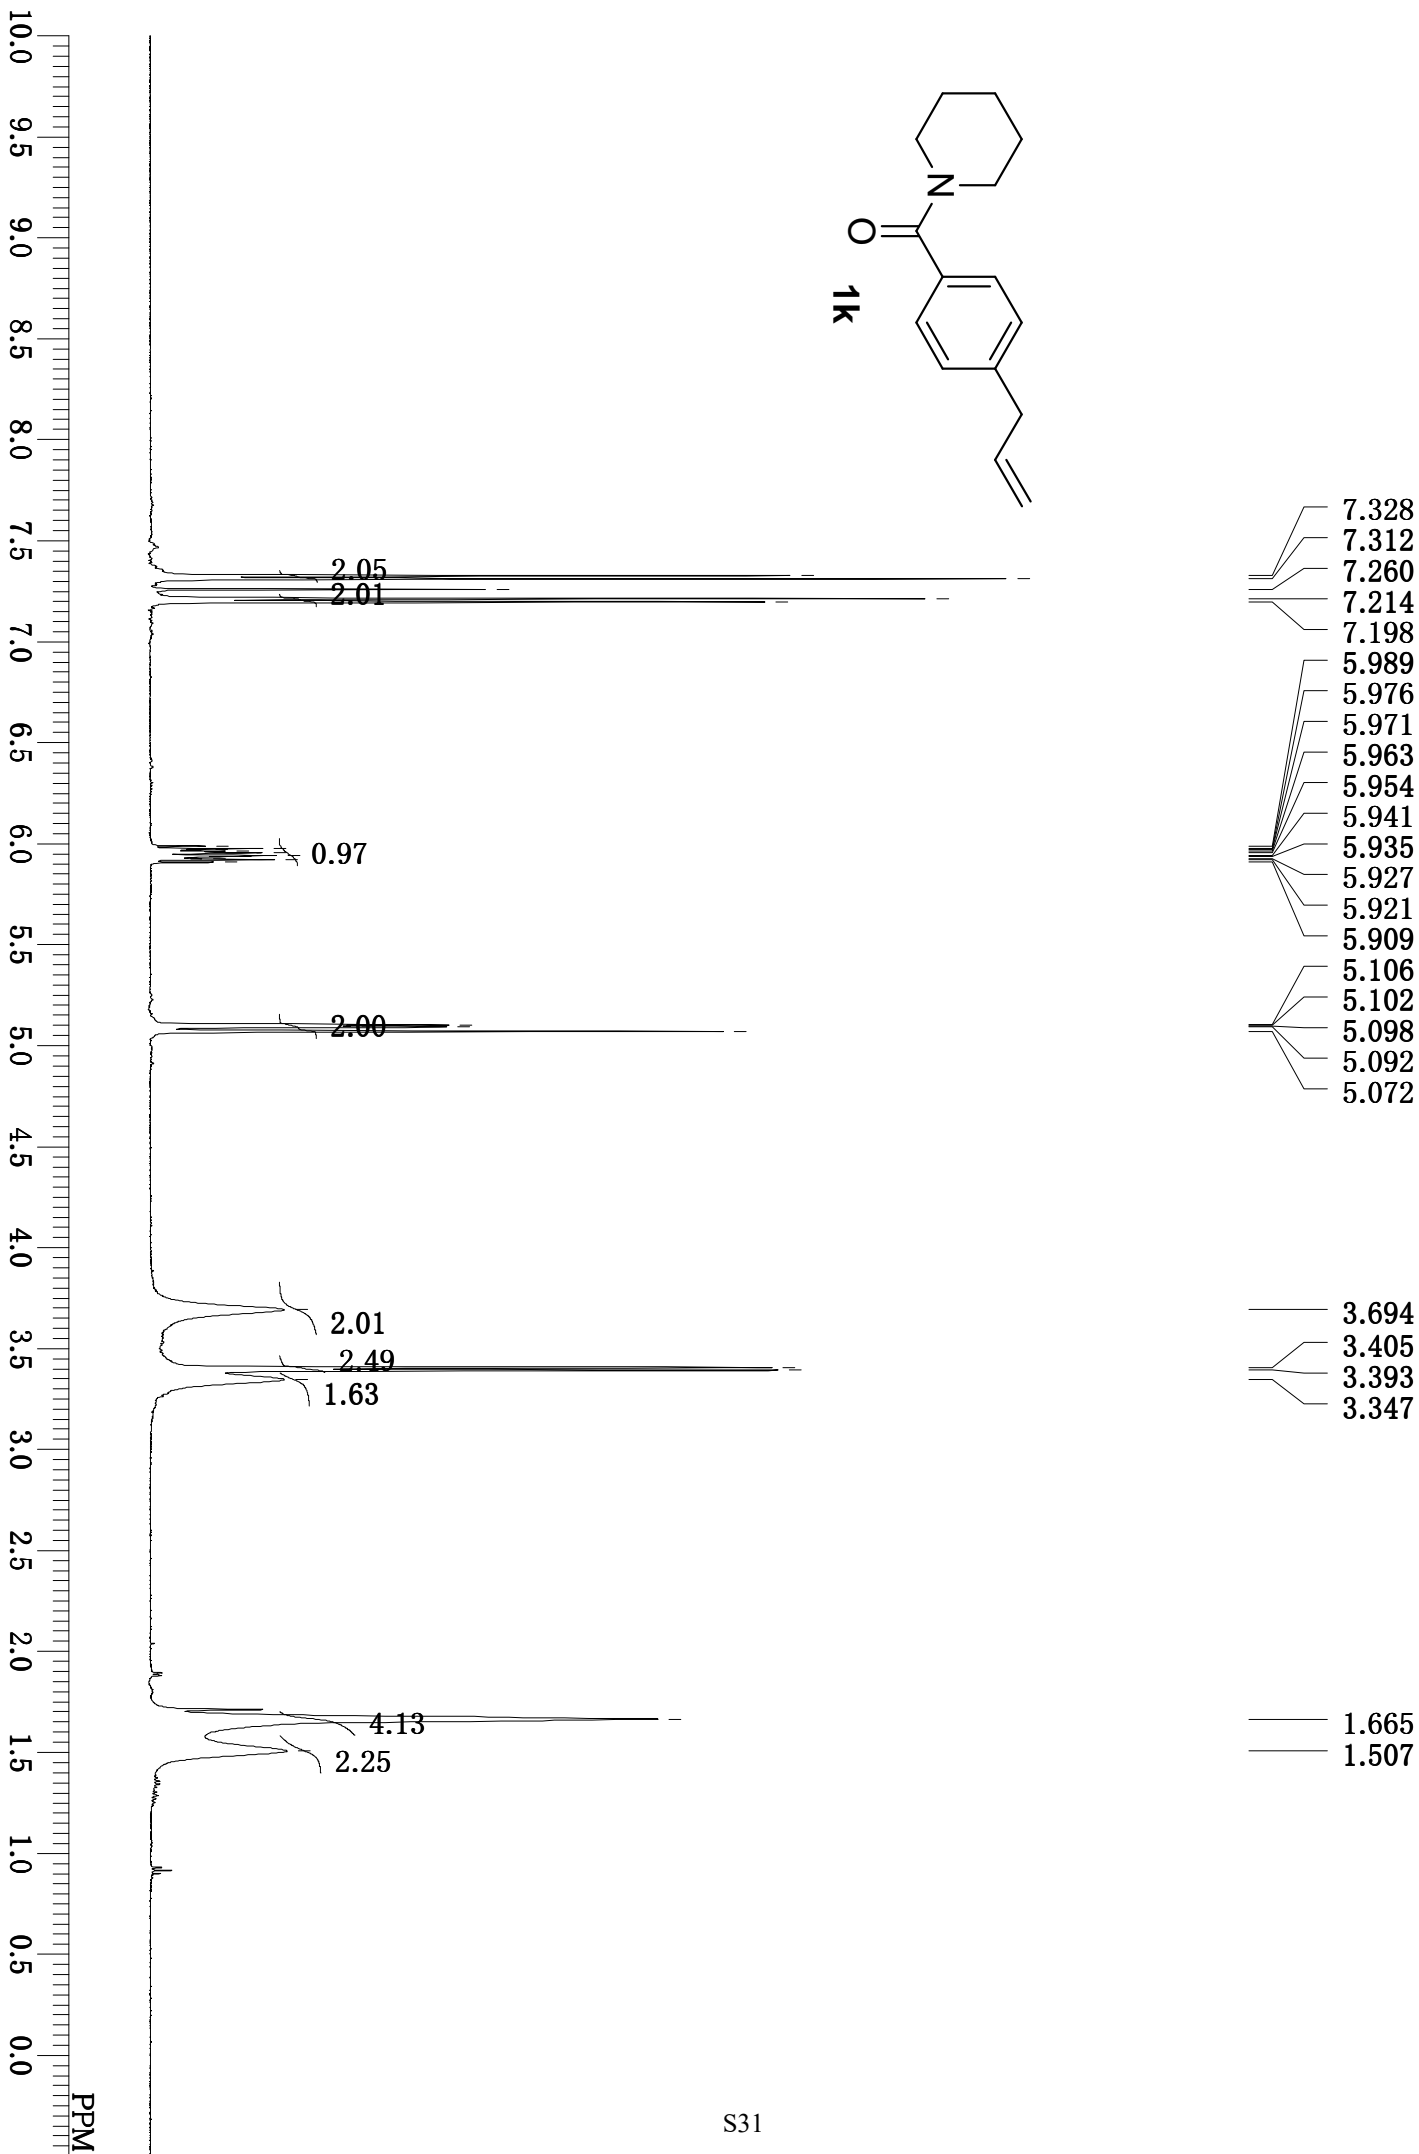

125 MHz, CDCl<sub>3</sub>

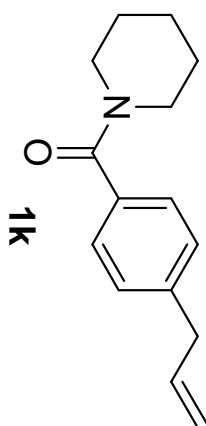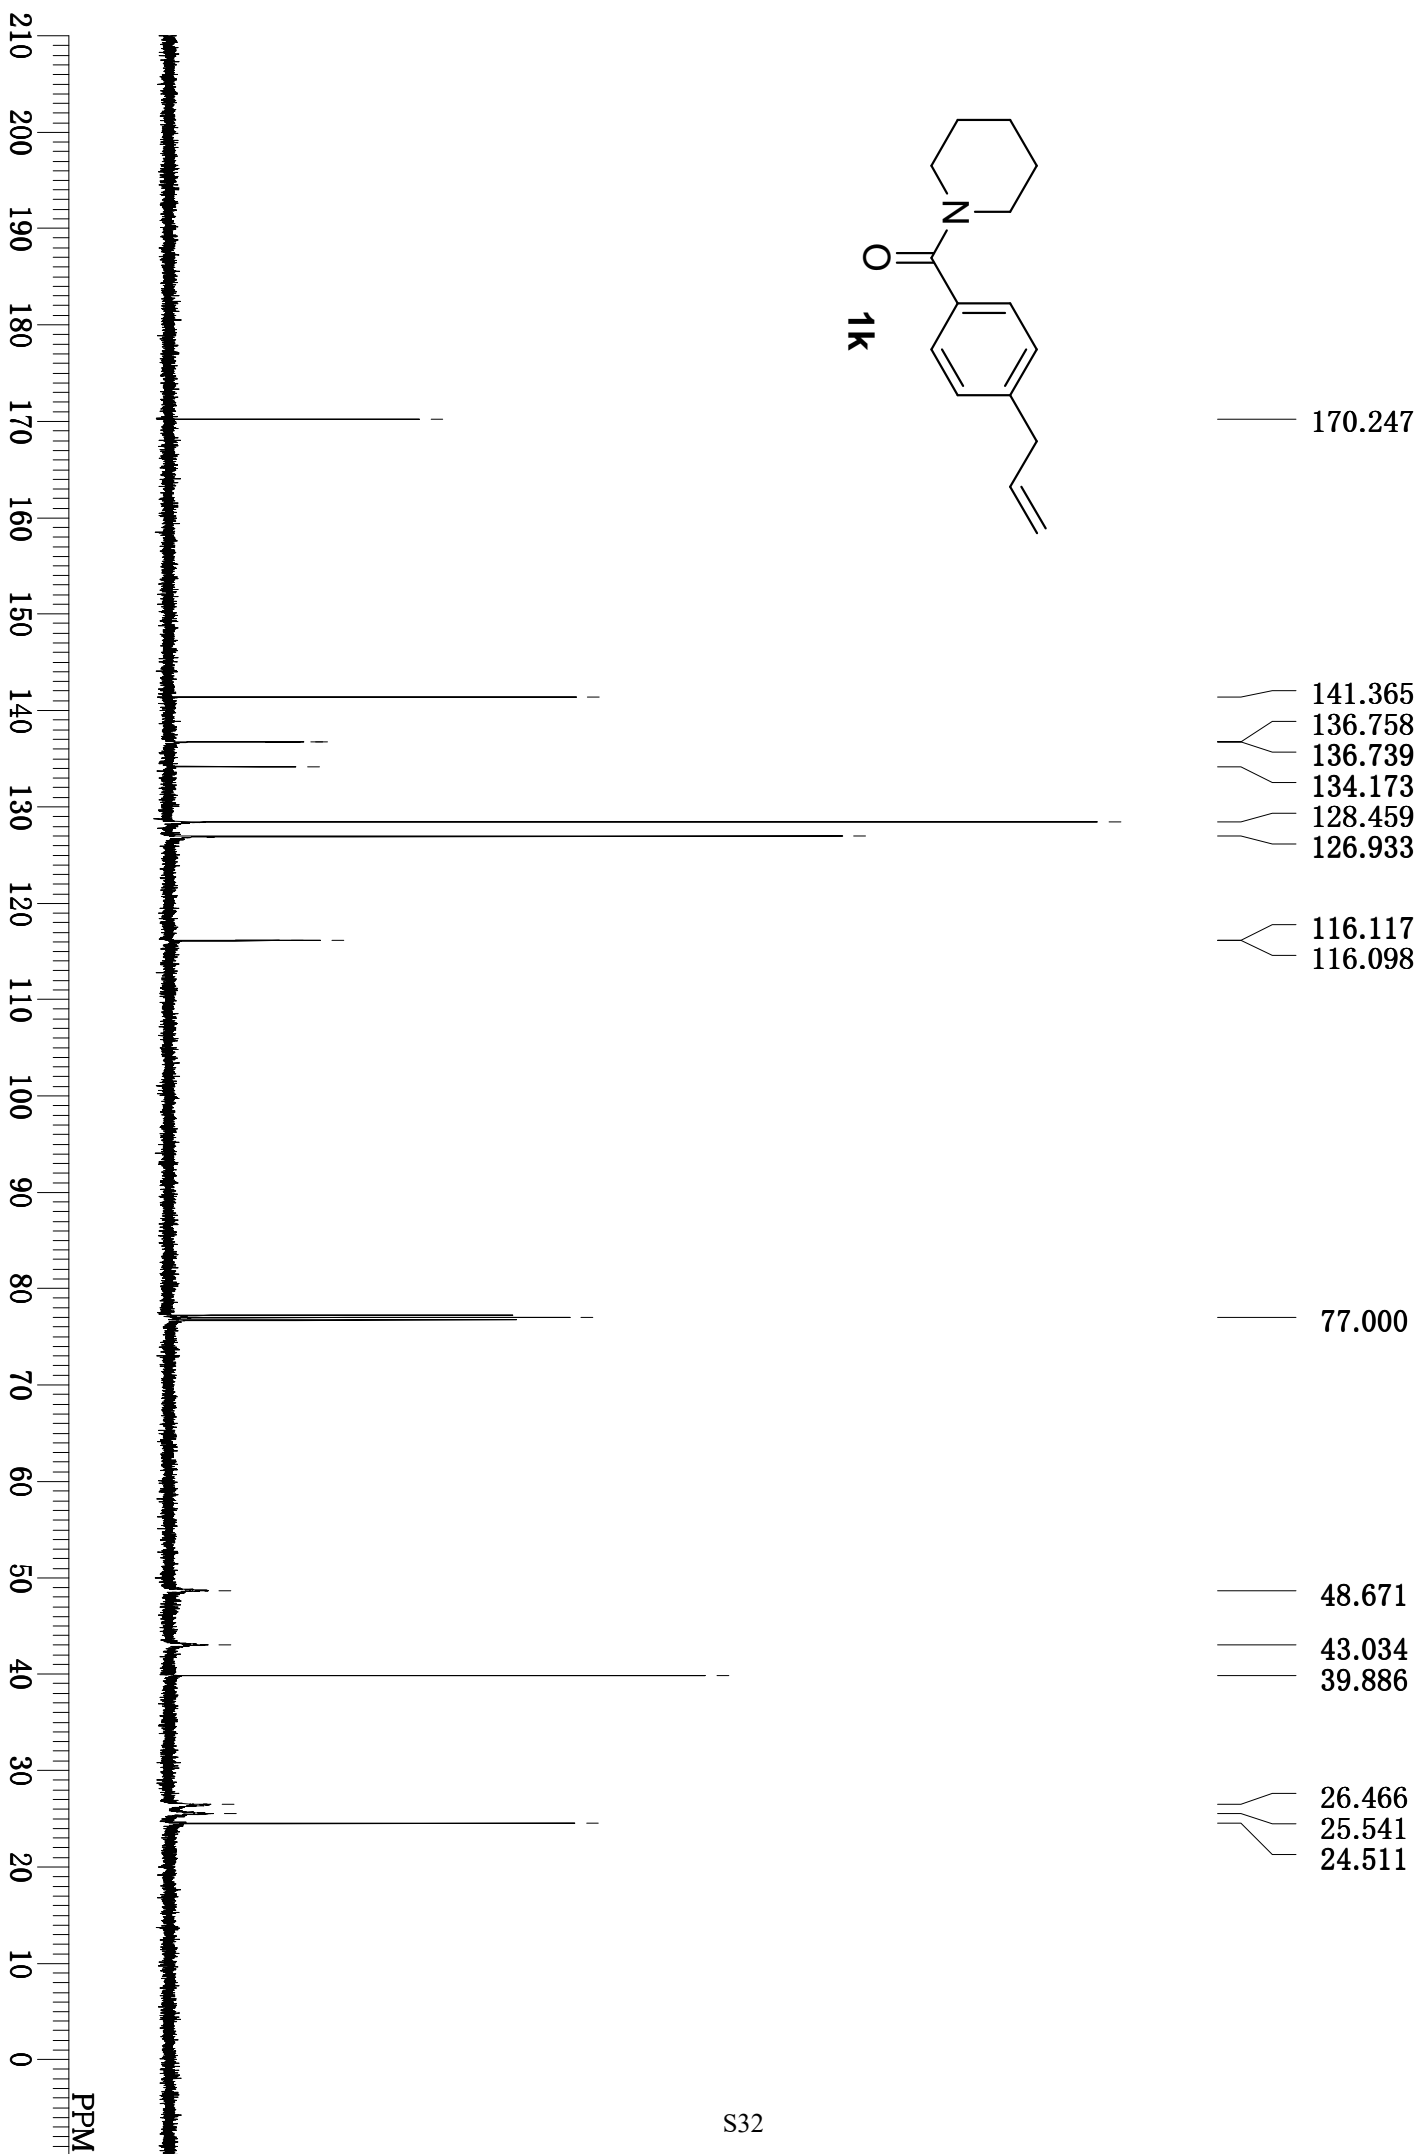



125 MHz, CDCl<sub>3</sub>

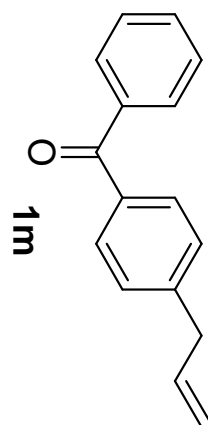

196.401

145.085  
137.807  
136.347  
135.489  
132.198  
130.386  
129.928  
128.478  
128.192

116.622

77.000

40.134



500 MHz, CDCl<sub>3</sub>

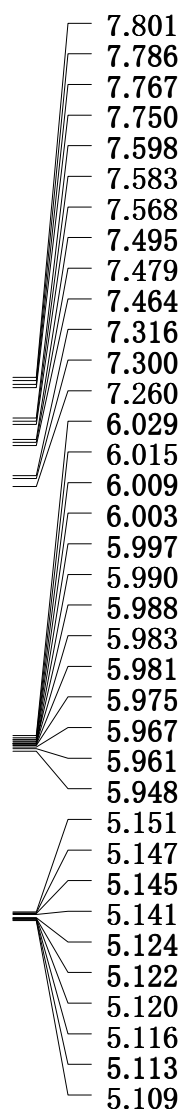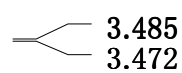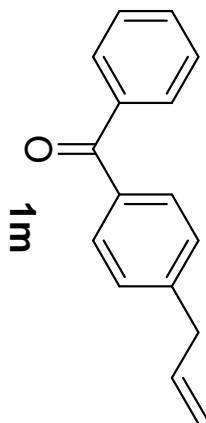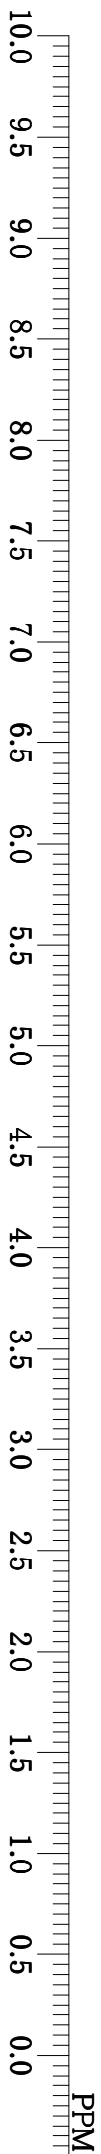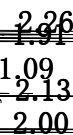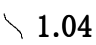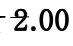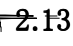

500 MHz, CDCl<sub>3</sub>

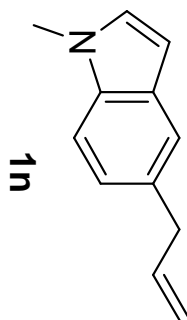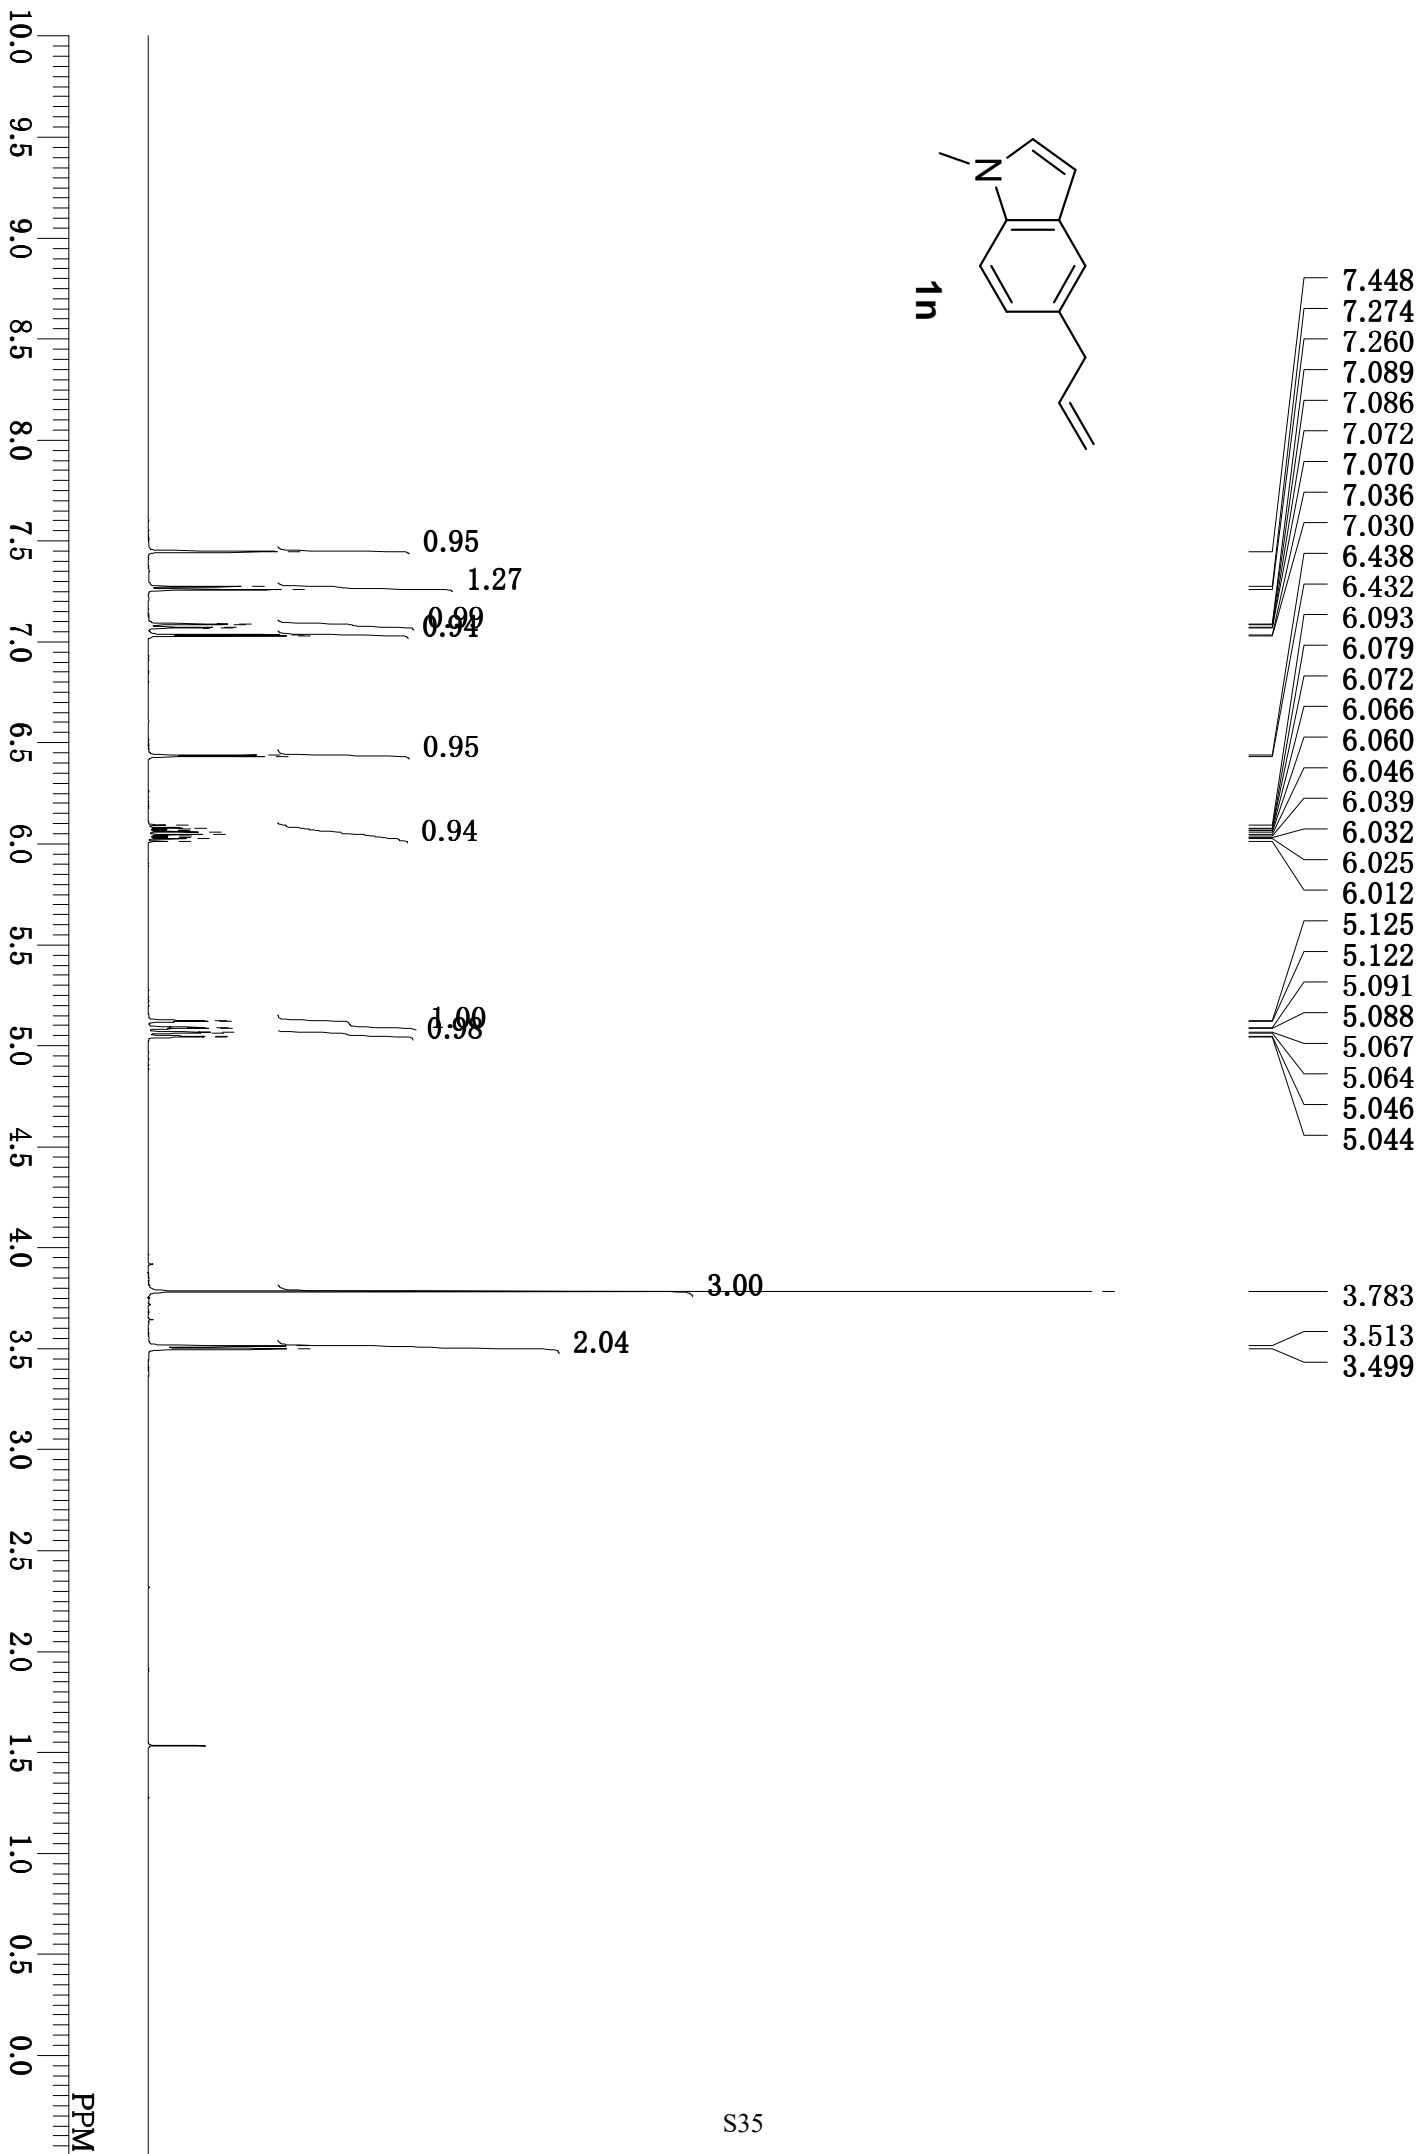

125 MHz, CDCl<sub>3</sub>

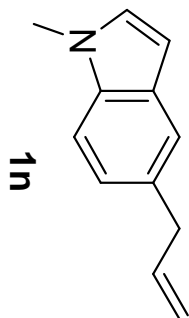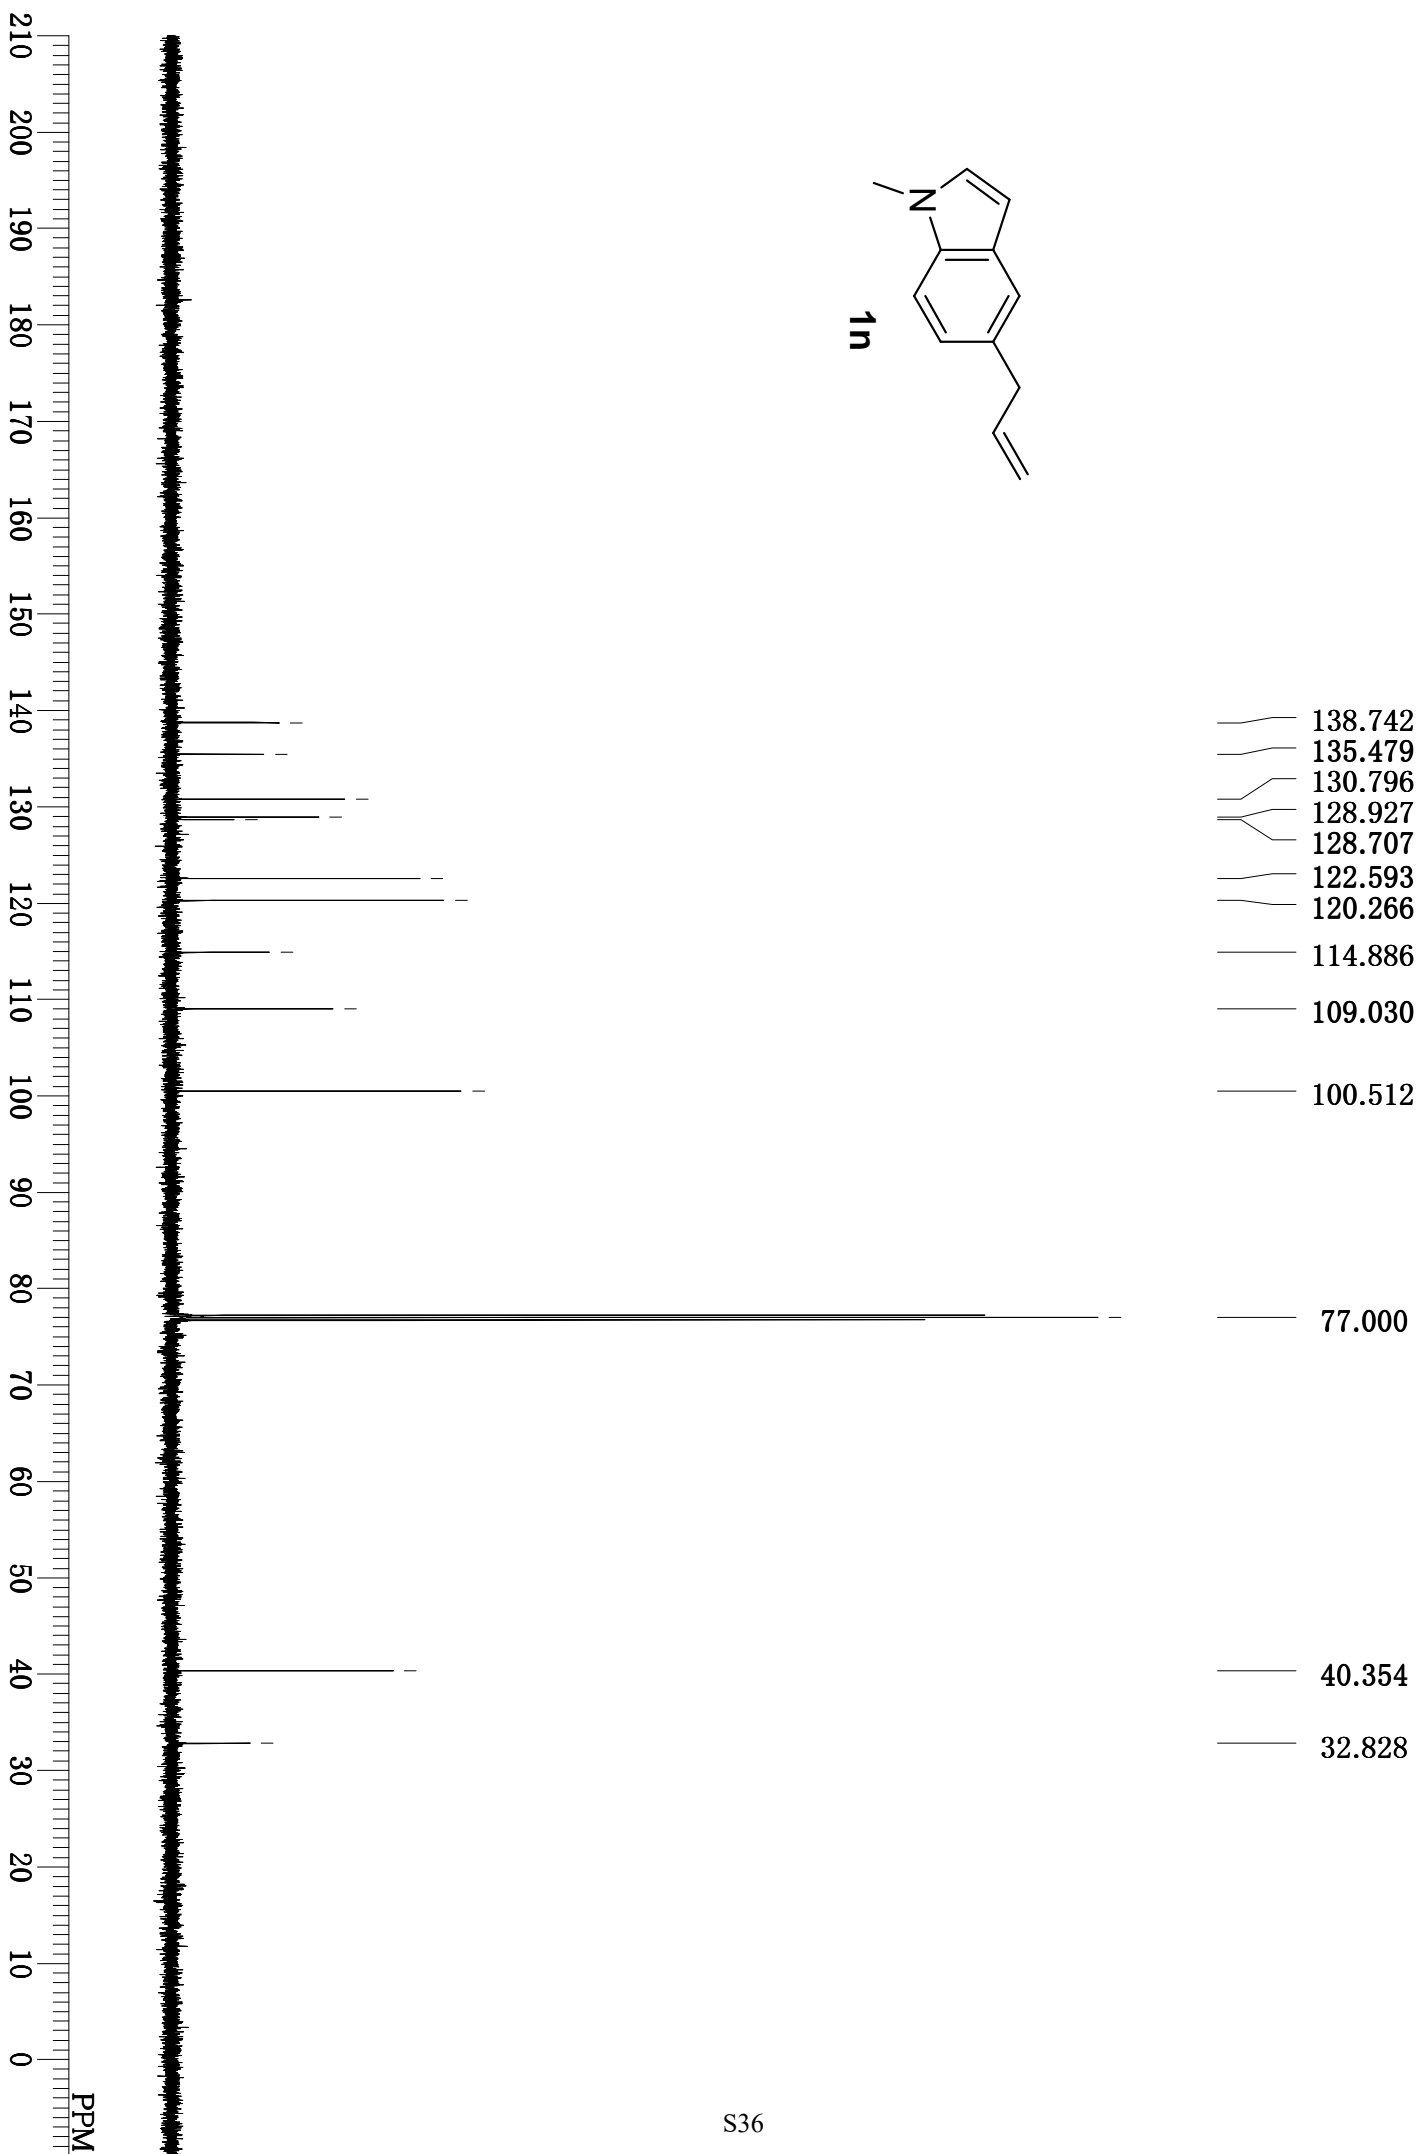

500 MHz, CDCl<sub>3</sub>

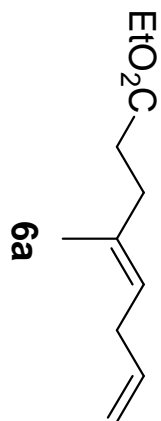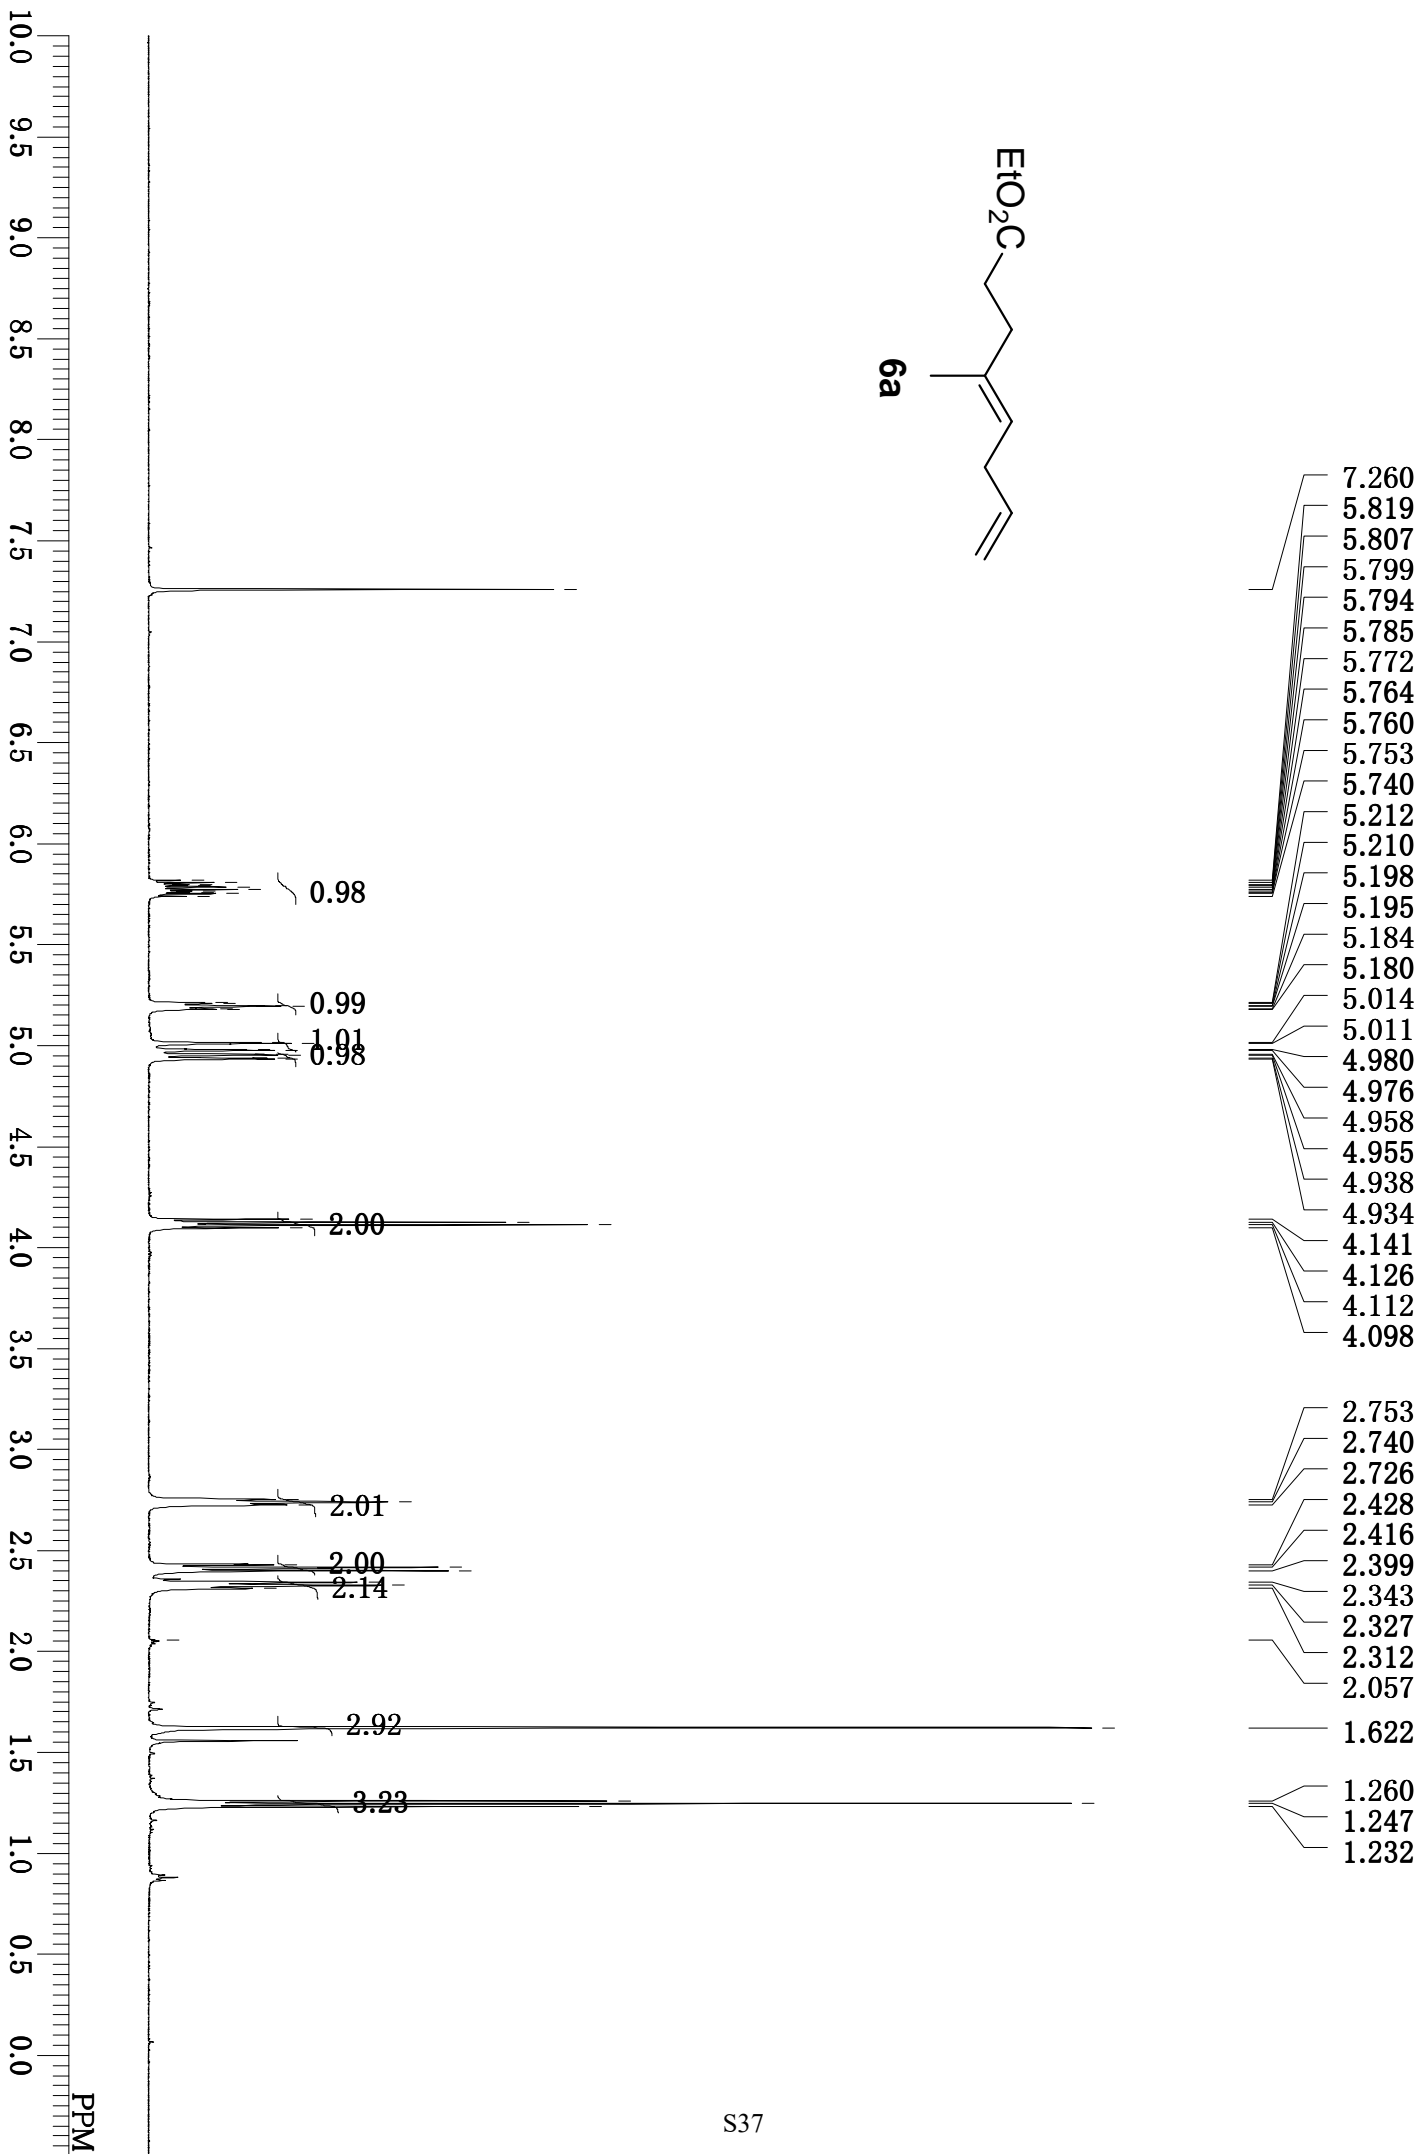

125 MHz, CDCl<sub>3</sub>

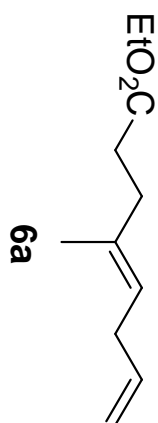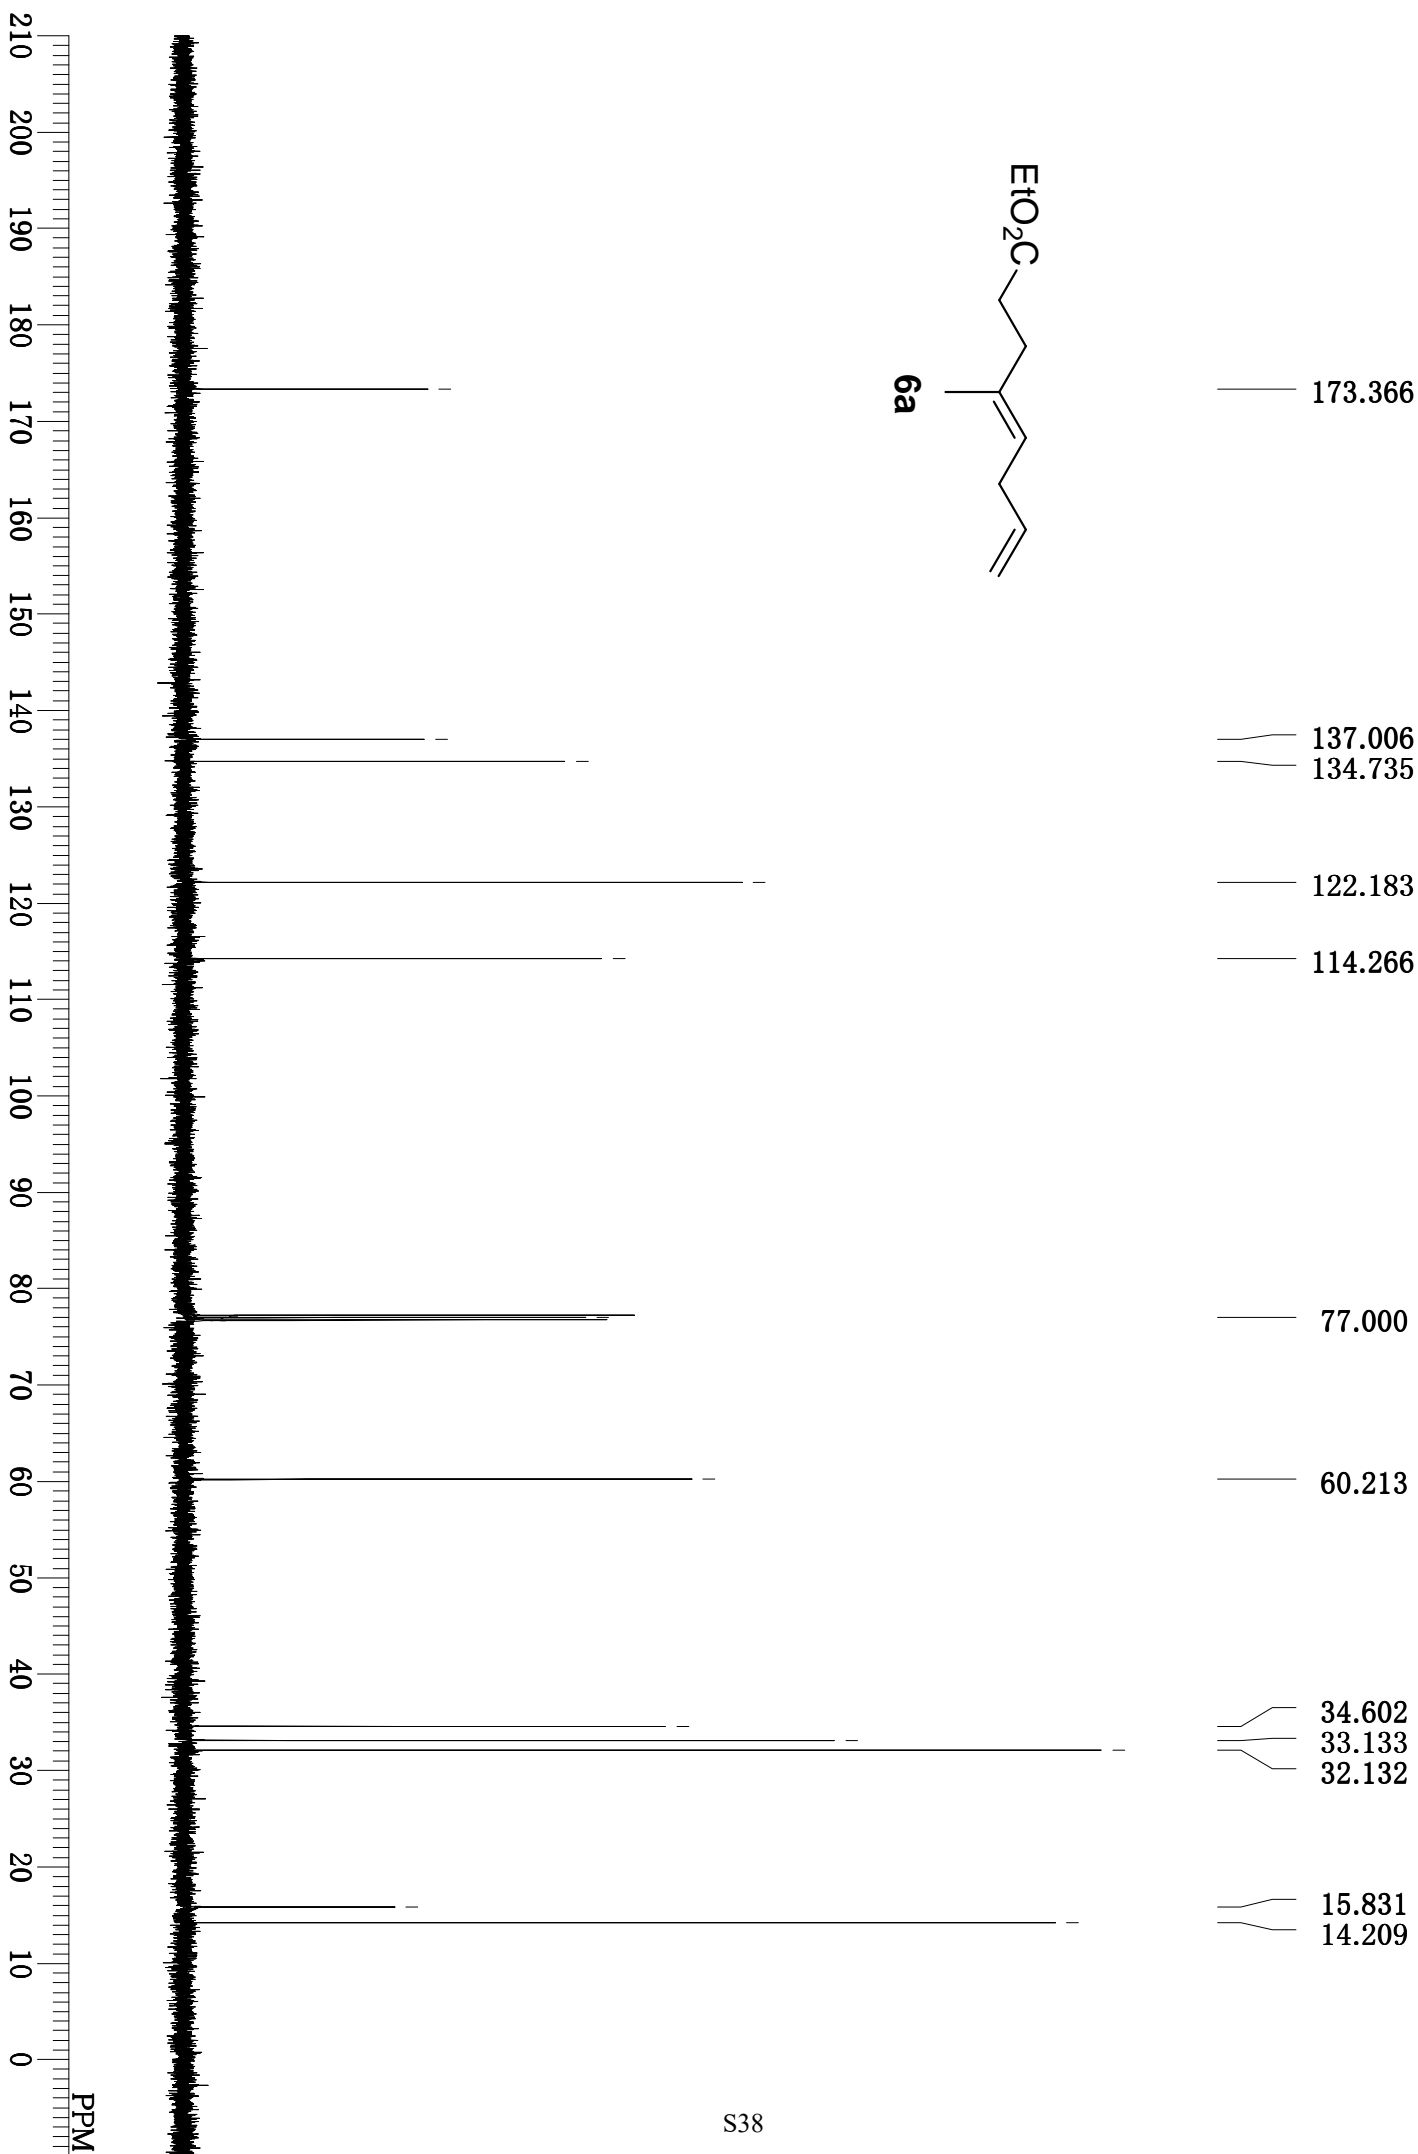

500 MHz, CDCl<sub>3</sub>

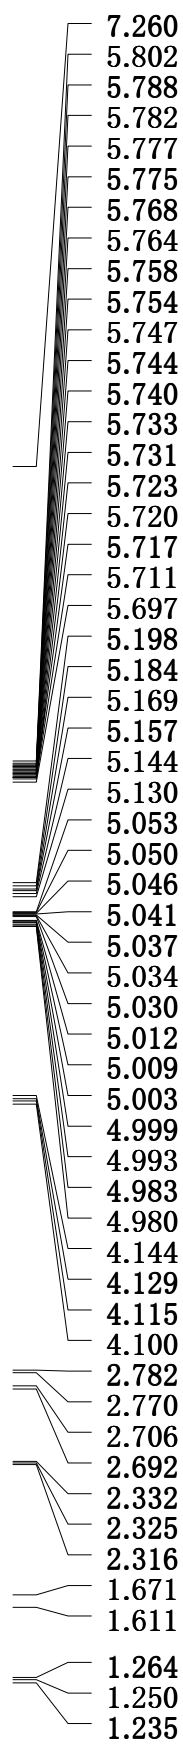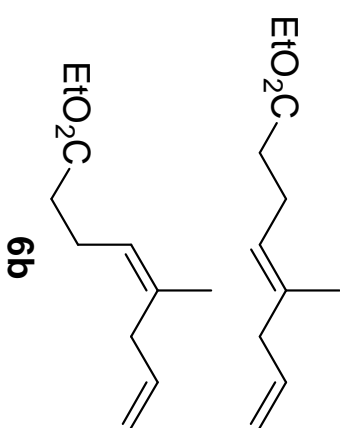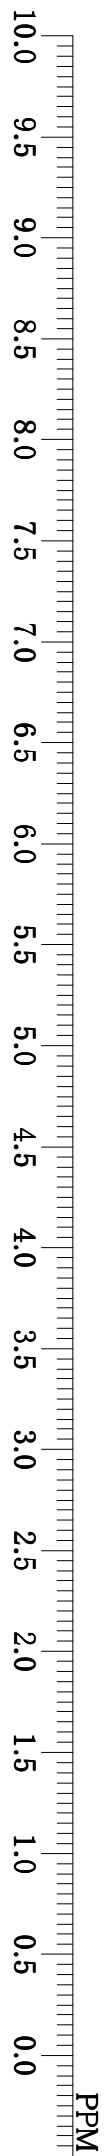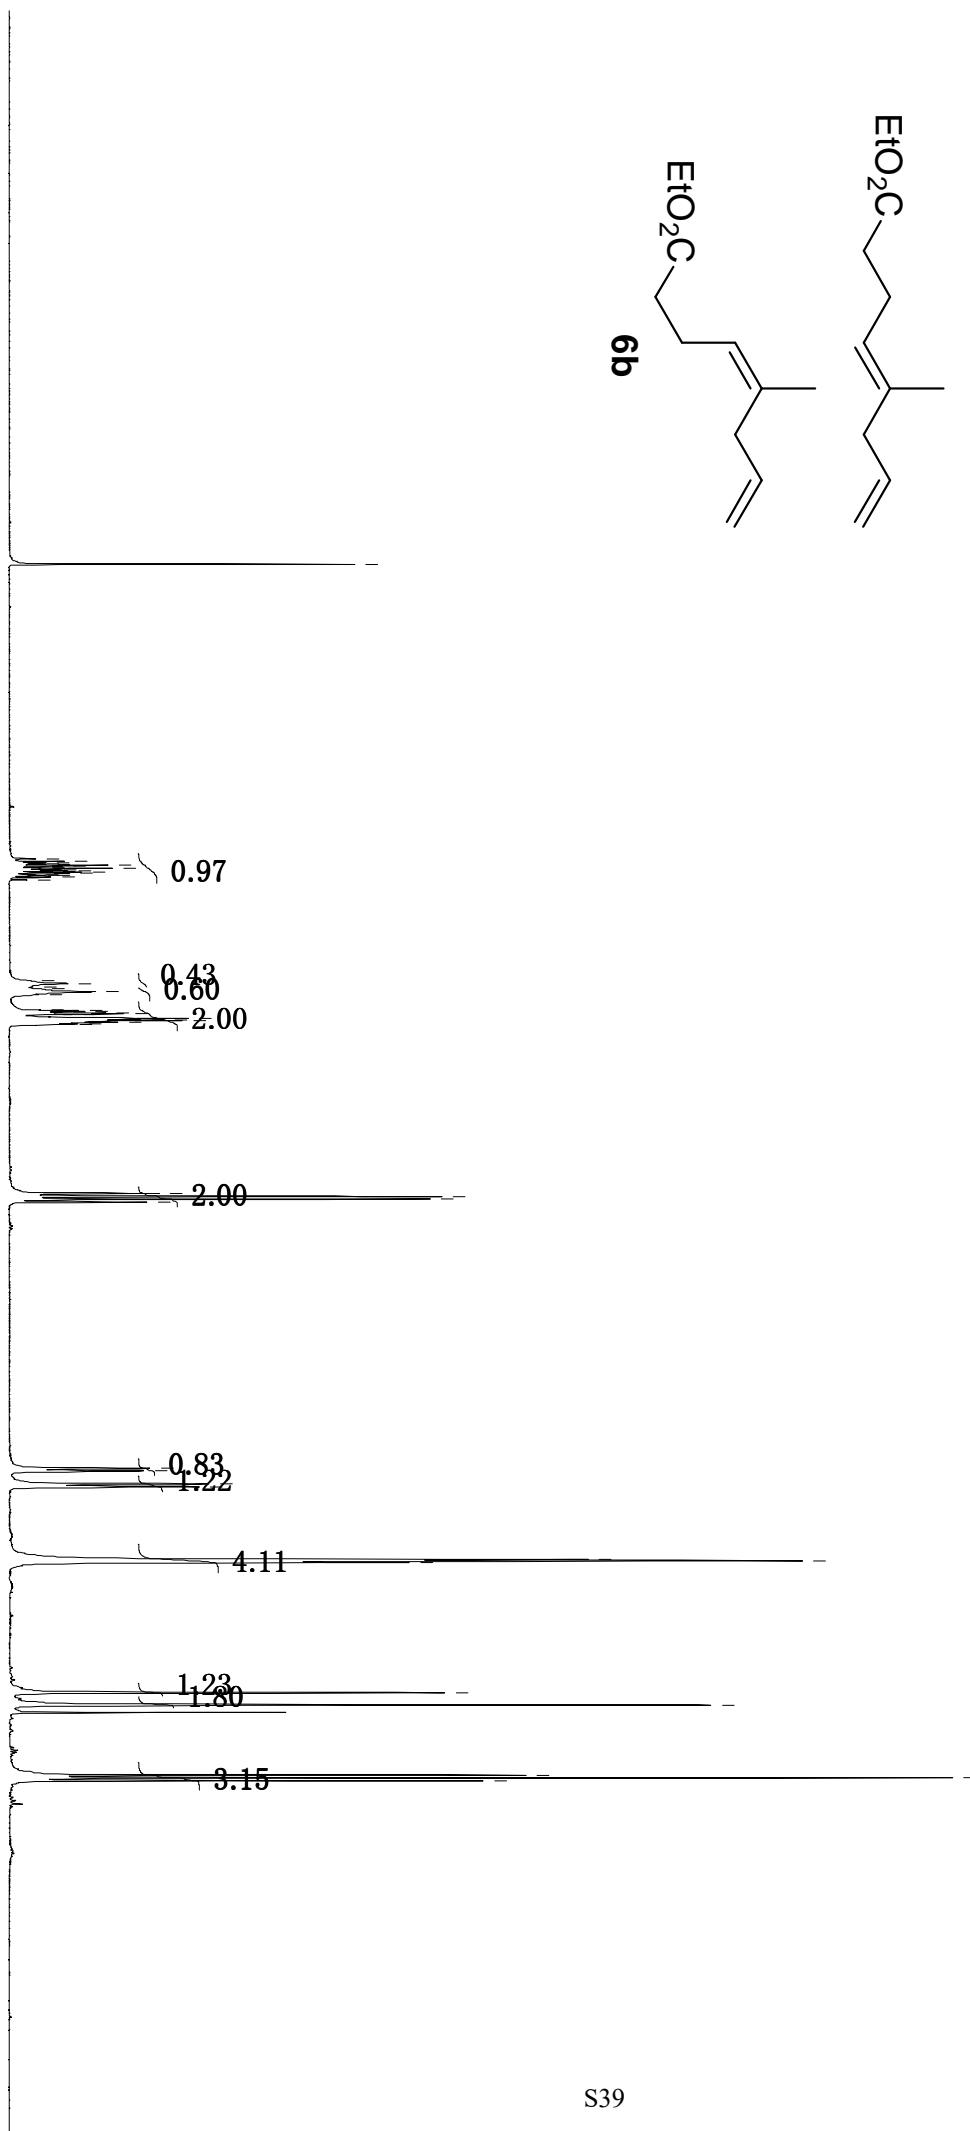

125 MHz, CDCl<sub>3</sub>

173.328  
173.280

136.739  
135.785  
135.041  
134.535

123.852  
123.328

115.687  
115.211

77.000

60.193

43.978

36.290  
34.545  
34.402

23.585  
23.376  
23.318

15.955  
14.209

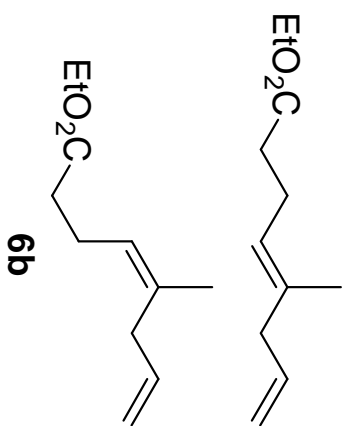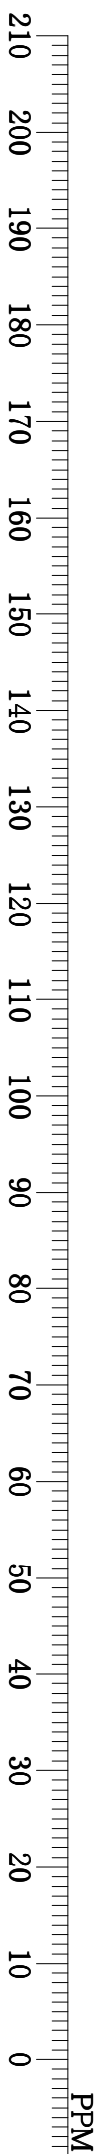



500 MHz, CDCl<sub>3</sub>

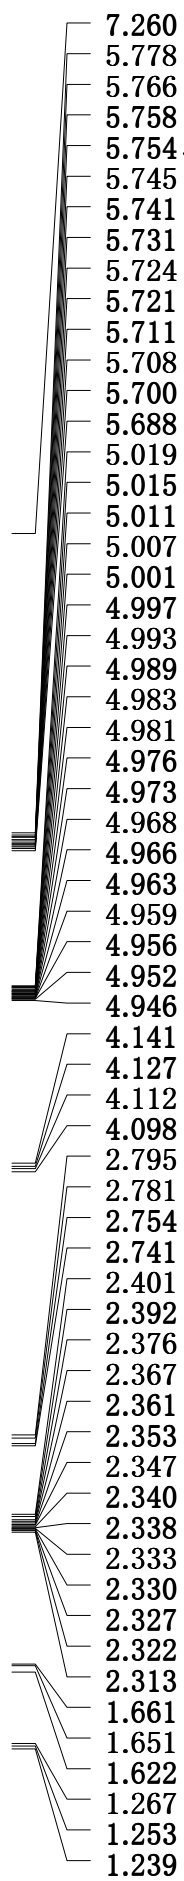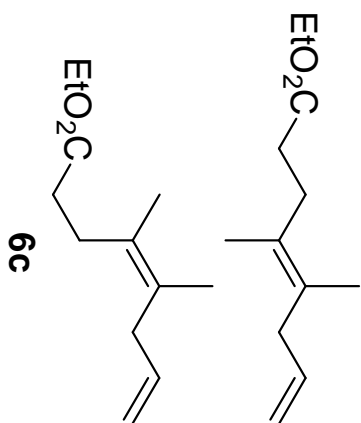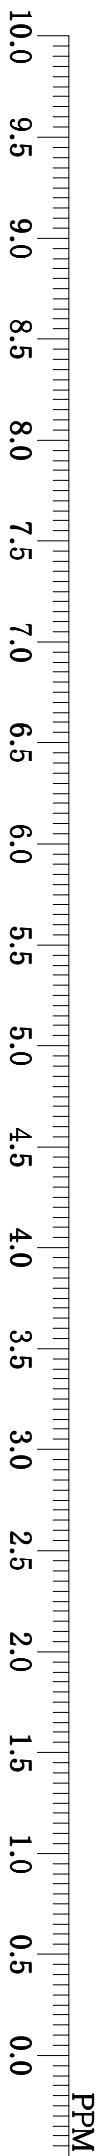

125 MHz, CDCl<sub>3</sub>

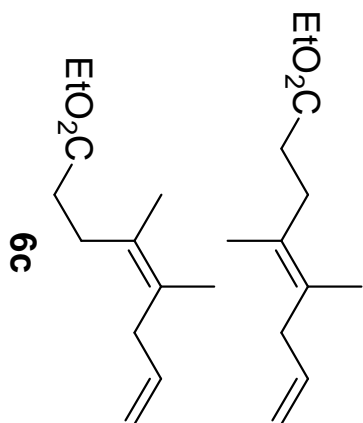

173.480

136.519  
135.832

127.620  
127.534  
127.324

114.781  
114.505

77.000

60.203

38.933  
38.494  
33.343  
33.009  
29.976  
29.547

18.416  
18.044  
18.005  
17.614  
14.171

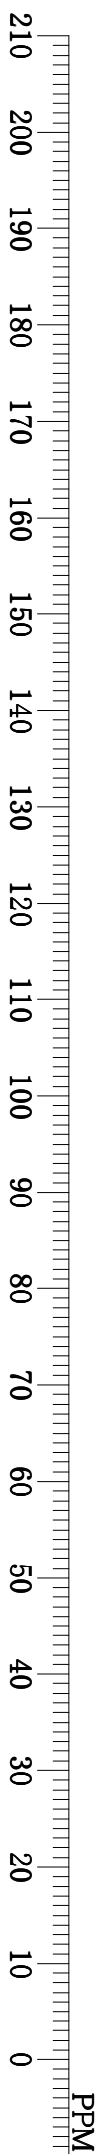

500 MHz, CDCl<sub>3</sub>

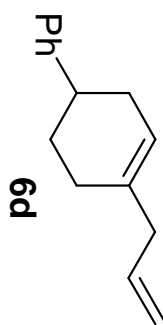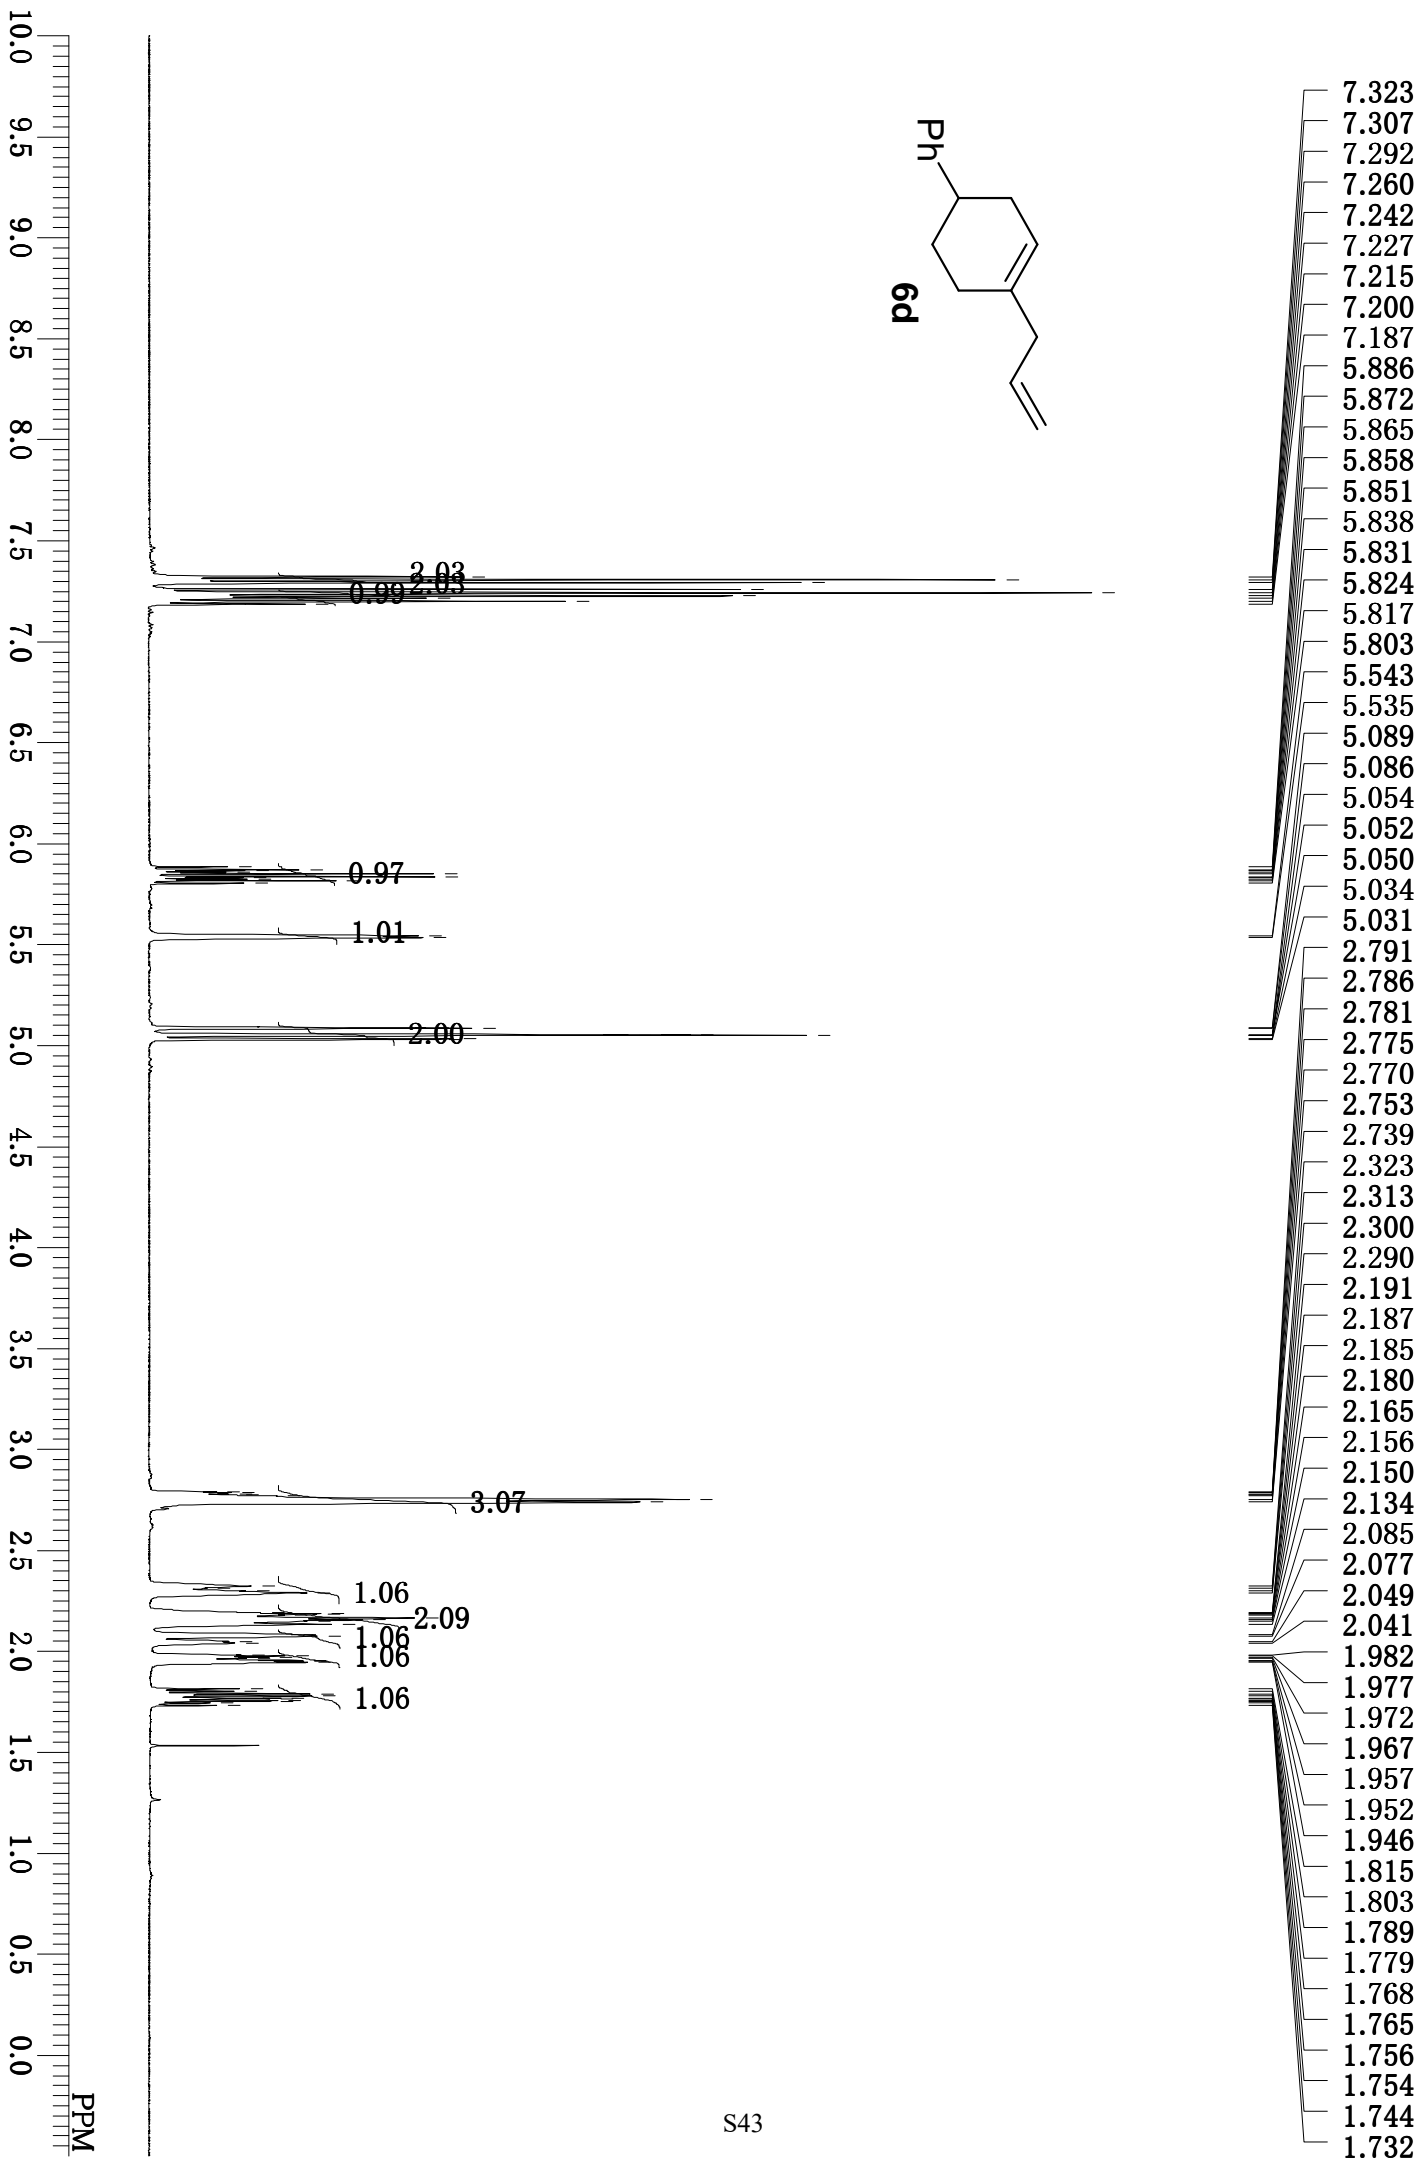

125 MHz, CDCl<sub>3</sub>

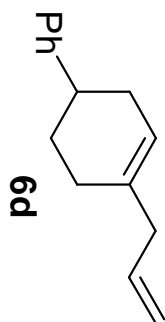

|   |         |
|---|---------|
| — | 147.183 |
| — | 136.729 |
| — | 136.223 |
| — | 128.316 |
| — | 126.866 |
| — | 125.932 |
| — | 121.544 |
| — | 115.687 |
| — | 77.000  |
| — | 42.080  |
| — | 40.163  |
| — | 33.610  |
| — | 30.043  |
| — | 29.013  |



500 MHz, CDCl<sub>3</sub>

7.321  
7.312  
7.306  
7.298  
7.290  
7.282  
7.260  
7.234  
7.230  
7.226  
7.223  
7.219  
7.212  
7.200  
7.184  
5.928  
5.916  
5.910  
5.903  
5.897  
5.891  
5.885  
5.880  
5.873  
5.866  
5.861  
5.848  
5.110  
5.088  
5.083  
5.080  
5.076

2.895  
2.882

1.807

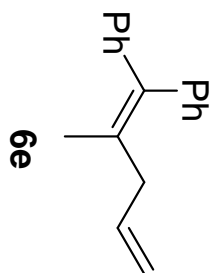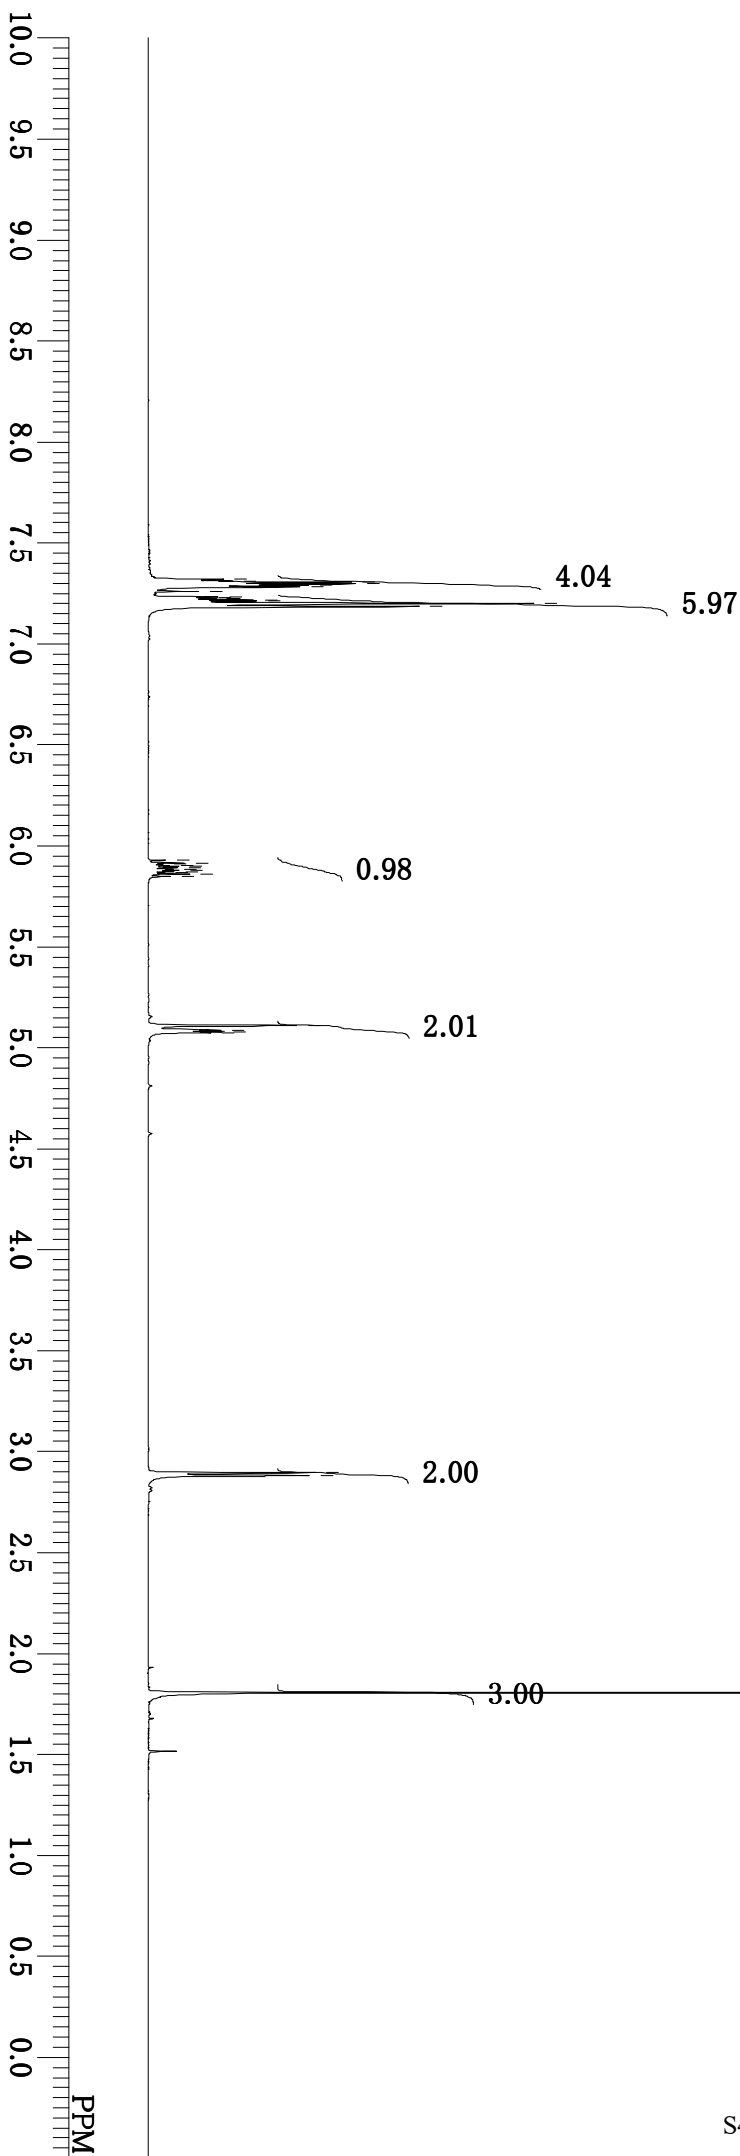

125 MHz, CDCl<sub>3</sub>

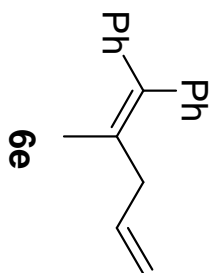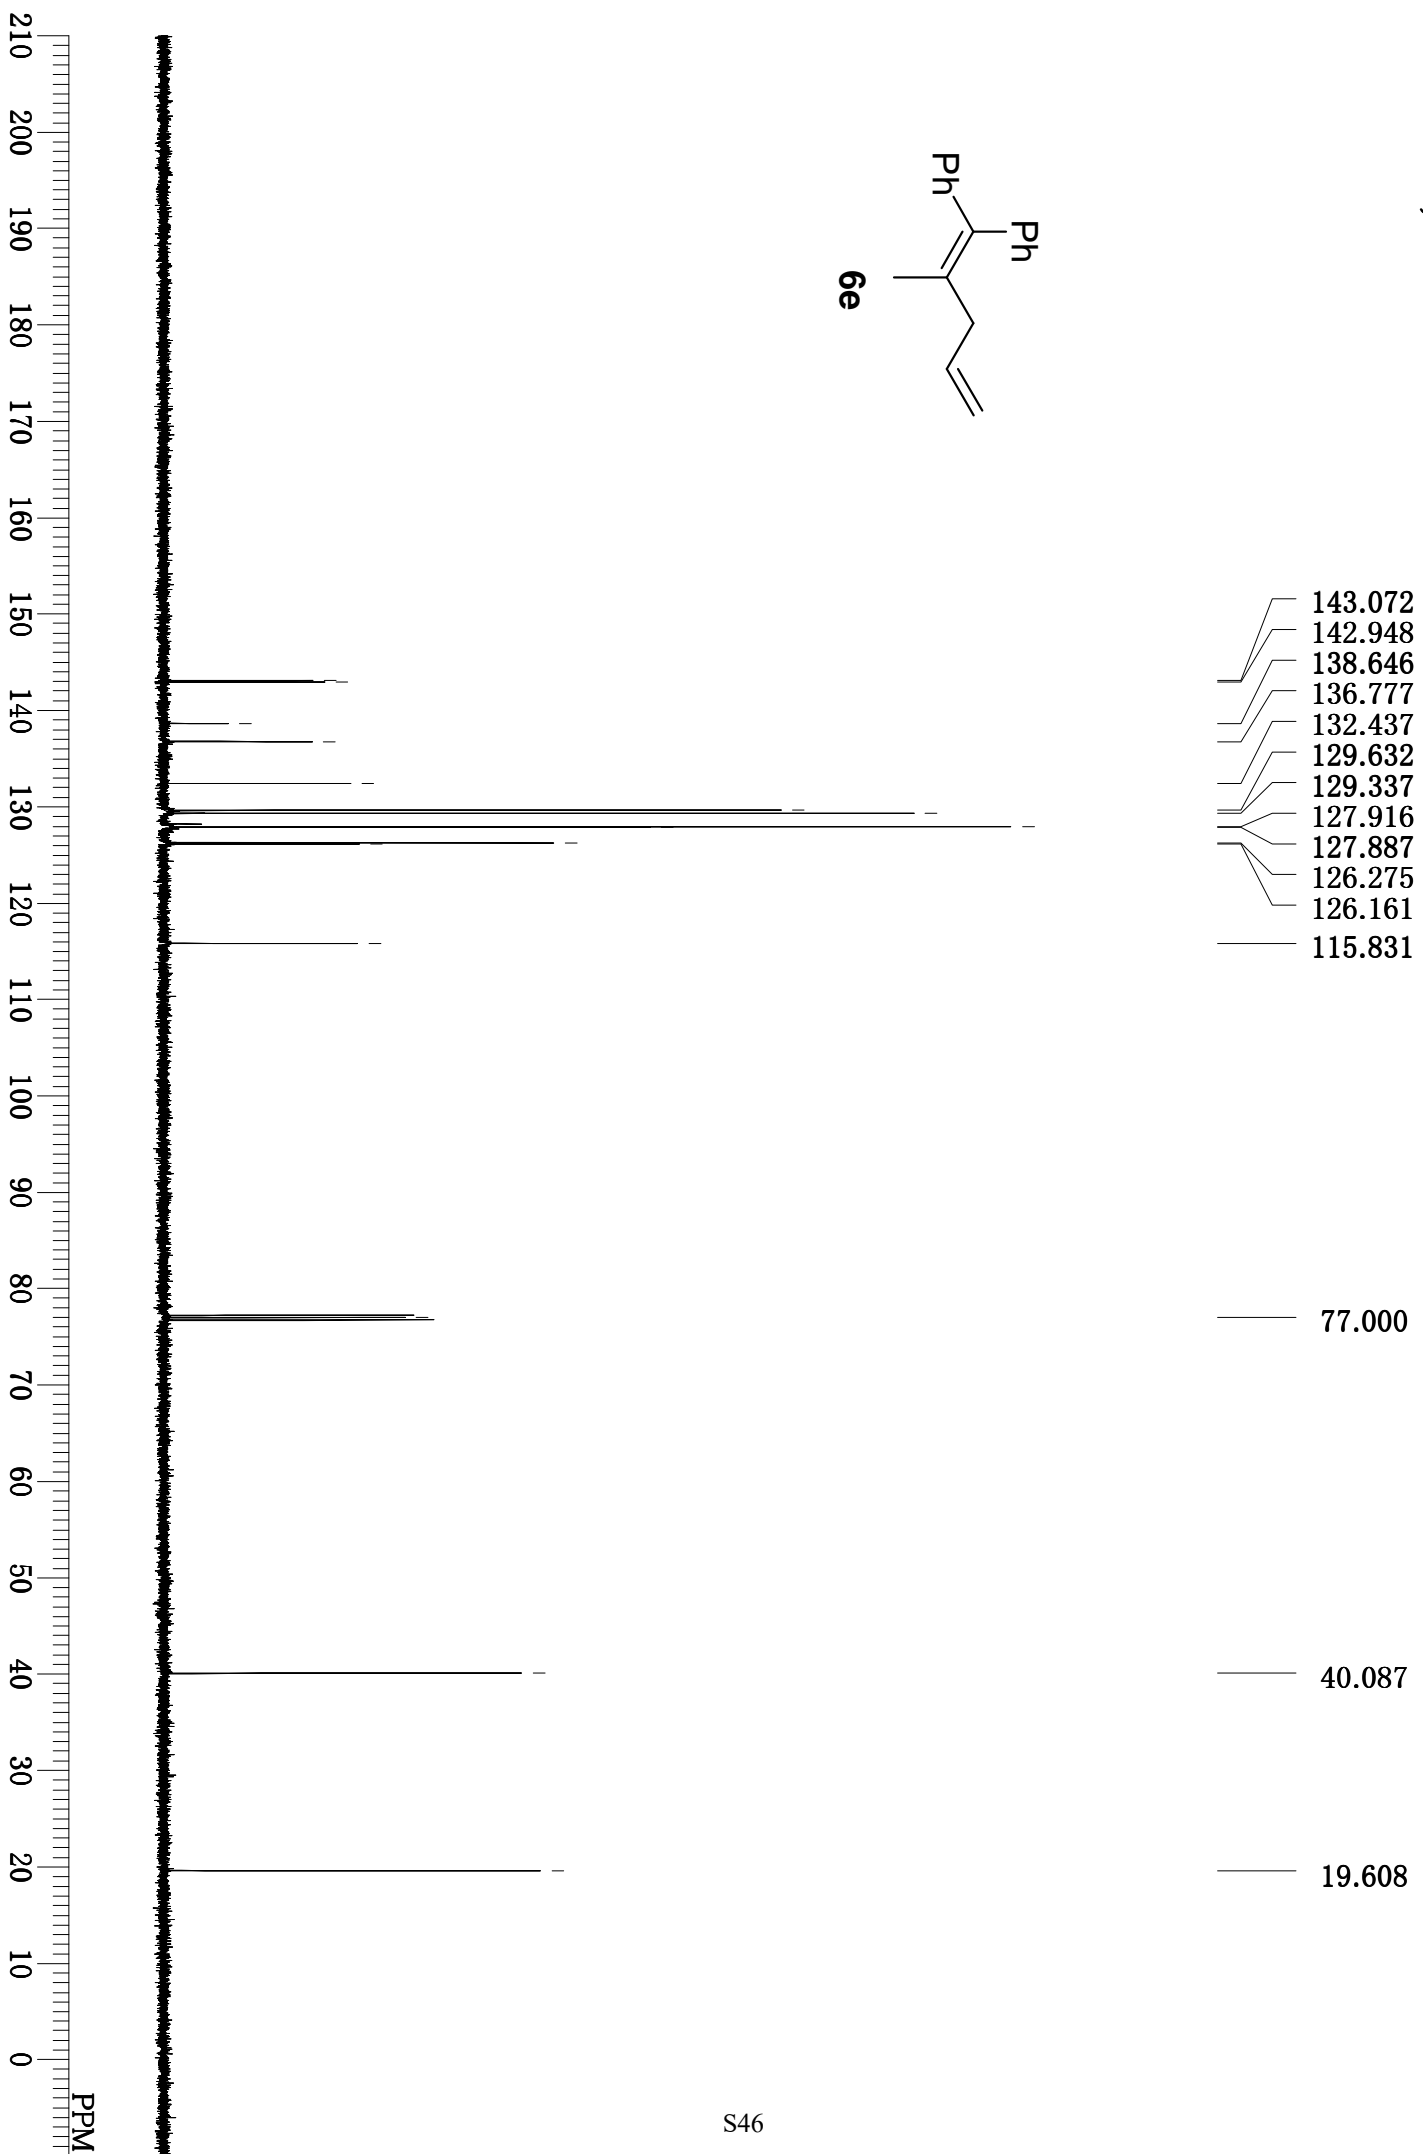

500 MHz, CDCl<sub>3</sub>

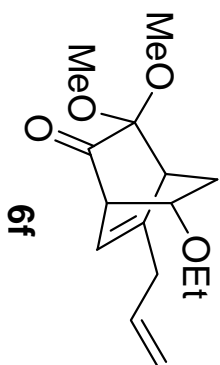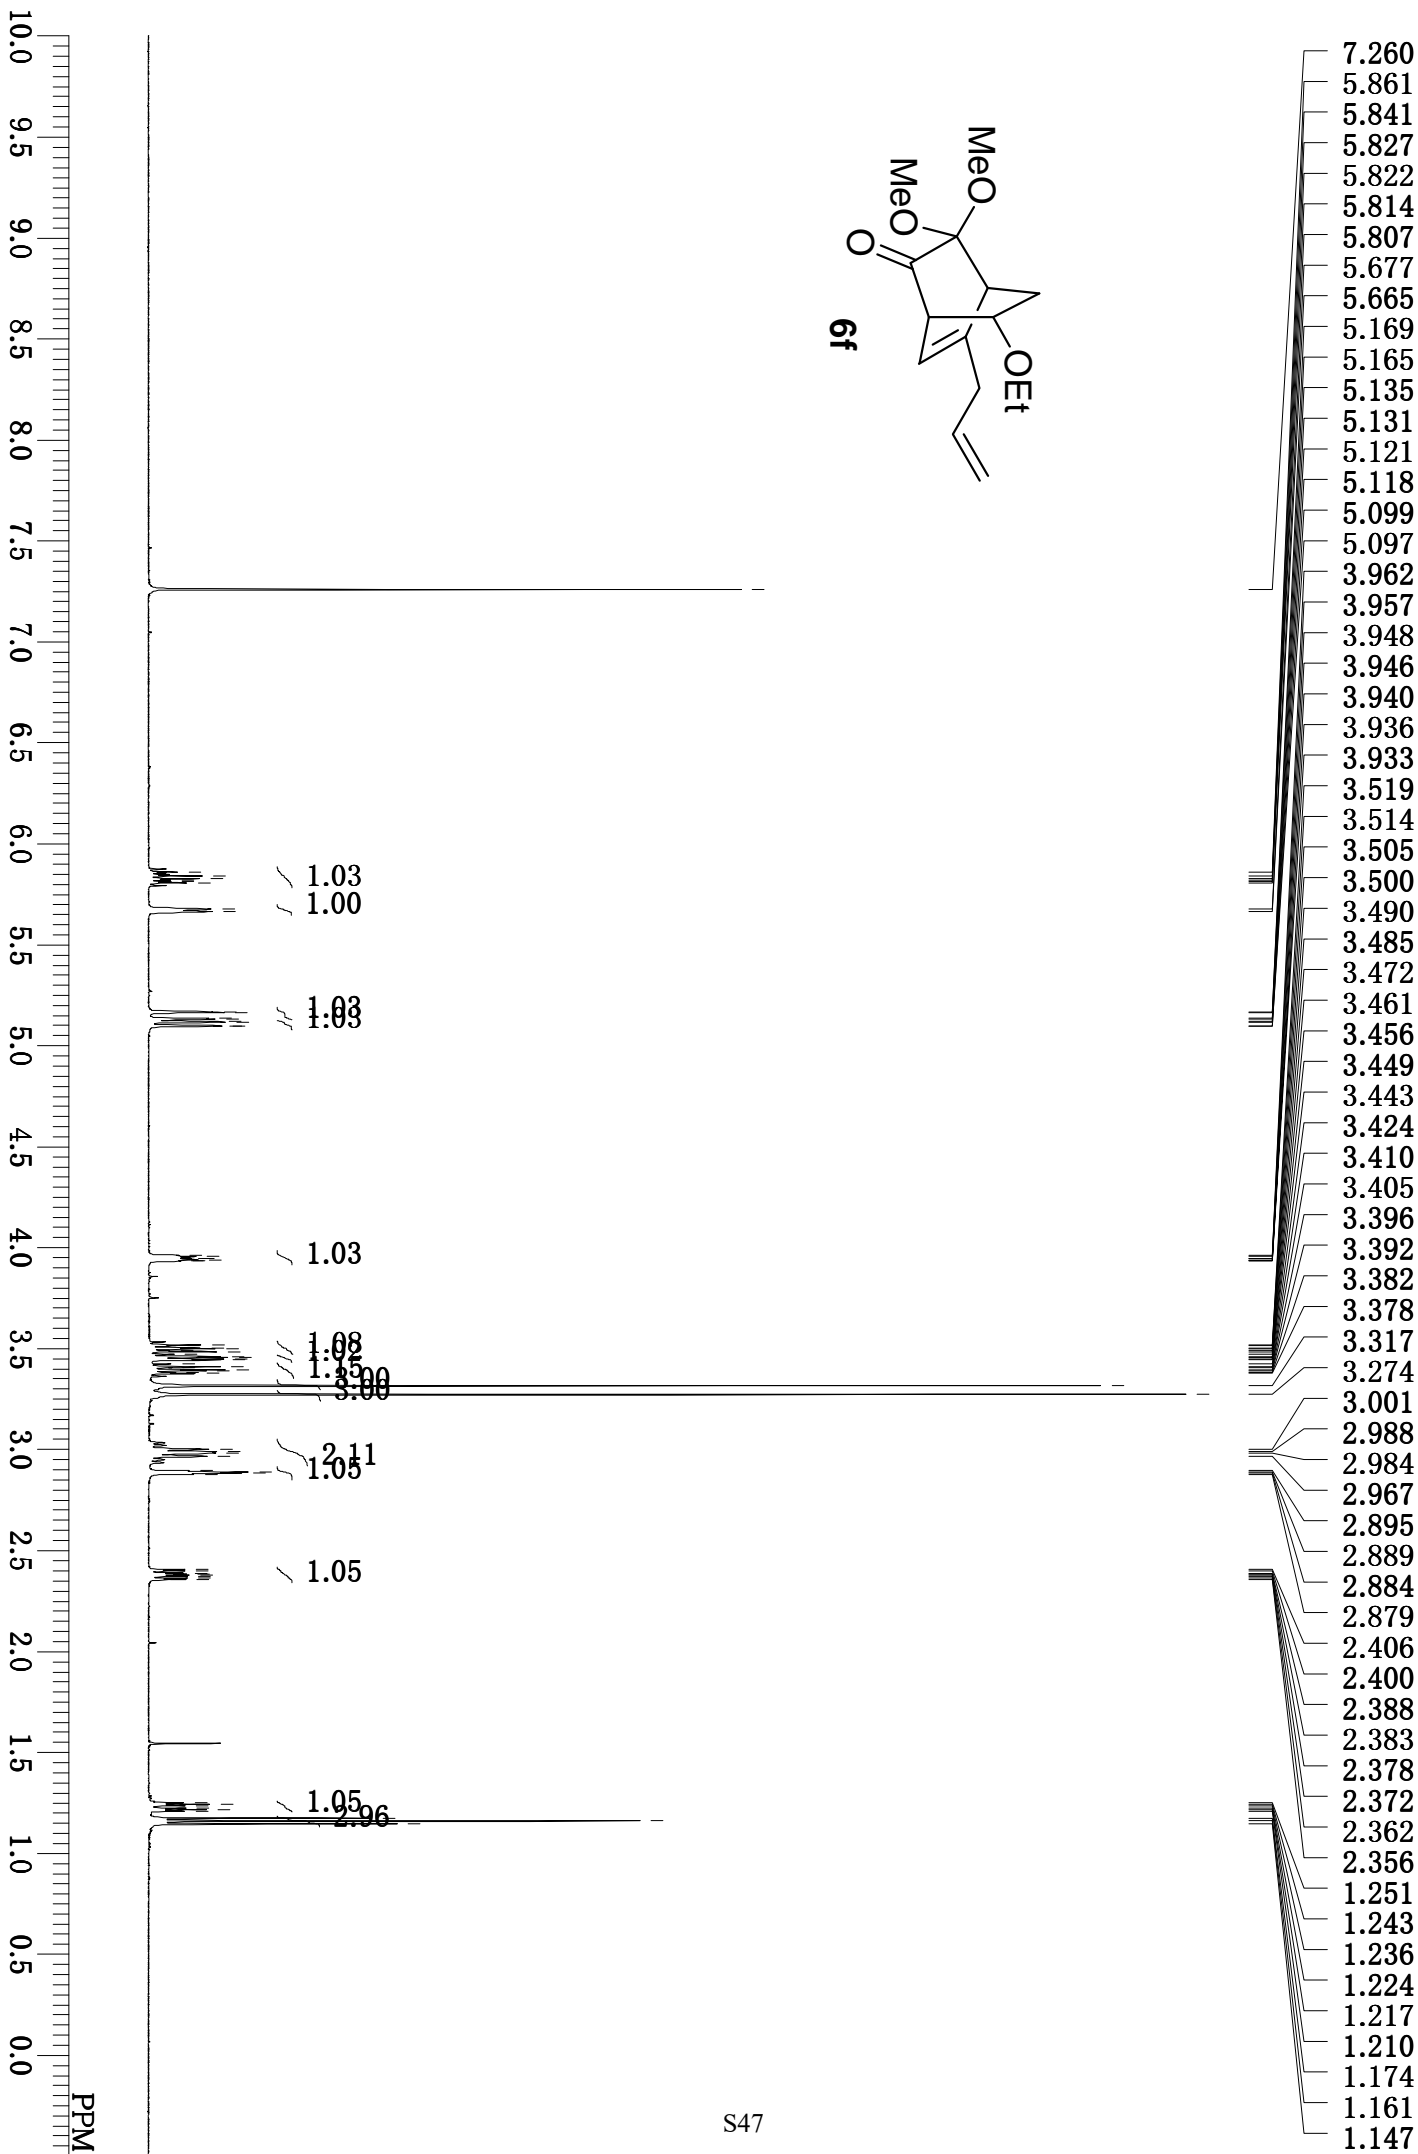

125 MHz, CDCl<sub>3</sub>

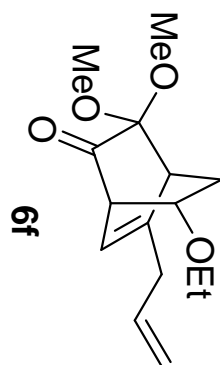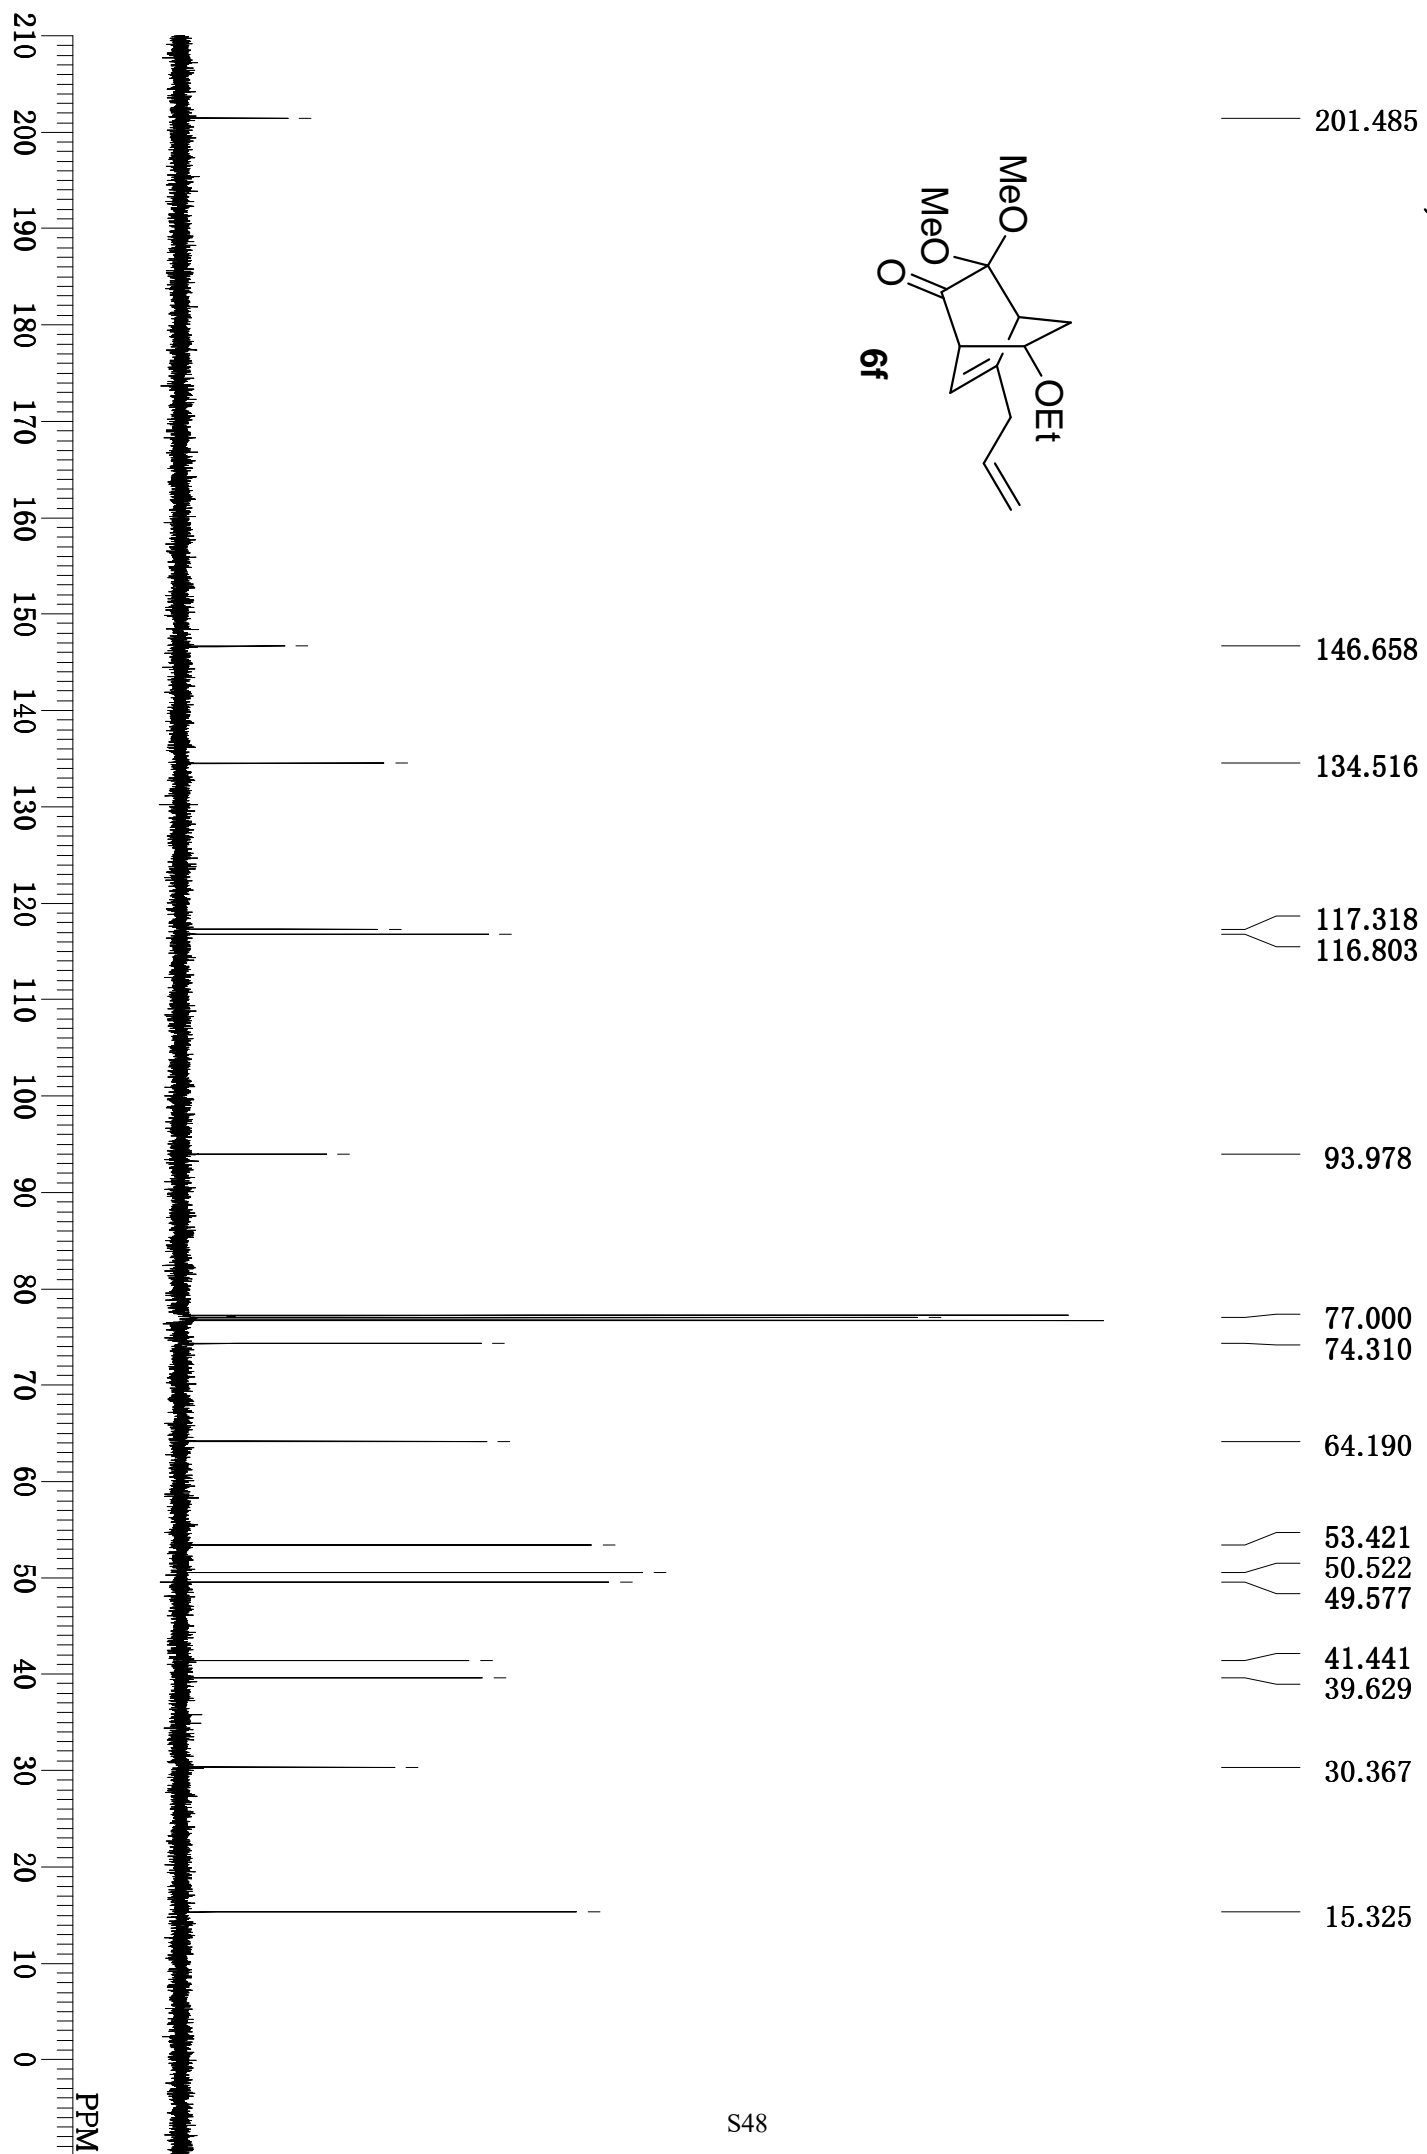



500 MHz, CDCl<sub>3</sub>

7.604  
7.588  
7.563  
7.547  
7.456  
7.438  
7.421  
7.355  
7.340  
7.325  
7.260  
6.550  
6.518  
6.377  
6.362  
6.346  
6.331  
6.316

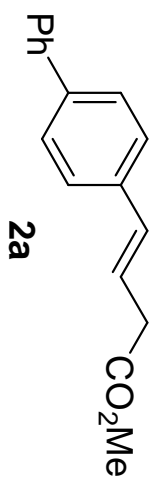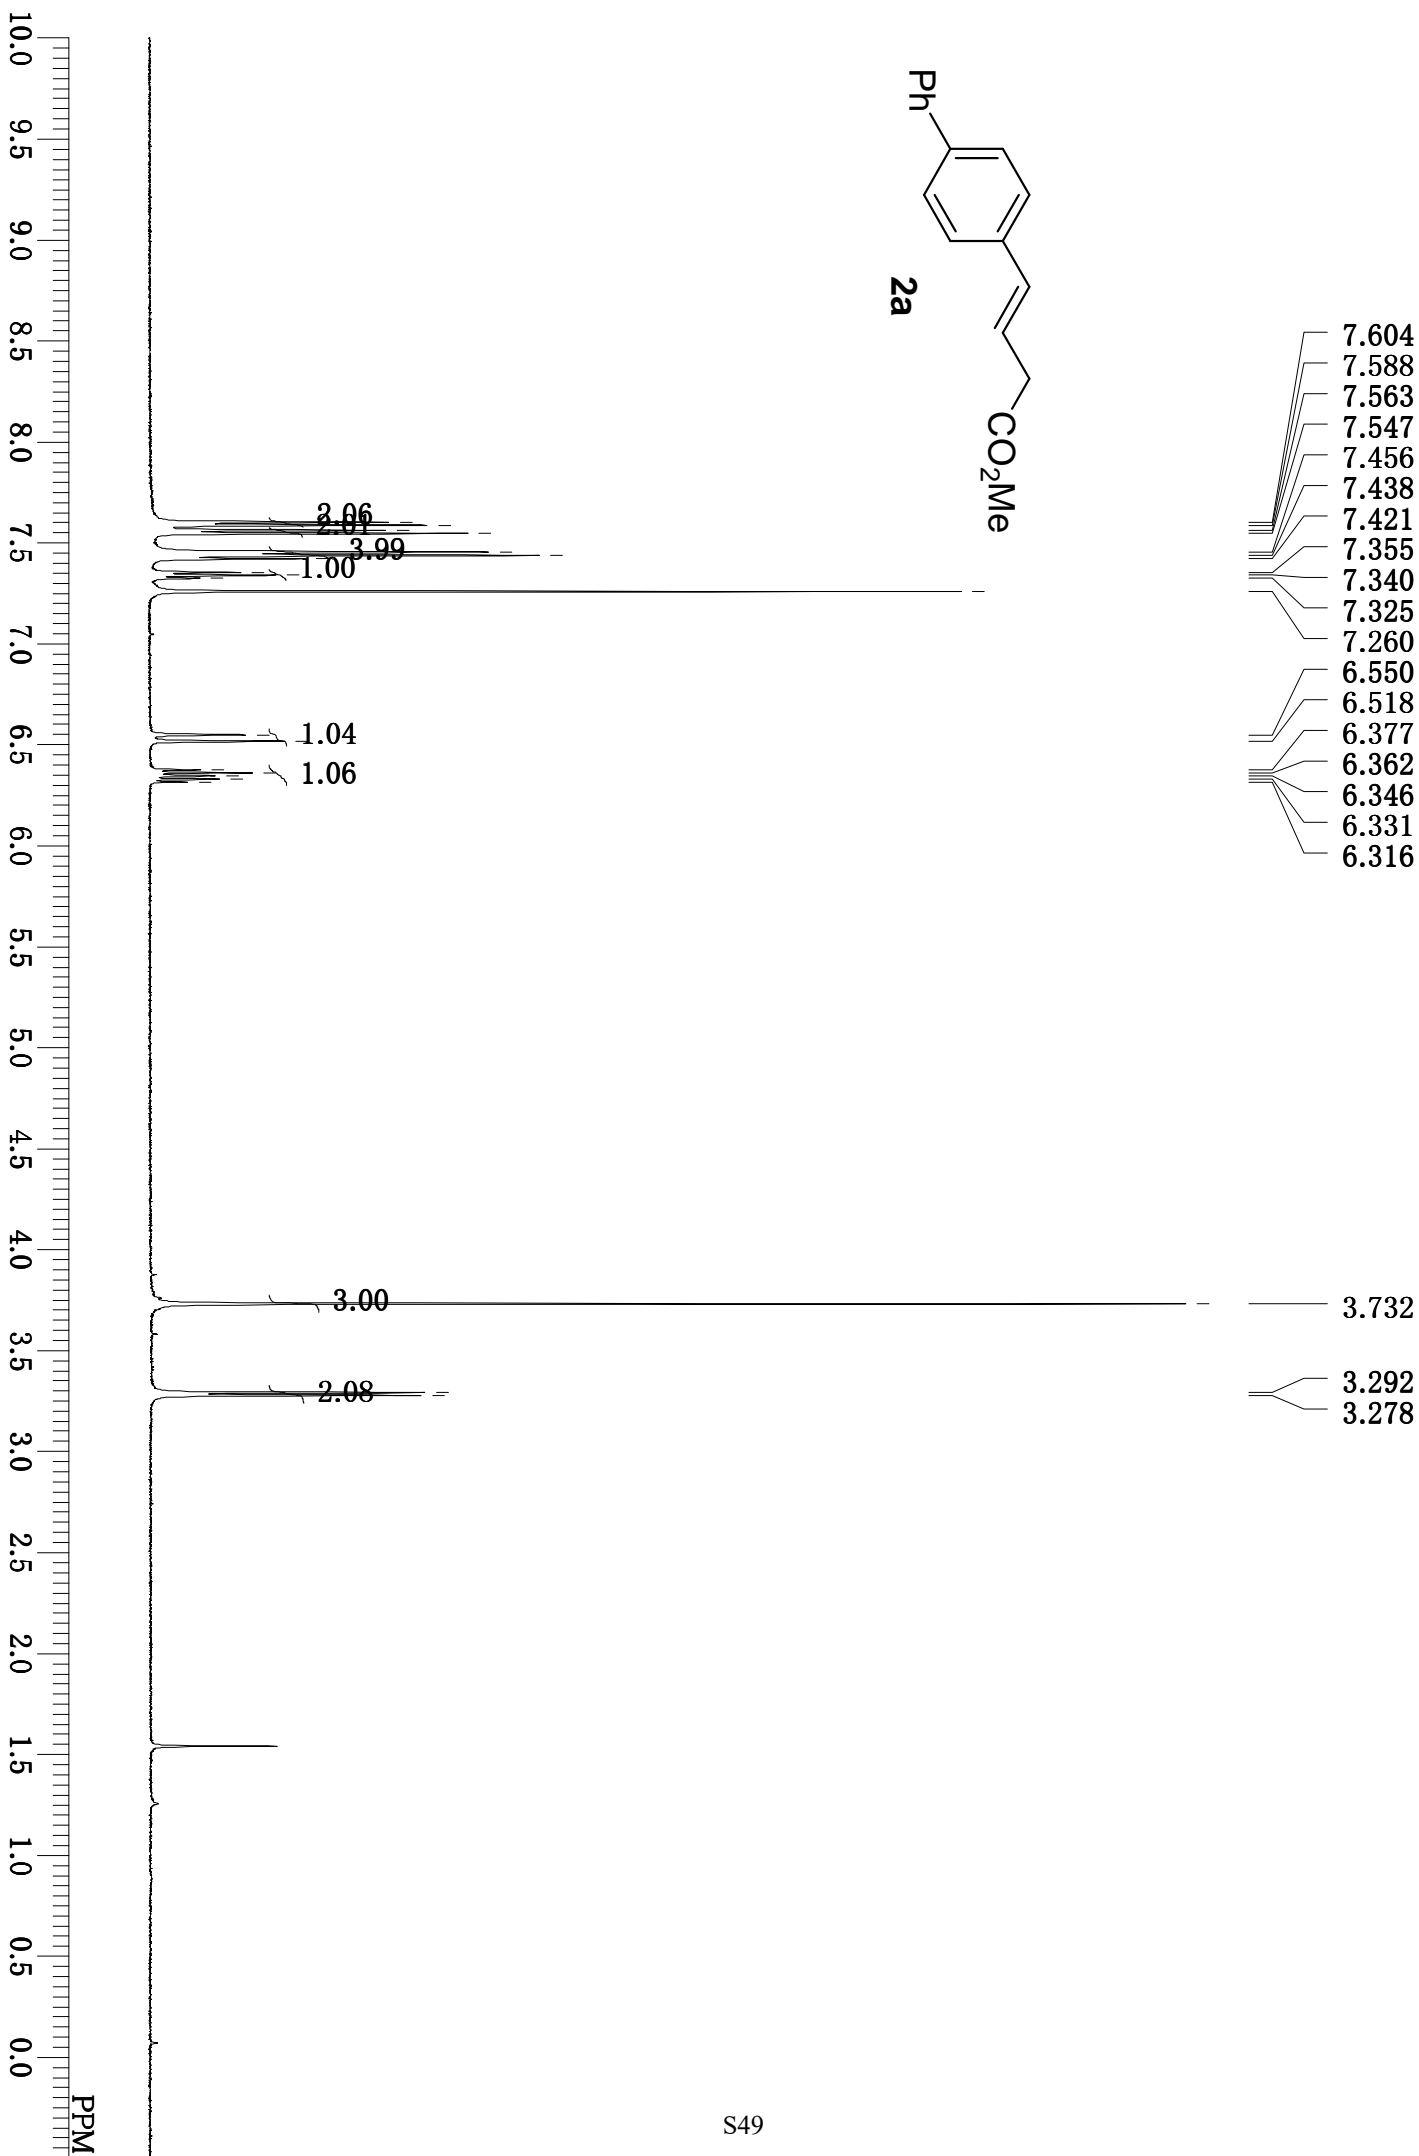

125 MHz, CDCl<sub>3</sub>

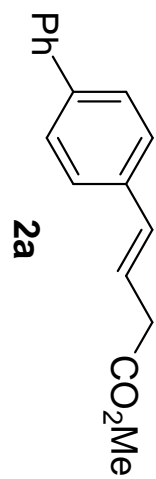

171.954

140.640  
140.287  
135.813  
133.000  
128.745  
127.267  
127.200  
126.885  
126.685  
121.735

77.000

51.924

38.255



500 MHz, CDCl<sub>3</sub>

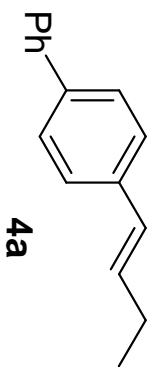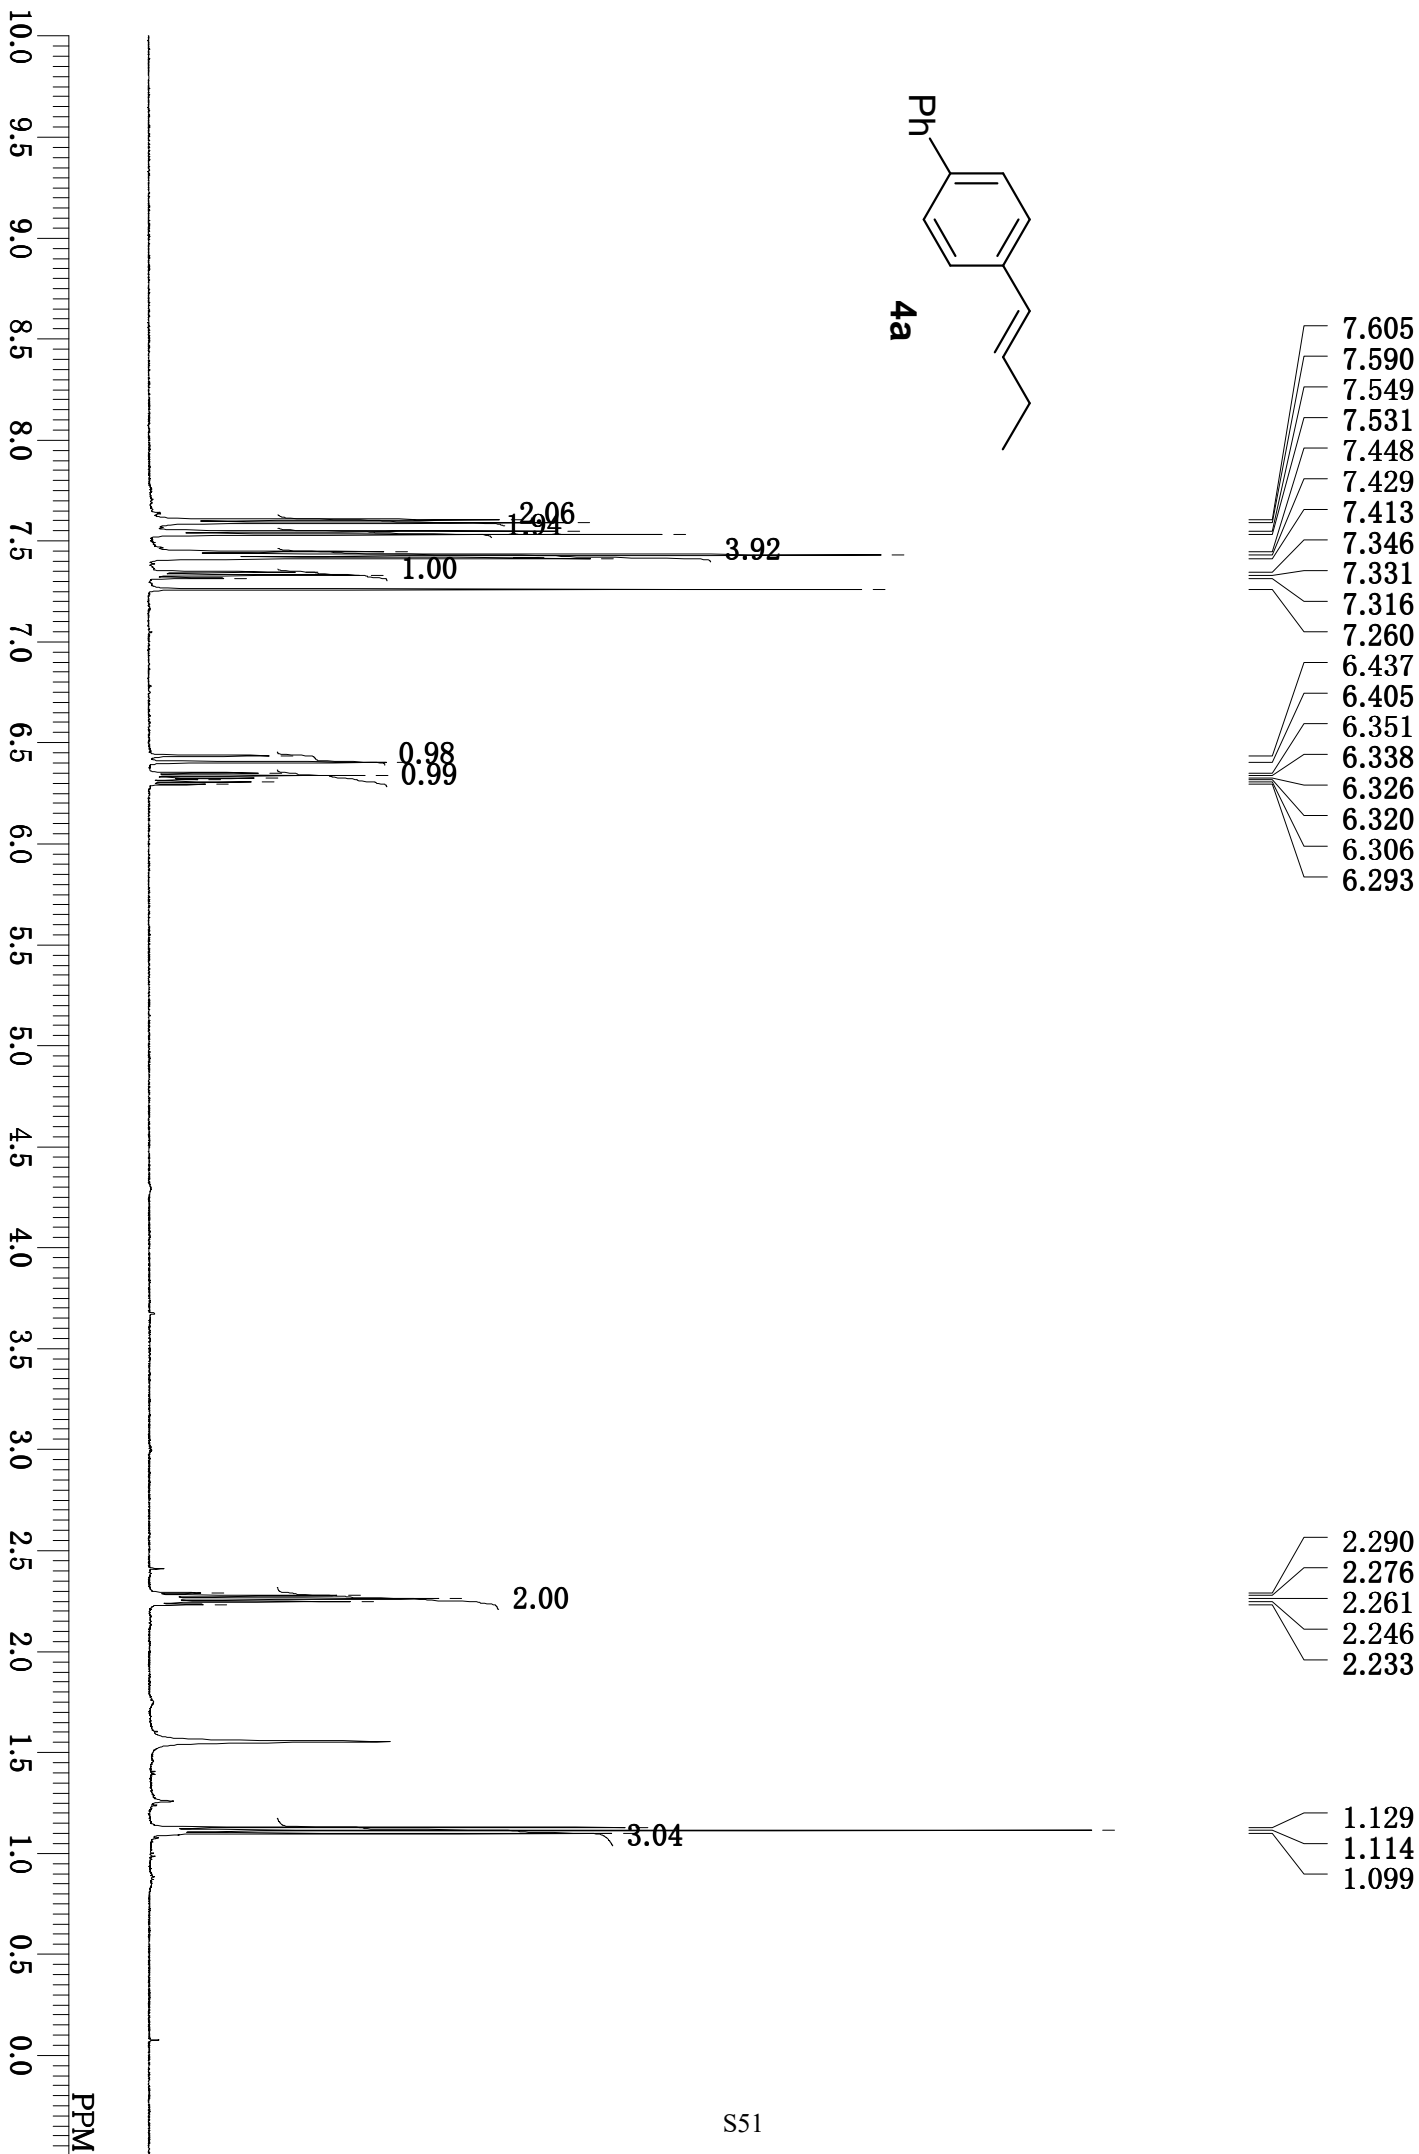

125 MHz, CDCl<sub>3</sub>

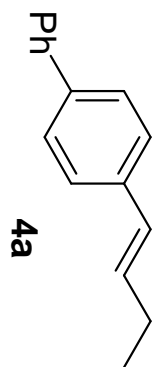

140.869  
139.486  
137.006  
132.856  
128.726  
128.326  
127.162  
127.114  
126.876  
126.294

77.000

26.132

13.656



500 MHz, acetone-d<sub>6</sub>

7.675  
7.660  
7.647  
7.631  
7.540  
7.524  
7.470  
7.454  
7.439  
7.364  
7.349  
7.334  
6.617  
6.586  
6.470  
6.456  
6.442  
6.425  
6.410

3.287  
3.273

2.050

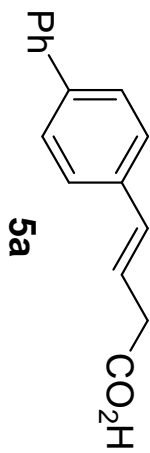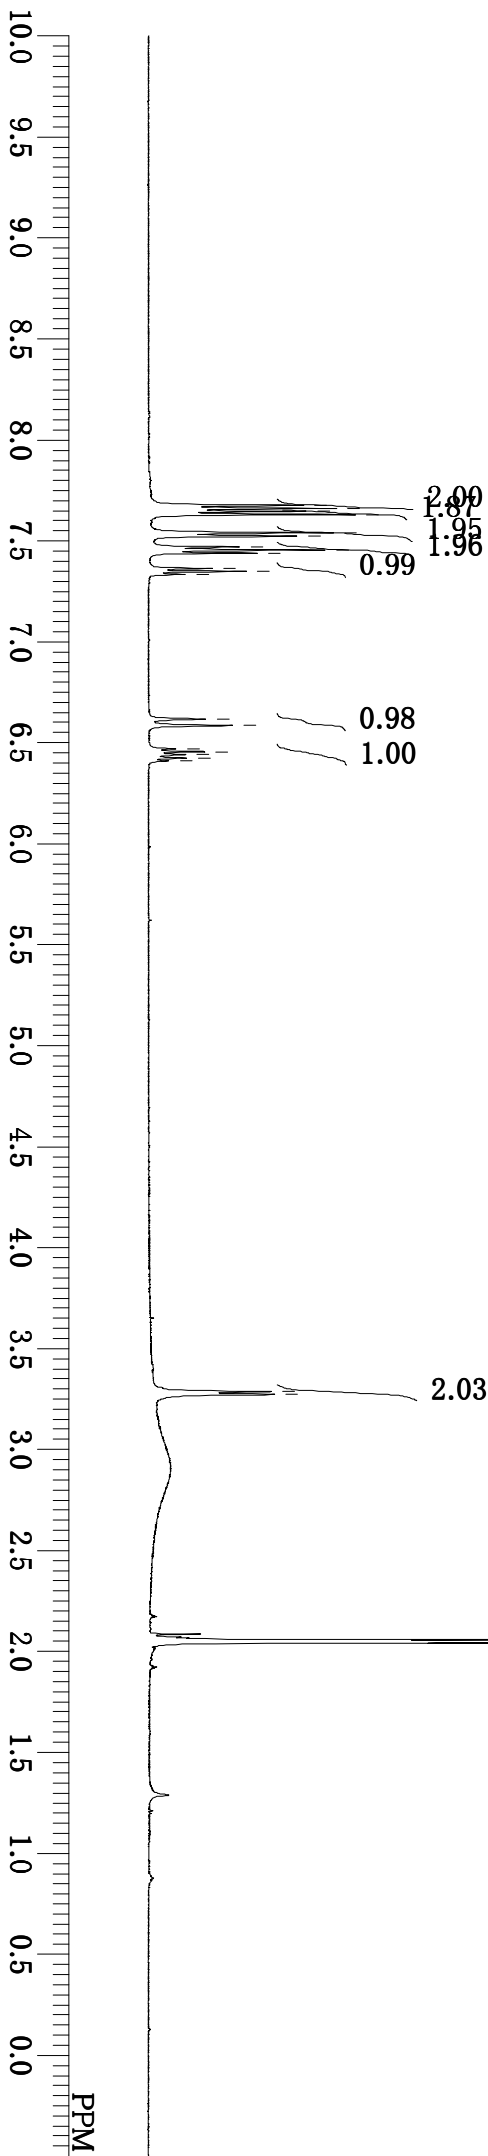

125 MHz, acetone-d<sub>6</sub>

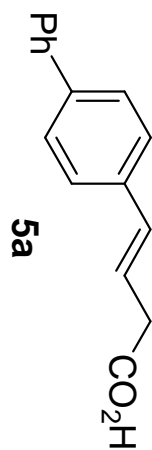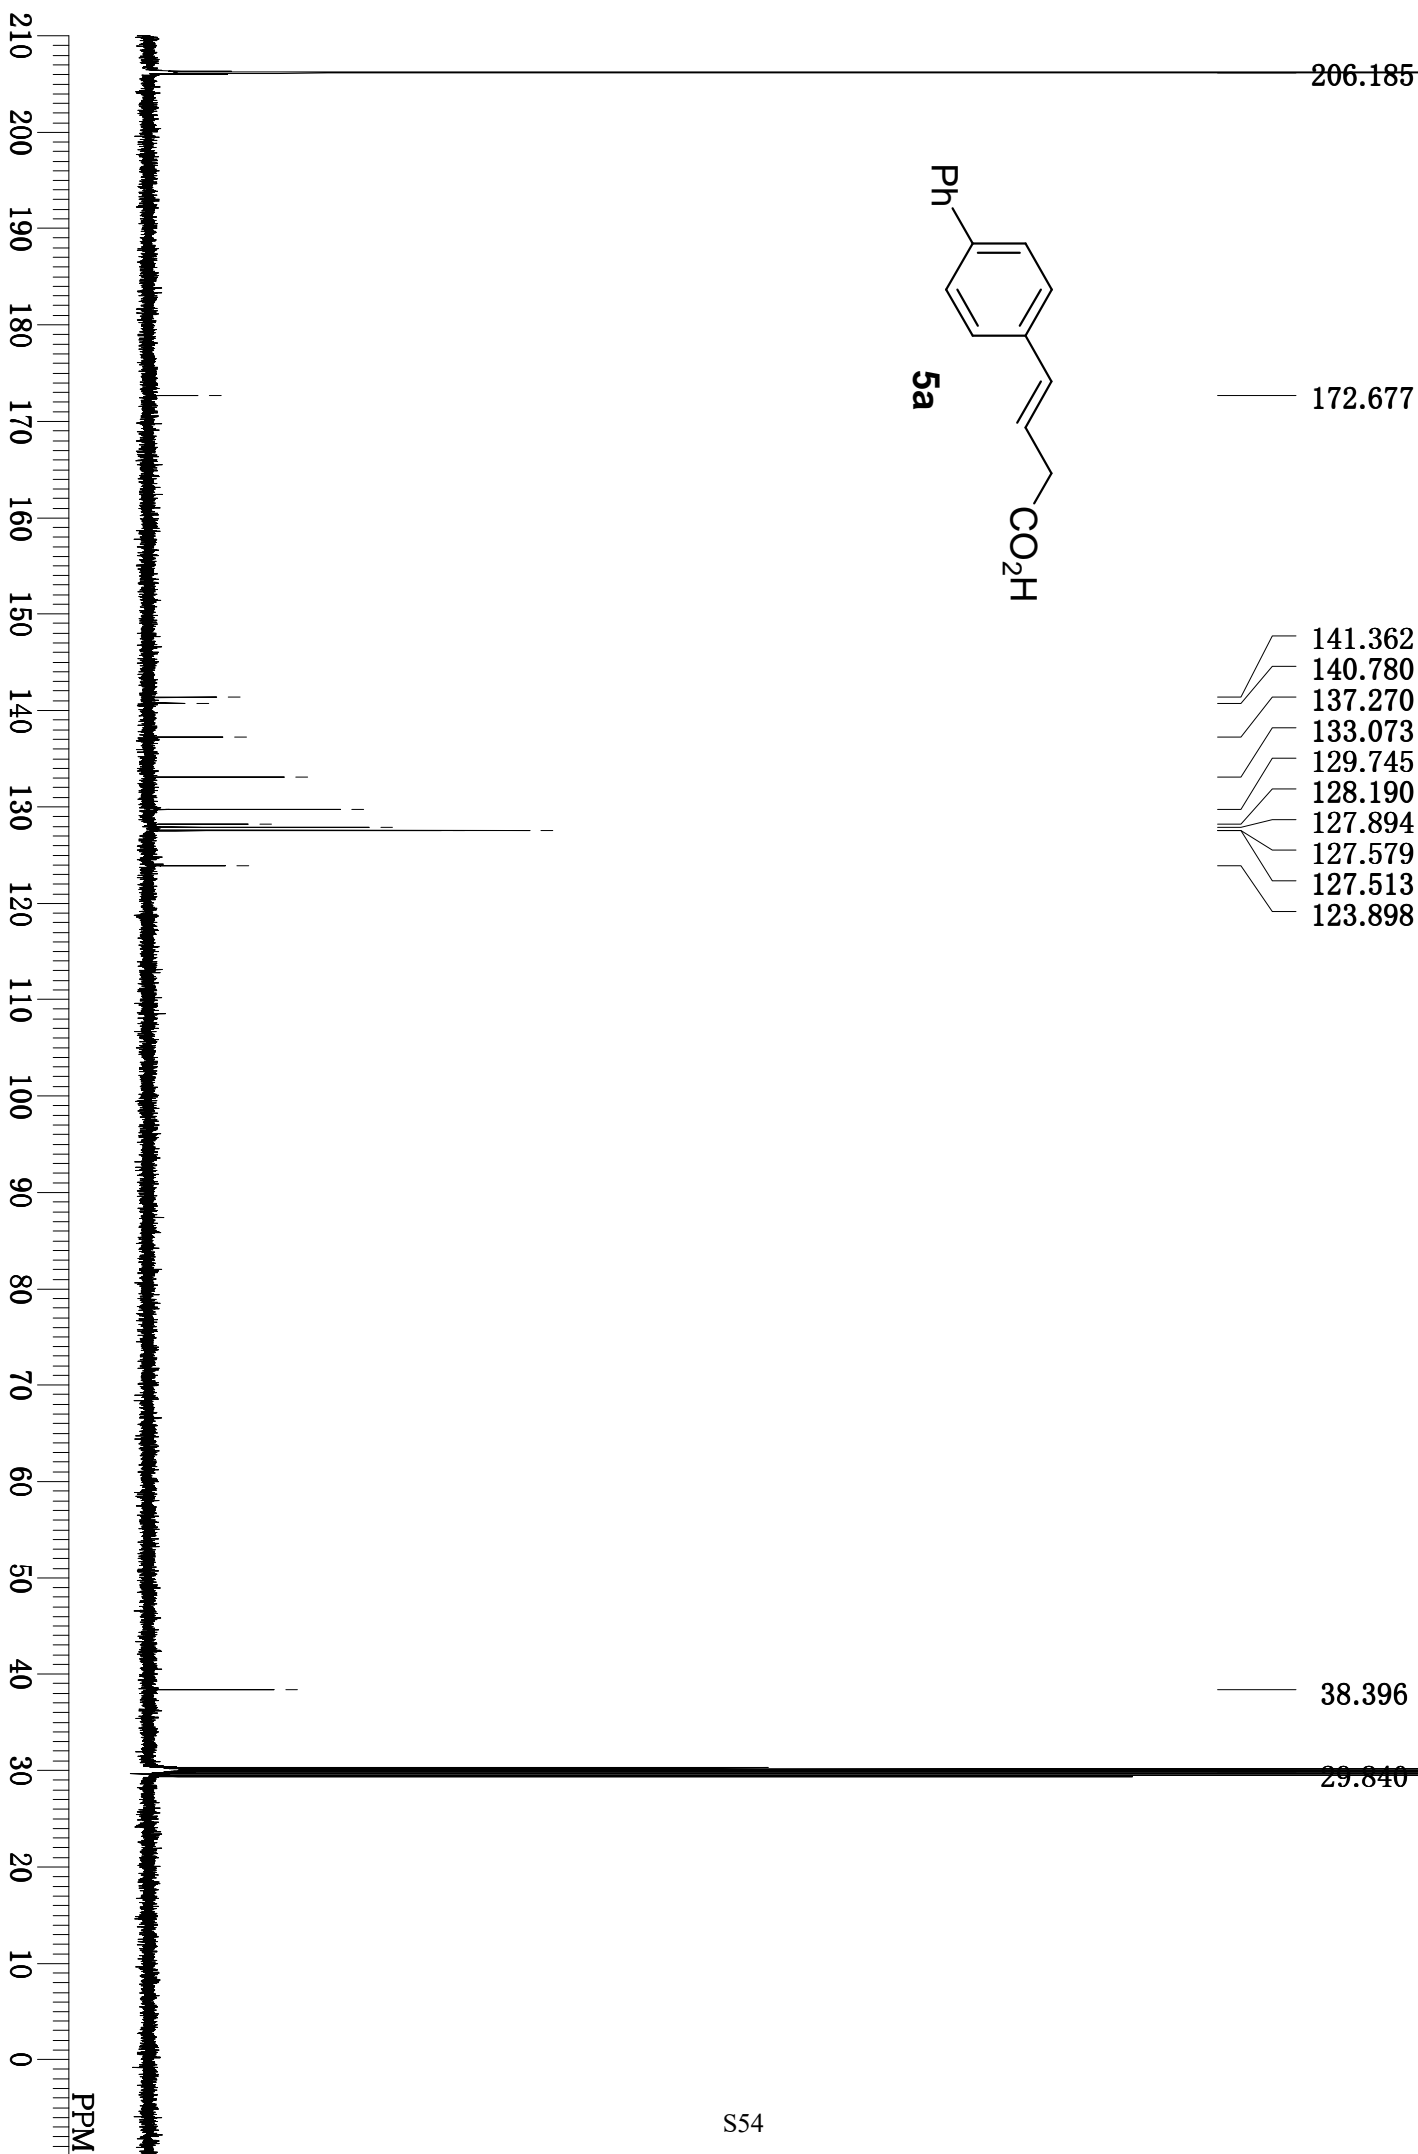

500 MHz, CDCl<sub>3</sub>

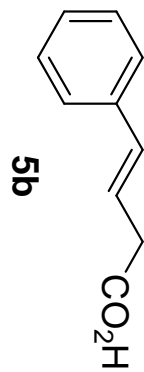

7.392  
7.377  
7.334  
7.320  
7.305  
7.260  
7.246  
7.231  
6.544  
6.513  
6.323  
6.309  
6.295  
6.277  
6.264

3.321  
3.318  
3.306  
3.303

10.0  
9.5  
9.0  
8.5  
8.0  
7.5  
7.0  
6.5  
6.0  
5.5  
5.0  
4.5  
4.0  
3.5  
3.0  
2.5  
2.0  
1.5  
1.0  
0.5  
0.0  
PPM

125 MHz, CDCl<sub>3</sub>

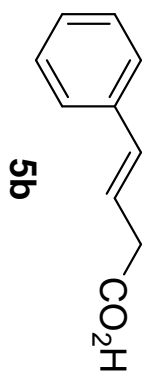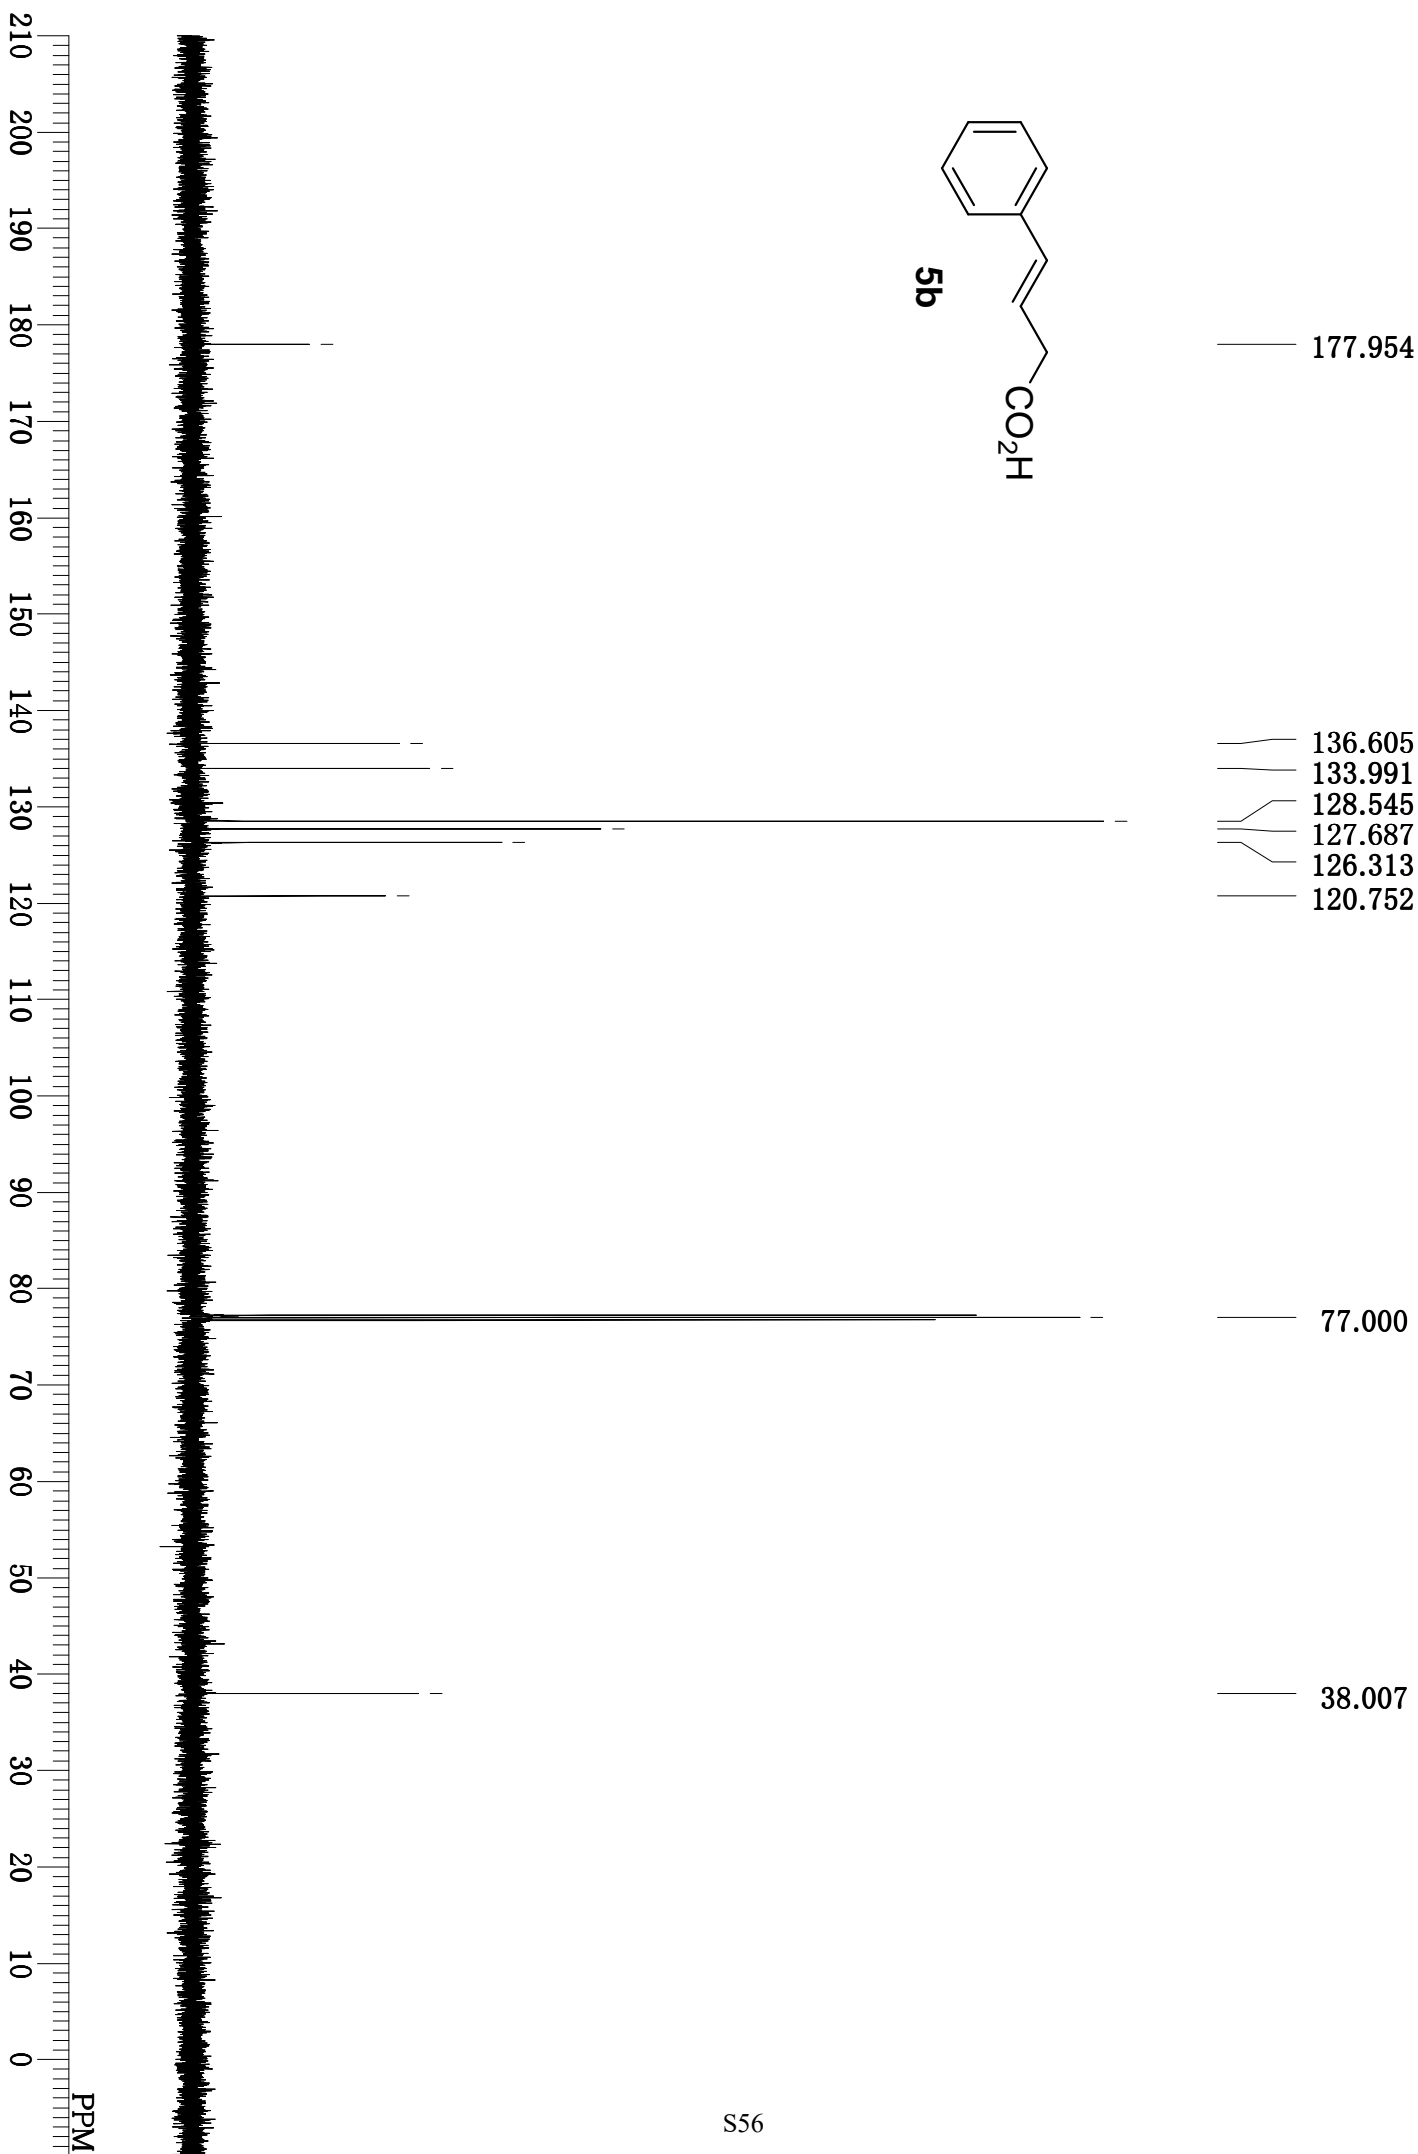



500 MHz, CDCl<sub>3</sub>

7.633  
7.629  
7.615  
7.429  
7.416  
7.401  
7.369  
7.367  
7.354  
7.349  
7.345  
7.341  
7.336  
7.331  
7.326  
7.321  
7.316  
7.313  
7.302  
7.298  
7.290  
7.286  
7.283  
7.276  
7.271  
7.260  
6.521  
6.489  
6.258  
6.243  
6.229  
6.226  
6.212  
6.197

3.222  
3.220  
3.208  
3.206

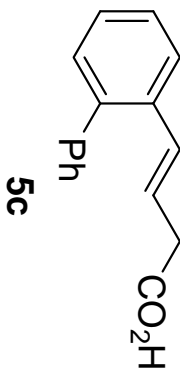

10.0  
9.5  
9.0  
8.5  
8.0  
7.5  
7.0  
6.5  
6.0  
5.5  
5.0  
4.5  
4.0  
3.5  
3.0  
2.5  
2.0  
1.5  
1.0  
0.5  
0.0  
PPM

1.01

2.01

1.21

4.69

1.00

1.03

2.00

125 MHz, CDCl<sub>3</sub>

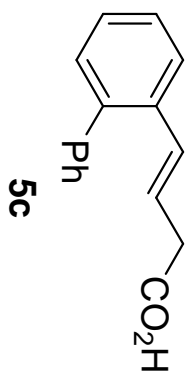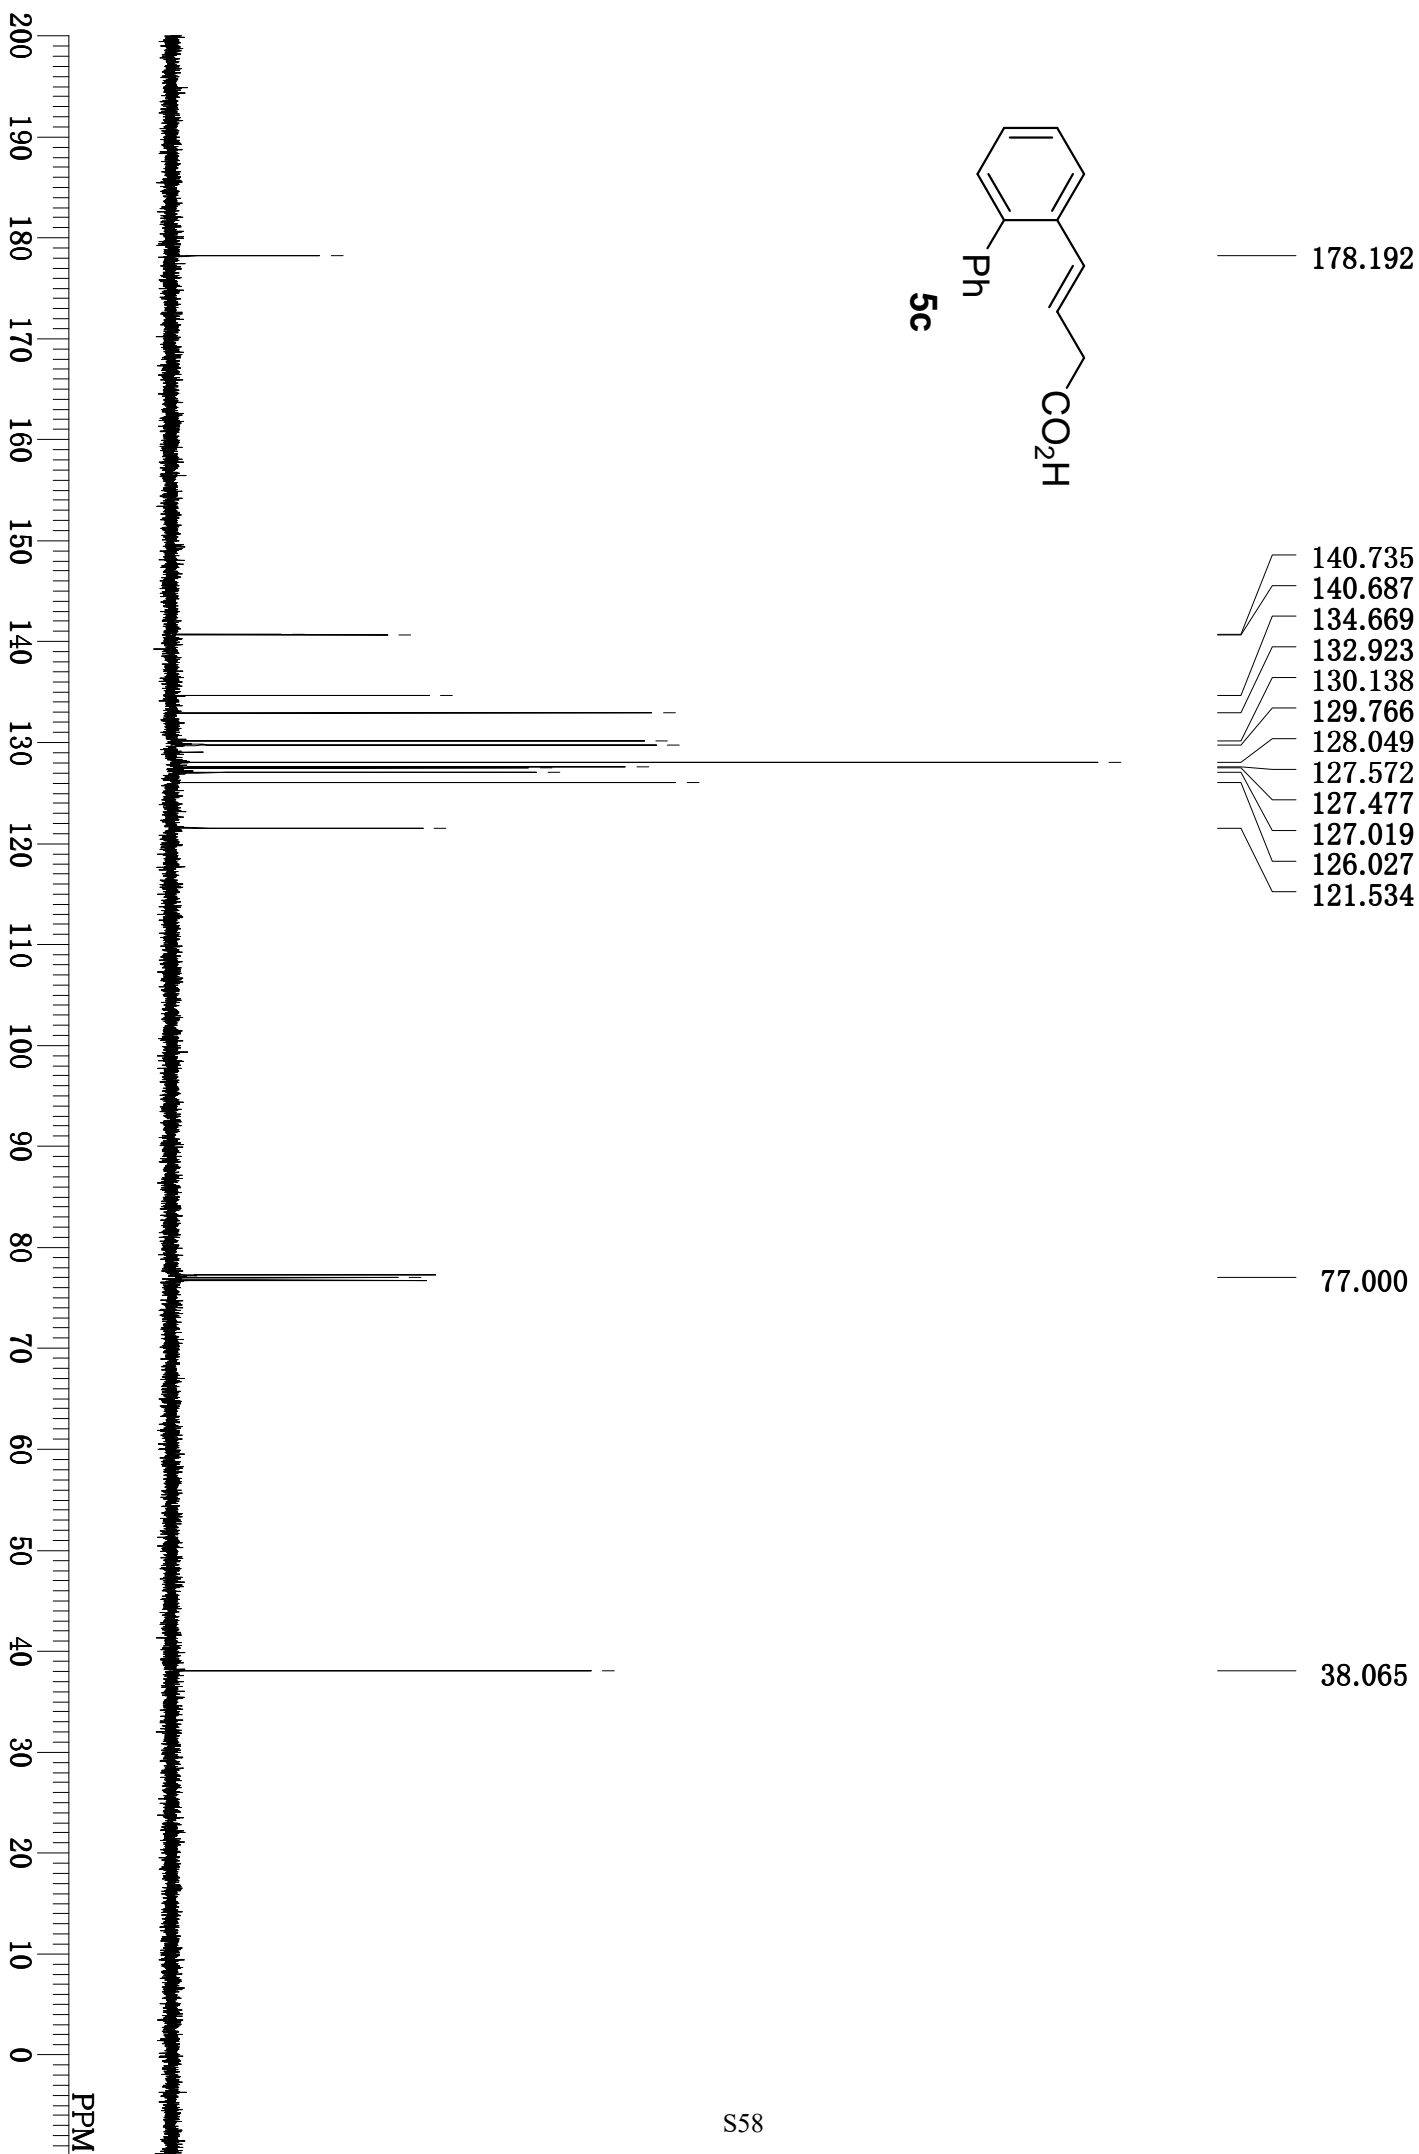

500 MHz, acetone-d<sub>6</sub>

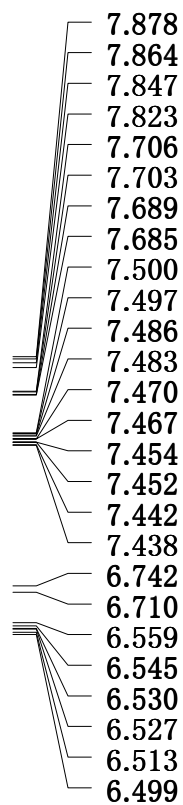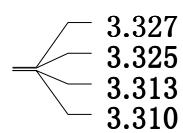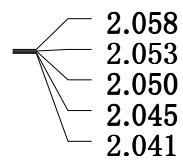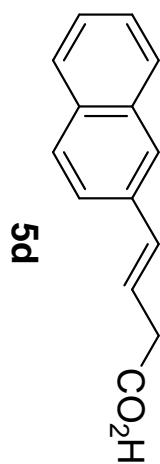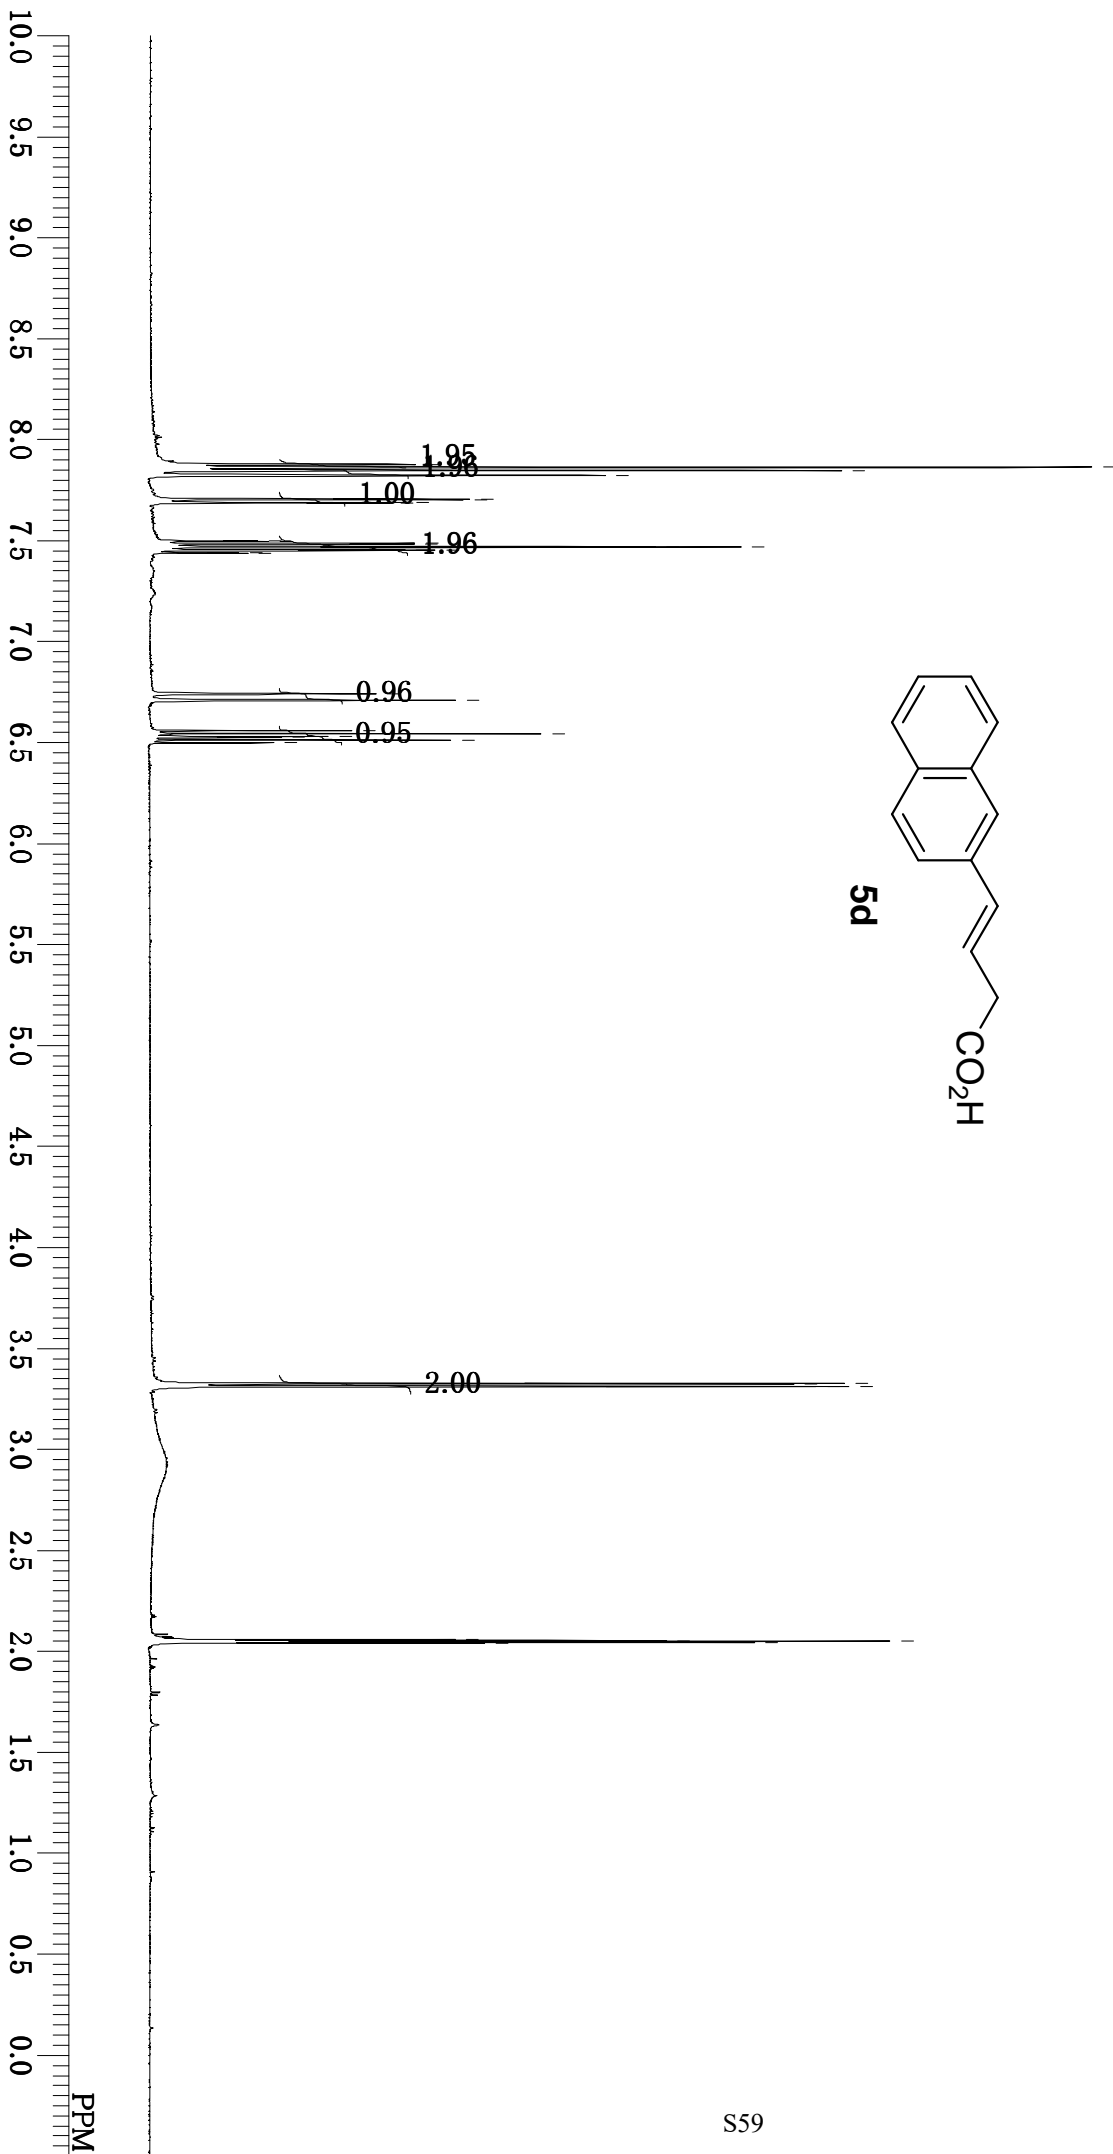

125 MHz, acetone-d<sub>6</sub>

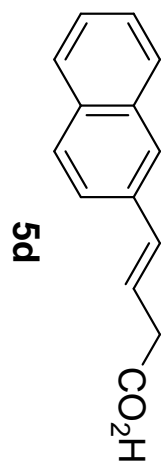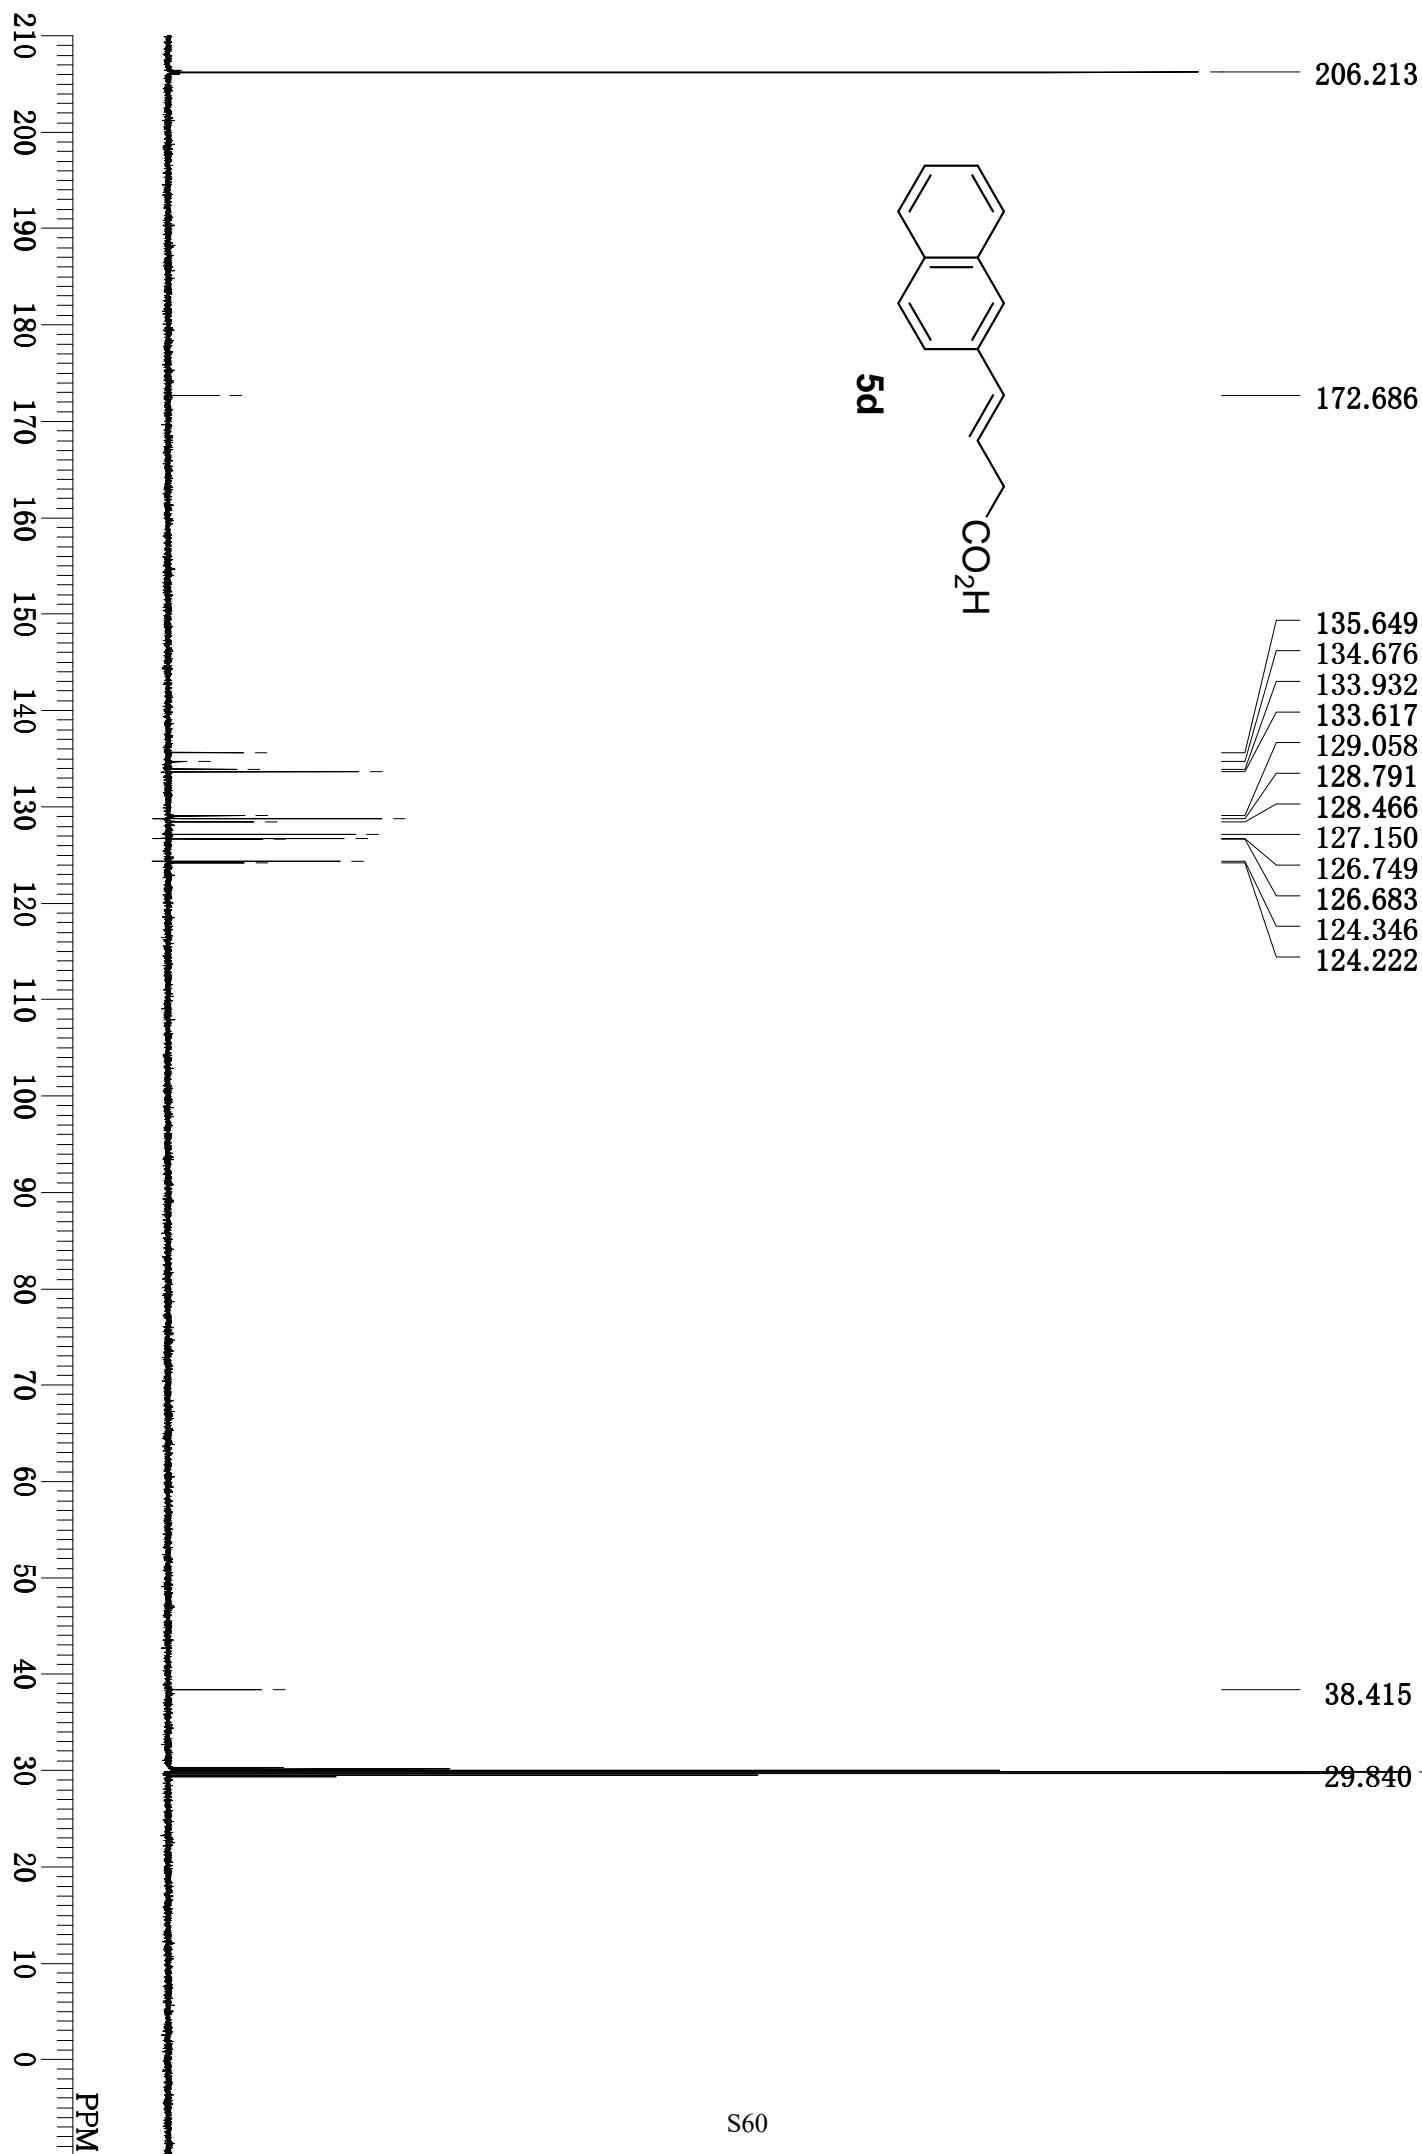

500 MHz, CDCl<sub>3</sub>

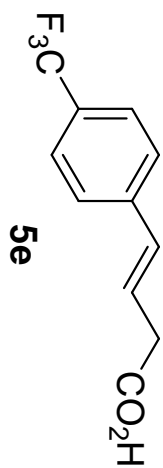

7.575  
7.559  
7.475  
7.459  
7.260  
6.573  
6.541  
6.423  
6.409  
6.394  
6.377  
6.362

3.349  
3.335

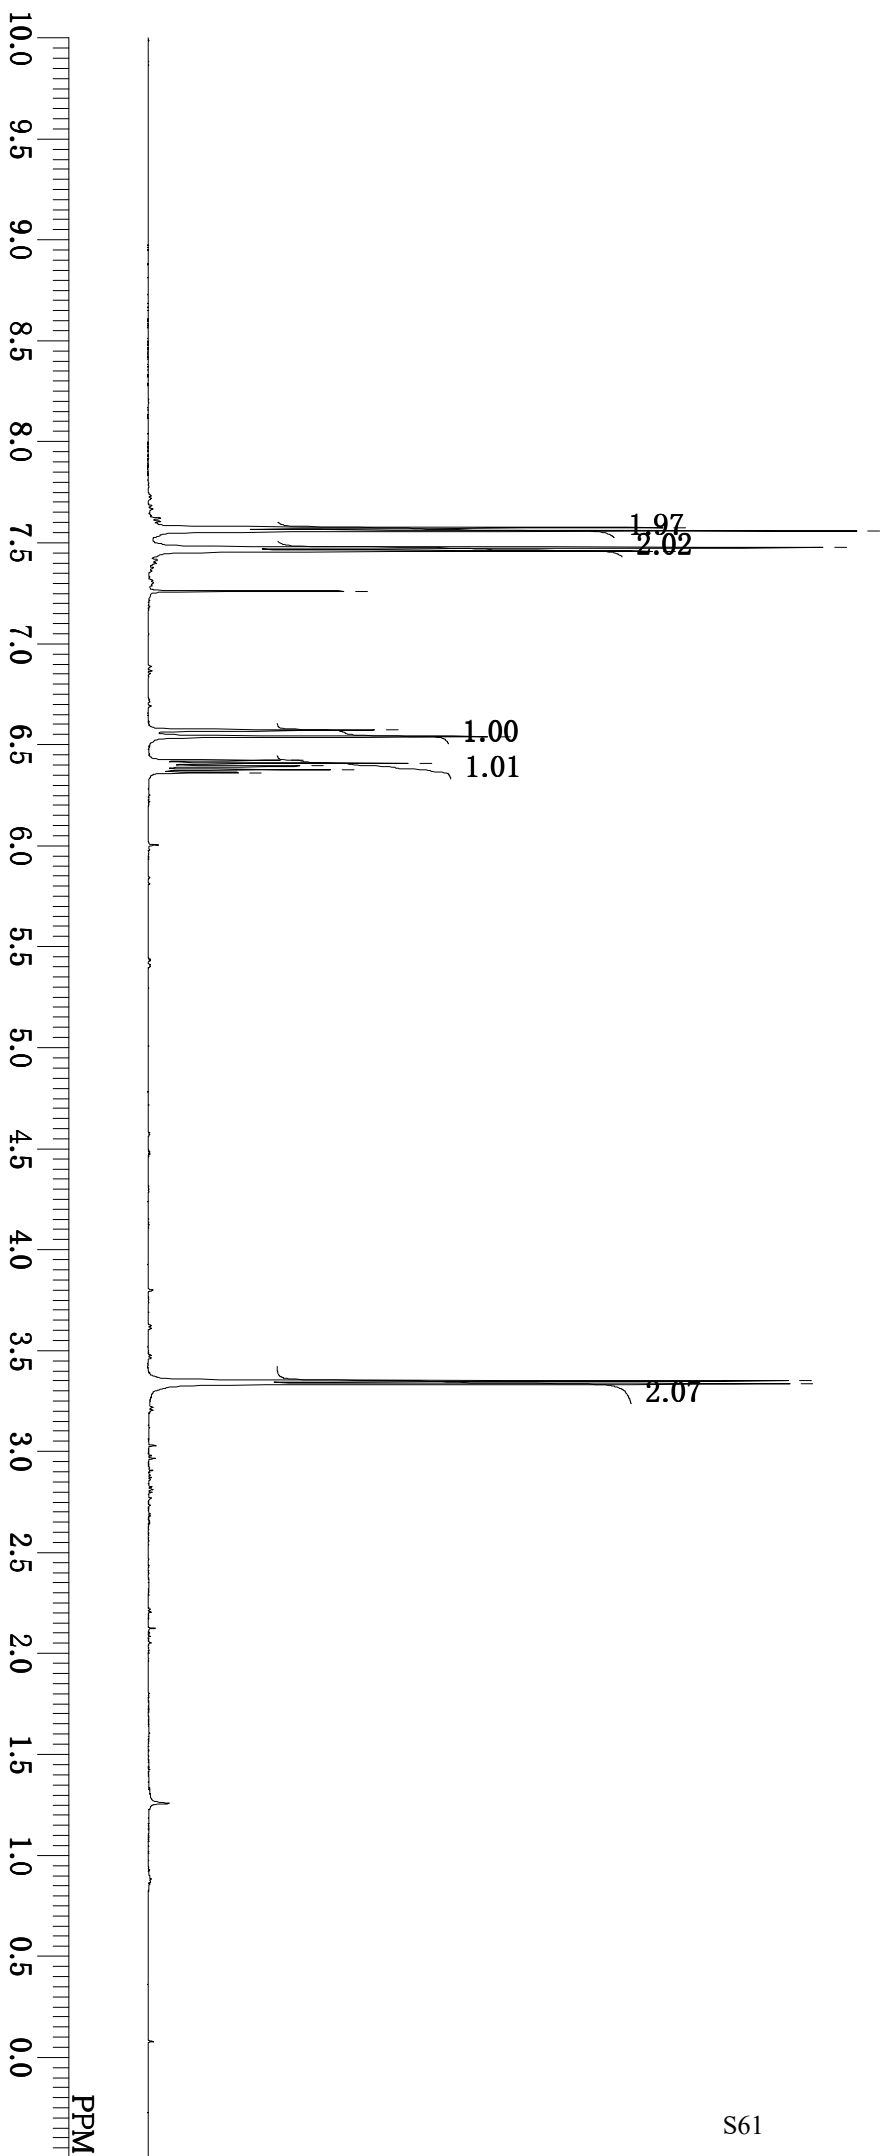

125 MHz, CDCl<sub>3</sub>

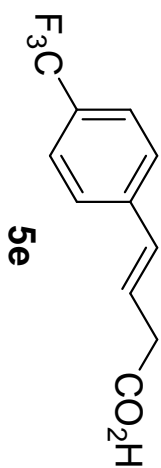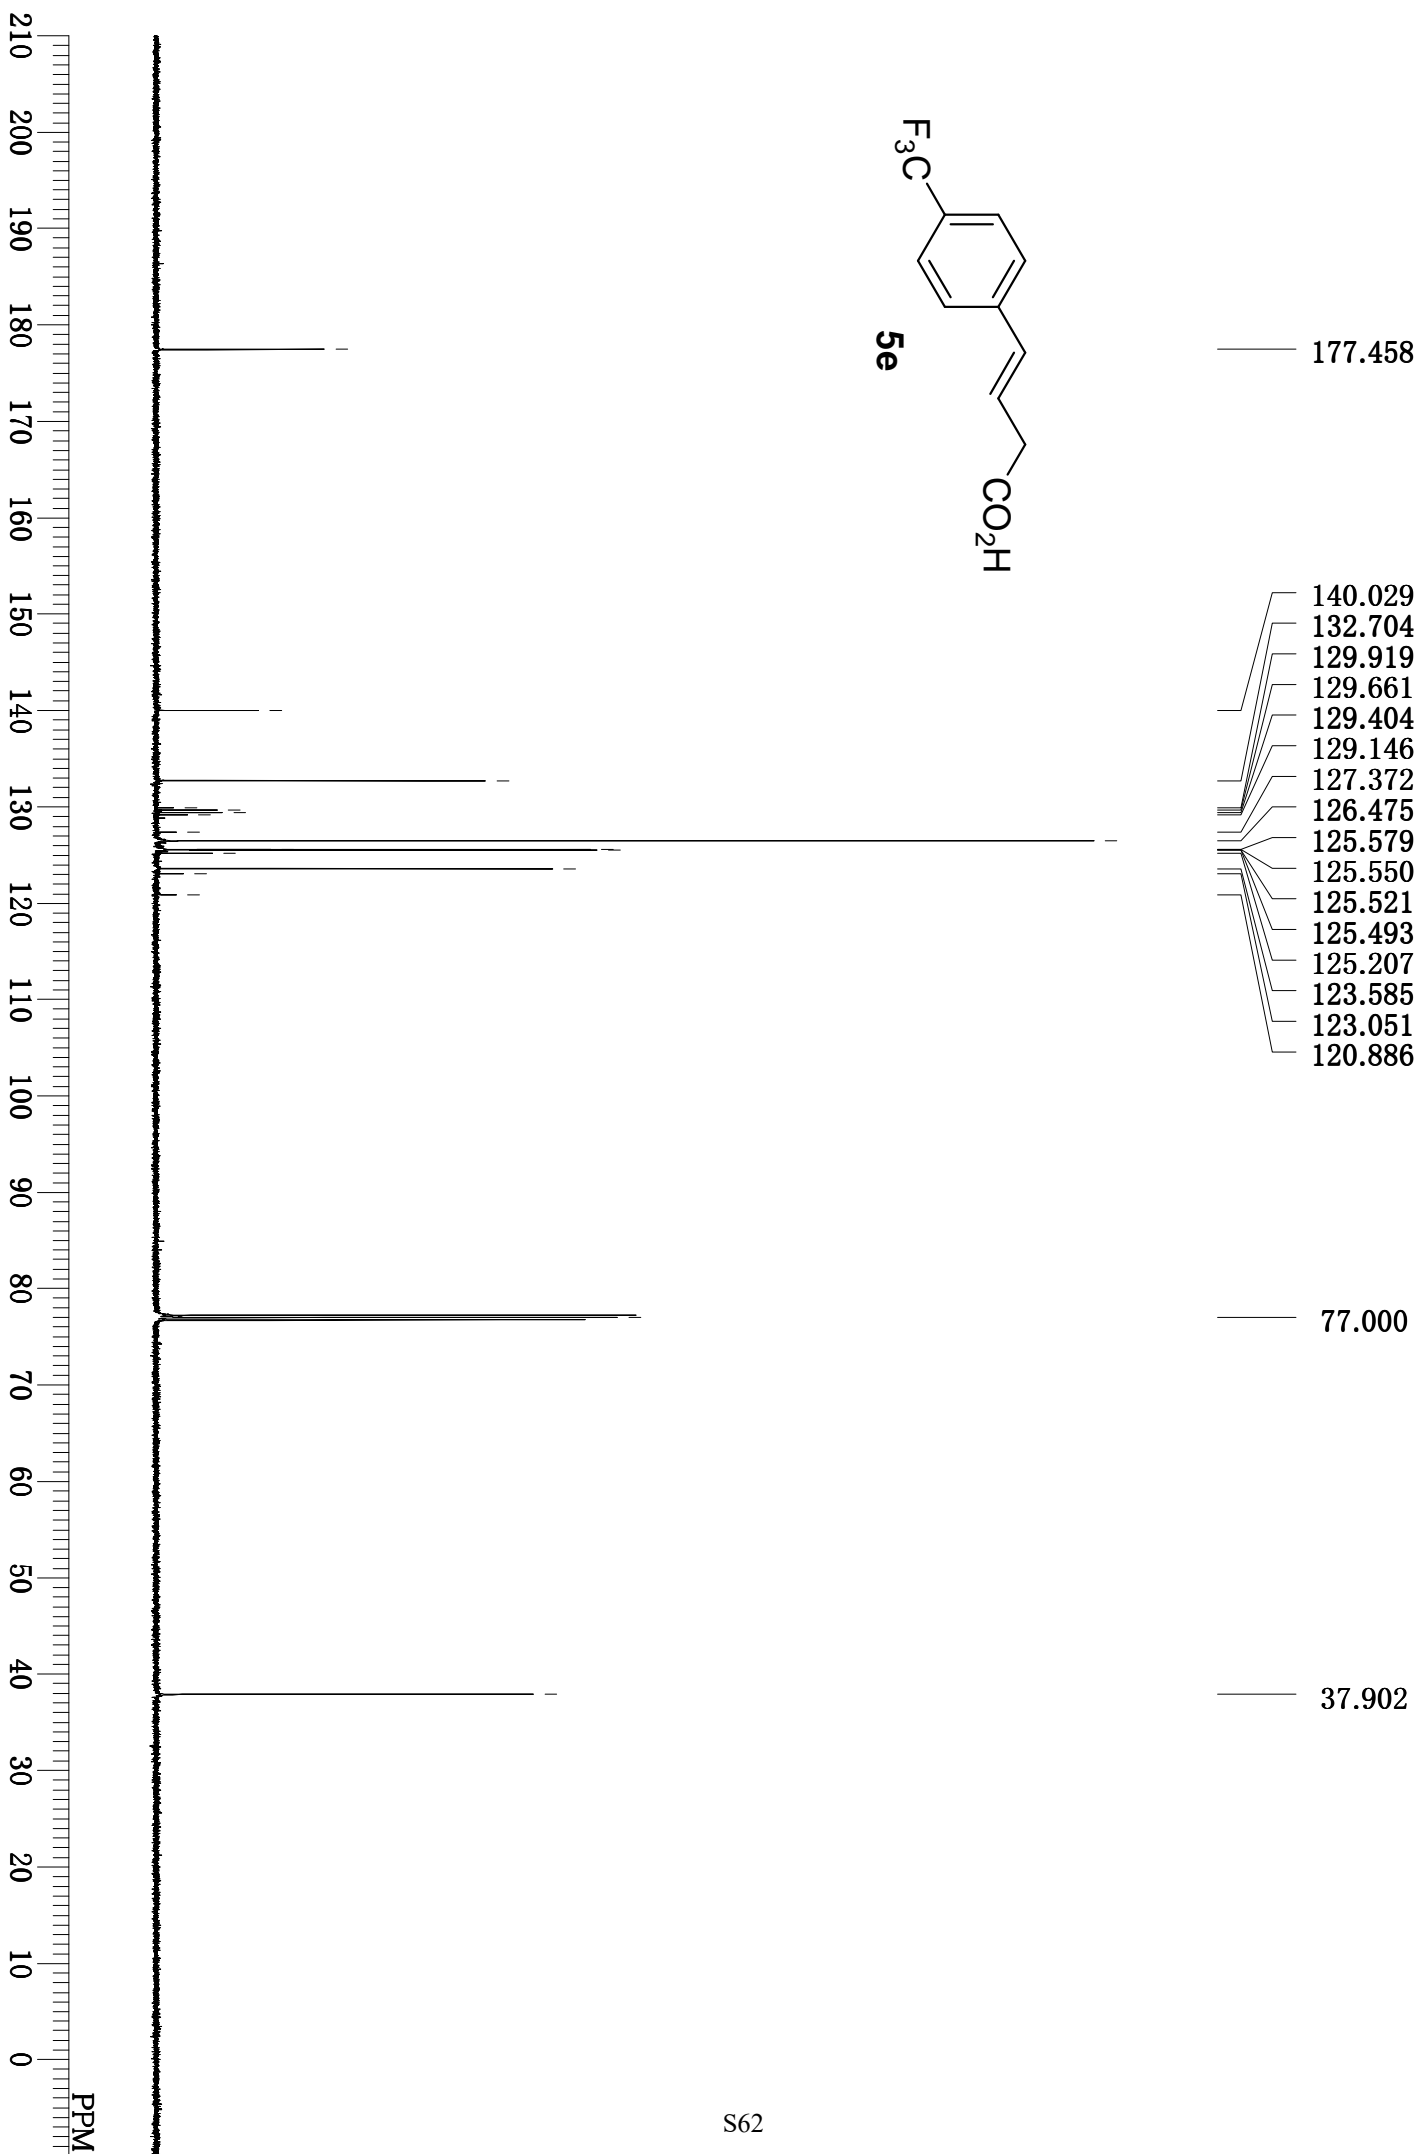

500 MHz, CDCl<sub>3</sub>

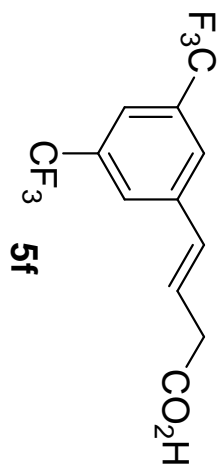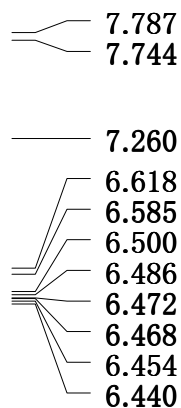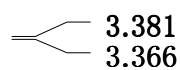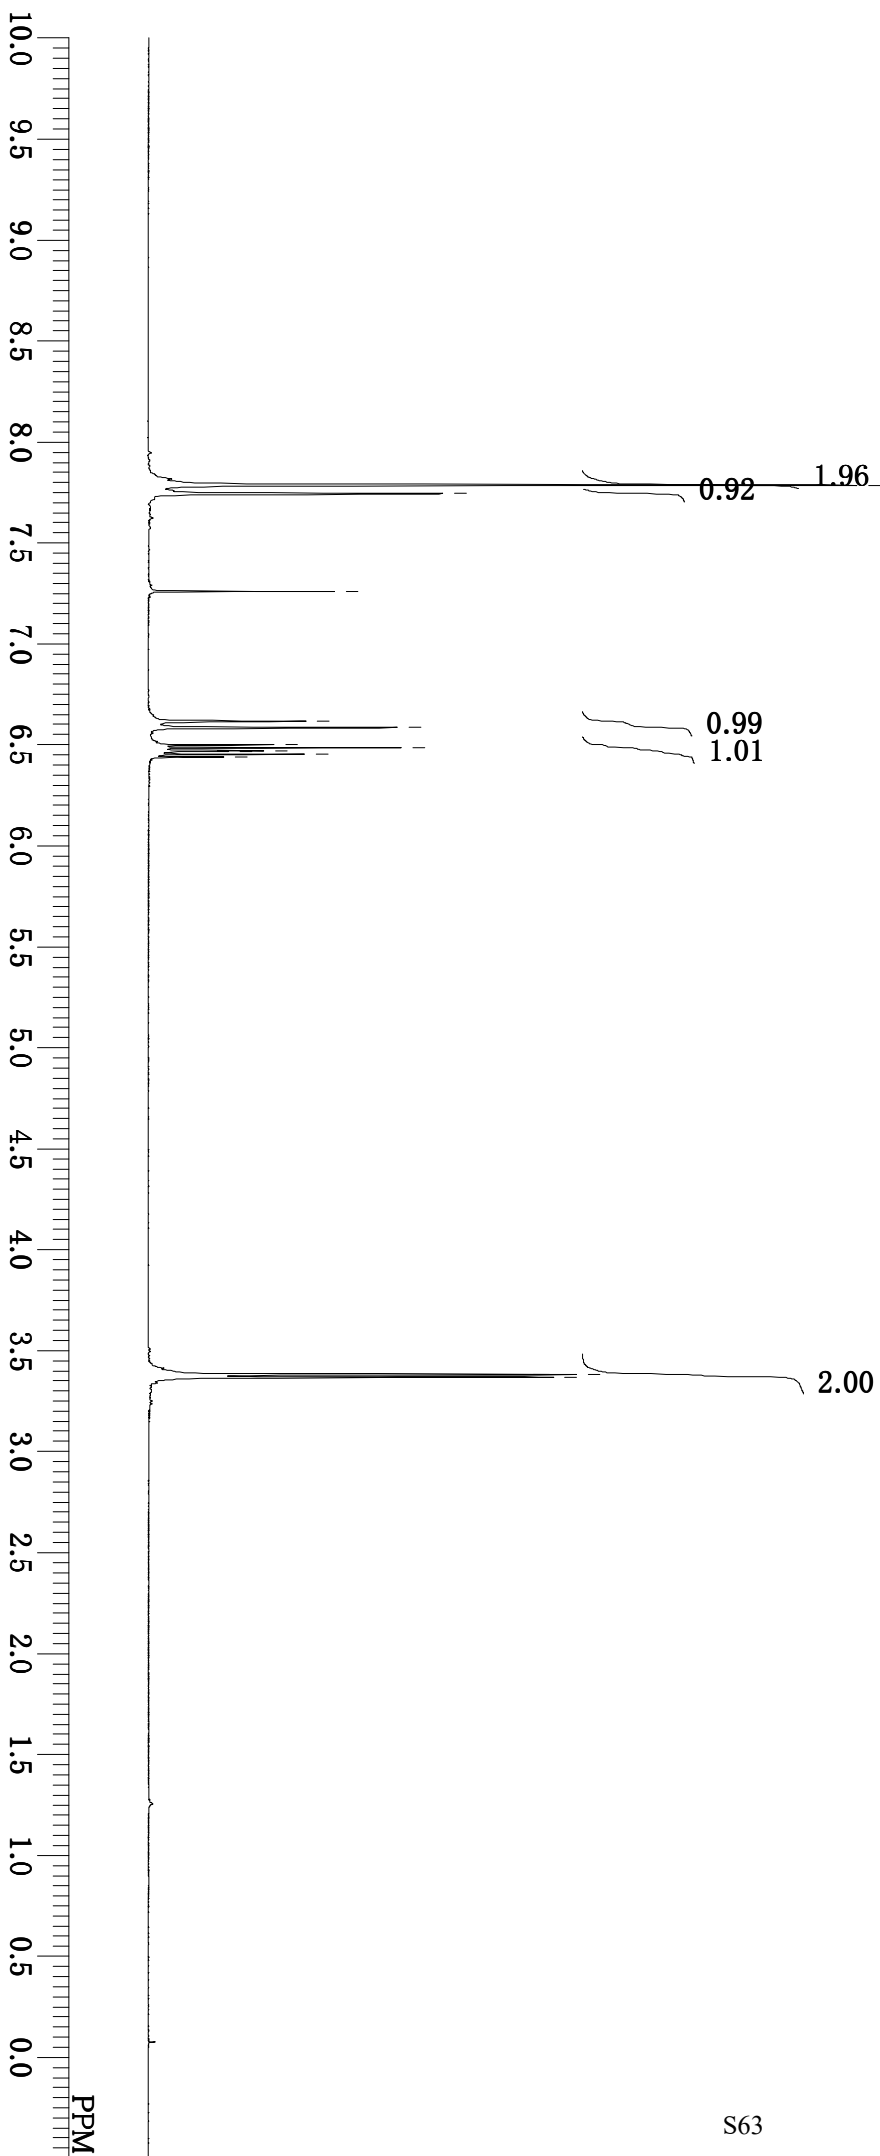

125 MHz, CDCl<sub>3</sub>

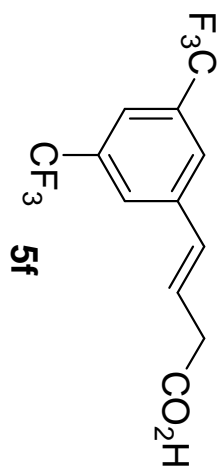

177.105

138.589  
132.380  
132.112  
131.845  
131.588  
131.378  
126.494  
126.208  
126.180  
126.151  
125.159  
124.320  
122.154  
121.220  
121.191  
121.153  
121.124  
121.096  
119.980

77.000

37.693





500 MHz, CDCl<sub>3</sub>

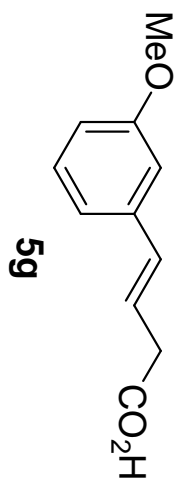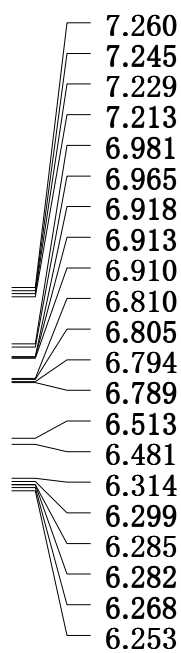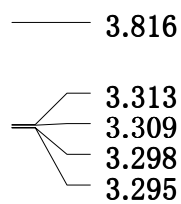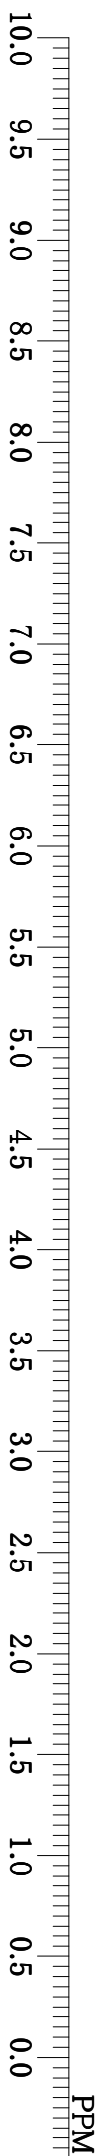

1.03

1.01

1.01

1.01

1.03

3.09

2.00

125 MHz, CDCl<sub>3</sub>

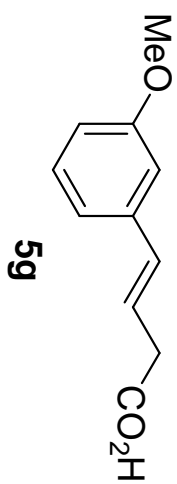

177.858

159.755

138.045

133.887

129.528

121.105

119.007

113.408

111.548

77.000

55.205

37.950



500 MHz, CDCl<sub>3</sub>

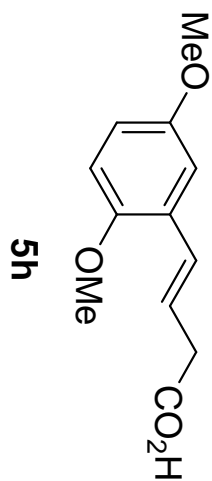

7.260  
7.006  
7.000  
6.834  
6.802  
6.789  
6.784  
6.778  
6.765  
6.760  
6.316  
6.303  
6.288  
6.271  
6.256

3.799  
3.785  
3.329  
3.315

10.0  
9.5  
9.0  
8.5  
8.0  
7.5  
7.0  
6.5  
6.0  
5.5  
5.0  
4.5  
4.0  
3.5  
3.0  
2.5  
2.0  
1.5  
1.0  
0.5  
0.0  
PPM

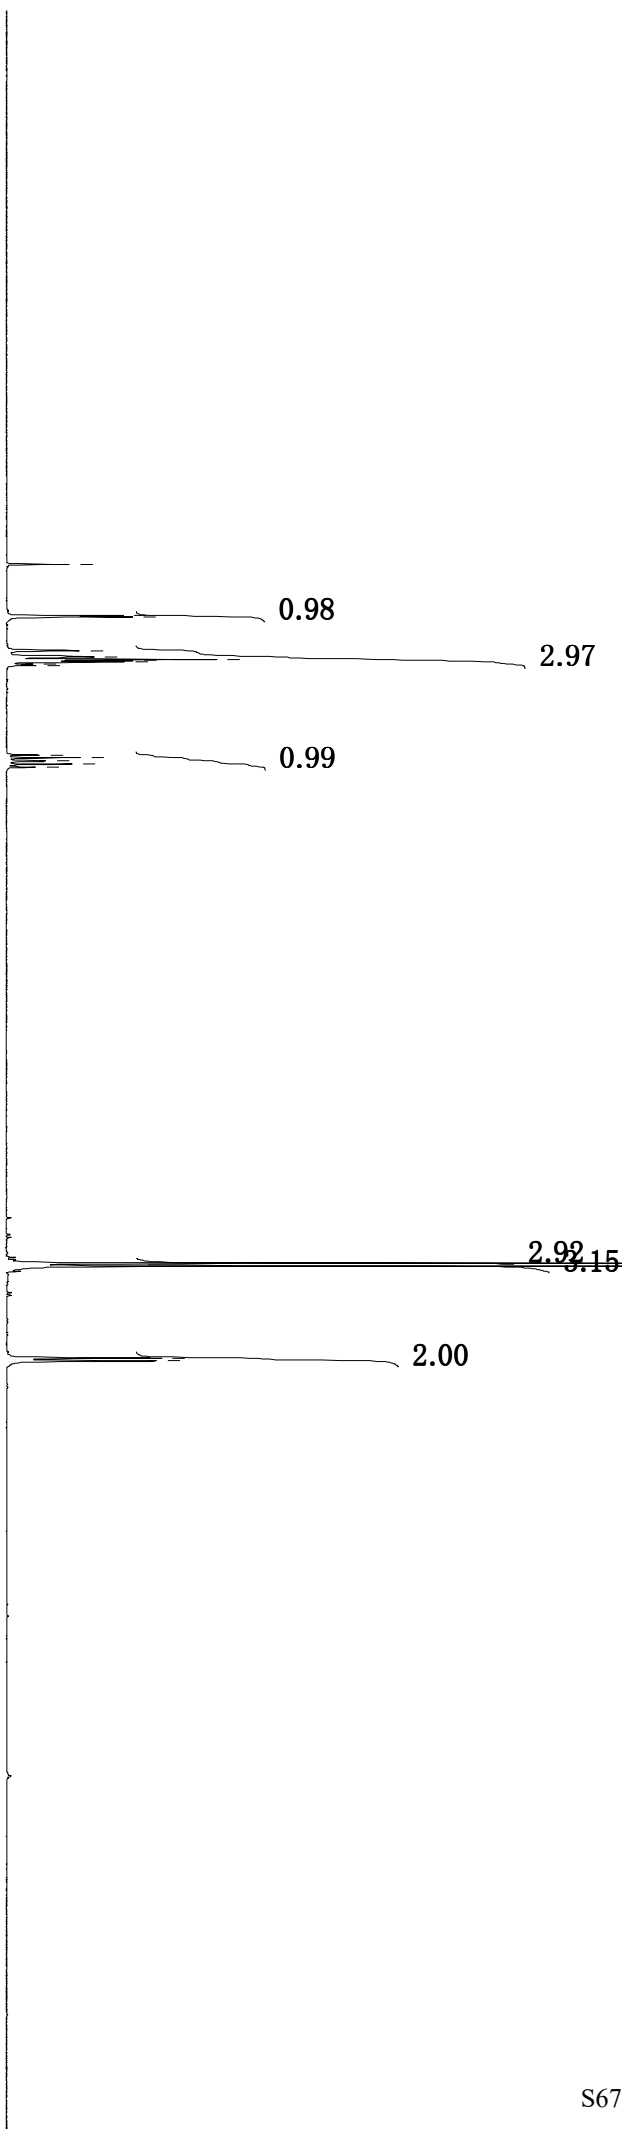

125 MHz, CDCl<sub>3</sub>

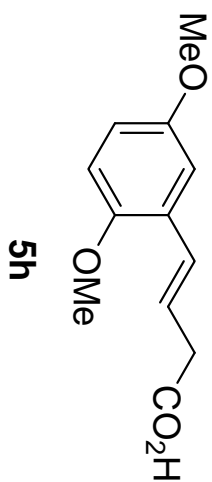

177.963

153.631  
151.036

128.660  
126.466  
121.697

113.866  
112.177  
112.072

77.000

56.159  
55.749

38.379



500 MHz, CDCl<sub>3</sub>

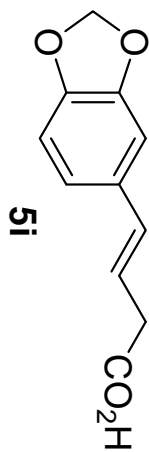

7.260  
6.926  
6.922  
6.807  
6.803  
6.790  
6.787  
6.754  
6.738  
6.440  
6.408  
6.135  
6.121  
6.107  
6.103  
6.090  
6.075  
5.949

3.276  
3.272  
3.261  
3.259

10.0  
9.5  
9.0  
8.5  
8.0  
7.5  
7.0  
6.5  
6.0  
5.5  
5.0  
4.5  
4.0  
3.5  
3.0  
2.5  
2.0  
1.5  
1.0  
0.5  
0.0

PPM

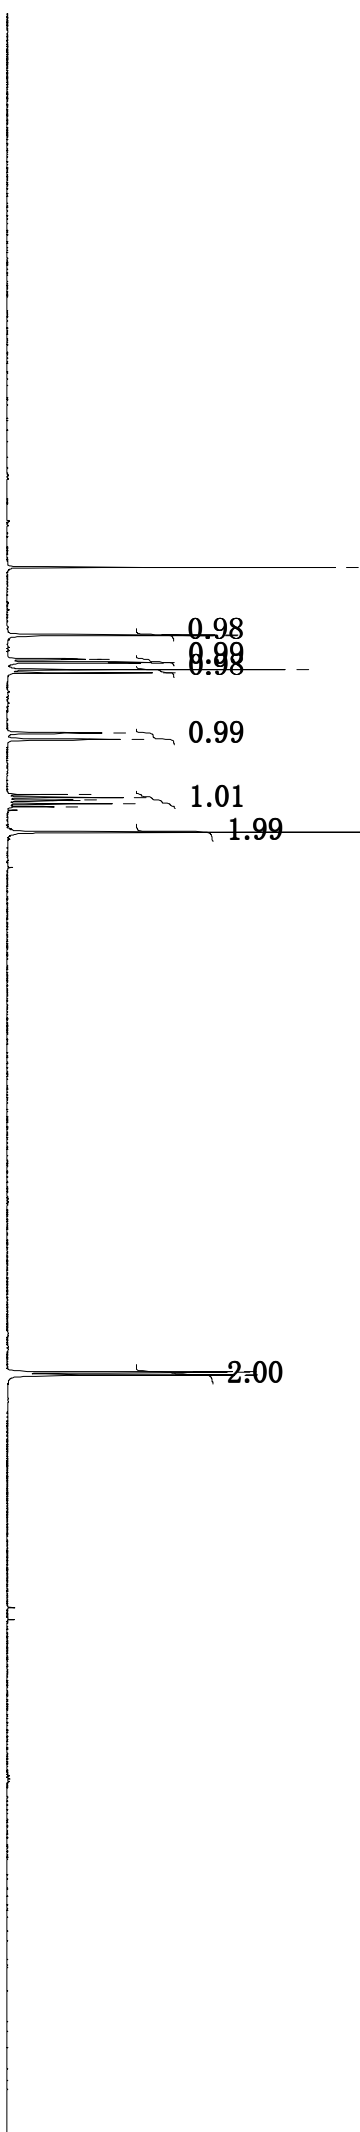

125 MHz, CDCl<sub>3</sub>

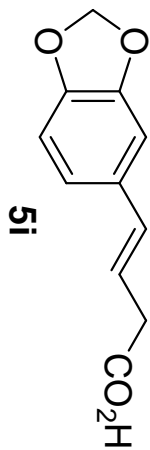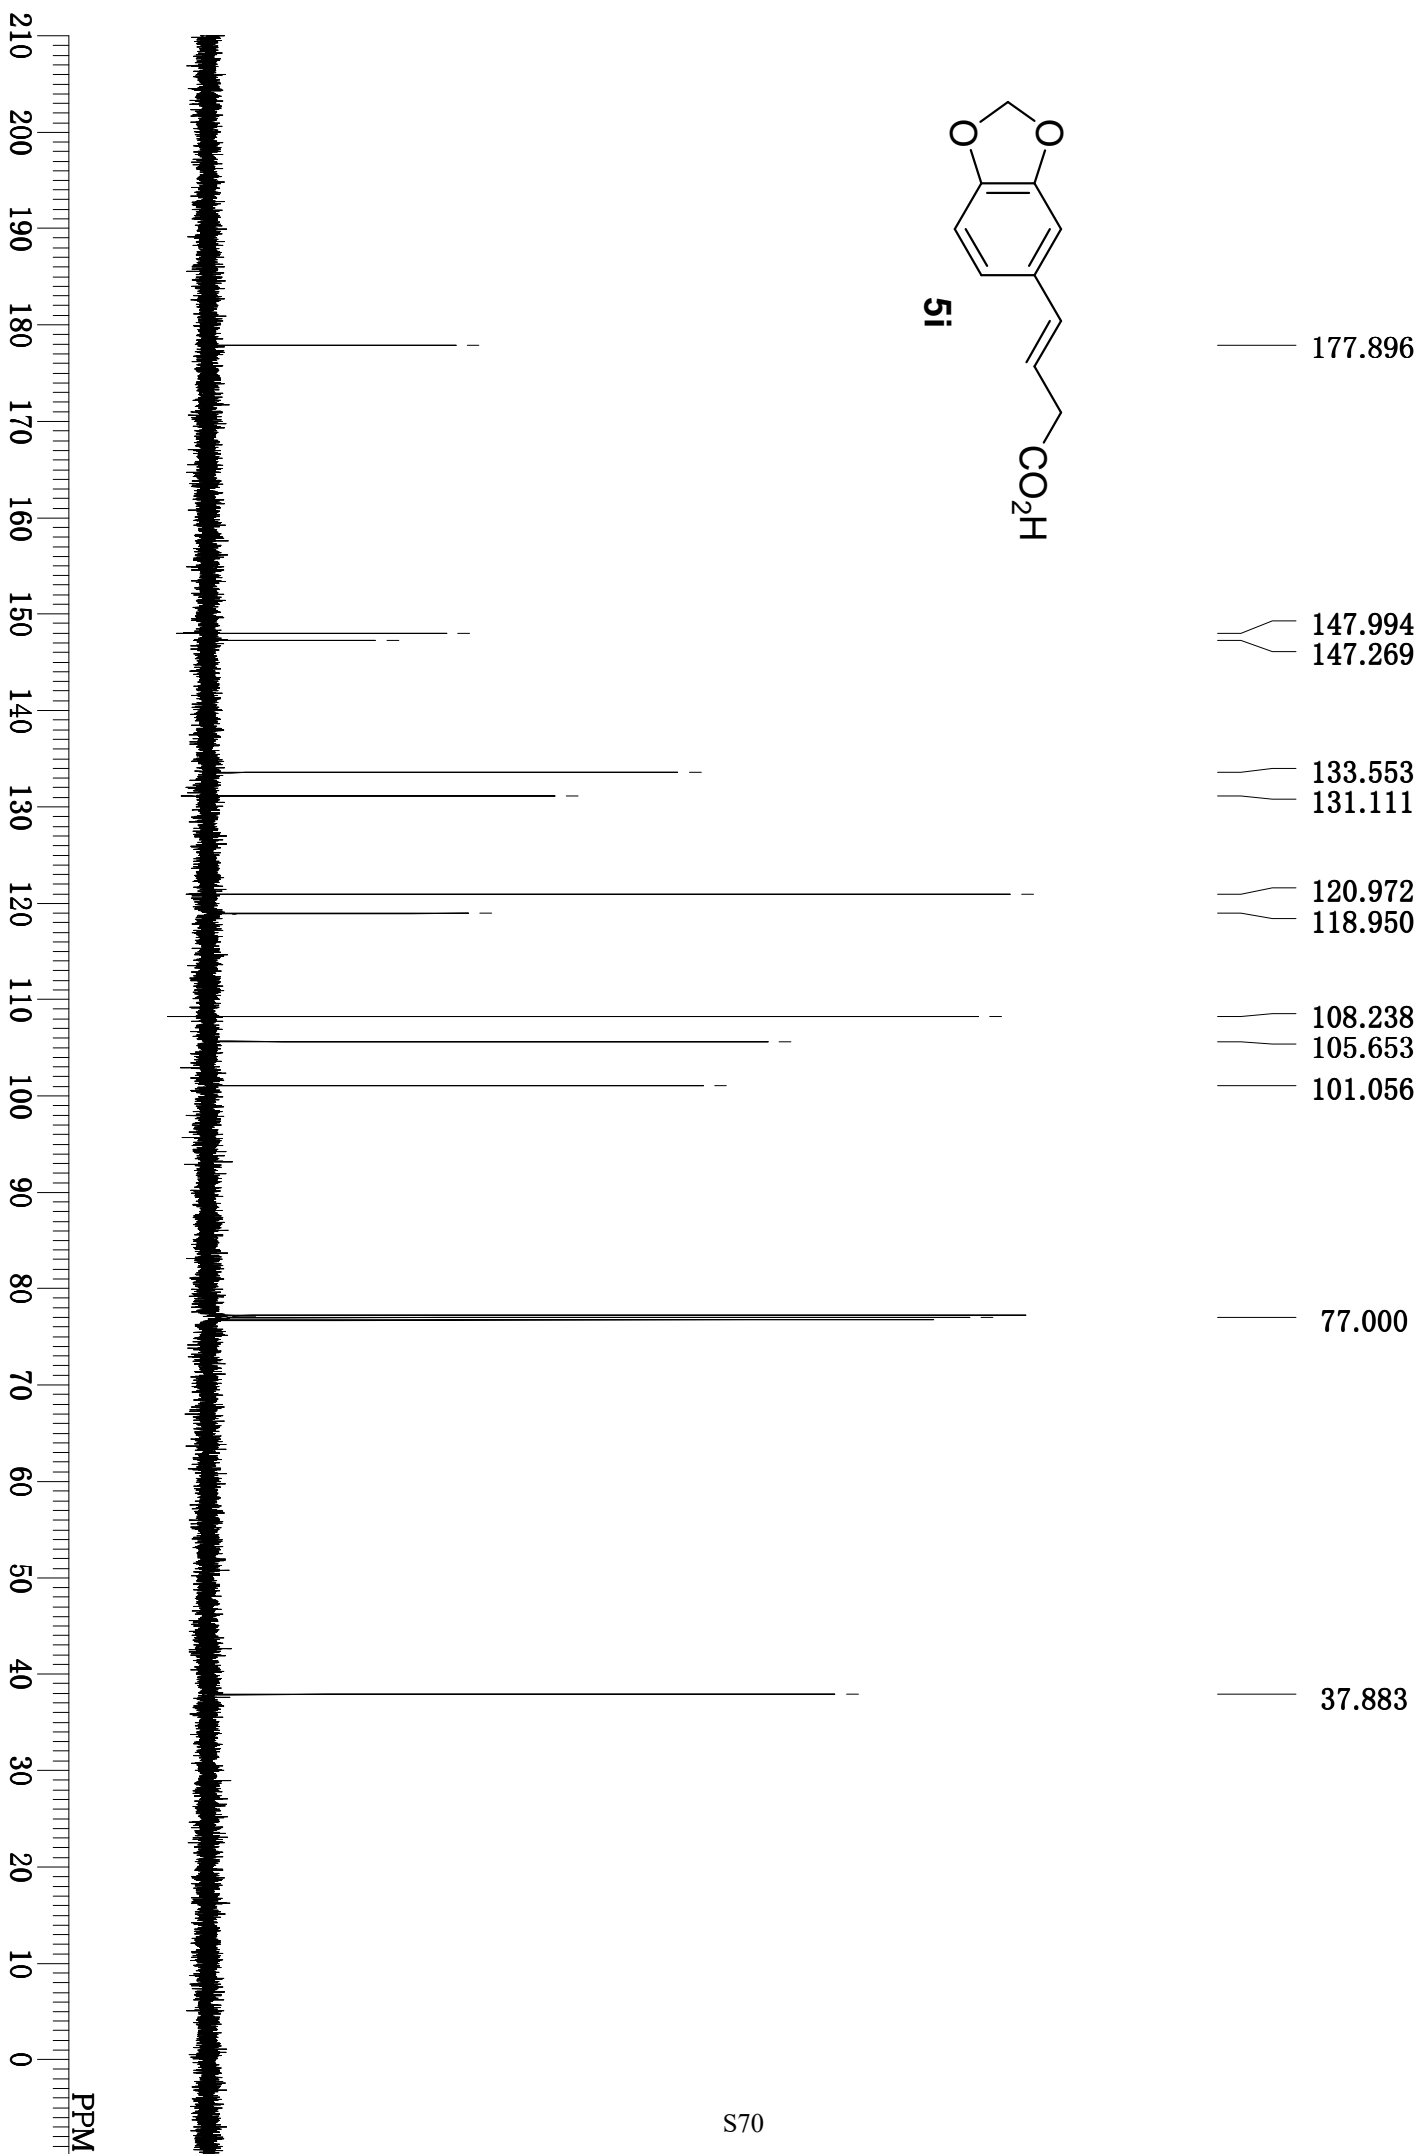

500 MHz, CDCl<sub>3</sub>

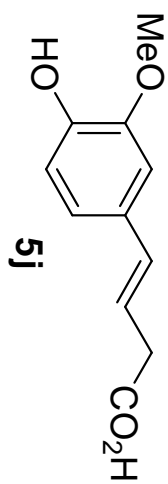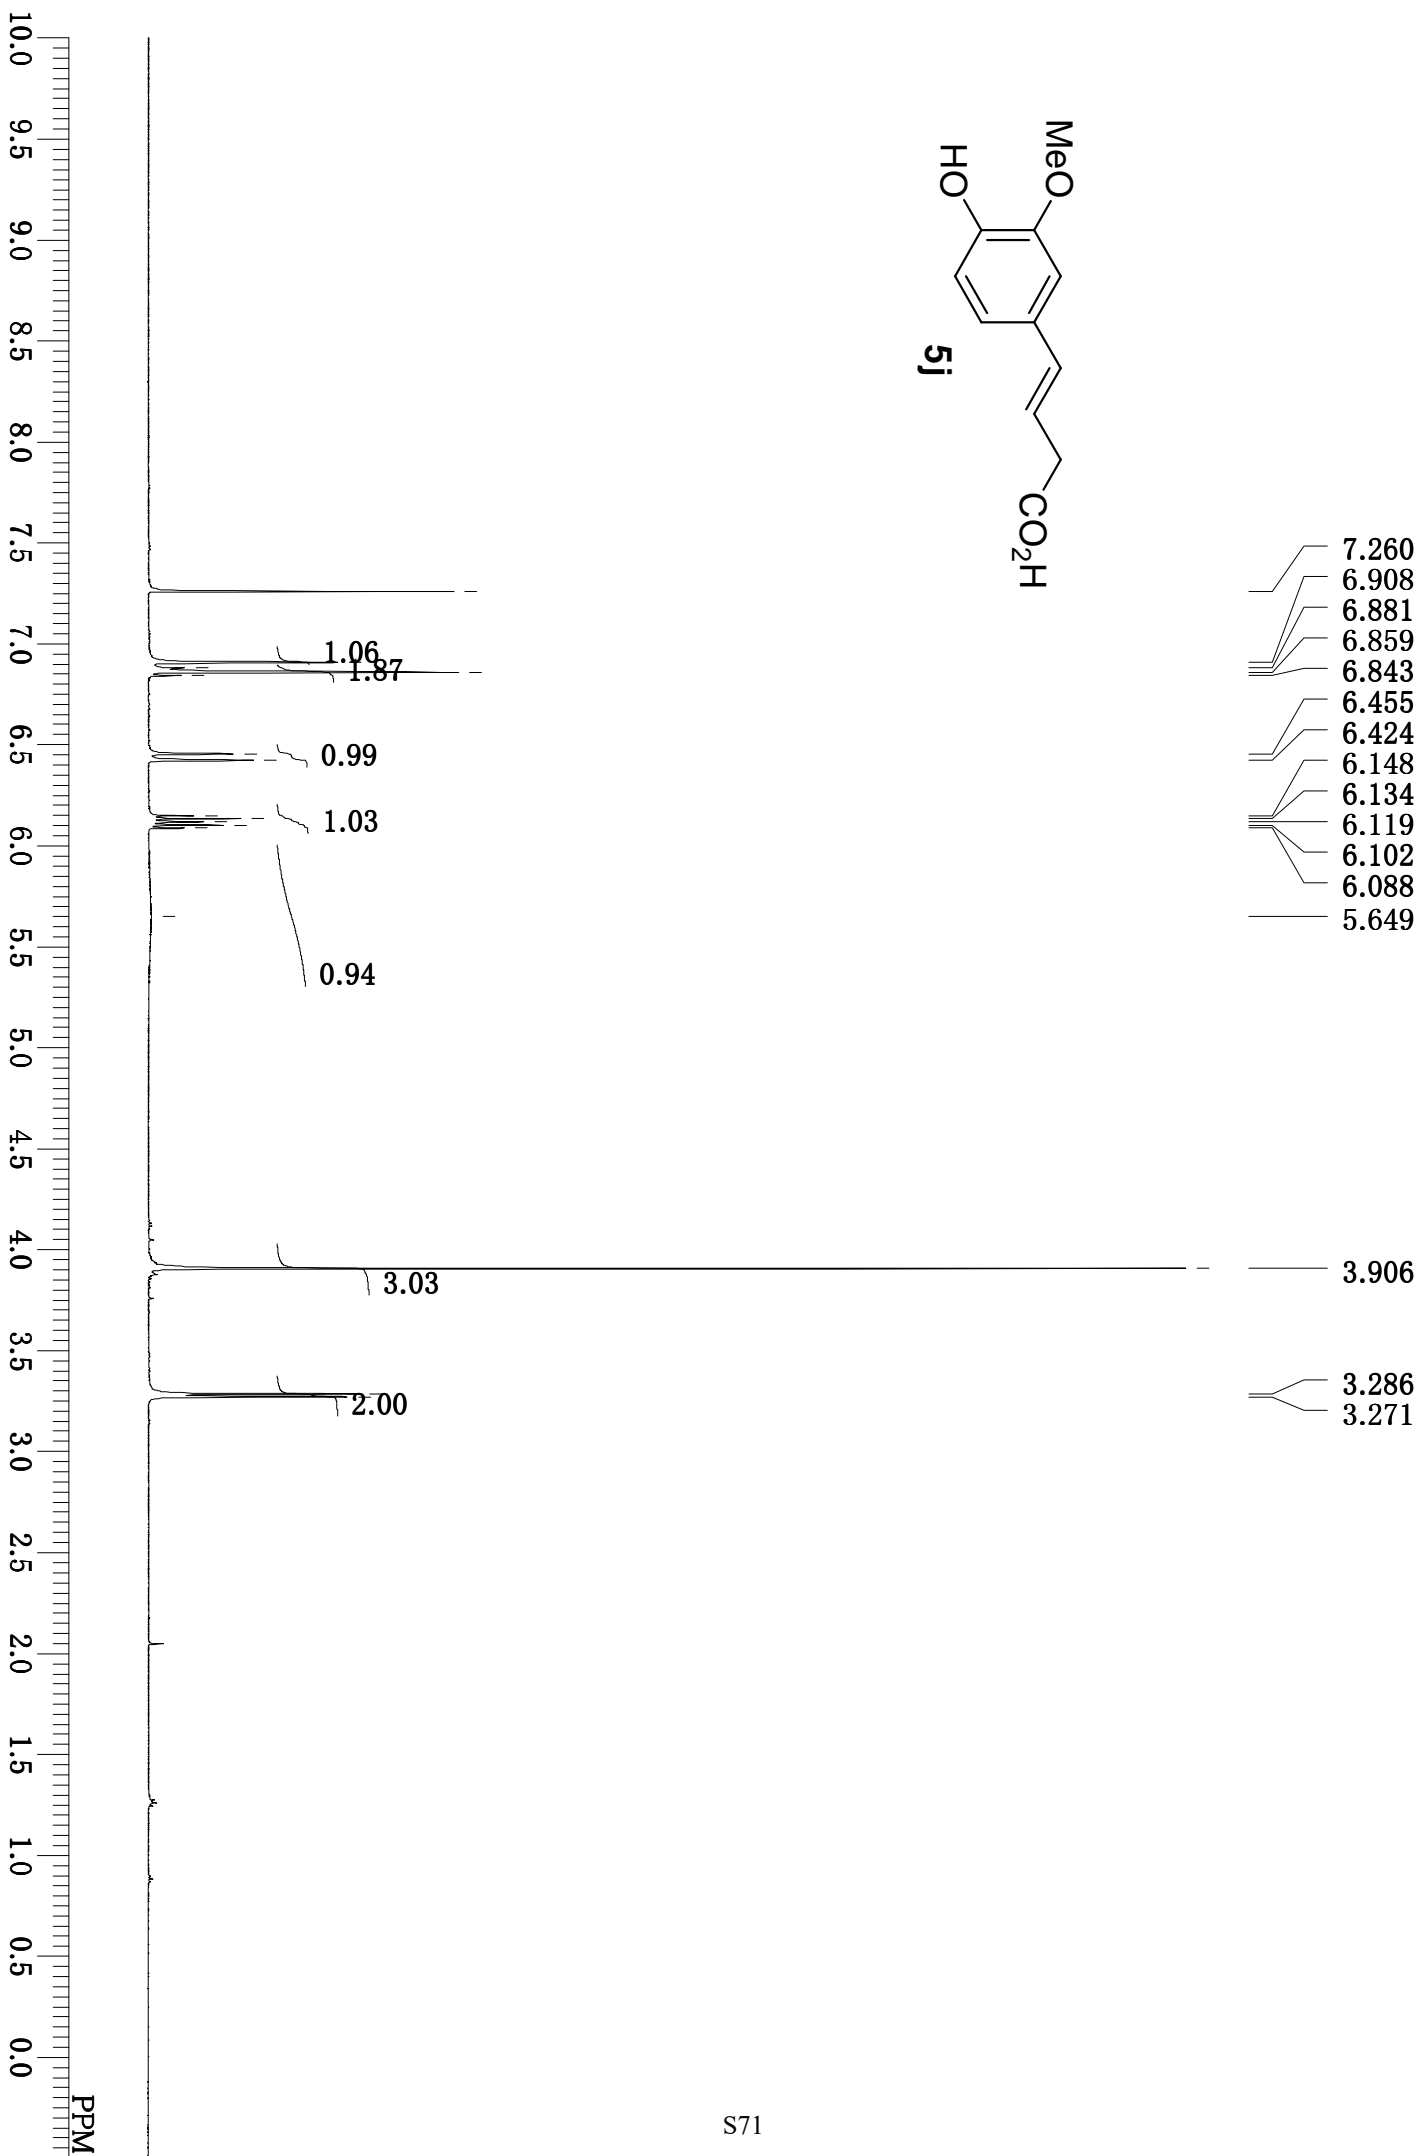

125 MHz, CDCl<sub>3</sub>

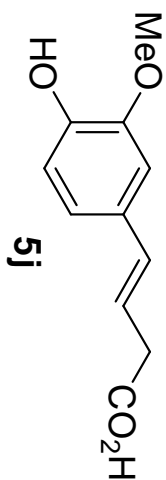

177.954

146.582  
145.485

133.782  
129.251

120.199  
118.368  
114.381

108.076

77.000

55.873

37.931





500 MHz, CDCl<sub>3</sub>

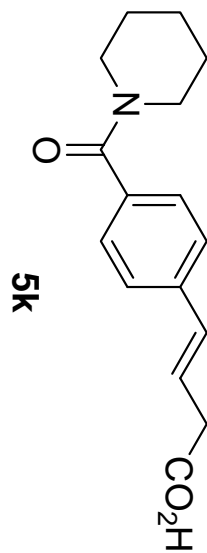

9.170

7.370  
7.354  
7.338  
7.321  
7.260  
6.473  
6.441  
6.328  
6.314  
6.300  
6.282  
6.268

3.703  
3.341  
3.246  
3.231

1.665  
1.509

1.03

1.96  
1.91

0.96  
0.96

2.06  
1.94  
2.00

4.07  
2.08



125 MHz, CDCl<sub>3</sub>

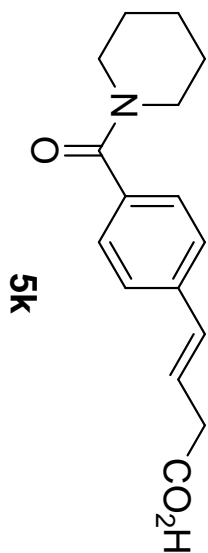

175.550

170.466

138.093

134.783

132.628

127.229

126.170

122.994

77.000

48.852

43.339

38.141

26.447

25.522

24.463



500 MHz, CDCl<sub>3</sub>

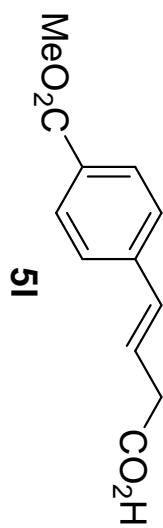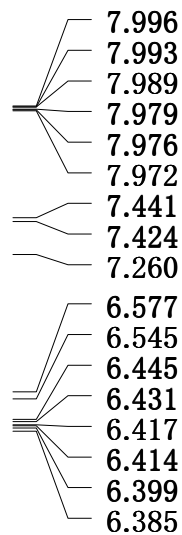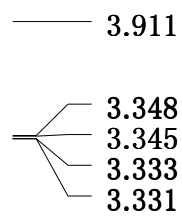

125 MHz, CDCl<sub>3</sub>

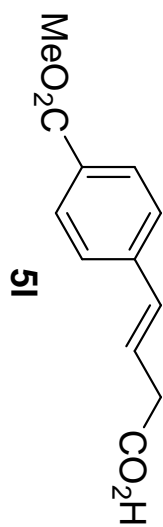

177.095

166.870

141.021

133.114

129.928

129.127

126.199

123.614

77.000

52.095

37.931



500 MHz, CDCl<sub>3</sub>

7.793  
7.787  
7.782  
7.778  
7.775  
7.770  
7.602  
7.588  
7.573  
7.498  
7.487  
7.482  
7.470  
7.260  
6.608  
6.577  
6.476  
6.462  
6.448  
6.443  
6.430  
6.416

3.366  
3.363  
3.351  
3.349

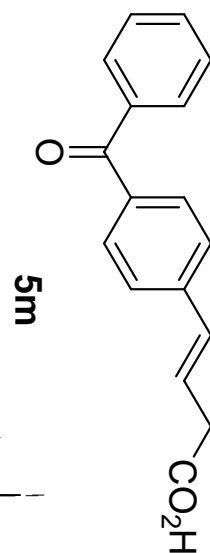

10.0  
9.5  
9.0  
8.5  
8.0  
7.5  
7.0  
6.5  
6.0  
5.5  
5.0  
4.5  
4.0  
3.5  
3.0  
2.5  
2.0  
1.5  
1.0  
0.5  
0.0

PPM

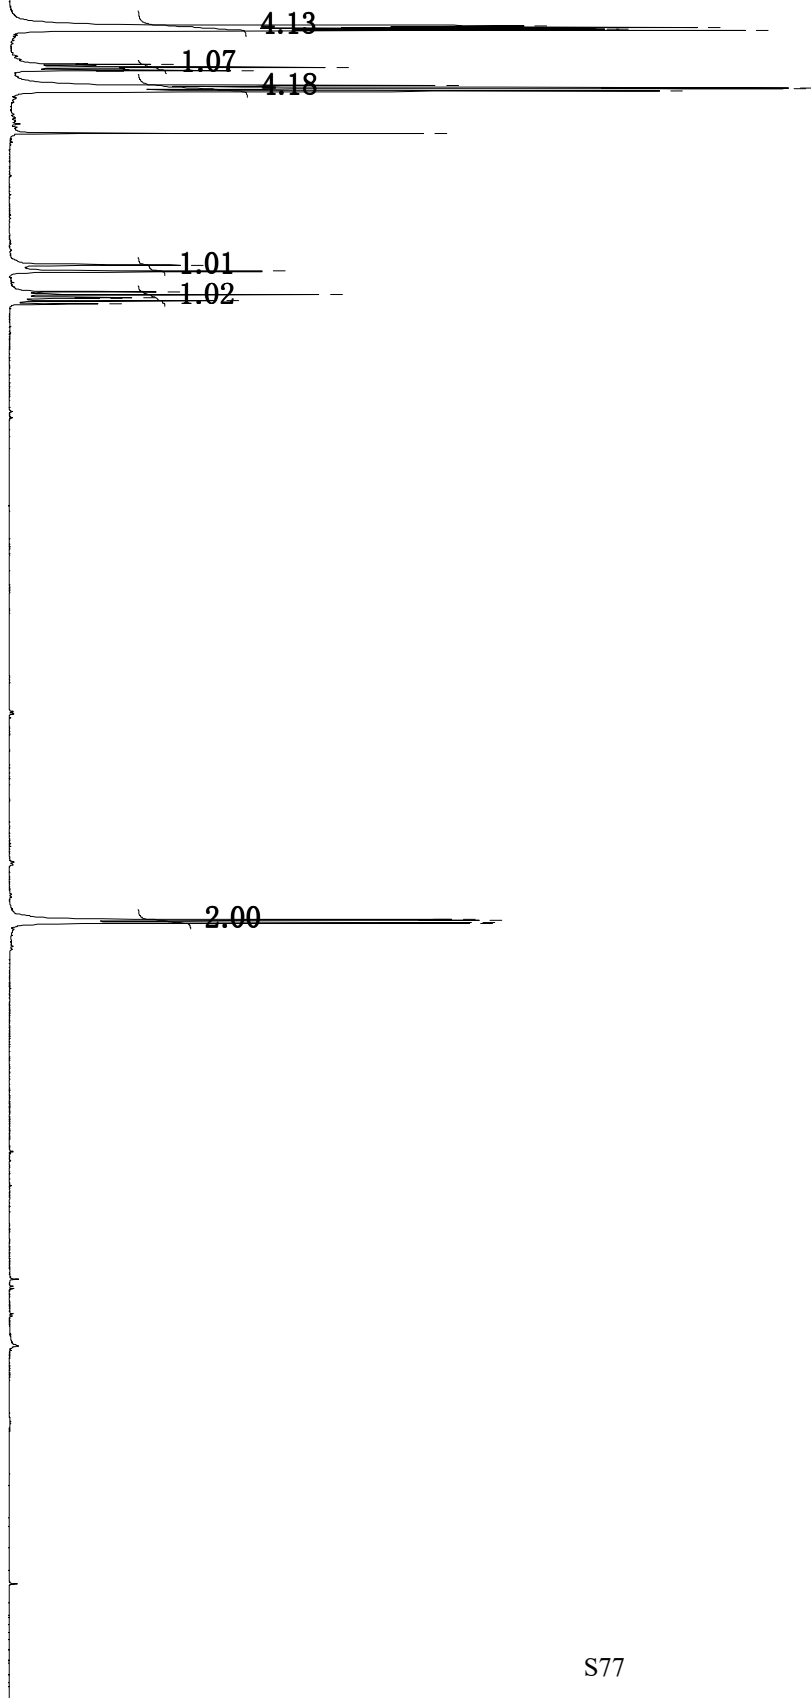

125 MHz, CDCl<sub>3</sub>

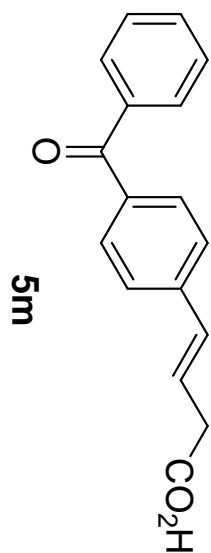

196.220

177.124

140.668

137.664

136.491

133.076

132.351

130.605

129.938

128.259

126.113

123.766

77.000

37.969



500 MHz, CDCl<sub>3</sub>

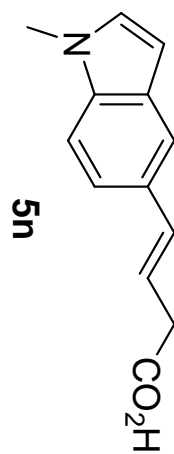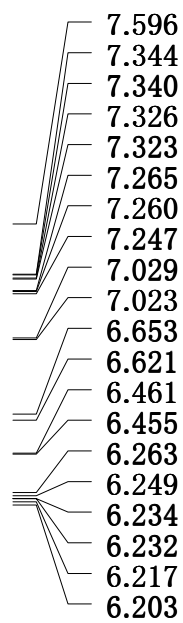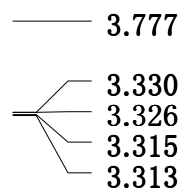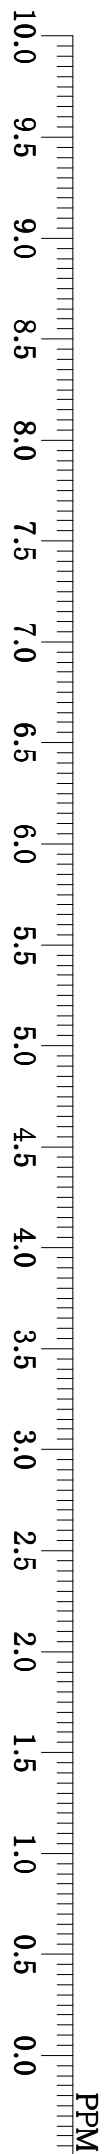

0.99  
1.02  
1.32  
0.96  
1.00  
0.96  
1.00

3.00

2.00

125 MHz, CDCl<sub>3</sub>

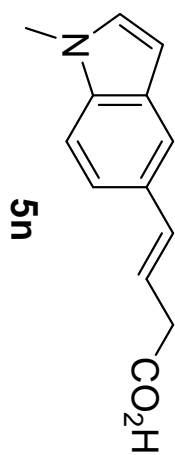

178.068

136.462

135.098

128.583

128.297

119.942

119.360

117.614

109.287

101.246

77.000

38.160

32.876





500 MHz, CDCl<sub>3</sub>

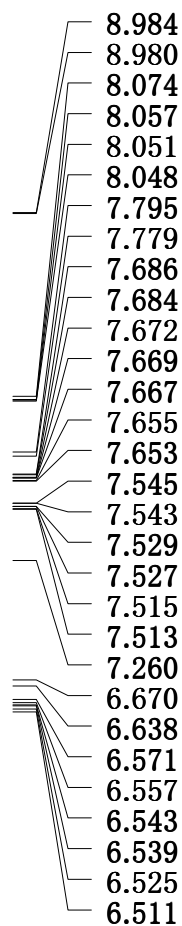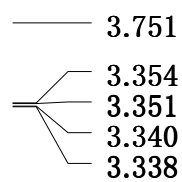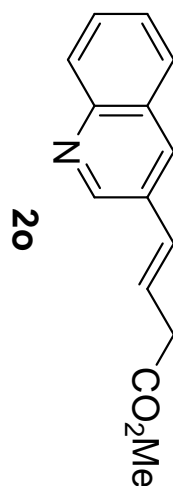

1.00

2.02

1.06  
1.03  
1.05

1.03  
1.03

3.00

2.07

125 MHz, CDCl<sub>3</sub>

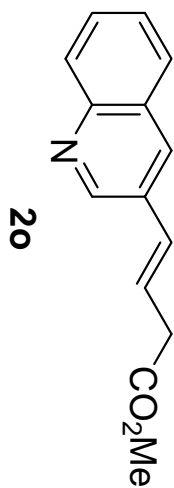

171.630

149.224  
147.498

132.294  
130.329  
129.671  
129.232  
129.213  
127.944  
127.801  
126.943  
124.262

77.000

52.067

38.303



500 MHz, CDCl<sub>3</sub>

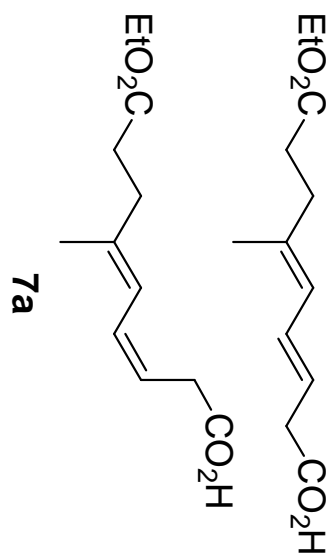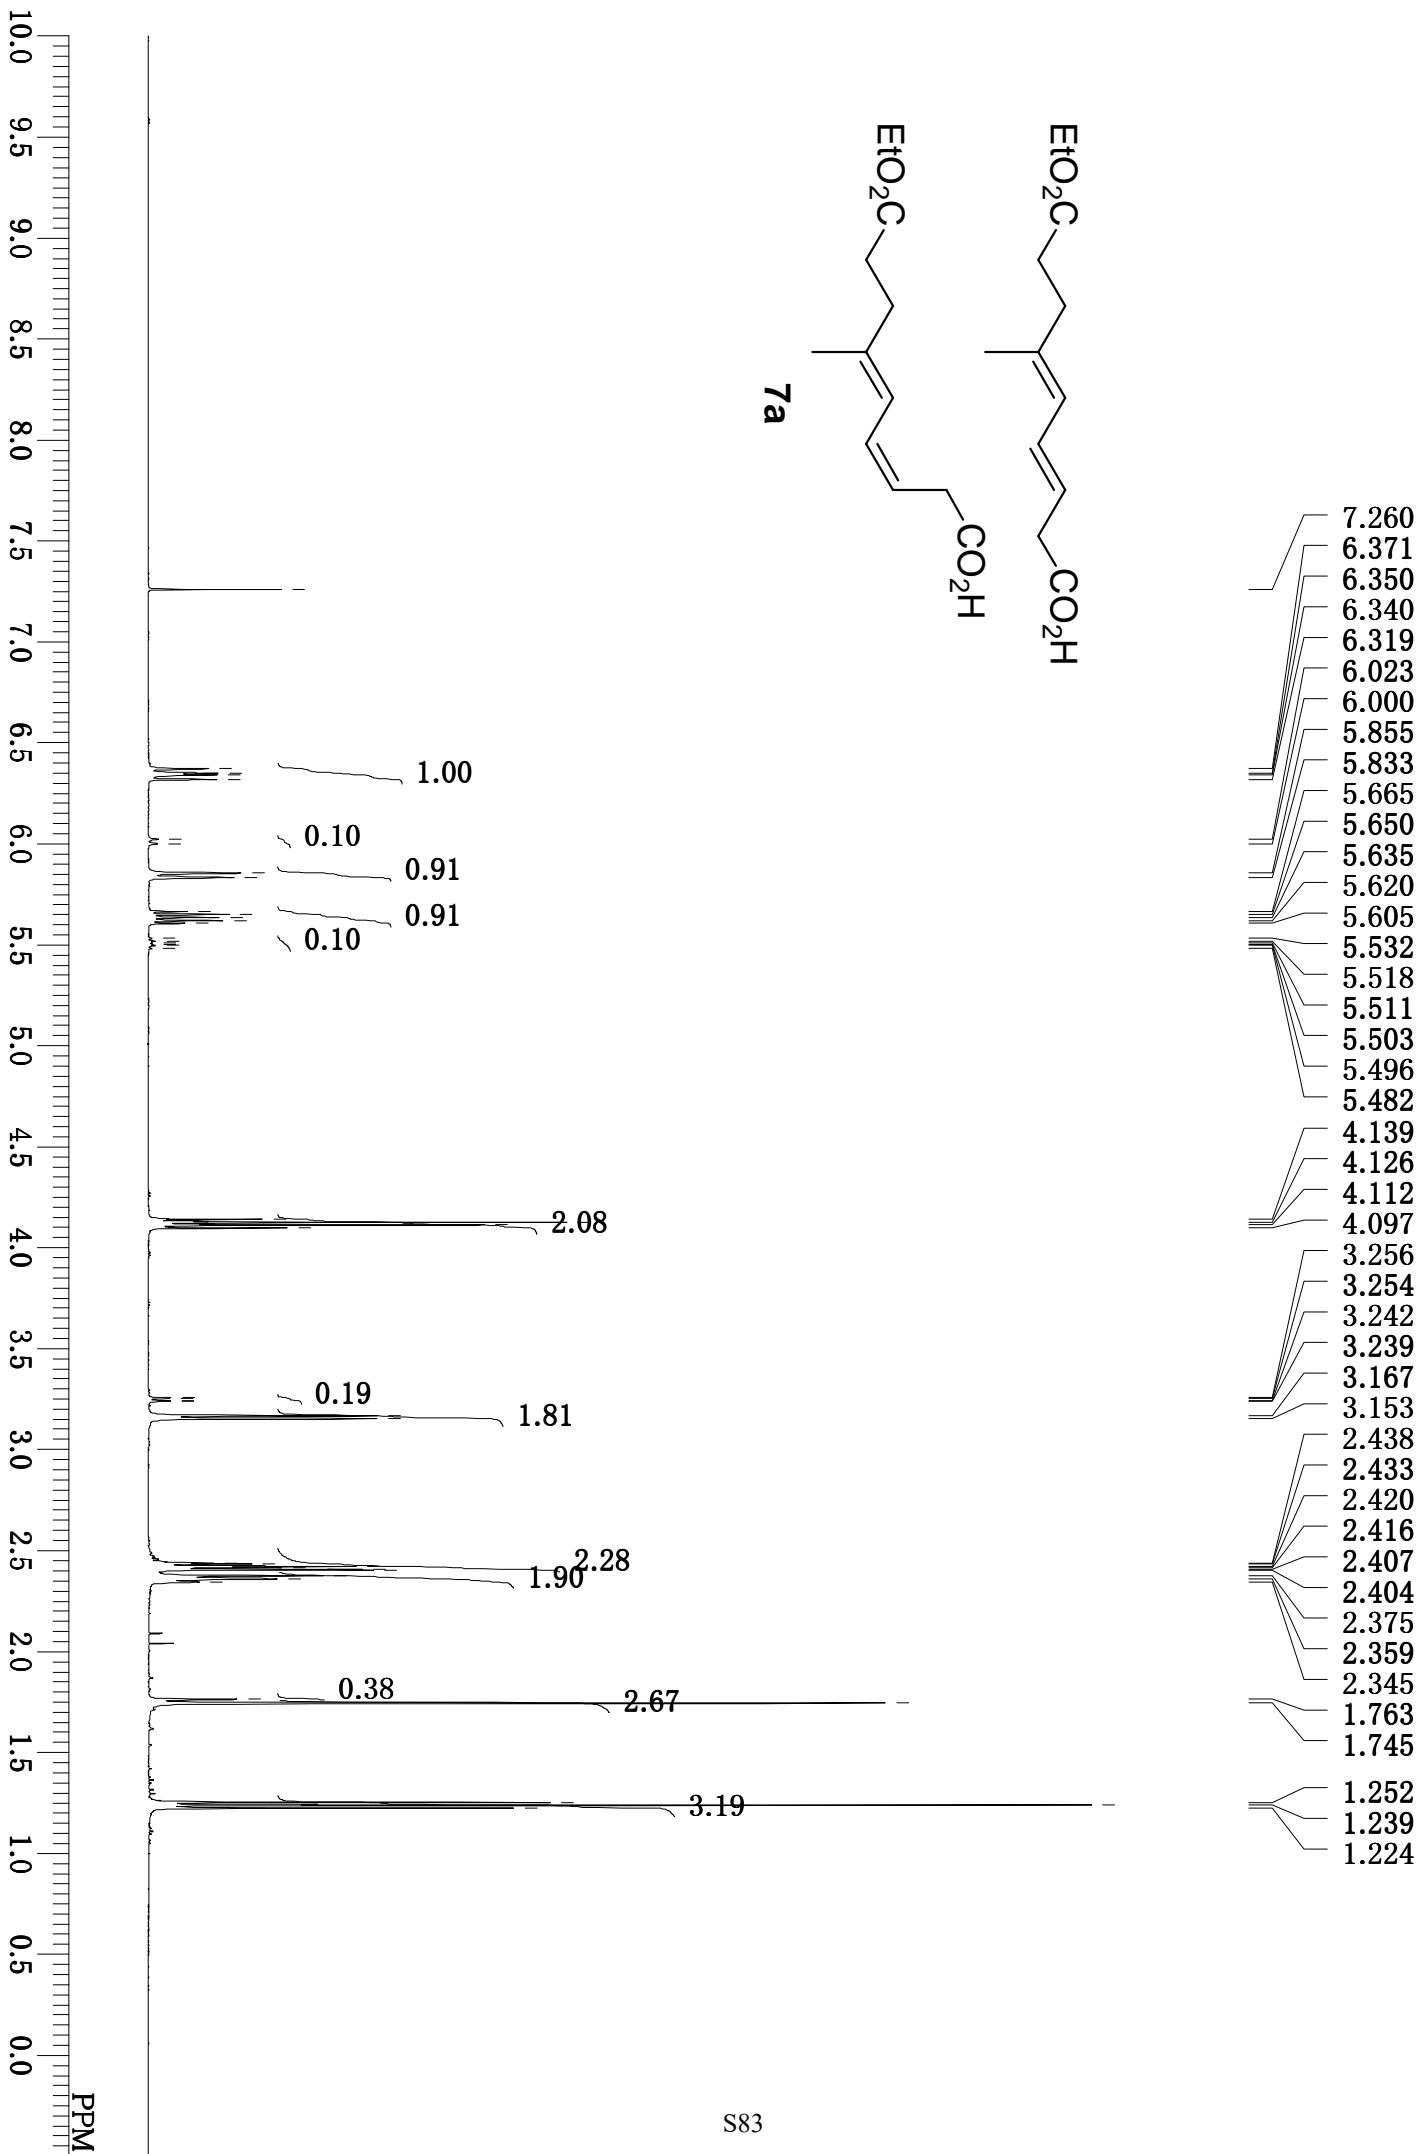

125 MHz, CDCl<sub>3</sub>

177.915  
177.782  
173.213  
173.146

139.314  
137.053  
130.472  
127.620  
124.444  
122.326  
119.665  
119.608

77.000

60.441  
60.394

37.893  
35.098  
34.669  
32.866  
32.809

16.517  
16.479  
14.200

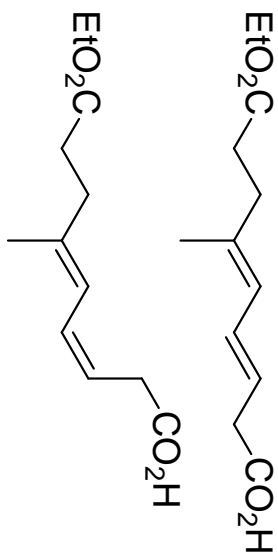

7a

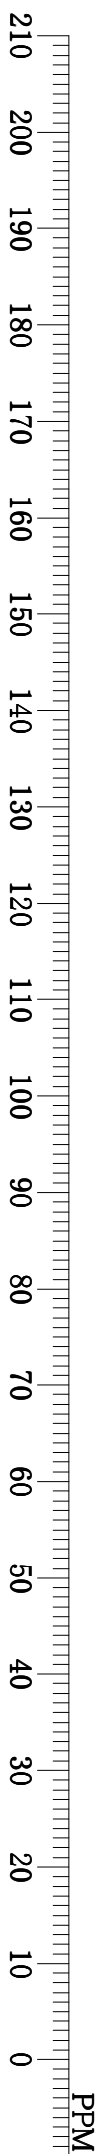

500 MHz, CDCl<sub>3</sub>

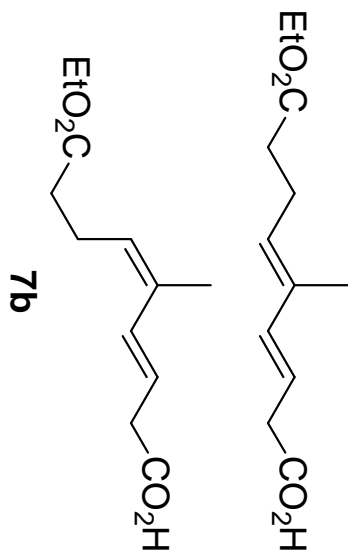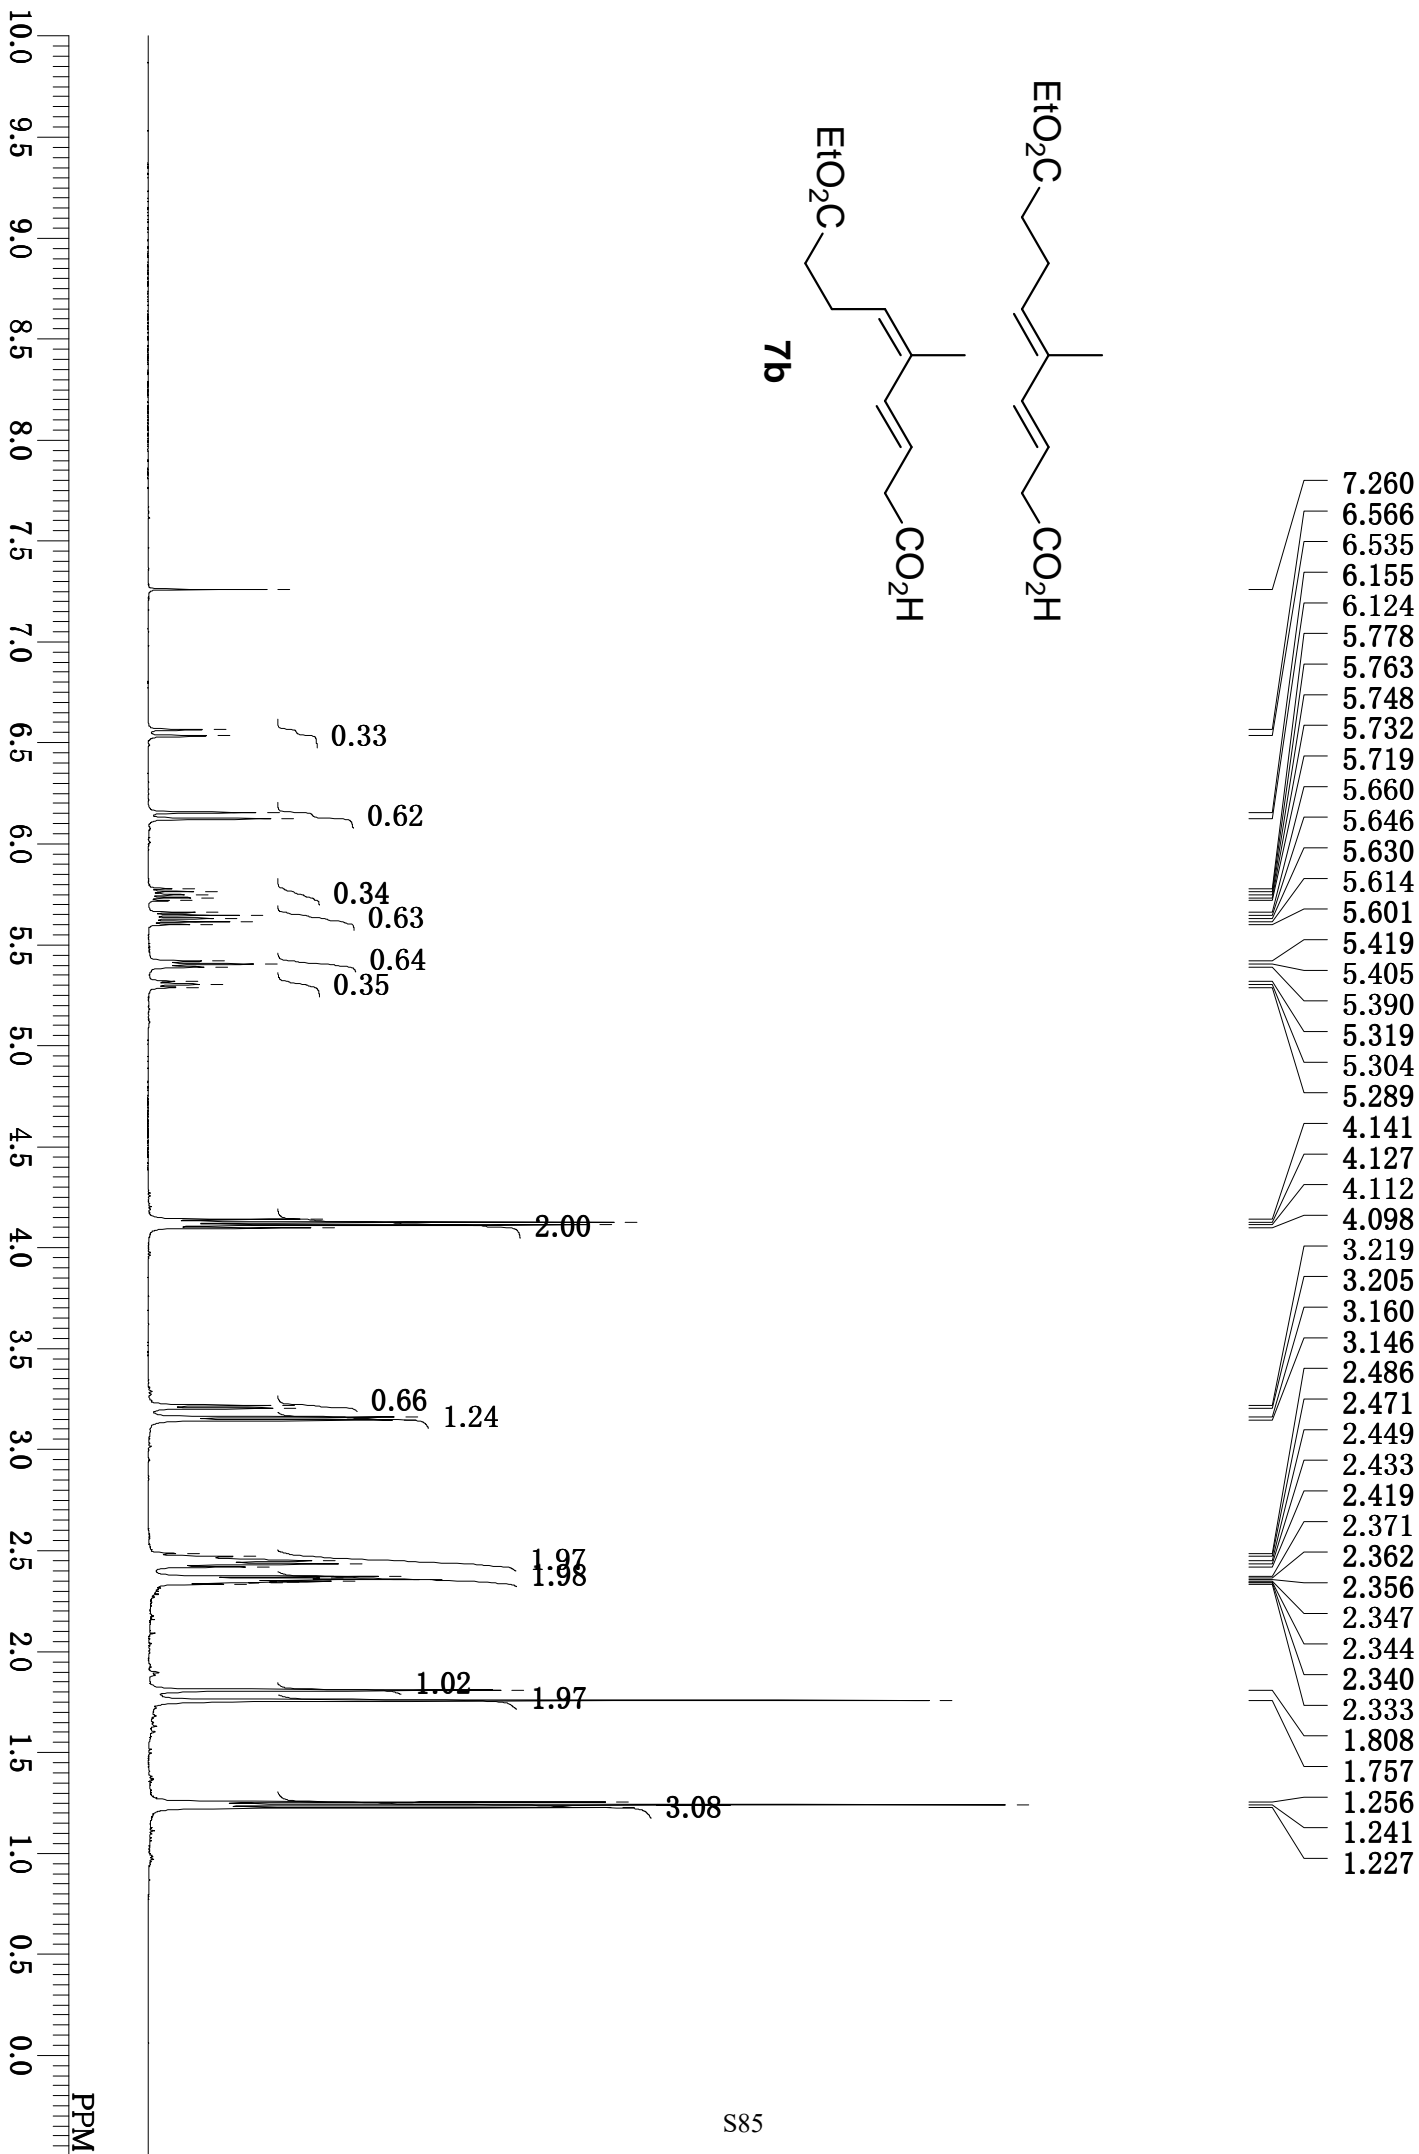

125 MHz, CDCl<sub>3</sub>

178.068  
177.858  
173.146  
173.127

138.541  
134.173  
132.523  
130.787  
130.281  
128.288  
121.096  
118.129

77.000

60.394

38.217  
37.845  
34.354  
34.039

23.662  
22.889  
20.361  
14.181  
12.282

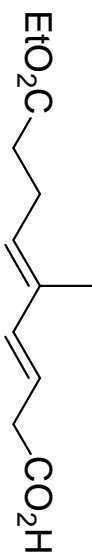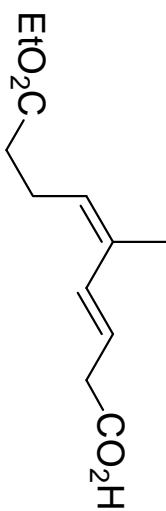

7b



500 MHz, CDCl<sub>3</sub>

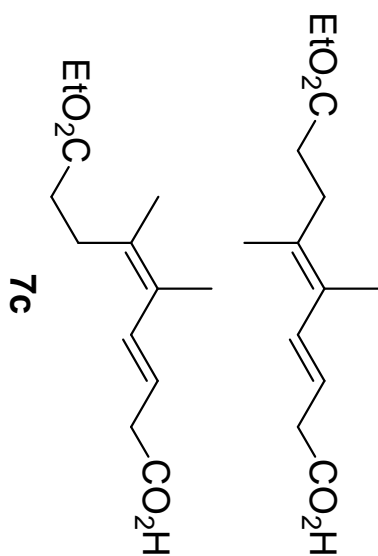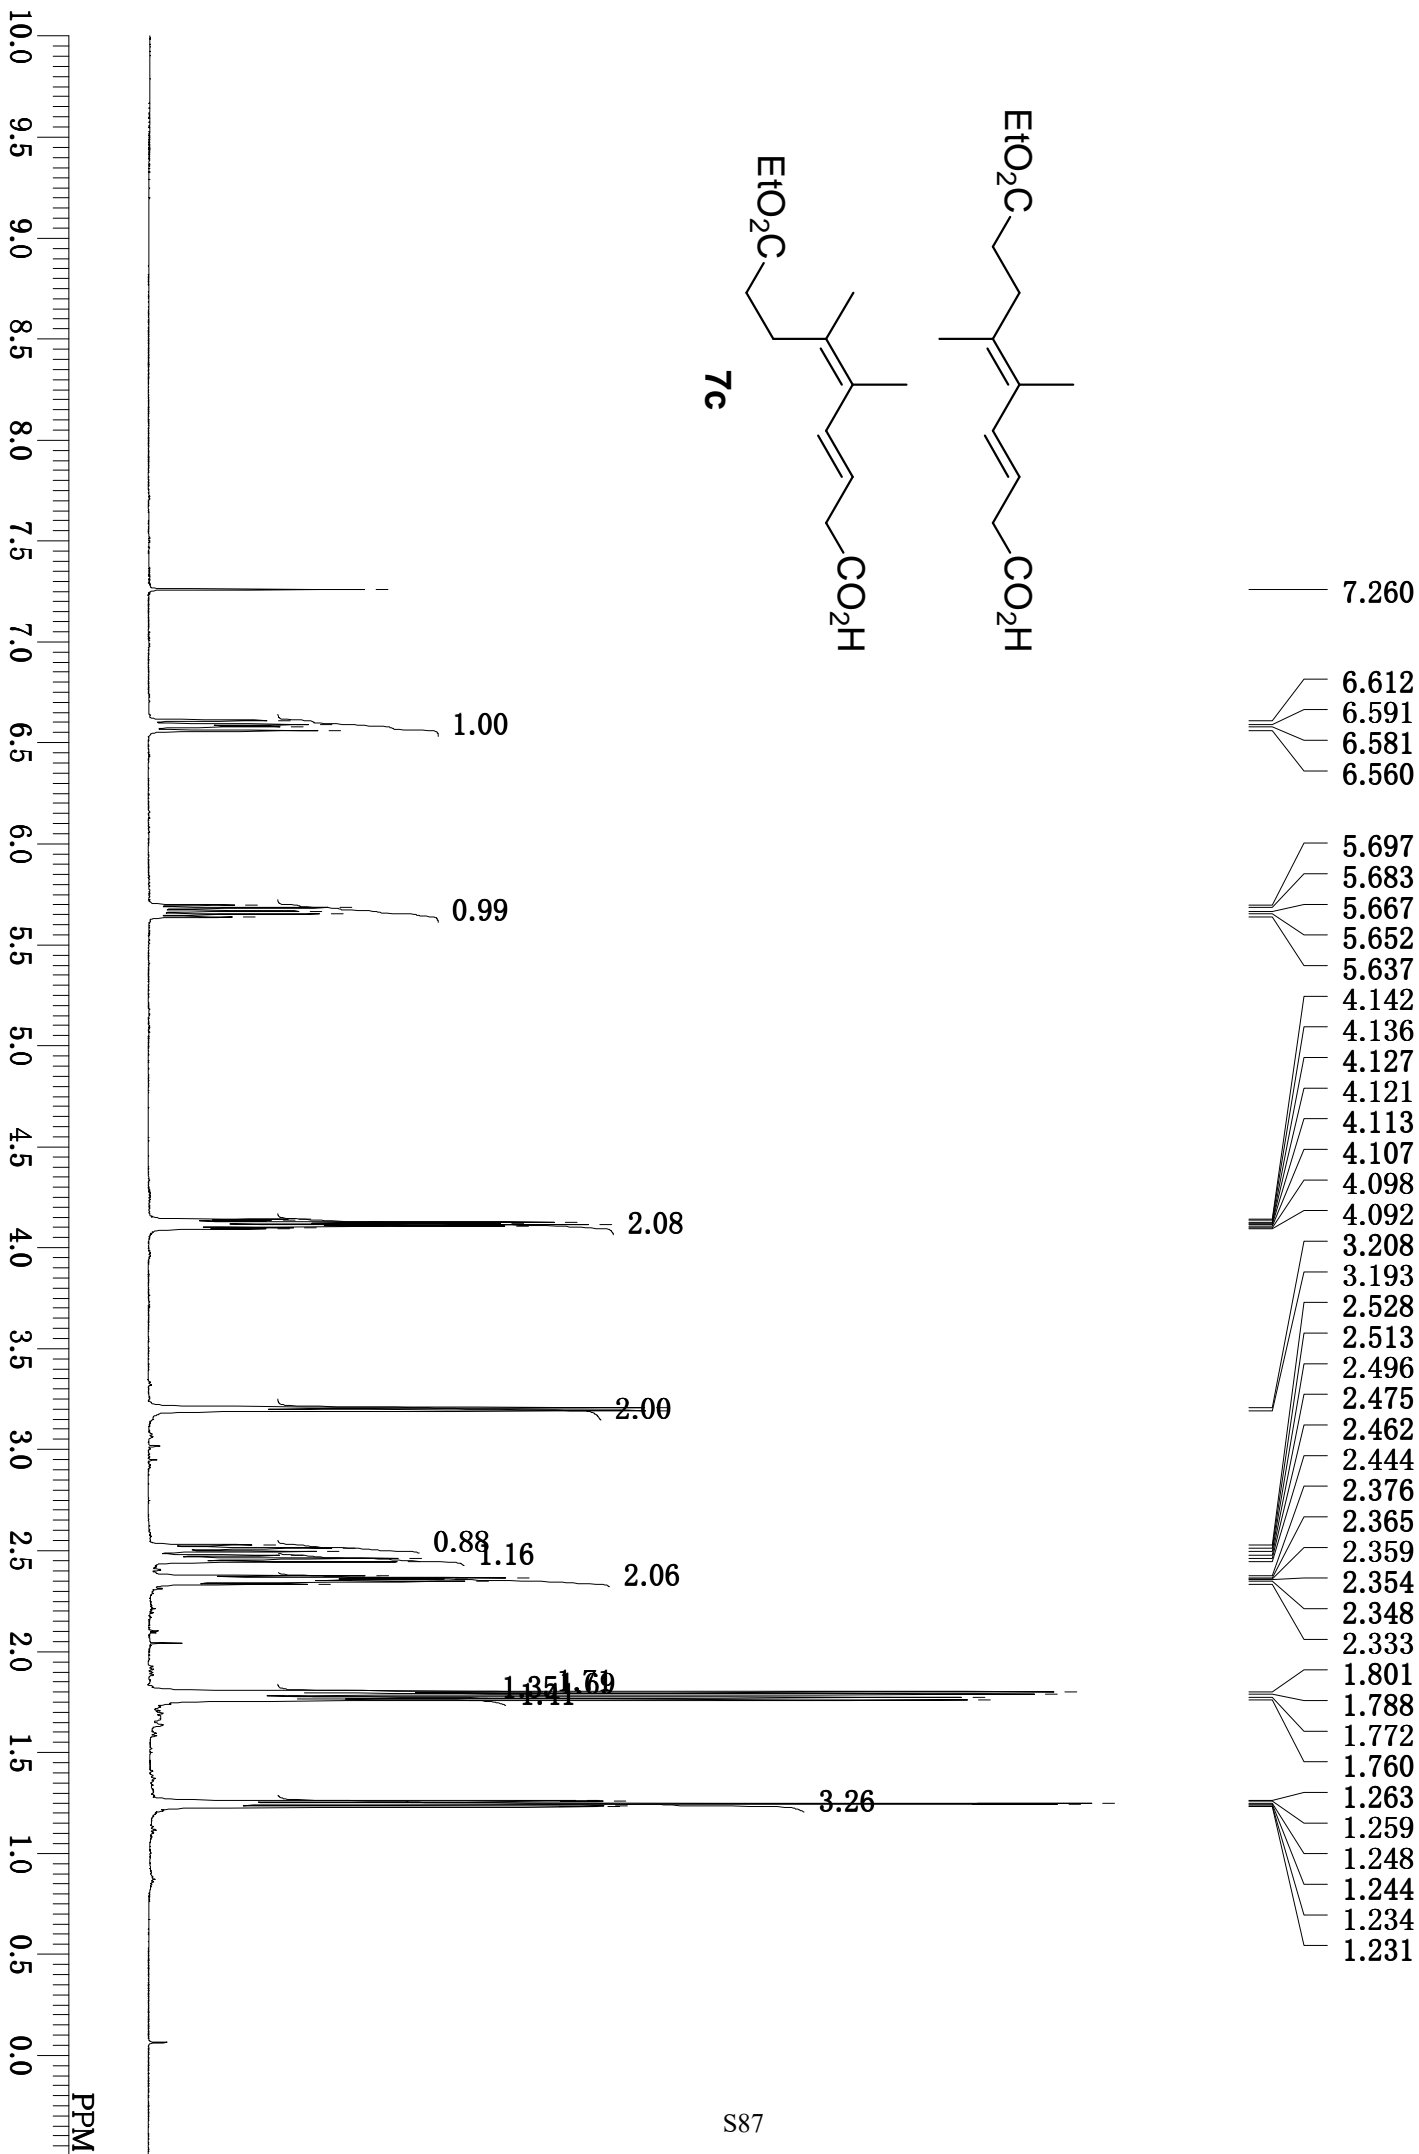

125 MHz, CDCl<sub>3</sub>

178.135

173.337

133.305

132.856

132.504

127.257

127.029

119.064

118.921

77.000

60.432

38.379

38.351

33.353

32.761

30.844

29.356

19.446

18.025

14.524

14.162

13.990

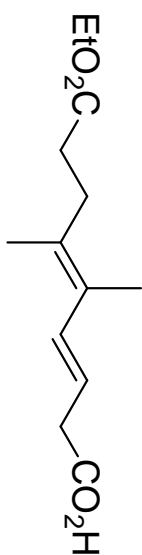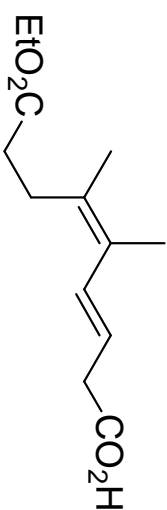

7c

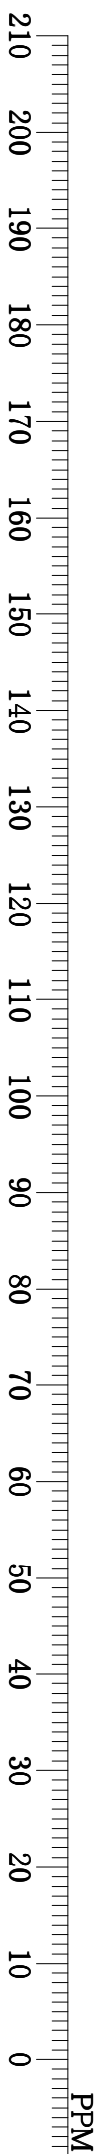



500 MHz, CDCl<sub>3</sub>

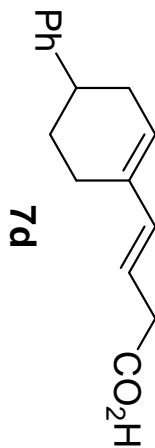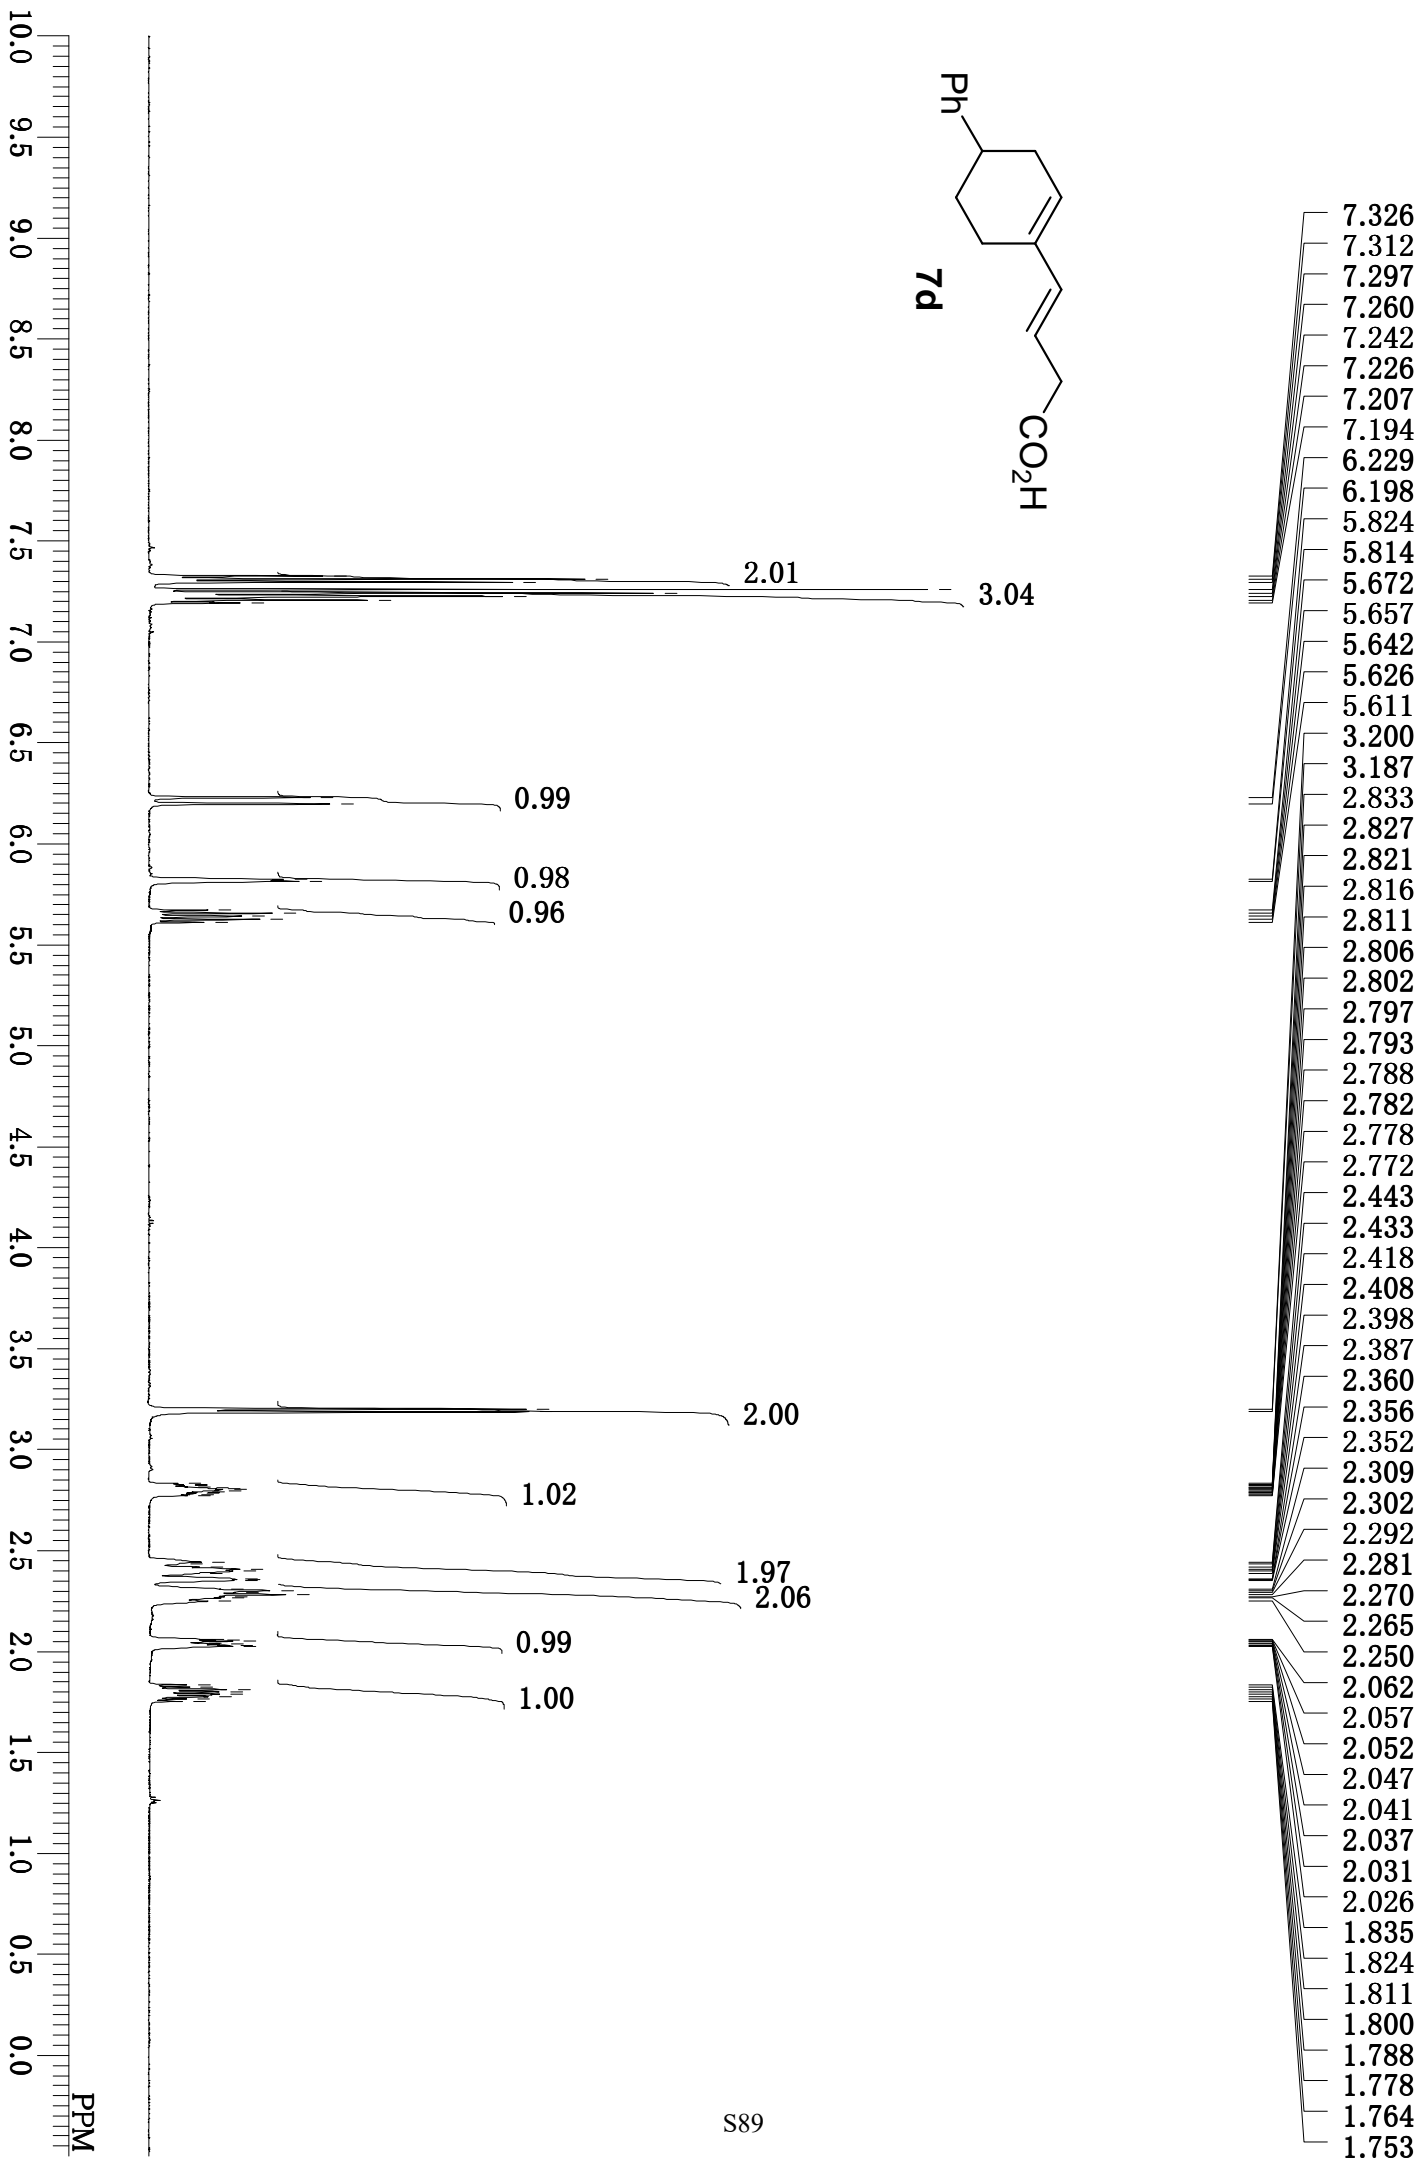

125 MHz, CDCl<sub>3</sub>

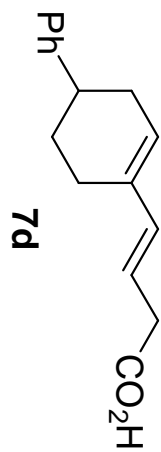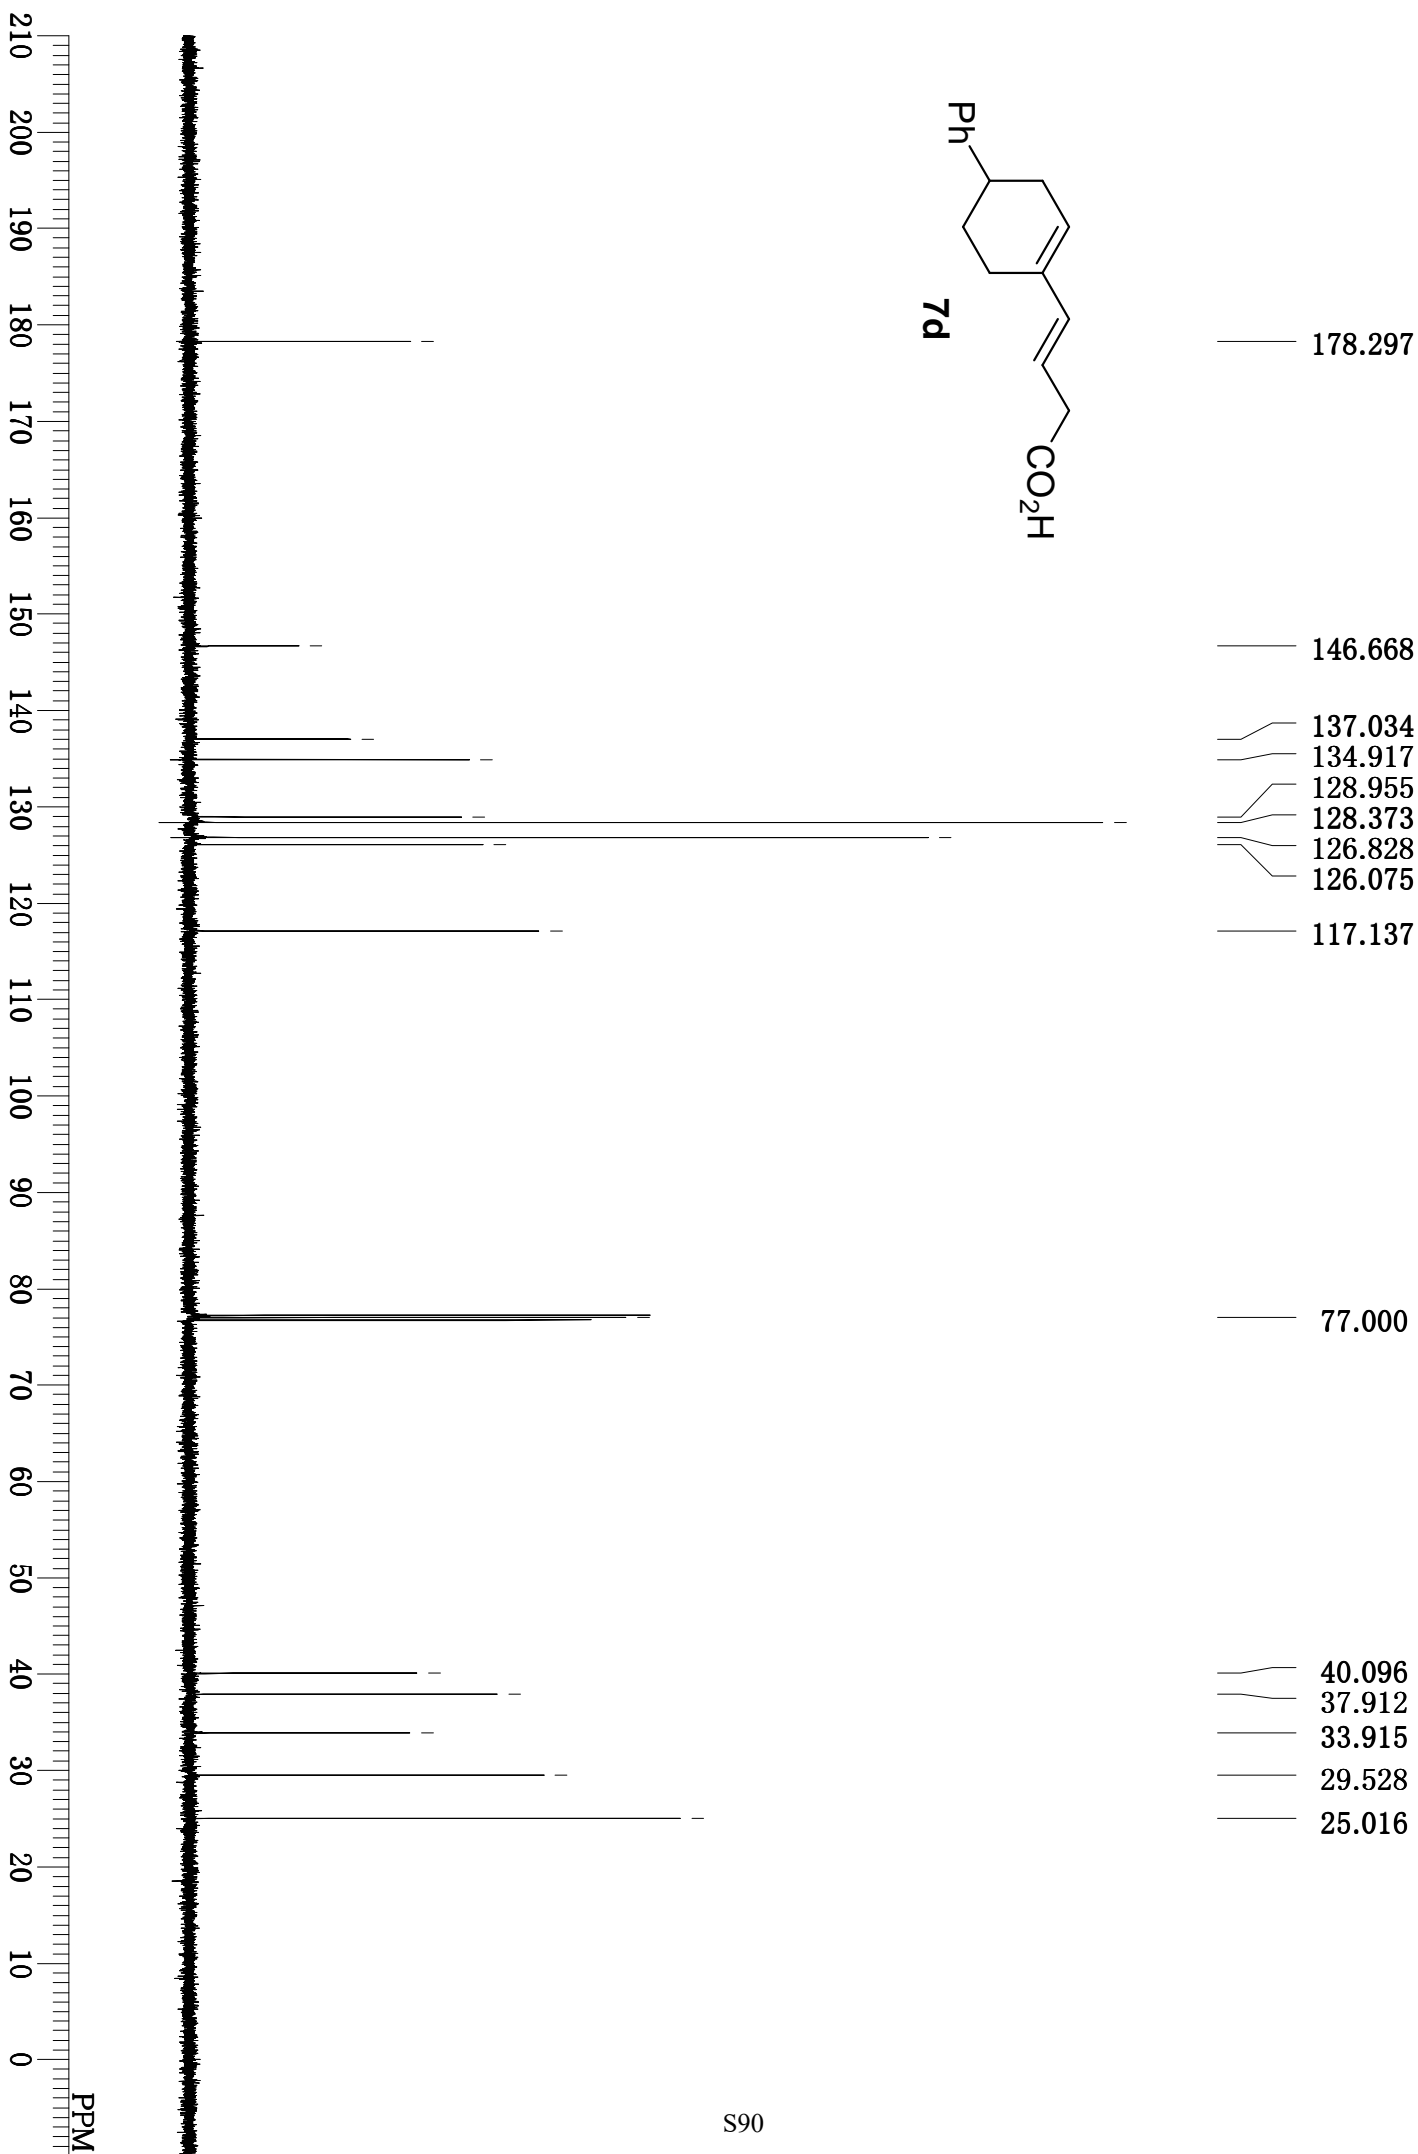

500 MHz, CDCl<sub>3</sub>

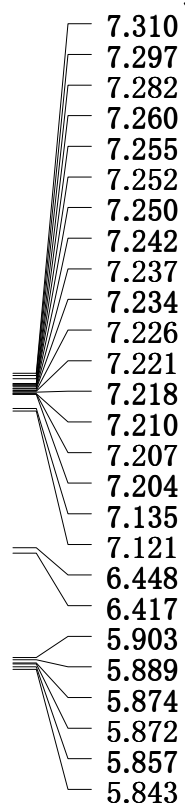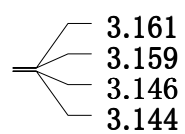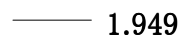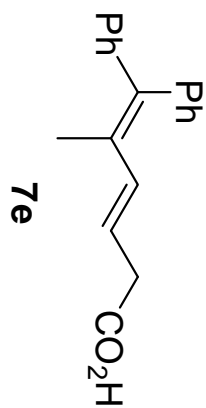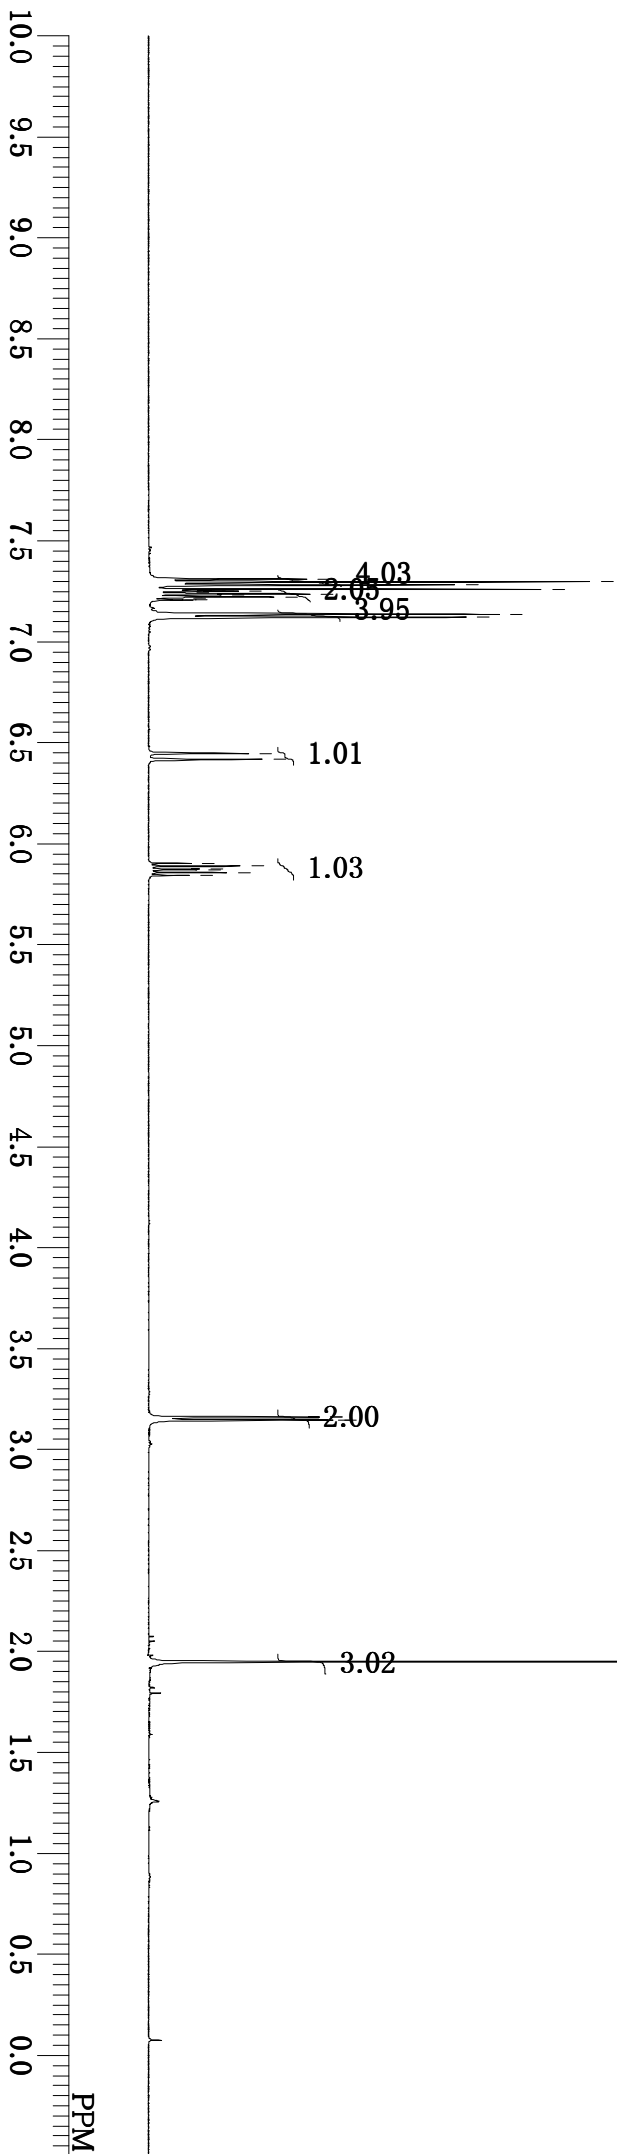

125 MHz, CDCl<sub>3</sub>

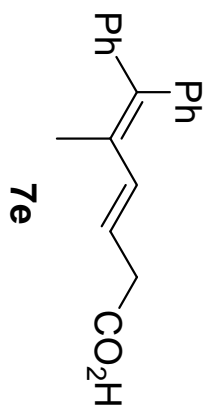

177.343

142.900  
142.118  
135.203  
130.634  
130.472  
129.900  
127.916  
127.897  
126.761  
126.657  
120.981

77.000

38.074

16.794



500 MHz, CDCl<sub>3</sub>

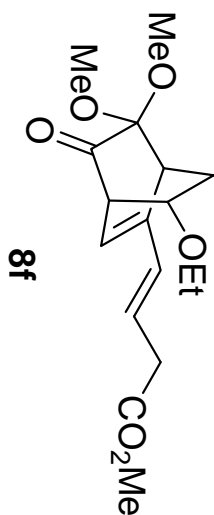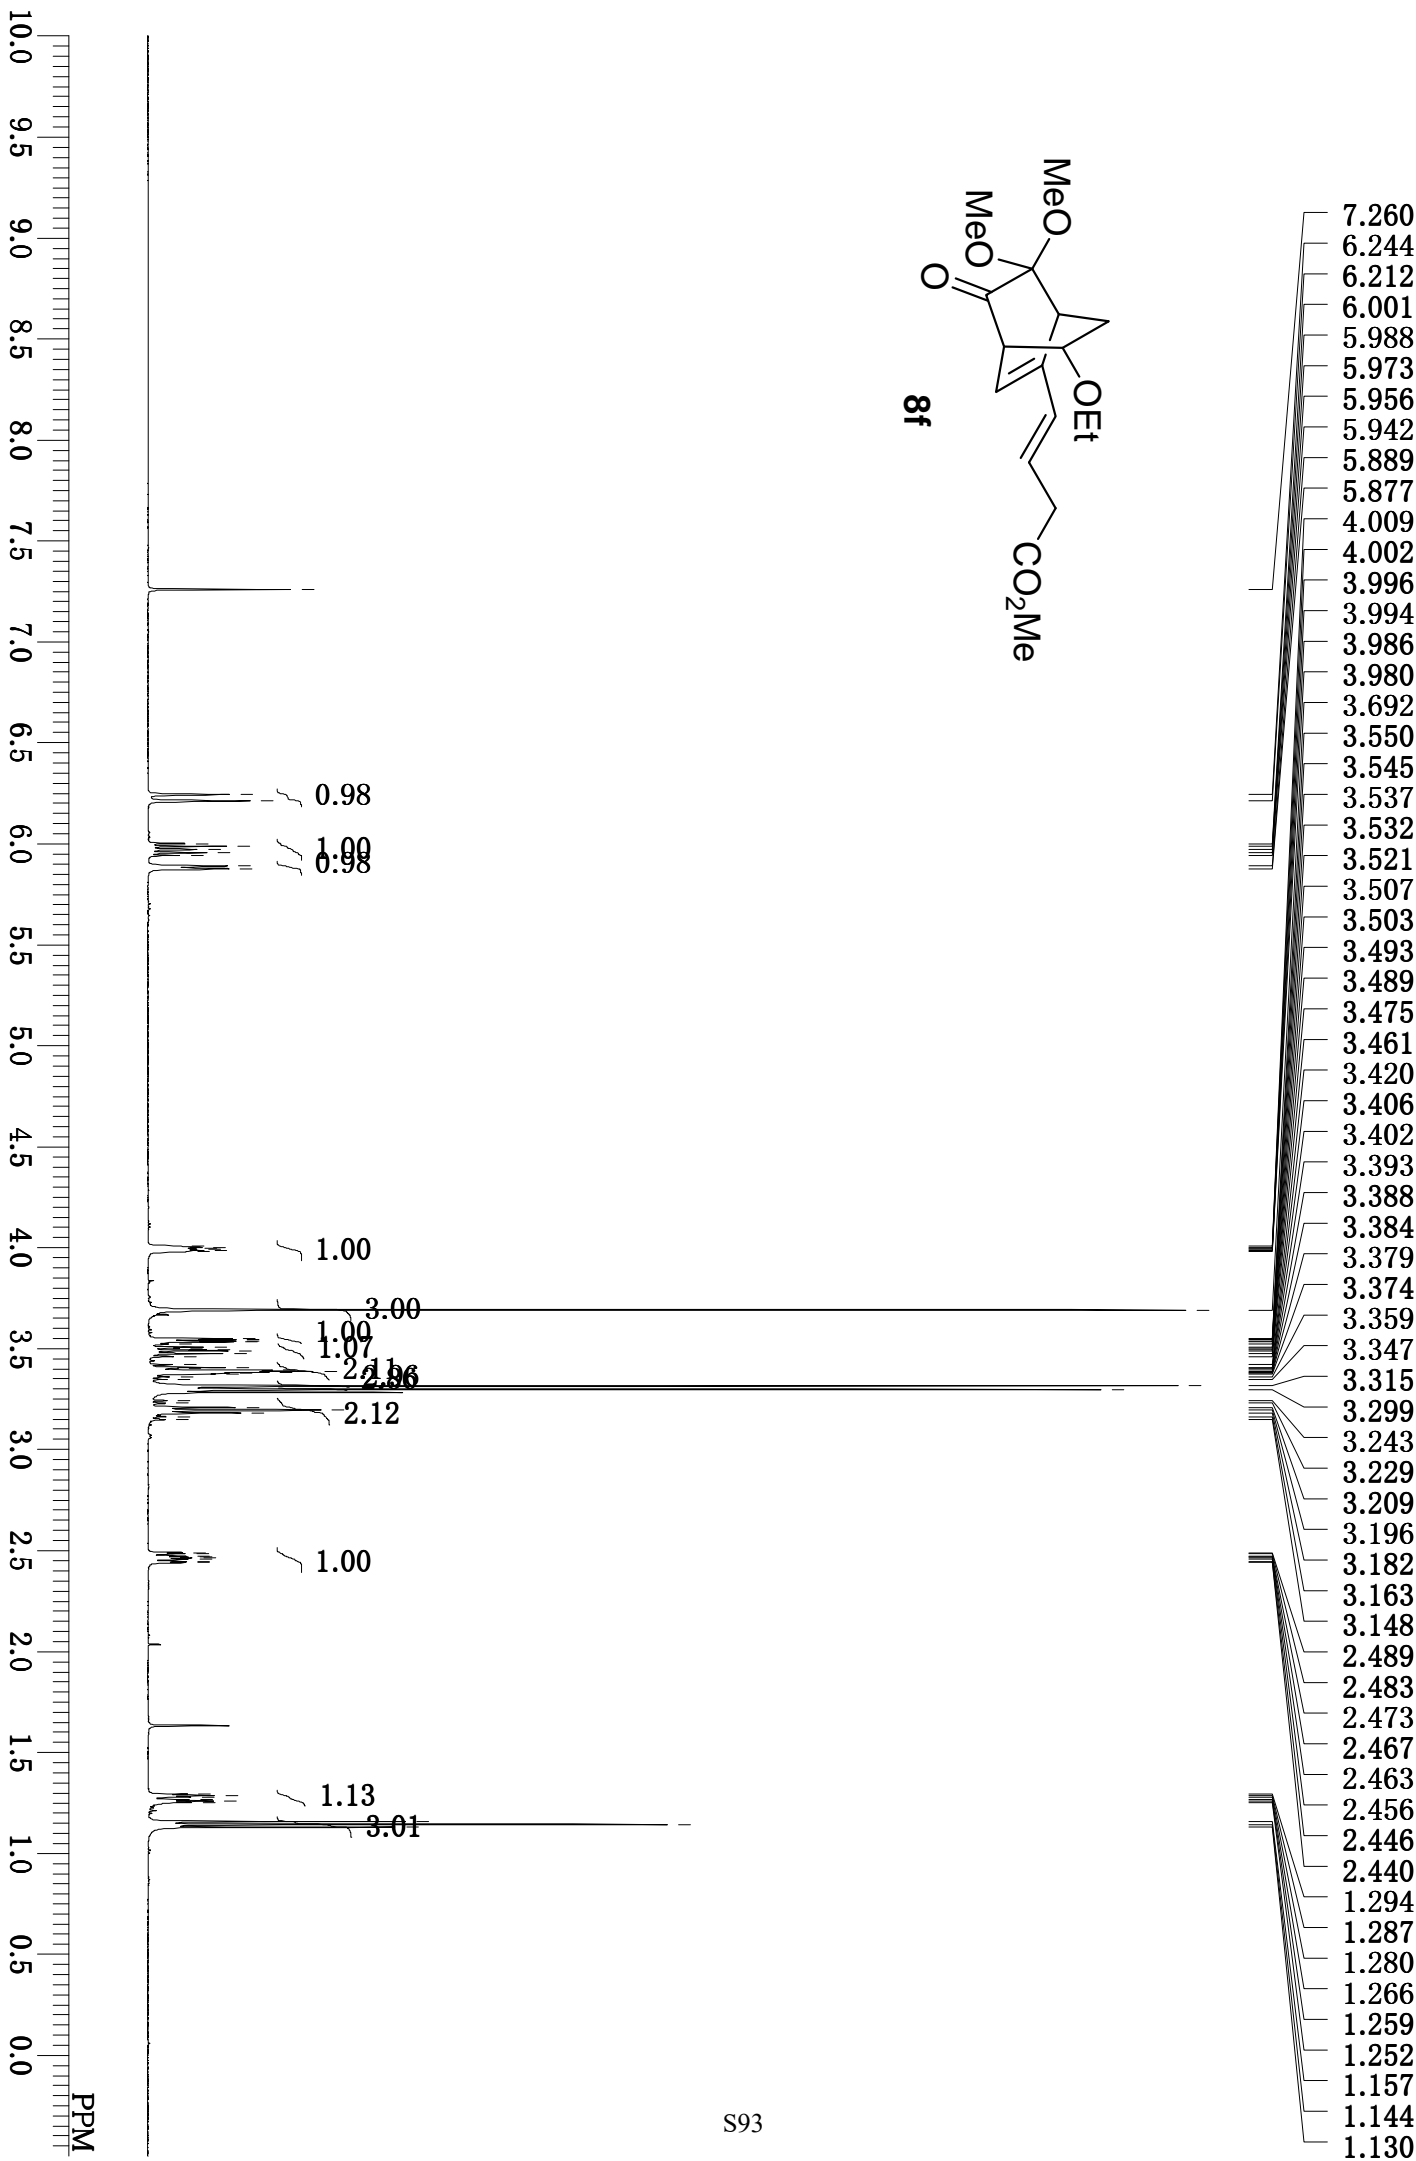

125 MHz, CDCl<sub>3</sub>

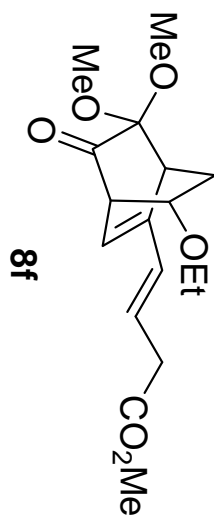

|         |  |
|---------|--|
| 200.435 |  |
| 171.801 |  |
| 143.845 |  |
| 131.178 |  |
| 121.573 |  |
| 121.267 |  |
| 93.749  |  |
| 77.000  |  |
| 74.882  |  |
| 64.285  |  |
| 54.013  |  |
| 51.905  |  |
| 50.684  |  |
| 49.844  |  |
| 37.788  |  |
| 37.607  |  |
| 30.339  |  |
| 15.287  |  |



500 MHz, CDCl<sub>3</sub>

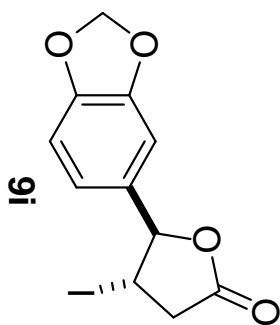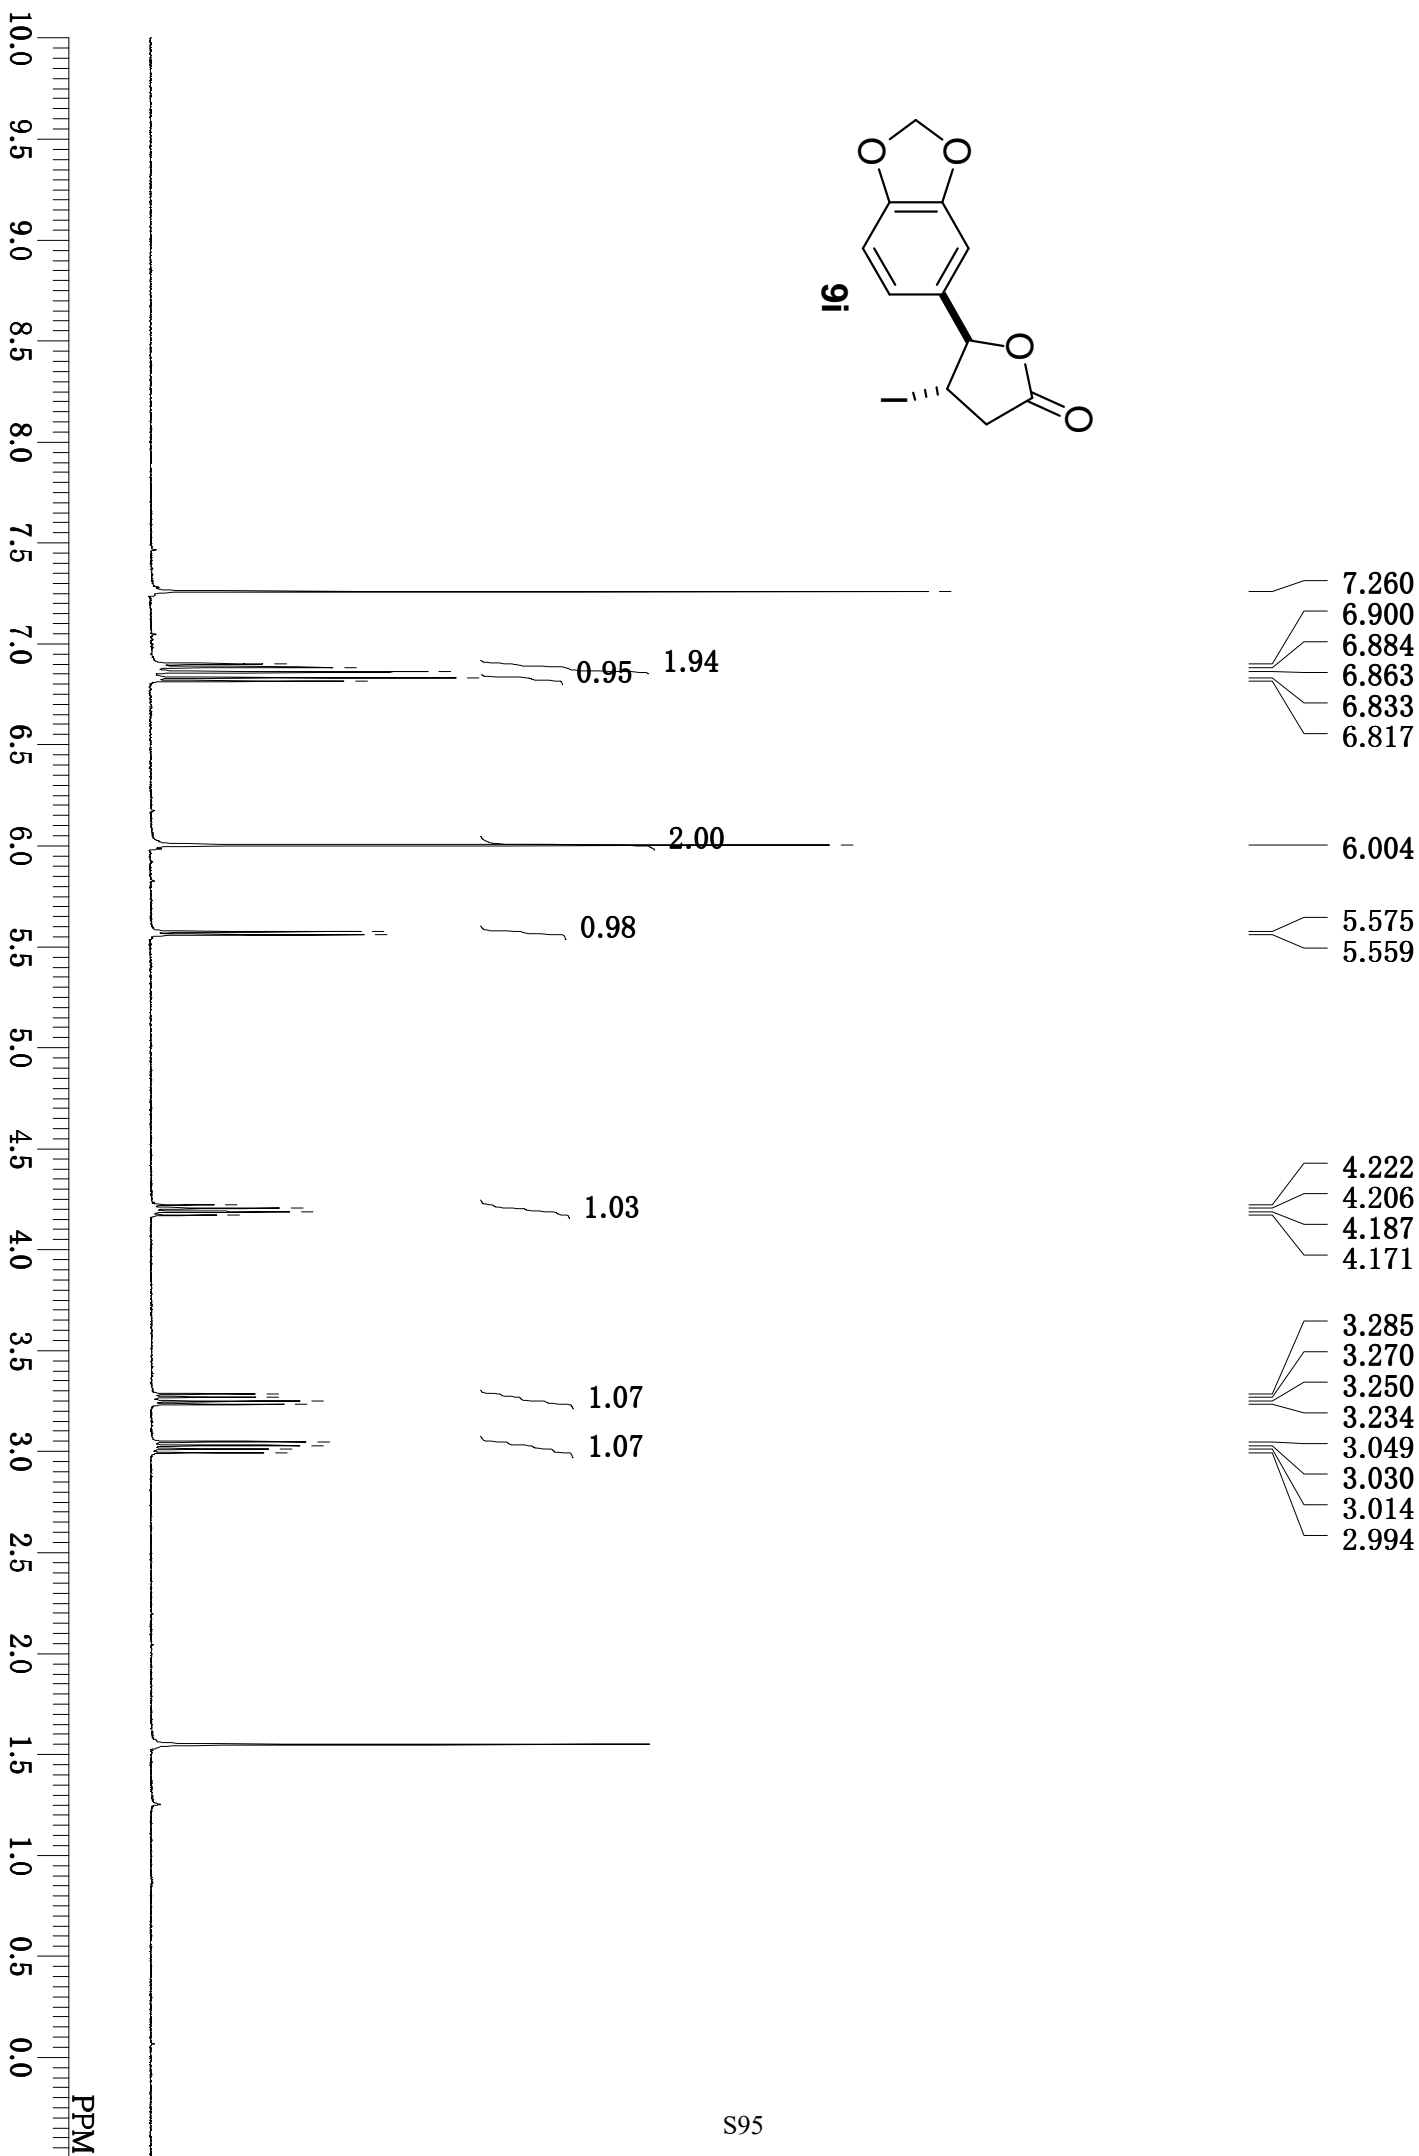

125 MHz, CDCl<sub>3</sub>

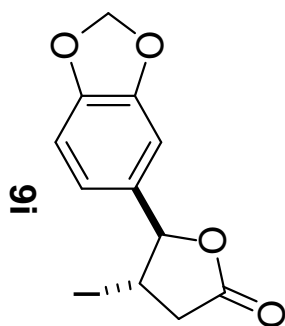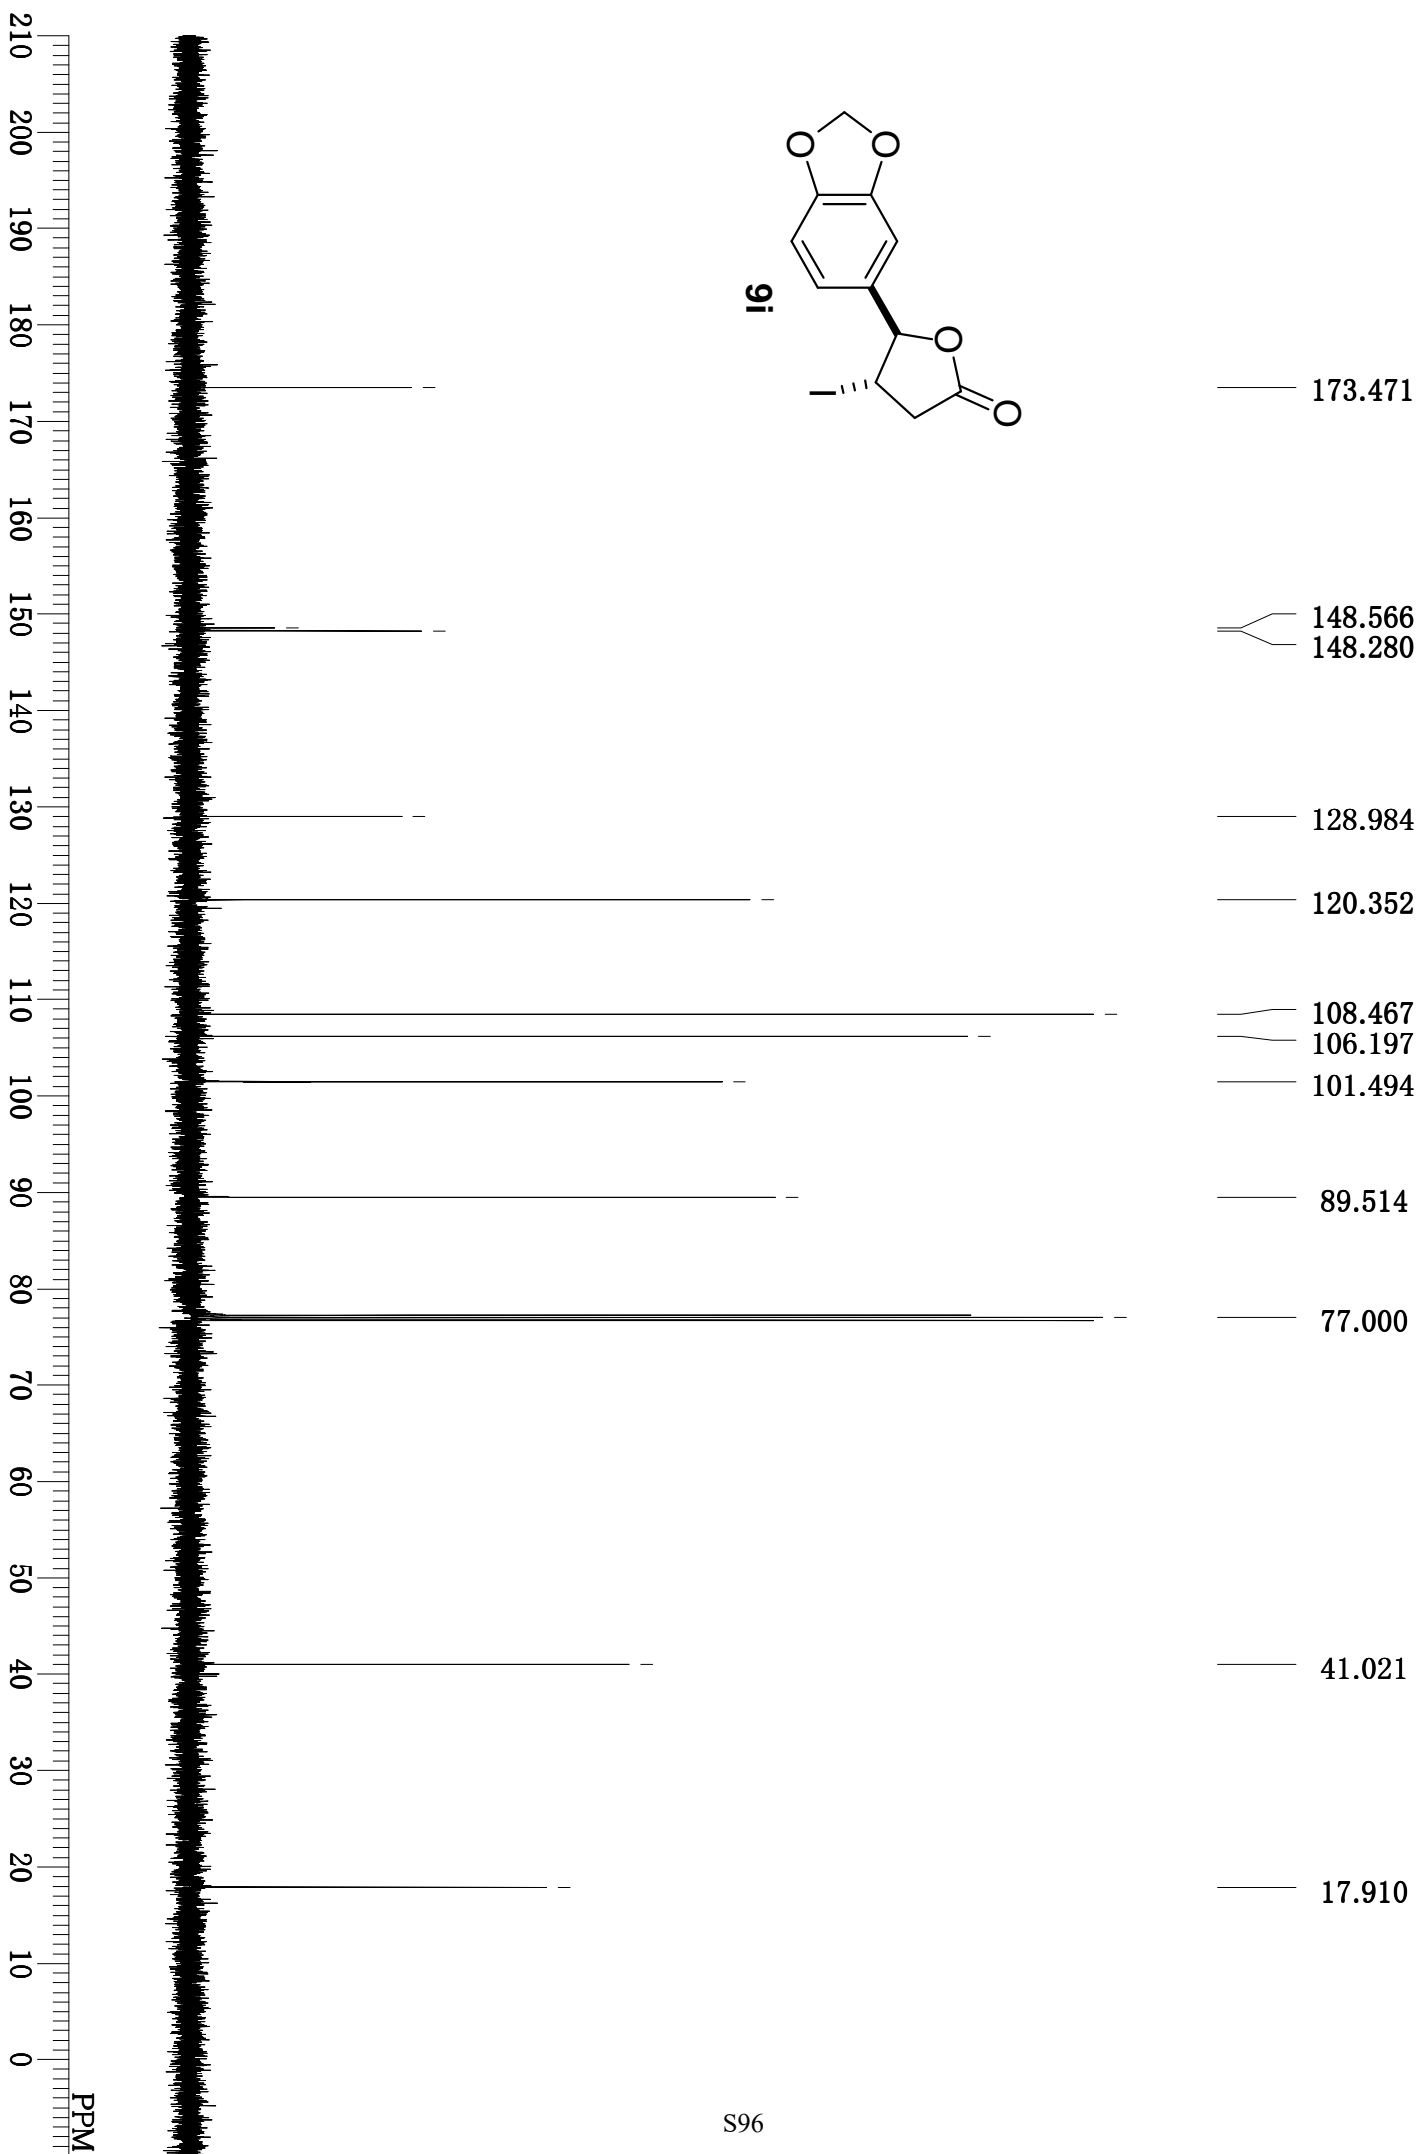



500 MHz, acetone-d<sub>6</sub>

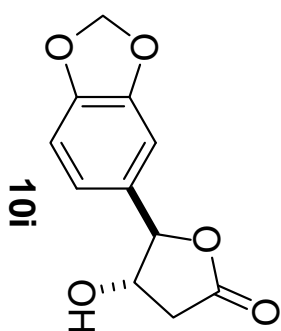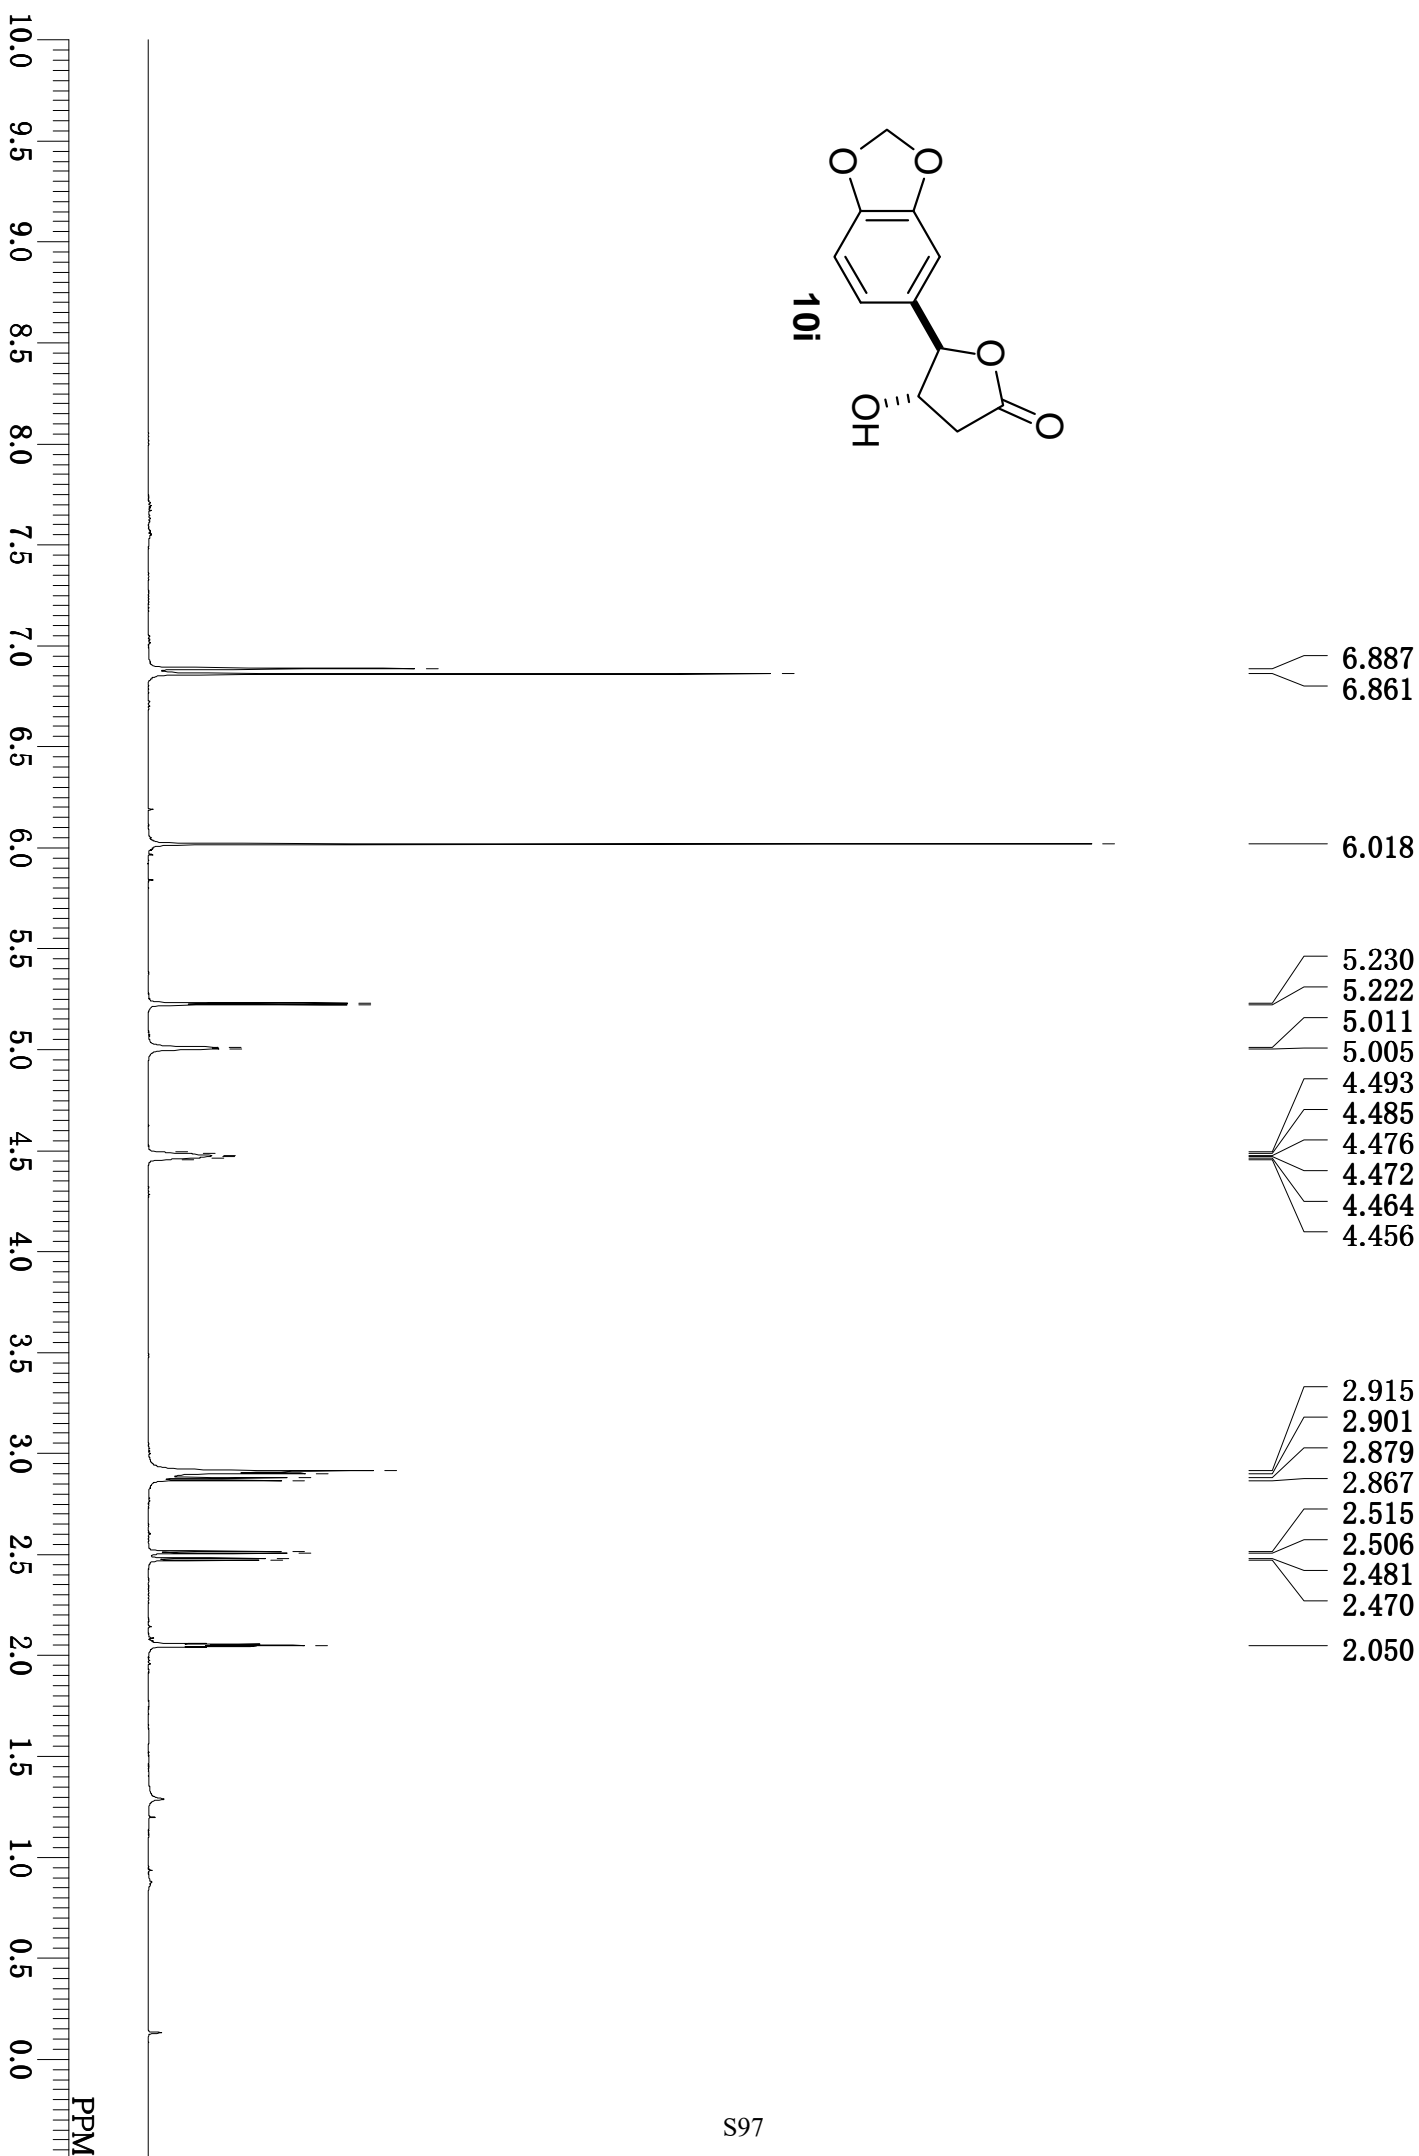

125 MHz, acetone-d<sub>6</sub>

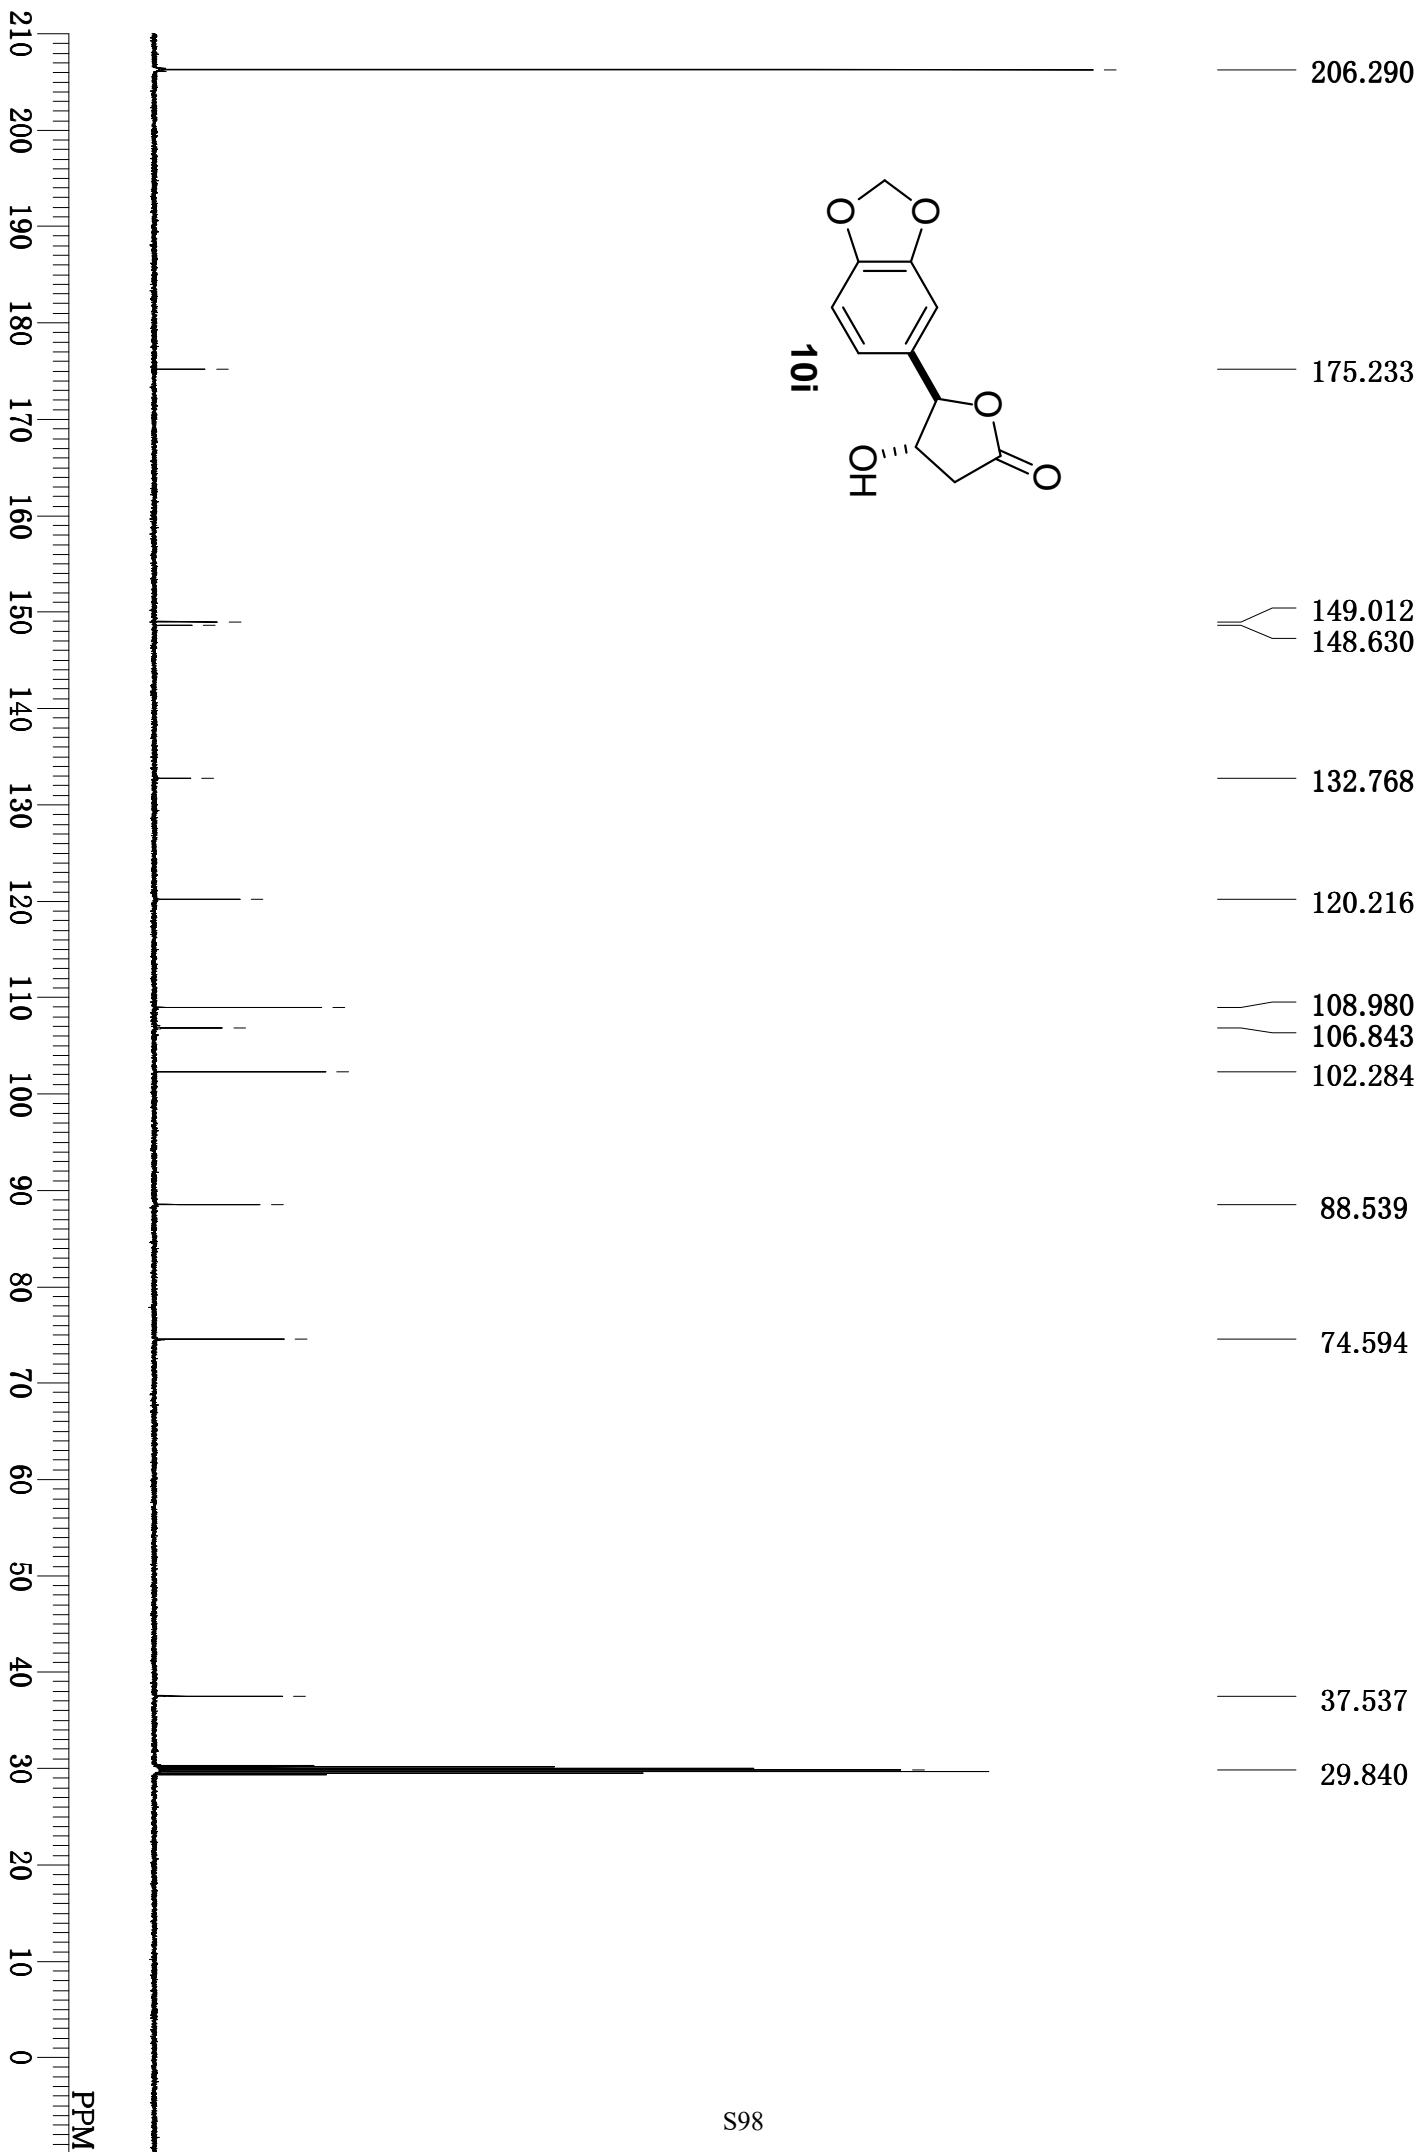

500 MHz, CDCl<sub>3</sub>

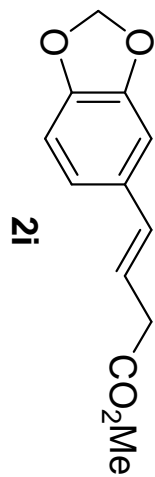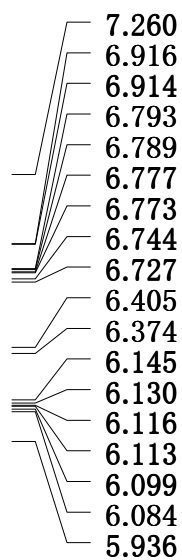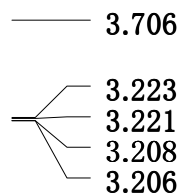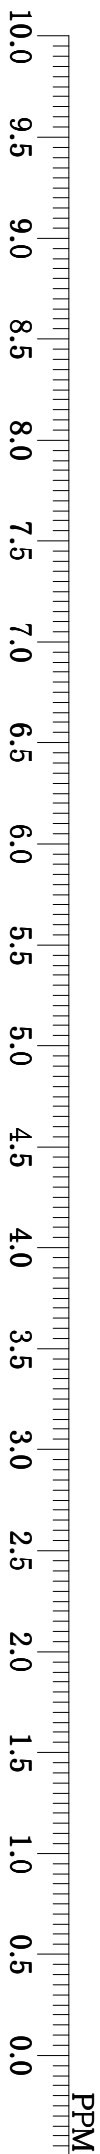

0.99

0.99

1.00

1.03

2.03

3.00

2.05

125 MHz, CDCl<sub>3</sub>

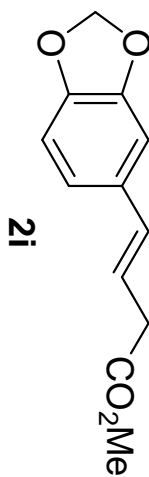

172.078

147.975  
147.164

133.019  
131.283

120.876  
119.818

108.209  
105.625  
101.027

77.000

51.895

38.103



500 MHz, CDCl<sub>3</sub>

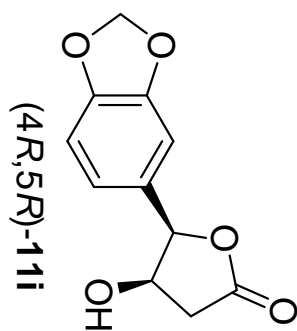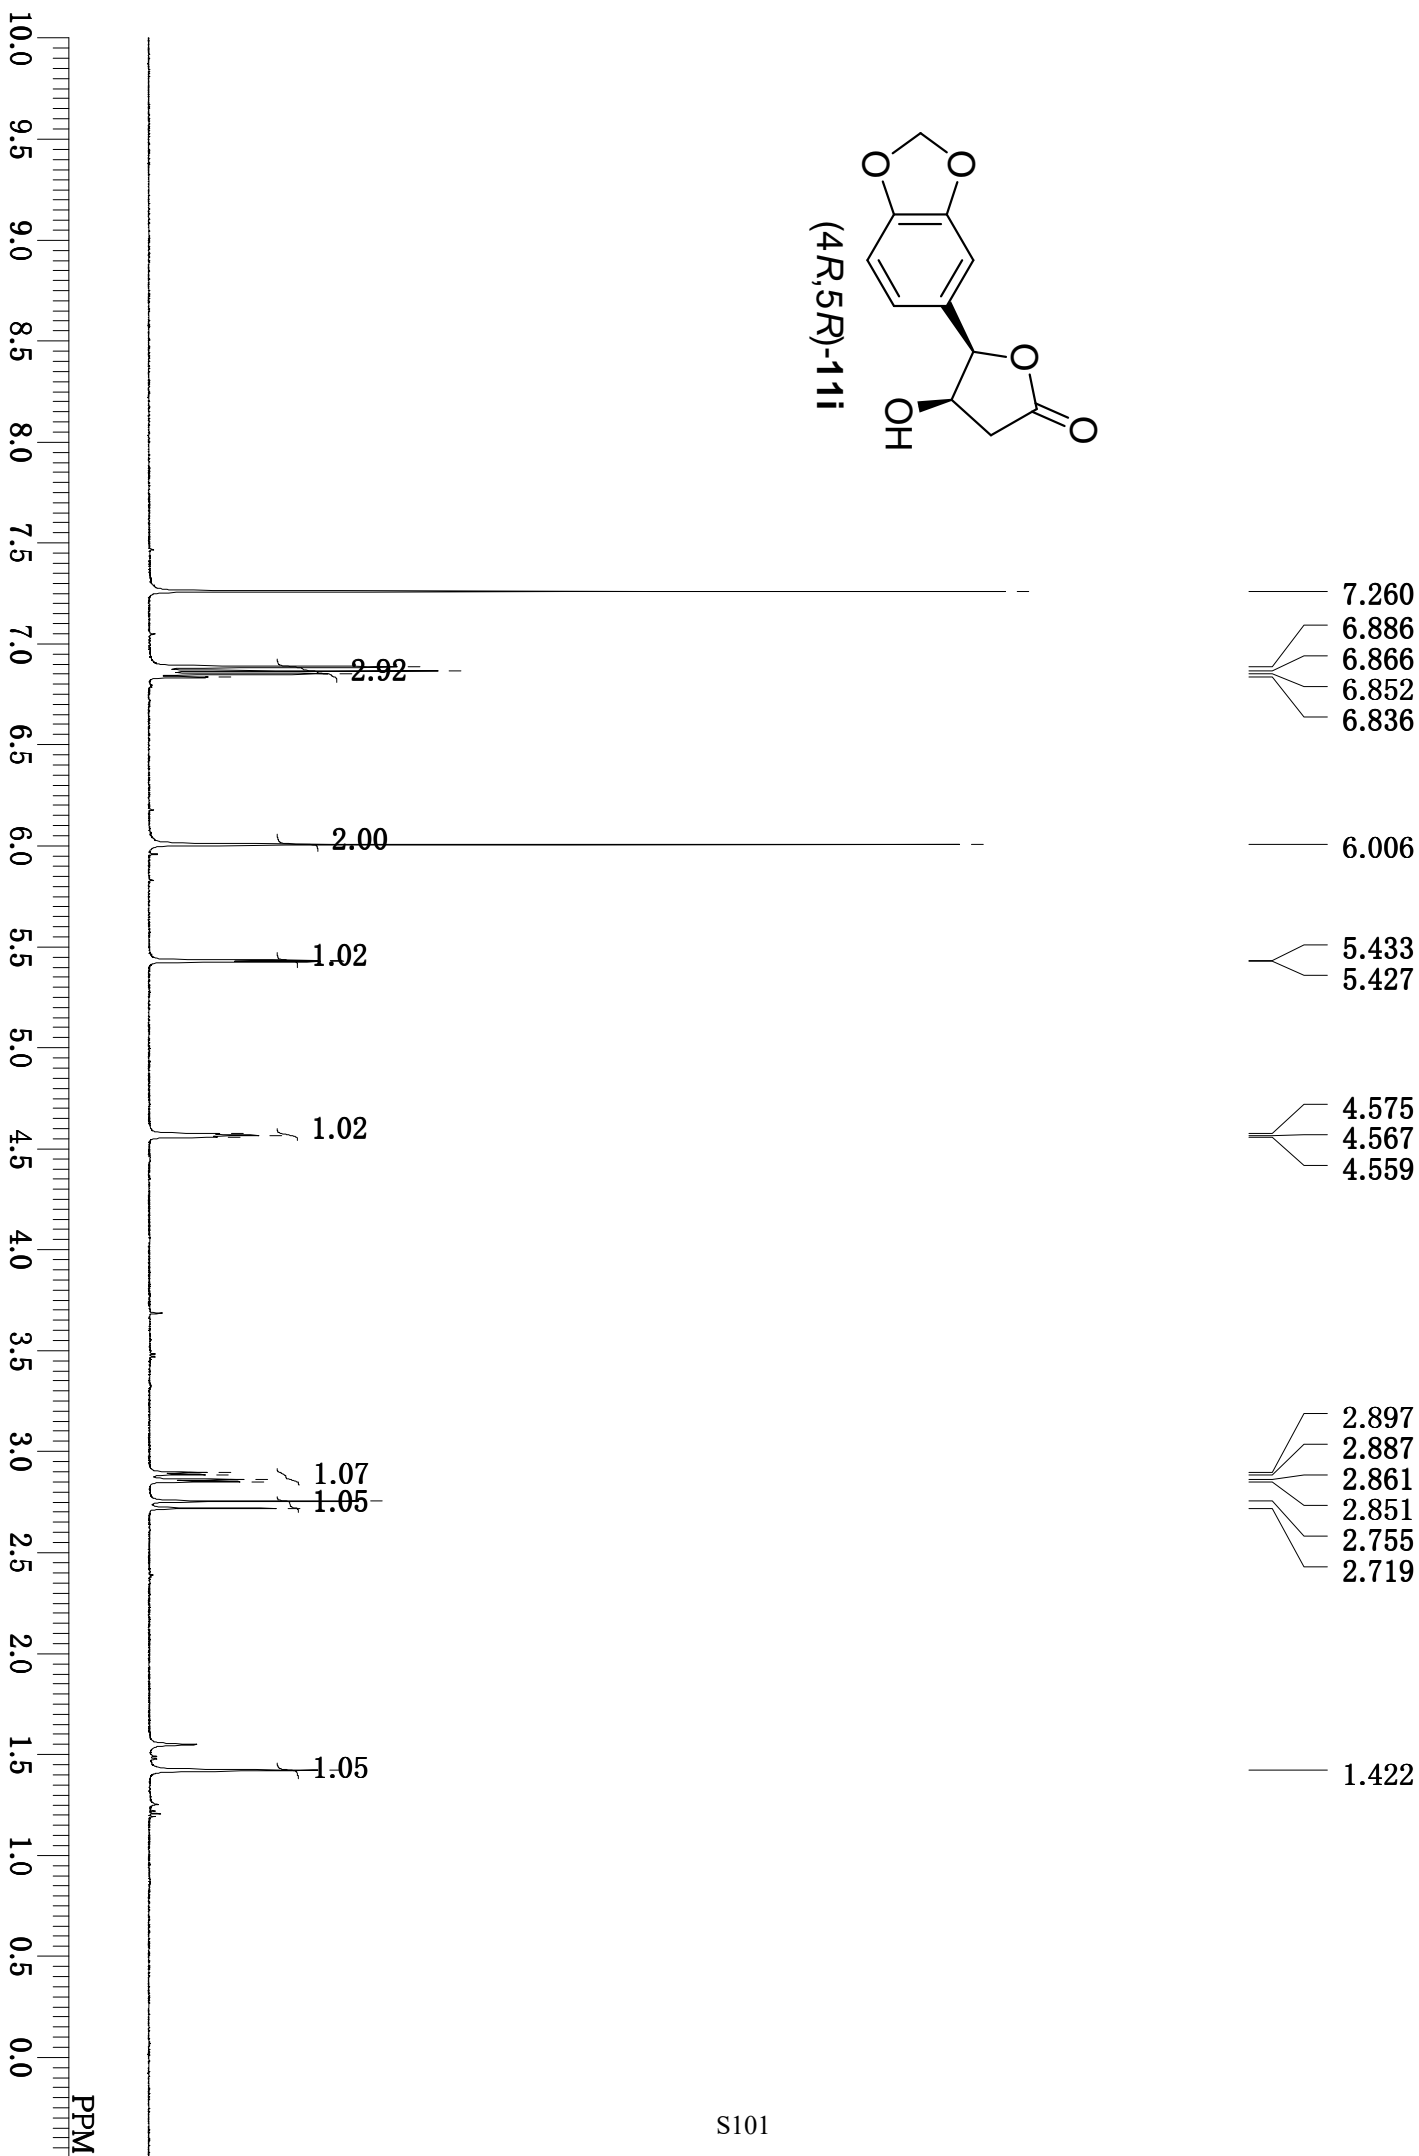

125 MHz, CDCl<sub>3</sub>

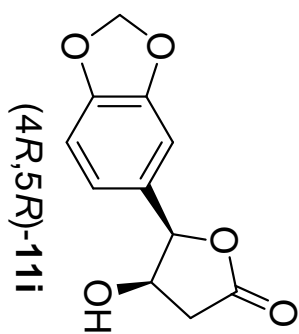

175.350

148.242  
148.146

126.552

119.837

108.600  
106.988

101.389

84.926

77.000

70.180

38.446



500 MHz, CDCl<sub>3</sub>

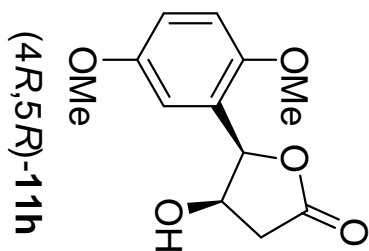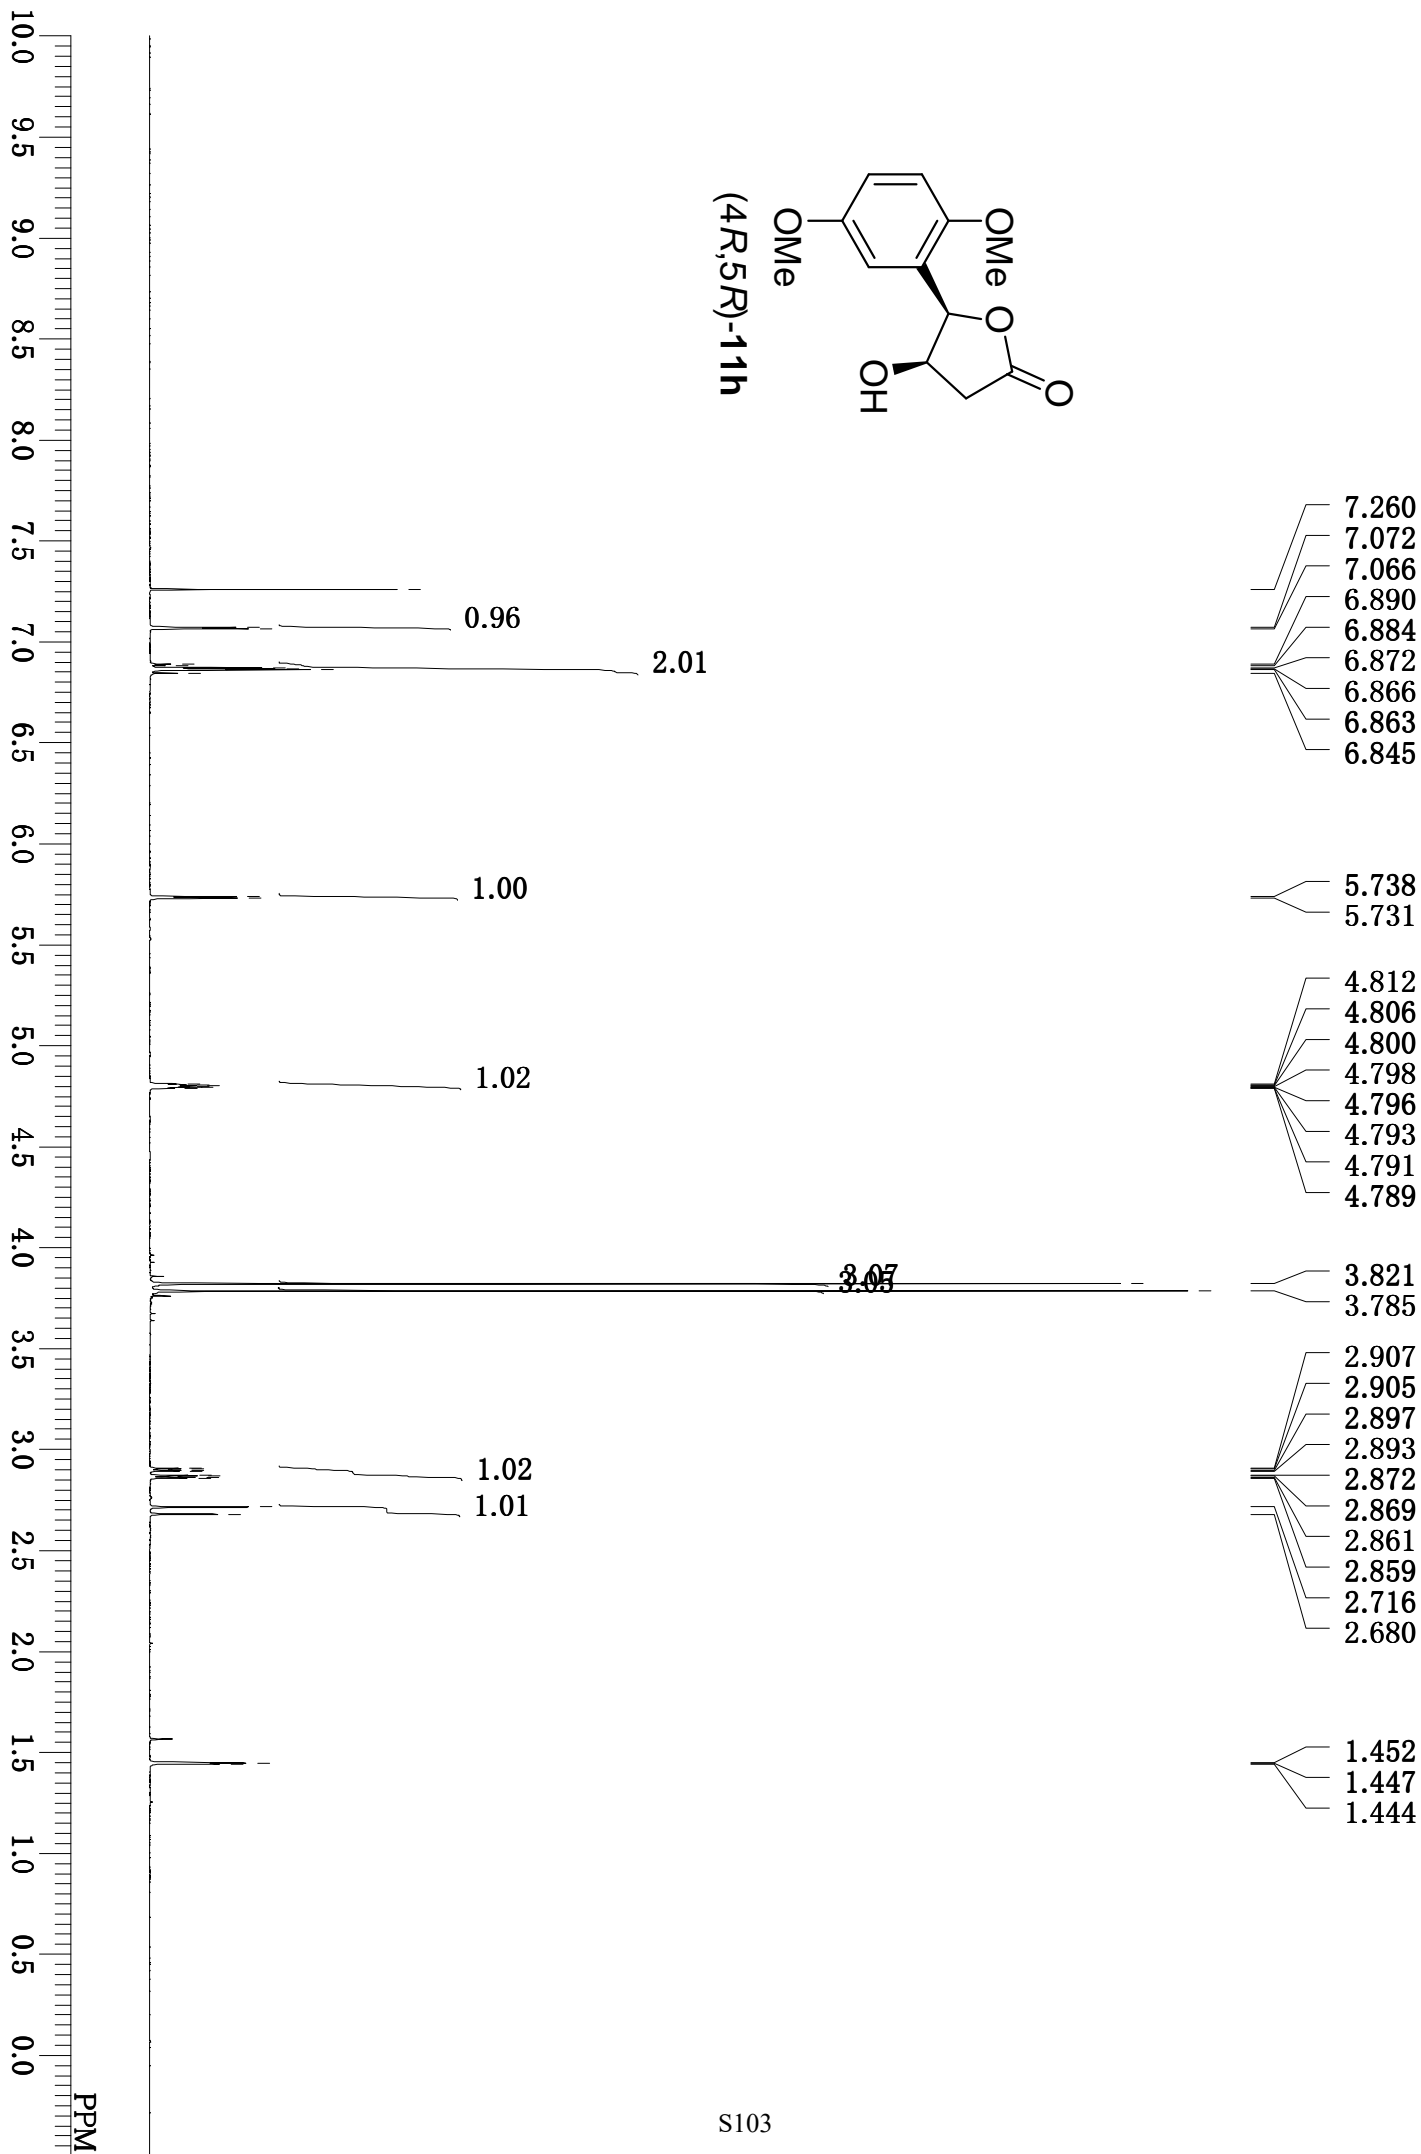

# Chromatogram

HPLC (DAICEL CHIRALPAK IA-3, hexane/2-propanol = 90/10, 1.0 mL/min, 290 nm)

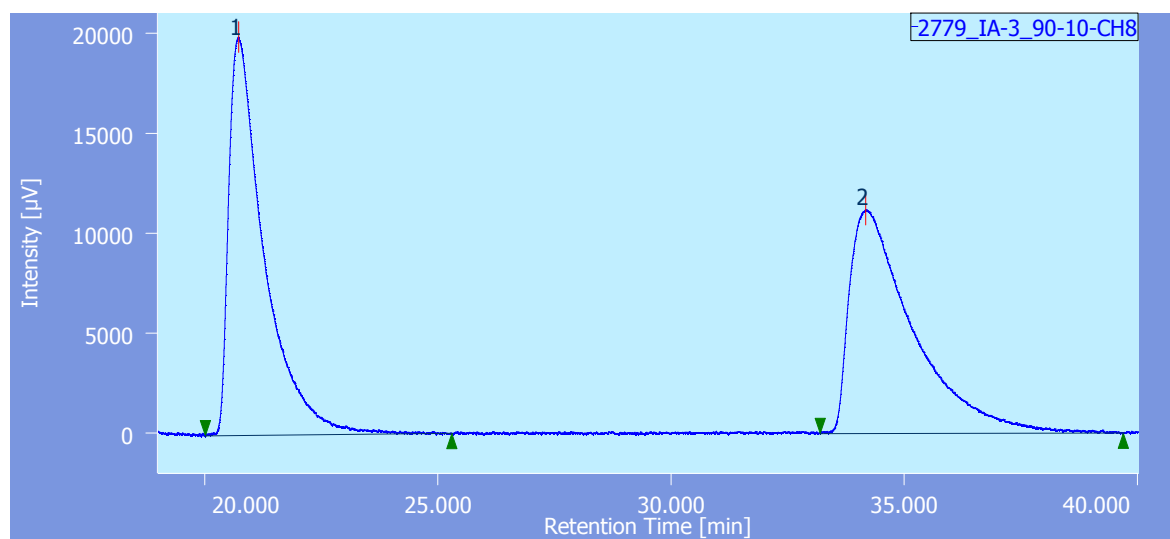

| Peak # | CH | tR [min] | Area [μV·sec] | Height [μV] | Area%  | Height% |
|--------|----|----------|---------------|-------------|--------|---------|
| 1      | 8  | 20.732   | 1049739       | 19917       | 49.756 | 64.032  |
| 2      | 8  | 34.165   | 1060050       | 11188       | 50.244 | 35.968  |

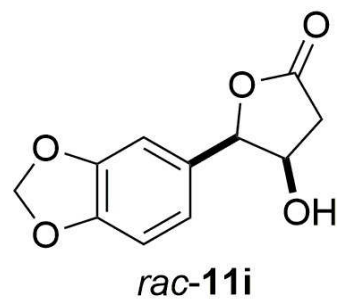



# Chromatogram

HPLC (DAICEL CHIRALPAK IA-3, hexane/2-propanol = 90/10, 1.0 mL/min, 290 nm)

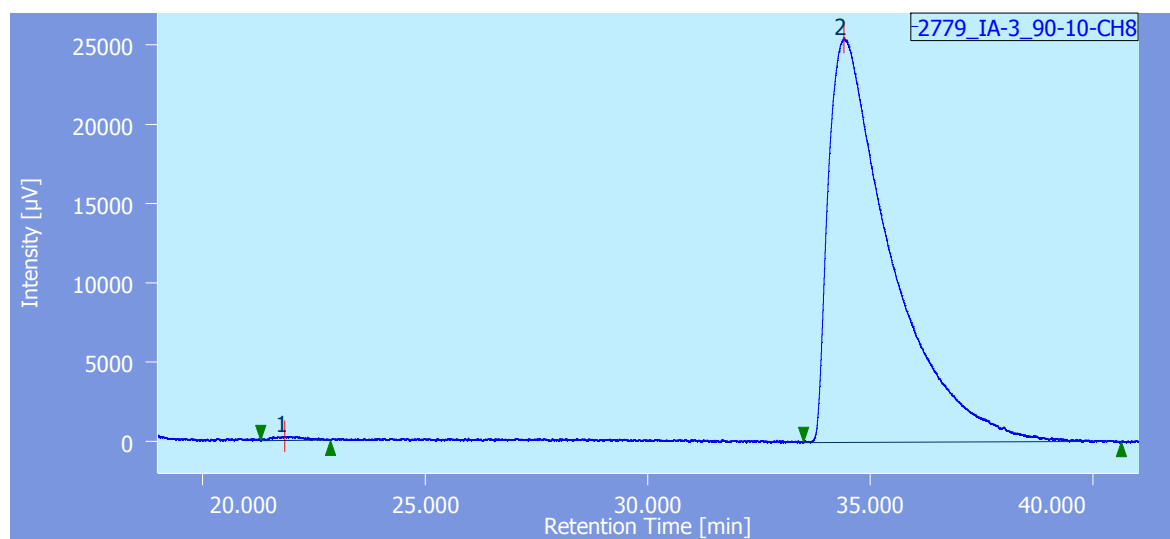

| Peak # | CH | tR [min] | Area [μV·sec] | Height [μV] | Area%  | Height% |
|--------|----|----------|---------------|-------------|--------|---------|
| 1      | 8  | 21.853   | 12244         | 264         | 0.493  | 1.025   |
| 2      | 8  | 34.402   | 2471937       | 25491       | 99.507 | 98.975  |

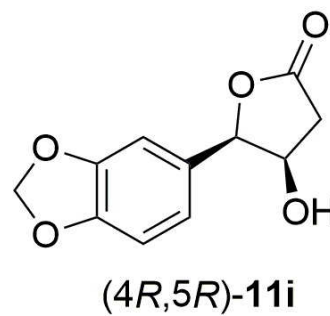

# Chromatogram

HPLC (DAICEL CHIRALPAK IA-3, hexane/2-propanol = 90/10, 1.0 mL/min, 290 nm)

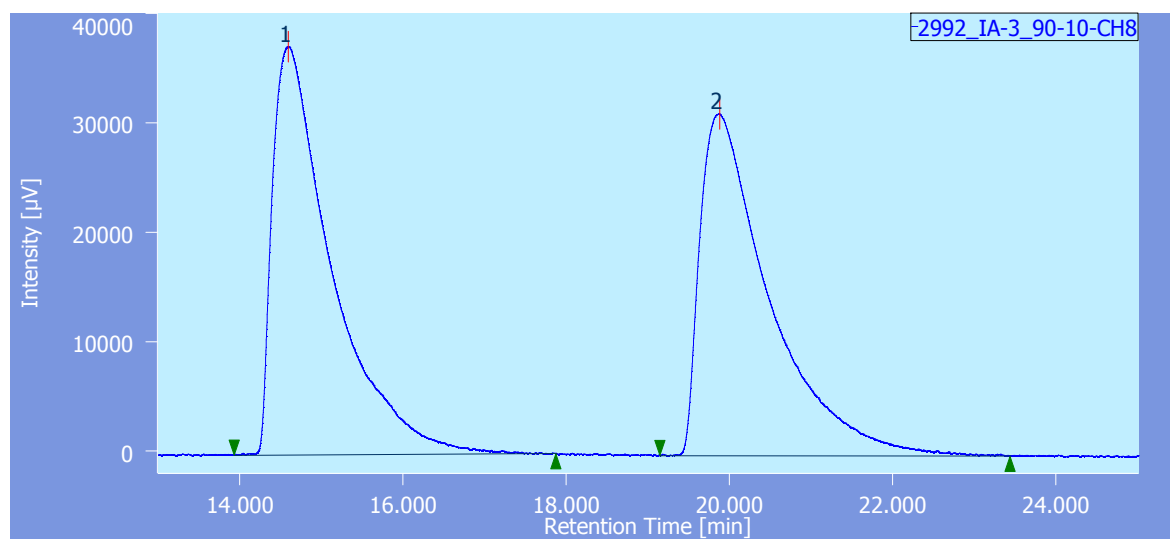

| Peak # | CH | tR [min] | Area [μV·sec] | Height [μV] | Area%  | Height% |
|--------|----|----------|---------------|-------------|--------|---------|
| 1      | 8  | 14.597   | 1871857       | 37270       | 50.280 | 54.411  |
| 2      | 8  | 19.878   | 1851015       | 31227       | 49.720 | 45.589  |

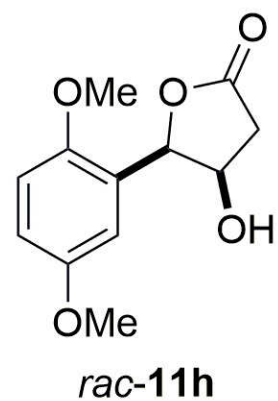

# Chromatogram

HPLC (DAICEL CHIRALPAK IA-3, hexane/2-propanol = 90/10, 1.0 mL/min, 290 nm)

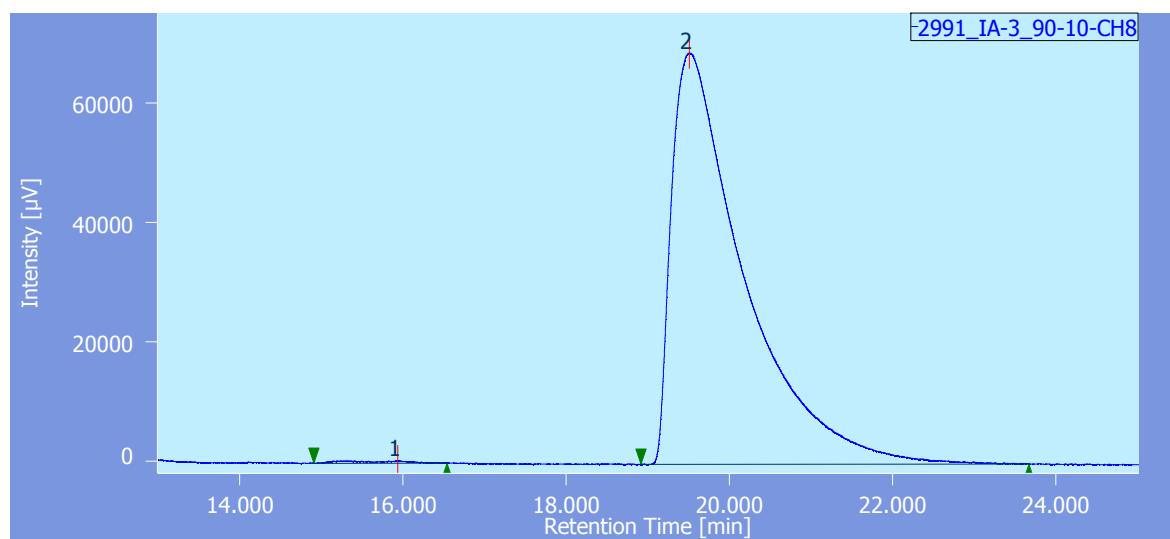

| Peak # | CH | tR [min] | Area [μV·sec] | Height [μV] | Area%  | Height% |
|--------|----|----------|---------------|-------------|--------|---------|
| 1      | 8  | 15.940   | 20307         | 389         | 0.477  | 0.562   |
| 2      | 8  | 19.507   | 4240940       | 68816       | 99.523 | 99.438  |

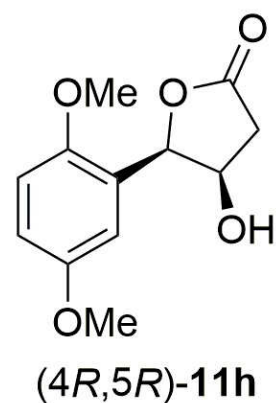

Supplement: Supplementary file 1 [file 8225537]
